# Supplementary material for: Three component solvent-free synthesis of 1H-pyrazol-5(4H)-one-based heterocyclic ketene aminal derivatives
Source: Royal Society of Chemistry journal article supplement (doi:10.1039/c3ra41547c), 2013-01-01
Supplement: c3ra41547c.pdf [file c3ra41547c.pdf]

# Three-Component Solvent-free Synthesis of 1*H*-pyrazol-5-(4*H*)-one-Based Heterocyclic Ketene Aminals Derivatives

Fuchao Yu,<sup>a</sup> Zhiqiong Chen,<sup>a</sup> Xiaopan Hao,<sup>a</sup> Xiuyang Jiang,<sup>a</sup> Shengjiao Yan<sup>\*,a</sup>, Jun Lin<sup>\*,a,b</sup>

<sup>a</sup>Key Laboratory of Medicinal Chemistry for Natural Resource (Yunnan University), Ministry of Education, School of Chemical Science and Technology, Yunnan University, Kunming, 650091, P. R. China

<sup>b</sup>State Key Laboratory of Elemento-organic Chemistry, Nankai University, Tianjin, 300071, P. R. China

## Supporting Information

### Table of Contents

|                                                                                                                                                               |    |
|---------------------------------------------------------------------------------------------------------------------------------------------------------------|----|
| General Information.....                                                                                                                                      | 4  |
| General Procedure for the Preparation of $\alpha,\beta$ -Unsaturated Pyrazolone-Based HKAs Derivative <b>6</b> via Three-Component Reaction in One-Pot.....   | 4  |
| Spectroscopic Data of $\alpha,\beta$ -Unsaturated Pyrazolone-Based HKAs Derivative <b>6</b> .....                                                             | 5  |
| General Procedure for the Preparation of $\alpha,\beta$ -Unsaturated Pyrazolone-Based HKAs Derivative <b>7–8</b> via Three-Component Reaction in One-Pot..... | 11 |
| X-ray Structure and Data of <b>6c</b> .....                                                                                                                   | 21 |
| <sup>1</sup> H NMR and <sup>13</sup> C NMR Spectra for $\alpha,\beta$ -Unsaturated Pyrazolone-Based HKAs <b>6-8</b> .....                                     | 27 |
| <b>Figure 1.</b> <sup>1</sup> H NMR (400 MHz, DMSO- <i>d</i> <sub>6</sub> ) spectra of compound <b>6a</b> .....                                               | 27 |
| <b>Figure 2.</b> <sup>13</sup> C NMR (100 MHz, DMSO- <i>d</i> <sub>6</sub> ) spectra of compound <b>6a</b> .....                                              | 28 |
| <b>Figure 3.</b> <sup>1</sup> H NMR (500 MHz, DMSO- <i>d</i> <sub>6</sub> +HClO <sub>4</sub> ) spectra of compound <b>6b</b> .....                            | 29 |
| <b>Figure 4.</b> <sup>13</sup> C NMR (125 MHz, DMSO- <i>d</i> <sub>6</sub> +HClO <sub>4</sub> ) spectra of compound <b>6b</b> .....                           | 30 |
| <b>Figure 5.</b> <sup>1</sup> H NMR (400 MHz, CDCl <sub>3</sub> ) spectra of compound <b>6c</b> .....                                                         | 31 |
| <b>Figure 6.</b> <sup>13</sup> C NMR (100 MHz, CDCl <sub>3</sub> ) spectra of compound <b>6c</b> .....                                                        | 32 |
| <b>Figure 7.</b> <sup>1</sup> H NMR (400 MHz, DMSO- <i>d</i> <sub>6</sub> ) spectra of compound <b>6d</b> .....                                               | 33 |
| <b>Figure 8.</b> <sup>13</sup> C NMR (100 MHz, DMSO- <i>d</i> <sub>6</sub> ) spectra of compound <b>6d</b> .....                                              | 34 |
| <b>Figure 9.</b> <sup>1</sup> H NMR (400 MHz, DMSO- <i>d</i> <sub>6</sub> ) spectra of compound <b>6e</b> .....                                               | 35 |
| <b>Figure 10.</b> <sup>13</sup> C NMR (100 MHz, DMSO- <i>d</i> <sub>6</sub> ) spectra of compound <b>6e</b> .....                                             | 36 |
| <b>Figure 11.</b> <sup>1</sup> H NMR (400 MHz, DMSO- <i>d</i> <sub>6</sub> ) spectra of compound <b>6f</b> .....                                              | 37 |
| <b>Figure 12.</b> <sup>13</sup> C NMR (100 MHz, DMSO- <i>d</i> <sub>6</sub> ) spectra of compound <b>6f</b> .....                                             | 38 |
| <b>Figure 13.</b> <sup>1</sup> H NMR (400 MHz, CDCl <sub>3</sub> ) spectra of compound <b>6g</b> .....                                                        | 39 |
| <b>Figure 14.</b> <sup>13</sup> C NMR (100 MHz, CDCl <sub>3</sub> ) spectra of compound <b>6g</b> .....                                                       | 40 |

|                                                                                                         |    |
|---------------------------------------------------------------------------------------------------------|----|
| <b>Figure 15.</b> $^1\text{H}$ NMR (400 MHz, $\text{CDCl}_3$ ) spectra of compound <b>6h</b> .....      | 41 |
| <b>Figure 16.</b> $^{13}\text{C}$ NMR (100 MHz, $\text{CDCl}_3$ ) spectra of compound <b>6h</b> .....   | 42 |
| <b>Figure 17.</b> $^1\text{H}$ NMR (400 MHz, $\text{CDCl}_3$ ) spectra of compound <b>6i</b> .....      | 43 |
| <b>Figure 18.</b> $^{13}\text{C}$ NMR (100 MHz, $\text{CDCl}_3$ ) spectra of compound <b>6i</b> .....   | 44 |
| <b>Figure 19.</b> $^1\text{H}$ NMR (400 MHz, $\text{DMSO-}d_6$ ) spectra of compound <b>6j</b> .....    | 45 |
| <b>Figure 20.</b> $^{13}\text{C}$ NMR (100 MHz, $\text{DMSO-}d_6$ ) spectra of compound <b>6j</b> ..... | 46 |
| <b>Figure 21.</b> $^1\text{H}$ NMR (400 MHz, $\text{DMSO-}d_6$ ) spectra of compound <b>6k</b> .....    | 47 |
| <b>Figure 22.</b> $^{13}\text{C}$ NMR (100 MHz, $\text{DMSO-}d_6$ ) spectra of compound <b>6k</b> ..... | 48 |
| <b>Figure 23.</b> $^1\text{H}$ NMR (400 MHz, $\text{DMSO-}d_6$ ) spectra of compound <b>6l</b> .....    | 49 |
| <b>Figure 24.</b> $^{13}\text{C}$ NMR (100 MHz, $\text{DMSO-}d_6$ ) spectra of compound <b>6l</b> ..... | 50 |
| <b>Figure 25.</b> $^1\text{H}$ NMR (400 MHz, $\text{DMSO-}d_6$ ) spectra of compound <b>6m</b> .....    | 51 |
| <b>Figure 26.</b> $^{13}\text{C}$ NMR (100 MHz, $\text{DMSO-}d_6$ ) spectra of compound <b>6m</b> ..... | 52 |
| <b>Figure 27.</b> $^1\text{H}$ NMR (400 MHz, $\text{DMSO-}d_6$ ) spectra of compound <b>6n</b> .....    | 53 |
| <b>Figure 28.</b> $^{13}\text{C}$ NMR (100 MHz, $\text{DMSO-}d_6$ ) spectra of compound <b>6n</b> ..... | 54 |
| <b>Figure 29.</b> $^1\text{H}$ NMR (500 MHz, $\text{DMSO-}d_6$ ) spectra of compound <b>7a</b> .....    | 55 |
| <b>Figure 30.</b> $^{13}\text{C}$ NMR (125 MHz, $\text{DMSO-}d_6$ ) spectra of compound <b>7a</b> ..... | 56 |
| <b>Figure 31.</b> $^1\text{H}$ NMR (400 MHz, $\text{DMSO-}d_6$ ) spectra of compound <b>7b</b> .....    | 57 |
| <b>Figure 32.</b> $^{13}\text{C}$ NMR (100 MHz, $\text{DMSO-}d_6$ ) spectra of compound <b>7b</b> ..... | 58 |
| <b>Figure 33.</b> $^1\text{H}$ NMR (400 MHz, $\text{DMSO-}d_6$ ) spectra of compound <b>7c</b> .....    | 59 |
| <b>Figure 34.</b> $^{13}\text{C}$ NMR (100 MHz, $\text{DMSO-}d_6$ ) spectra of compound <b>7c</b> ..... | 60 |
| <b>Figure 35.</b> $^1\text{H}$ NMR (400 MHz, $\text{DMSO-}d_6$ ) spectra of compound <b>7d</b> .....    | 61 |
| <b>Figure 36.</b> $^{13}\text{C}$ NMR (100 MHz, $\text{DMSO-}d_6$ ) spectra of compound <b>7d</b> ..... | 62 |
| <b>Figure 37.</b> $^1\text{H}$ NMR (400 MHz, $\text{DMSO-}d_6$ ) spectra of compound <b>7e</b> .....    | 63 |
| <b>Figure 38.</b> $^{13}\text{C}$ NMR (100 MHz, $\text{DMSO-}d_6$ ) spectra of compound <b>7e</b> ..... | 64 |
| <b>Figure 39.</b> $^1\text{H}$ NMR (500 MHz, $\text{DMSO-}d_6$ ) spectra of compound <b>7f</b> .....    | 65 |
| <b>Figure 40.</b> $^{13}\text{C}$ NMR (125 MHz, $\text{DMSO-}d_6$ ) spectra of compound <b>7f</b> ..... | 66 |
| <b>Figure 41.</b> $^1\text{H}$ NMR (400 MHz, $\text{DMSO-}d_6$ ) spectra of compound <b>7g</b> .....    | 67 |
| <b>Figure 42.</b> $^{13}\text{C}$ NMR (100 MHz, $\text{DMSO-}d_6$ ) spectra of compound <b>7g</b> ..... | 68 |
| <b>Figure 43.</b> $^1\text{H}$ NMR (400 MHz, $\text{DMSO-}d_6$ ) spectra of compound <b>7h</b> .....    | 69 |
| <b>Figure 44.</b> $^{13}\text{C}$ NMR (100 MHz, $\text{DMSO-}d_6$ ) spectra of compound <b>7h</b> ..... | 70 |
| <b>Figure 45.</b> $^1\text{H}$ NMR (400 MHz, $\text{DMSO-}d_6$ ) spectra of compound <b>7i</b> .....    | 71 |
| <b>Figure 46.</b> $^{13}\text{C}$ NMR (100 MHz, $\text{DMSO-}d_6$ ) spectra of compound <b>7i</b> ..... | 72 |
| <b>Figure 47.</b> $^1\text{H}$ NMR (400 MHz, $\text{DMSO-}d_6$ ) spectra of compound <b>7j</b> .....    | 73 |
| <b>Figure 48.</b> $^{13}\text{C}$ NMR (100 MHz, $\text{DMSO-}d_6$ ) spectra of compound <b>7j</b> ..... | 74 |
| <b>Figure 49.</b> $^1\text{H}$ NMR (400 MHz, $\text{DMSO-}d_6$ ) spectra of compound <b>7k</b> .....    | 75 |
| <b>Figure 50.</b> $^{13}\text{C}$ NMR (100 MHz, $\text{DMSO-}d_6$ ) spectra of compound <b>7k</b> ..... | 76 |
| <b>Figure 51.</b> $^1\text{H}$ NMR (400 MHz, $\text{DMSO-}d_6$ ) spectra of compound <b>7l</b> .....    | 77 |
| <b>Figure 52.</b> $^{13}\text{C}$ NMR (100 MHz, $\text{DMSO-}d_6$ ) spectra of compound <b>7l</b> ..... | 78 |
| <b>Figure 53.</b> $^1\text{H}$ NMR (400 MHz, $\text{DMSO-}d_6$ ) spectra of compound <b>7m</b> .....    | 79 |
| <b>Figure 54.</b> $^{13}\text{C}$ NMR (100 MHz, $\text{DMSO-}d_6$ ) spectra of compound <b>7m</b> ..... | 80 |

|                                                                                                         |     |
|---------------------------------------------------------------------------------------------------------|-----|
| <b>Figure 55.</b> $^1\text{H}$ NMR (400 MHz, $\text{DMSO-}d_6$ ) spectra of compound <b>8a</b> .....    | 81  |
| <b>Figure 56.</b> $^{13}\text{C}$ NMR (100 MHz, $\text{DMSO-}d_6$ ) spectra of compound <b>8a</b> ..... | 82  |
| <b>Figure 57.</b> $^1\text{H}$ NMR (400 MHz, $\text{DMSO-}d_6$ ) spectra of compound <b>8b</b> .....    | 83  |
| <b>Figure 58.</b> $^{13}\text{C}$ NMR (100 MHz, $\text{DMSO-}d_6$ ) spectra of compound <b>8b</b> ..... | 84  |
| <b>Figure 59.</b> $^1\text{H}$ NMR (400 MHz, $\text{CDCl}_3$ ) spectra of compound <b>8c</b> .....      | 85  |
| <b>Figure 60.</b> $^{13}\text{C}$ NMR (100 MHz, $\text{CDCl}_3$ ) spectra of compound <b>8c</b> .....   | 86  |
| <b>Figure 61.</b> $^1\text{H}$ NMR (400 MHz, $\text{DMSO-}d_6$ ) spectra of compound <b>8d</b> .....    | 87  |
| <b>Figure 62.</b> $^{13}\text{C}$ NMR (100 MHz, $\text{DMSO-}d_6$ ) spectra of compound <b>8d</b> ..... | 88  |
| <b>Figure 63.</b> $^1\text{H}$ NMR (500 MHz, $\text{DMSO-}d_6$ ) spectra of compound <b>8e</b> .....    | 89  |
| <b>Figure 64.</b> $^{13}\text{C}$ NMR (125 MHz, $\text{DMSO-}d_6$ ) spectra of compound <b>8e</b> ..... | 90  |
| <b>Figure 65.</b> $^1\text{H}$ NMR (400 MHz, $\text{DMSO-}d_6$ ) spectra of compound <b>8f</b> .....    | 91  |
| <b>Figure 66.</b> $^{13}\text{C}$ NMR (100 MHz, $\text{DMSO-}d_6$ ) spectra of compound <b>8f</b> ..... | 92  |
| <b>Figure 67.</b> $^1\text{H}$ NMR (500 MHz, $\text{DMSO-}d_6$ ) spectra of compound <b>8g</b> .....    | 93  |
| <b>Figure 68.</b> $^{13}\text{C}$ NMR (125 MHz, $\text{DMSO-}d_6$ ) spectra of compound <b>8g</b> ..... | 94  |
| <b>Figure 69.</b> $^1\text{H}$ NMR (400 MHz, $\text{DMSO-}d_6$ ) spectra of compound <b>8h</b> .....    | 95  |
| <b>Figure 70.</b> $^{13}\text{C}$ NMR (100 MHz, $\text{DMSO-}d_6$ ) spectra of compound <b>8h</b> ..... | 96  |
| <b>Figure 71.</b> $^1\text{H}$ NMR (400 MHz, $\text{DMSO-}d_6$ ) spectra of compound <b>8i</b> .....    | 97  |
| <b>Figure 72.</b> $^{13}\text{C}$ NMR (100 MHz, $\text{DMSO-}d_6$ ) spectra of compound <b>8i</b> ..... | 98  |
| <b>Figure 73.</b> $^1\text{H}$ NMR (400 MHz, $\text{DMSO-}d_6$ ) spectra of compound <b>8j</b> .....    | 99  |
| <b>Figure 74.</b> $^{13}\text{C}$ NMR (100 MHz, $\text{DMSO-}d_6$ ) spectra of compound <b>8j</b> ..... | 100 |

## General Information

All compounds were fully characterized by spectroscopic data. The NMR spectra were recorded on the Bruker DRX400 or DRX500, chemical shifts ( $\delta$ ) are expressed in ppm, and  $J$  values are given in Hz, DMSO- $d_6$  and  $CDCl_3$  were used as solvent. IR spectra were recorded on a FT-IR Thermo Nicolet Avatar 360 using a KBr pellet. The reactions were monitored by thin-layer chromatography (TLC) using silica gel GF<sub>254</sub>. The melting points were determined on XT-4A melting point apparatus and are uncorrected. HRMs were performed on a Agilent LC/Msd TOF and Monoisotopic Mass instrument. All chemicals and solvents were used as received without further purification unless otherwise stated. Column chromatography was performed on silica gel (200–300 mesh). The raw material **1–3** was synthesized according to the literature.<sup>1</sup>

## General Procedure for the Preparation of $\alpha,\beta$ -Unsaturated Pyrazolone-Based HKAs Derivative **6** via Three-Component Reaction in One-Pot

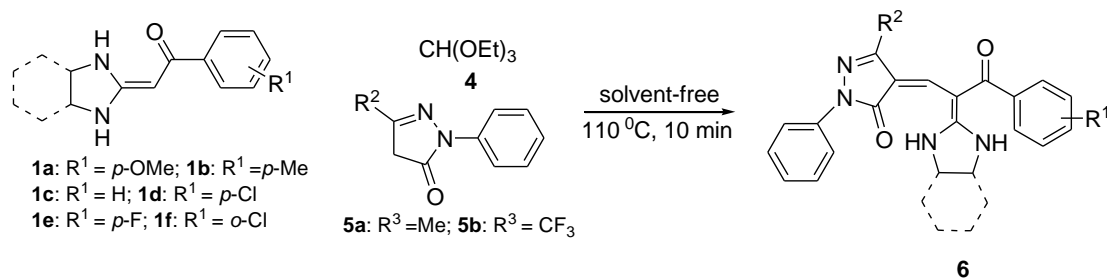

HKAs **1** (1.0 mmol), triethoxy-methane **4** (2.0 mmol) and 1-phenyl-1*H*-pyrazol-5(4*H*)-one derivatives **5** (1.2 mmol) were charged into a 25 mL round-bottom flask and the mixture was heated to 110°C for about 10 minutes and monitored by TLC. Until the substrate HKA has been used up. Then reaction mixture was cooled to room temperature, filtered and washed by 95% EtOH to give pure product with 85–95% yield. The products were further identified by FTIR, NMR and HRMS, being in good agreement with the assigned structures.



### Spectroscopic Data of $\alpha,\beta$ -Unsaturated Pyrazolone-Based HKAs Derivative 6

#### **(Z)-4-(2-(Imidazolidin-2-ylidene)-3-(4-methoxyphenyl)-3-oxopropylidene)-3-methyl-1-phenyl-1H-pyrazol-5(4H)-one (6a)**

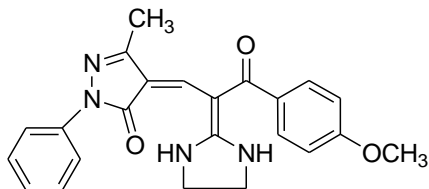

Saffron yellow solid; Mp 204–205.5 °C; IR (KBr): 3307, 2965, 1625, 1593, 1496, 1427, 1392, 1294, 1252, 1176, 1127, 992, 841, 765  $\text{cm}^{-1}$ ;  $^1\text{H}$  NMR (400 MHz, DMSO- $d_6$ ):  $\delta$  = 1.95 (s, 3H, CH<sub>3</sub>), 3.76–3.79 (m, 4H, NCH<sub>2</sub>CH<sub>2</sub>N), 3.78 (s, 3H, OCH<sub>3</sub>), 6.95–6.97 (m, 2H, ArH), 7.00–7.04 (m, 1H, ArH), 7.28–7.32 (m, 2H, ArH), 7.42 (s, 1H, CH), 7.52–7.55 (m, 2H, ArH), 7.89–7.91 (m, 2H, ArH), 9.67 (br, 2H, NH);  $^{13}\text{C}$  NMR (100 MHz, DMSO- $d_6$ ):  $\delta$  = 13.3 (CH<sub>3</sub>), 43.4 (NCH<sub>2</sub>), 43.4 (CH<sub>2</sub>N), 55.3 (OCH<sub>3</sub>), 113.3, 117.9, 122.9, 128.5, 130.8, 130.8 (=CH), 132.7, 139.9, 142.9, 150.4, 161.4 (HNC=), 162.8 (CH<sub>3</sub>OC=), 165.9 (NC=O), 191.8 (C=O); HRMS (EI):  $m/z$  calcd for C<sub>23</sub>H<sub>22</sub>N<sub>4</sub>O<sub>3</sub> [M], 402.1692; found, 402.1690.

#### **(Z)-4-(2-(Imidazolidin-2-ylidene)-3-oxo-3-*p*-tolylpropylidene)-3-methyl-1-phenyl-1H-pyrazol-5(4H)-one (6b)**

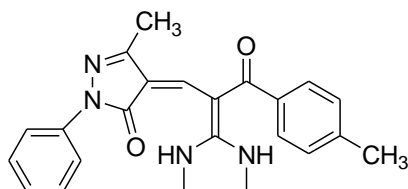

Saffron yellow solid; Mp 238–241 °C; IR (KBr): 3321, 1625, 1593, 1496, 1397, 1257, 1185, 1128, 1048, 990, 763  $\text{cm}^{-1}$ ;  $^1\text{H}$  NMR (500 MHz, DMSO- $d_6$  + HClO<sub>4</sub>):  $\delta$  = 2.26 (s, 3H, CH<sub>3</sub>), 2.33 (s, 3H, CH<sub>3</sub>), 3.82–3.85 (m, 4H, NCH<sub>2</sub>CH<sub>2</sub>N), 7.27–7.29 (m, 3H, CH and ArH), 7.43–7.49 (m, 5H, ArH), 7.59–7.61 (m, 2H, ArH), 9.72 (br, 2H, NH);  $^{13}\text{C}$  NMR (125 MHz, DMSO- $d_6$  + HClO<sub>4</sub>):  $\delta$  = 11.5 (CH<sub>3</sub>), 21.4 (PhCH<sub>3</sub>), 44.4 (NCH<sub>2</sub>), 44.4 (CH<sub>2</sub>N), 100.8, 114.3, 120.9, 126.7, 129.4, 129.5, 129.5 (=CH), 135.2, 135.7, 139.7, 143.3, 150.7, 158.8 (HNC=), 165.7 (NC=O), 191.8 (C=O); HRMS (EI):  $m/z$  calcd for C<sub>23</sub>H<sub>22</sub>N<sub>4</sub>O<sub>2</sub> [M], 386.1743; found, 386.1735.

#### **(Z)-4-(2-(Imidazolidin-2-ylidene)-3-oxo-3-phenylpropylidene)-3-methyl-1-phenyl-1H-pyrazol-5(4H)-one (6c)**

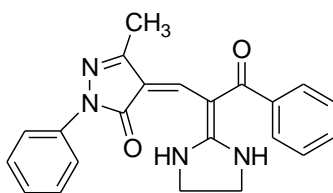

Saffron yellow solid; Mp 231–235 °C; IR (KBr): 3288, 2878, 1623, 1585, 1495, 1428, 1258, 1130, 1037, 994, 751  $\text{cm}^{-1}$ ;  $^1\text{H}$  NMR (400 MHz,  $\text{CDCl}_3$ ):  $\delta$  = 1.84 (s, 3H,  $\text{CH}_3$ ), 3.87–3.90 (m, 4H,  $\text{NCH}_2\text{CH}_2\text{N}$ ), 7.18–7.22 (m, 1H, ArH), 7.42–7.55 (m, 7H, ArH), 7.63 (s, 1H, CH), 7.89–7.92 (m, 2H, ArH), 11.34 (br, 2H, NH);  $^{13}\text{C}$  NMR (100 MHz,  $\text{CDCl}_3$ ):  $\delta$  = 13.2 ( $\text{CH}_3$ ), 43.8 ( $\text{NCH}_2$ ), 43.8 ( $\text{CH}_2\text{N}$ ), 101.5, 106.5, 120.4, 125.0, 128.3, 128.7, 128.7, 130.9, 138.8, 140.8, 147.9, 152.8, 163.5 ( $\text{HNC=}$ ), 165.5 ( $\text{NC=O}$ ), 198.1 ( $\text{C=O}$ ); HRMS (EI):  $m/z$  calcd for  $\text{C}_{22}\text{H}_{20}\text{N}_4\text{O}_2$  [M], 372.1586; found, 372.1590.

**(Z)-4-(3-(4-Chlorophenyl)-2-(imidazolidin-2-ylidene)-3-oxopropylidene)-3-methyl-1-phenyl-1H-pyrazol-5(4H)-one (6d)**

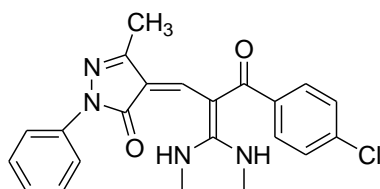

Saffron yellow solid; Mp 233–237 °C; IR (KBr): 3321, 2886, 1631, 1591, 1494, 1428, 1392, 1254, 1182, 1128, 1088, 1044, 993, 823, 763  $\text{cm}^{-1}$ ;  $^1\text{H}$  NMR (400 MHz,  $\text{DMSO}-d_6$ ):  $\delta$  = 2.27 (s, 3H,  $\text{CH}_3$ ), 3.81–3.86 (m, 4H,  $\text{NCH}_2\text{CH}_2\text{N}$ ), 7.23–7.26 (m, 1H, ArH), 7.41–7.45 (m, 4H, ArH), 7.47–7.50 (m, 3H, ArH), 7.52 (s, 1H, CH), 7.67–7.69 (m, 2H, ArH), 9.71 (br, 2H, NH);  $^{13}\text{C}$  NMR (100 MHz,  $\text{DMSO}-d_6$ ):  $\delta$  = 11.2 ( $\text{CH}_3$ ), 44.0 ( $\text{NCH}_2$ ), 44.0 ( $\text{CH}_2\text{N}$ ), 100.9, 112.5, 120.5, 126.2, 128.5, 129.1, 129.2, 130.9, 135.4, 136.5, 137.2, 150.5, 158.6 ( $\text{HNC=}$ ), 165.1 ( $\text{NC=O}$ ), 190.6 ( $\text{C=O}$ ); HRMS (EI):  $m/z$  calcd for  $\text{C}_{22}\text{H}_{19}\text{ClN}_4\text{O}_2$  [M], 406.1197; found, 406.1191.

**(Z)-4-(3-(4-Fluorophenyl)-2-(imidazolidin-2-ylidene)-3-oxopropylidene)-3-methyl-1-phenyl-1H-pyrazol-5(4H)-one (6e)**

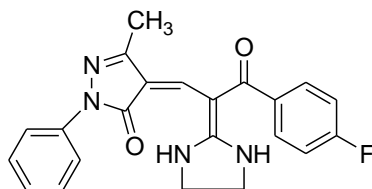

Saffron yellow solid; Mp 202–204 °C; IR (KBr): 3333, 2900, 1626, 1591, 1496, 1429, 1395, 1338, 1254, 1127, 1044, 993, 841, 765  $\text{cm}^{-1}$ ;  $^1\text{H}$  NMR (400 MHz,  $\text{DMSO}-d_6$ ):  $\delta$  = 1.97 (s, 3H,  $\text{CH}_3$ ), 3.74–3.78 (m, 4H,  $\text{NCH}_2\text{CH}_2\text{N}$ ), 6.99–7.03 (m, 1H, ArH), 7.19–7.24 (m, 2H, ArH), 7.27–7.31 (m, 2H, ArH), 7.41 (s, 1H, CH), 7.57–7.61 (m, 2H, ArH), 7.84–7.86 (m, 2H, ArH), 9.49 (br, 2H, NH);  $^{13}\text{C}$  NMR (100 MHz,  $\text{DMSO}-d_6$ ):  $\delta$  = 13.1 ( $\text{CH}_3$ ), 43.4 ( $\text{NCH}_2$ ), 43.4 ( $\text{CH}_2\text{N}$ ), 105.1, 114.8 (d,  $J$  = 21.5 Hz), 117.8, 123.0, 128.5, 131.0, 137.1, 139.8, 142.9, 150.3, 162.1, 162.7 ( $\text{HNC=}$ ), 164.5,

165.8 (NC=O), 191.0 (C=O); HRMS (EI):  $m/z$  calcd for  $C_{22}H_{19}FN_4O_2$  [M], 390.1492; found, 390.1492.

**(Z)-4-(3-(2-Chlorophenyl)-2-(imidazolidin-2-ylidene)-3-oxopropylidene)-3-methyl-1-phenyl-1H-pyrazol-5(4H)-one (6f)**

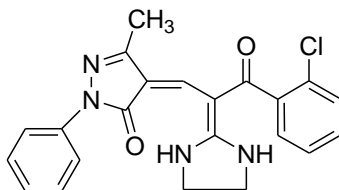

Saffron yellow solid; Mp 204–207 °C; IR (KBr): 3278, 1886, 1625, 1588, 1497, 1434, 1282, 1243, 1133, 1042, 996, 759  $cm^{-1}$ ;  $^1H$  NMR (400 MHz, DMSO- $d_6$ ):  $\delta$  = 1.69 (s, 3H, CH<sub>3</sub>), 3.80–3.83 (m, 4H, NCH<sub>2</sub>CH<sub>2</sub>N), 7.04–7.08 (m, 2H, ArH), 7.31–7.35 (m, 3H, CH and ArH), 7.41–7.48 (m, 2H, ArH), 7.53–7.55 (m, 1H, ArH), 7.88–7.89 (m, 2H, ArH), 10.09 (br, 2H, NH);  $^{13}C$  NMR (100 MHz, DMSO- $d_6$ ):  $\delta$  = 12.6 (CH<sub>3</sub>), 43.4 (NCH<sub>2</sub>), 43.4 (CH<sub>2</sub>N), 101.4, 105.2, 118.3, 123.6, 127.4, 128.6, 128.6, 129.4, 129.5, 130.6, 139.4, 139.9, 144.6, 150.7, 162.7 (HNC=), 164.3 (NC=O), 190.9 (C=O); HRMS (EI):  $m/z$  calcd for  $C_{22}H_{19}ClN_4O_2$  [M], 406.1197; found, 406.1191.

**(Z)-4-(2-(Imidazolidin-2-ylidene)-3-(4-methoxyphenyl)-3-oxopropylidene)-1-phenyl-3-(trifluoromethyl)-1H-pyrazol-5(4H)-one (6g)**

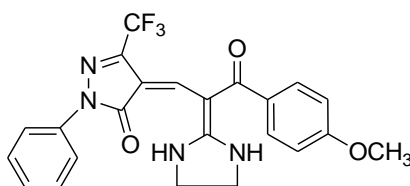

Saffron yellow solid; Mp 227–230 °C; IR (KBr): 3205, 2965, 1640, 1594, 1500, 1414, 1285, 1112, 1033, 982, 837, 761  $cm^{-1}$ ;  $^1H$  NMR (400 MHz, CDCl<sub>3</sub>):  $\delta$  = 3.87 (s, 3H, OCH<sub>3</sub>), 3.90–3.94 (m, 4H, NCH<sub>2</sub>CH<sub>2</sub>N), 6.92–6.95 (m, 2H, ArH), 7.24–7.27 (m, 1H, ArH), 7.42–7.46 (m, 2H, ArH), 7.59–7.62 (m, 2H, ArH), 7.81 (s, 1H, CH), 7.89–7.91 (m, 2H, ArH), 11.18 (br, 2H, NH);  $^{13}C$  NMR (100 MHz, CDCl<sub>3</sub>):  $\delta$  = 44.0 (NCH<sub>2</sub>), 44.0 (CH<sub>2</sub>N), 55.5 (OCH<sub>3</sub>), 99.6, 105.3, 113.6, 119.5, 121.3, 126.0, 128.8, 128.8, 131.7, 131.9, 131.9, 138.5, 146.9, 162.9 (HNC=), 165.5 (NC=O), 197.1 (C=O); HRMS (EI):  $m/z$  calcd for  $C_{23}H_{19}F_3N_4O_3$  [M], 456.1409; found, 456.1407.

**(Z)-4-(2-(Imidazolidin-2-ylidene)-3-oxo-3-p-tolylpropylidene)-1-phenyl-3-(trifluoromethyl)-1H-pyrazol-5(4H)-one (6h)**

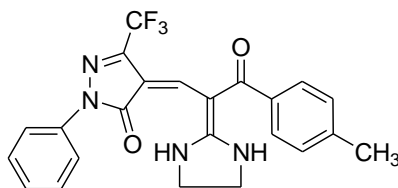

Saffron yellow solid; Mp 207–209 °C; IR (KBr): 3292, 1889, 1634, 1531, 1499, 1441,

1376, 1278, 1180, 1122, 1040, 972, 766  $\text{cm}^{-1}$ ;  $^1\text{H}$  NMR (400 MHz,  $\text{CDCl}_3$ ):  $\delta$  = 2.42 (s, 3H,  $\text{CH}_3$ ), 3.90–3.94 (m, 4H,  $\text{NCH}_2\text{CH}_2\text{N}$ ), 7.23–7.27 (m, 3H, ArH), 7.41–7.49 (m, 4H, ArH), 7.83 (s, 1H, CH), 7.88–7.89 (m, 2H, ArH), 11.18 (br, 2H, NH);  $^{13}\text{C}$  NMR (100 MHz,  $\text{CDCl}_3$ ):  $\delta$  = 21.6 ( $\text{PhCH}_3$ ), 44.0 ( $\text{NCH}_2$ ), 44.0 ( $\text{CH}_2\text{N}$ ), 99.9, 105.3, 119.2, 121.3, 121.9, 126.1, 128.8, 129.0, 129.4, 136.6, 138.4, 142.6, 147.5, 163.0 ( $\text{HNC=}$ ), 165.4 ( $\text{NC=O}$ ), 198.3 ( $\text{C=O}$ ); HRMS (EI):  $m/z$  calcd for  $\text{C}_{23}\text{H}_{19}\text{F}_3\text{N}_4\text{O}_2$  [M], 440.1460; found, 440.1452.

**(Z)-4-(2-(Imidazolidin-2-ylidene)-3-oxo-3-phenylpropylidene)-1-phenyl-3-(trifluoromethyl)-1H-pyrazol-5(4H)-one (6i)**

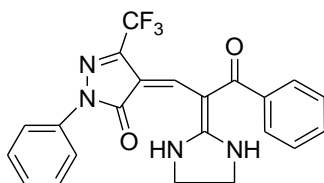

Saffron yellow solid; Mp 233–235  $^{\circ}\text{C}$ ; IR (KBr): 3288, 2886, 1632, 1523, 1499, 1437, 1370, 1272, 1183, 1121, 968, 758  $\text{cm}^{-1}$ ;  $^1\text{H}$  NMR (400 MHz,  $\text{CDCl}_3$ ):  $\delta$  = 3.91–3.95 (m, 4H,  $\text{NCH}_2\text{CH}_2\text{N}$ ), 7.24–7.28 (m, 1H, ArH), 7.41–7.47 (m, 4H, ArH), 7.52–7.56 (m, 3H, ArH), 7.82 (s, 1H, CH), 7.87–7.89 (m, 2H, ArH), 11.19 (br, 2H, NH);  $^{13}\text{C}$  NMR (100 MHz,  $\text{CDCl}_3$ ):  $\delta$  = 43.9 ( $\text{NCH}_2$ ), 43.9 ( $\text{CH}_2\text{N}$ ), 100.2, 105.0, 119.1, 121.3, 121.8, 126.1, 128.4, 128.8, 128.9, 131.6, 138.4, 139.6, 147.8, 163.5 ( $\text{HNC=}$ ), 165.3 ( $\text{NC=O}$ ); HRMS (EI):  $m/z$  calcd for  $\text{C}_{22}\text{H}_{17}\text{F}_3\text{N}_4\text{O}_2$  [M], 426.1304; found, 426.1296.

**(Z)-4-(3-(4-Chlorophenyl)-2-(imidazolidin-2-ylidene)-3-oxopropylidene)-1-phenyl-3-(trifluoromethyl)-1H-pyrazol-5(4H)-one (6j)**

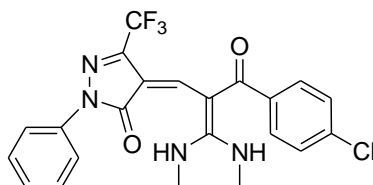

Saffron yellow solid; Mp 230–233  $^{\circ}\text{C}$ ; IR (KBr): 3221, 2969, 1640, 1583, 1499, 1403, 1282, 1176, 1114, 982, 836, 757  $\text{cm}^{-1}$ ;  $^1\text{H}$  NMR (400 MHz,  $\text{DMSO-}d_6$ ):  $\delta$  = 3.80–3.87 (m, 4H,  $\text{NCH}_2\text{CH}_2\text{N}$ ), 7.14 (m, 1H, ArH), 7.37 (m, 3H, ArH), 7.54 (m, 4H, CH and ArH), 7.89 (m, 2H, ArH), 9.59 (br, 2H, NH);  $^{13}\text{C}$  NMR (100 MHz,  $\text{DMSO-}d_6$ ):  $\delta$  = 43.7 ( $\text{NCH}_2$ ), 43.7 ( $\text{CH}_2\text{N}$ ), 106.3, 118.9, 120.0, 122.7, 124.4, 125.4, 128.4, 128.7, 130.2, 135.9, 137.9, 139.3, 141.1, 161.7 ( $\text{HNC=}$ ), 166.3 ( $\text{NC=O}$ ), 190.3 ( $\text{C=O}$ ); HRMS (EI):  $m/z$  calcd for  $\text{C}_{22}\text{H}_{16}\text{ClF}_3\text{N}_4\text{O}_2$  [M], 460.0914; found, 460.0915.

**(Z)-4-(3-(4-Fluorophenyl)-2-(imidazolidin-2-ylidene)-3-oxopropylidene)-1-phenyl-3-(trifluoromethyl)-1H-pyrazol-5(4H)-one (6k)**

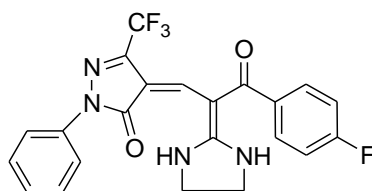

Saffron yellow solid; Mp 237–240 °C; IR (KBr): 3305, 2900, 1633, 1606, 1523, 1500, 1442, 1377, 1274, 1236, 1184, 1123, 1044, 972, 841, 765  $\text{cm}^{-1}$ ;  $^1\text{H}$  NMR (400 MHz,  $\text{DMSO-}d_6$ ):  $\delta$  = 3.82–3.87 (m, 4H,  $\text{NCH}_2\text{CH}_2\text{N}$ ), 7.12–7.14 (m, 1H, ArH), 7.28–7.40 (m, 5H, CH and ArH), 7.57–7.62 (m, 2H, ArH), 7.88–7.94 (m, 2H, ArH), 9.61 (br, 2H, NH);  $^{13}\text{C}$  NMR (100 MHz,  $\text{DMSO-}d_6$ ):  $\delta$  = 43.7 ( $\text{NCH}_2$ ), 43.7 ( $\text{CH}_2\text{N}$ ), 96.7, 106.5, 115.3 (d,  $J$  = 23.6 Hz), 118.9, 120.1, 122.8, 124.4, 128.7, 131.1, 135.7, 139.4, 141.1, 161.7, 162 ( $\text{HNC=}$ ), 166.5 ( $\text{NC=O}$ ), 190.4 ( $\text{C=O}$ ); HRMS (EI):  $m/z$  calcd for  $\text{C}_{22}\text{H}_{16}\text{F}_4\text{N}_4\text{O}_2$  [M], 444.1209; found, 444.1212.

**(Z)-4-(3-(2-Chlorophenyl)-2-(imidazolidin-2-ylidene)-3-oxopropylidene)-1-phenyl-3-(trifluoromethyl)-1H-pyrazol-5(4H)-one (6l)**

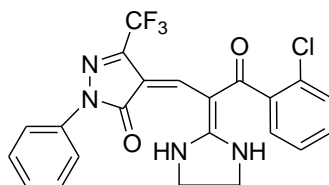

Saffron yellow solid; Mp 224–226 °C; IR (KBr): 3316, 2893, 1633, 1591, 1431, 1377, 1289, 1249, 1184, 1114, 1044, 971, 826, 757  $\text{cm}^{-1}$ ;  $^1\text{H}$  NMR (400 MHz,  $\text{DMSO-}d_6$ ):  $\delta$  = 3.86–3.90 (m, 4H,  $\text{NCH}_2\text{CH}_2\text{N}$ ), 7.10 (s, 1H, CH), 7.11–7.15 (m, 1H, ArH), 7.32–7.40 (m, 3H, ArH), 7.44–7.49 (m, 2H, ArH), 7.54–7.56 (m, 1H, ArH), 7.87–7.89 (m, 2H, ArH), 9.64 (br, 2H, NH);  $^{13}\text{C}$  NMR (100 MHz,  $\text{DMSO-}d_6$ ):  $\delta$  = 43.7 ( $\text{NCH}_2$ ), 43.7 ( $\text{CH}_2\text{N}$ ), 97.2, 106.9, 119.0, 119.8, 122.5, 124.5, 127.3, 128.6, 128.7, 129.6, 130.9, 138.8, 139.3, 142.2, 161.7 ( $\text{HNC=}$ ), 165.2 ( $\text{NC=O}$ ), 190.1 ( $\text{C=O}$ ); HRMS (EI):  $m/z$  calcd for  $\text{C}_{22}\text{H}_{16}\text{ClF}_3\text{N}_4\text{O}_2$  [M], 460.0914; found, 460.0912.

**(Z)-4-(2-(1H-benzo[d]imidazol-2(3H,3aH,4H,5H,6H,7H,7aH)-ylidene)-3-(4-methoxyphenyl)-3-oxopropylidene)-3-methyl-1-phenyl-1H-pyrazol-5(4H)-one (6m)**

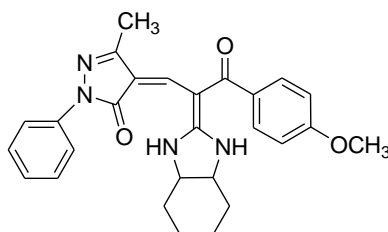

Saffron yellow solid; Mp 206–207.5 °C; IR (KBr): 3264, 2933, 1617, 1583, 1500, 1444, 1388, 1349, 1257, 1171, 1138, 1095, 779  $\text{cm}^{-1}$ ;  $^1\text{H}$  NMR (400 MHz,  $\text{DMSO-}d_6$ ):  $\delta$  = 1.27–1.30 (m, 2H,  $\text{CH}_2$ ), 1.45–1.49 (m, 2H,  $\text{CH}_2$ ), 1.71–1.75 (m, 2H,  $\text{CH}_2$ ), 2.06–2.11 (m, 2H,  $\text{CH}_2$ ), 2.28 (s, 3H,  $\text{CH}_3$ ), 3.42–3.46 (m, 2H,  $\text{NCHCHN}$ ), 3.82 (s, 3H,  $\text{OCH}_3$ ), 6.96–6.99 (m, 2H, ArH), 7.22–7.26 (m, 1H, ArH), 7.39–7.47 (m, 4H,

ArH), 7.51 (s, 1H, CH), 7.67–7.69 (m, 2H, ArH), 9.99 (br, 2H, NH);  $^{13}\text{C}$  NMR (100 MHz, DMSO- $d_6$ ):  $\delta$  = 11.2 (CH<sub>3</sub>), 23.4 (NCHCH<sub>2</sub>CH<sub>2</sub>), 23.4 (CH<sub>2</sub>CH<sub>2</sub>CHN), 28.3 (NCHCH<sub>2</sub>), 28.3 (CH<sub>2</sub>CHN), 55.5 (NCH), 55.5 (CHN), 64.1, 100.9, 113.7, 120.5, 121.4, 126.2, 129.1, 129.3, 130.3, 131.5, 135.4, 150.4, 158.5, 162.8 (HNC=), 166.9 (NC=O), 190.5 (C=O); HRMS (EI):  $m/z$  calcd for C<sub>27</sub>H<sub>28</sub>N<sub>4</sub>O<sub>3</sub> [M], 456.2161; found, 456.2157.

**(Z)-4-(2-(1H-benzo[d]imidazol-2(3H,3aH,4H,5H,6H,7H,7aH)-ylidene)-3-(2-chlorophenyl)-3-oxopropylidene)-3-methyl-1-phenyl-1H-pyrazol-5(4H)-one (6n)**

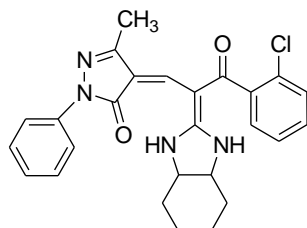

Saffron yellow solid; Mp 204–207.5 °C; IR (KBr): 3283, 2933, 1624, 1583, 1537, 1494, 1437, 1396, 1367, 1277, 1137, 756 cm<sup>-1</sup>;  $^1\text{H}$  NMR (400 MHz, DMSO- $d_6$ ):  $\delta$  = 1.31–1.34 (m, 2H, CH<sub>2</sub>), 1.38–1.39 (m, 2H, CH<sub>2</sub>), 1.57 (m, 2H, CH<sub>2</sub>), 1.69 (s, 3H, CH<sub>3</sub>), 1.73 (m, 2H, CH<sub>2</sub>), 4.11 (m, 2H, NCHCHN), 7.04–7.09 (m, 2H, ArH), 7.31–7.36 (m, 2H, ArH), 7.38 (s, 1H, CH), 7.41–7.47 (m, 2H, ArH), 7.52–7.54 (m, 1H, ArH), 7.86–7.88 (m, 2H, ArH), 10.06 (br, 2H, NH);  $^{13}\text{C}$  NMR (100 MHz, DMSO- $d_6$ ):  $\delta$  = 12.6 (CH<sub>3</sub>), 19.3 (NCHCH<sub>2</sub>CH<sub>2</sub>), 19.3 (CH<sub>2</sub>CH<sub>2</sub>CHN), 25.8 (NCHCH<sub>2</sub>), 25.8 (CH<sub>2</sub>CHN), 54.3 (NCH), 54.3 (CHN), 101.6, 105.4, 118.2, 123.6, 127.4, 128.6, 128.7, 129.4, 129.5, 130.5, 139.4, 140.0, 144.1, 150.7, 162.7 (HNC=), 164.2 (NC=O), 191.0 (C=O); HRMS (EI):  $m/z$  calcd for C<sub>26</sub>H<sub>25</sub>ClN<sub>4</sub>O<sub>2</sub> [M], 460.1666; found, 460.1679.

**General Procedure for the Preparation of  $\alpha,\beta$ -Unsaturated Pyrazolone-Based  
HKAs Derivative 7–8 via Three-Component Reaction in One-Pot**

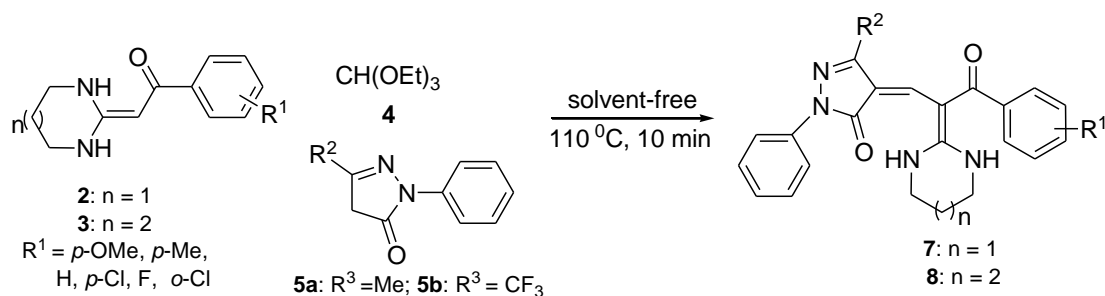

HKAs 2–3 (1.0 mmol), triethoxy-methane 4 (2.0 mmol) and 1-phenyl-1H-pyrazol-5(4H)-one derivatives 5 (1.2 mmol) were charged into a 25 mL round-bottom flask and the mixture was heated to 110 °C for about 10 minutes and monitored by TLC. Until the substrate HKA has been used up. Then reaction mixture was cooled to room temperature, filtered and washed by 95% EtOH to give pure product with 89–96% yield. The products were further identified by FTIR, NMR and HRMS, being in good agreement with the assigned structures.

**(Z)-4-(3-(4-Methoxyphenyl)-3-oxo-2-(tetrahydropyrimidin-2(1H)-ylidene)propylidene)-3-methyl-1-phenyl-1H-pyrazol-5(4H)-one (7a)**

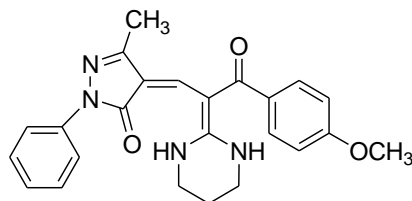

Saffron yellow solid; Mp 224–229 °C; IR (KBr): 3263, 2962, 1635, 1597, 1500, 1461, 1359, 1309, 1265, 1166, 1030, 997, 837, 754 cm<sup>-1</sup>; <sup>1</sup>H NMR (500 MHz, DMSO-*d*<sub>6</sub>):  $\delta$  = 1.99 (s, 3H, CH<sub>3</sub>), 1.97–2.06 (m, 2H, CH<sub>2</sub>), 3.39–3.43 (m, 4H, NCH<sub>2</sub>CH<sub>2</sub>N), 3.84 (s, 3H, OCH<sub>3</sub>), 6.99–7.04 (m, 3H, ArH), 7.27 (s, 1H, CH), 7.31–7.34 (m, 2H, ArH), 7.53–7.55 (m, 2H, ArH), 8.03–8.04 (m, 2H, ArH), 9.03 (br, 2H, NH); <sup>13</sup>C NMR (125 MHz, DMSO-*d*<sub>6</sub>):  $\delta$  = 13.6 (CH<sub>3</sub>), 17.8 (CH<sub>2</sub>), 38.2 (NCH<sub>2</sub>), 38.2 (CH<sub>2</sub>N), 55.7 (OCH<sub>3</sub>), 101.1, 109.9, 113.6, 117.7, 122.4, 128.7, 130.7, 133.2, 141.0, 141.3, 150.0, 161.3, 161.8 (HNC=), 163.3 (NC=O), 189.8 (C=O); HRMS (EI): *m/z* calcd for C<sub>24</sub>H<sub>24</sub>N<sub>4</sub>O<sub>3</sub> [M], 416.1848; found, 416.1855.

**(Z)-3-Methyl-4-(3-oxo-2-(tetrahydropyrimidin-2(1H)-ylidene)-3-*p*-tolylpropylidene)-1-phenyl-1H-pyrazol-5(4H)-one (7b)**



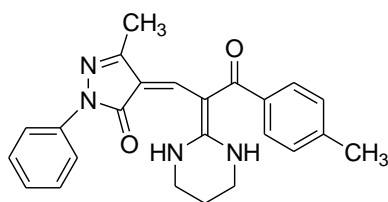

Saffron yellow solid; Mp 249–252 °C; IR (KBr): 3266, 2958, 1635, 1502, 1439, 1352, 1274, 1204, 1142, 1069, 997, 794, 754  $\text{cm}^{-1}$ ;  $^1\text{H}$  NMR (400 MHz,  $\text{DMSO-}d_6$ ):  $\delta$  = 1.93 (s, 3H,  $\text{CH}_3$ ), 1.96–1.98 (m, 2H,  $\text{CH}_2$ ), 2.35 (s, 3H,  $\text{ArCH}_3$ ), 3.29–3.33 (m, 4H,  $\text{NCH}_2\text{CH}_2\text{N}$ ), 6.96–6.99 (m, 1H,  $\text{ArH}$ ), 7.22–7.31 (m, 5H,  $\text{CH}$  and  $\text{ArH}$ ), 7.39–7.42 (m, 2H,  $\text{ArH}$ ), 7.96–7.98 (m, 2H,  $\text{ArH}$ ), 9.00 (br, 2H,  $\text{NH}$ );  $^{13}\text{C}$  NMR (100 MHz,  $\text{DMSO-}d_6$ ):  $\delta$  = 13.2 ( $\text{CH}_3$ ), 17.4 ( $\text{CH}_2$ ), 21.1 ( $\text{PhCH}_3$ ), 37.8 ( $\text{NCH}_2$ ), 37.8 ( $\text{CH}_2\text{N}$ ), 100.9, 109.6, 117.4, 122.2, 128.4, 128.4, 128.5, 137.7, 140.2, 140.5, 141.2, 149.7, 161.2 ( $\text{HNC=}$ ), 162.8 ( $\text{NC=O}$ ), 190.3 ( $\text{C=O}$ ); HRMS (EI):  $m/z$  calcd for  $\text{C}_{24}\text{H}_{24}\text{N}_4\text{O}_2$  [M], 400.1899; found, 400.1906.

**(Z)-3-Methyl-4-(3-oxo-3-phenyl-2-(tetrahydropyrimidin-2(1H)-ylidene)propylidene)-1-phenyl-1H-pyrazol-5(4H)-one (7c)**

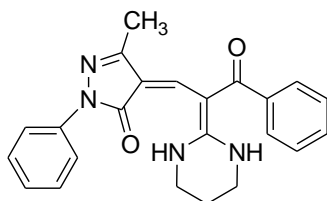

Saffron yellow solid; Mp 257–262 °C; IR (KBr): 3256, 3016, 1632, 1594, 1500, 1442, 1381, 1310, 1269, 1204, 1138, 1066, 990, 946, 758  $\text{cm}^{-1}$ ;  $^1\text{H}$  NMR (400 MHz,  $\text{DMSO-}d_6$ ):  $\delta$  = 1.92 (s, 3H,  $\text{CH}_3$ ), 1.95–1.98 (m, 2H,  $\text{CH}_2$ ), 3.30–3.36 (m, 4H,  $\text{NCH}_2\text{CH}_2\text{N}$ ), 6.96–6.99 (m, 1H,  $\text{ArH}$ ), 7.21 (s, 1H,  $\text{CH}$ ), 7.27–7.31 (m, 2H,  $\text{ArH}$ ), 7.43–7.49 (m, 5H,  $\text{ArH}$ ), 7.98–8.00 (m, 2H,  $\text{ArH}$ ), 9.04 (br, 2H,  $\text{NH}$ );  $^{13}\text{C}$  NMR (100 MHz,  $\text{DMSO-}d_6$ ):  $\delta$  = 13.1 ( $\text{CH}_3$ ), 17.4 ( $\text{CH}_2$ ), 37.8 ( $\text{NCH}_2$ ), 37.8 ( $\text{CH}_2\text{N}$ ), 101.1, 109.4, 117.3, 122.2, 127.9, 128.0, 128.4, 130.1, 140.6, 140.7, 141.2, 149.6, 161.2 ( $\text{HNC=}$ ), 162.8 ( $\text{NC=O}$ ), 190.3 ( $\text{C=O}$ ); HRMS (EI):  $m/z$  calcd for  $\text{C}_{23}\text{H}_{22}\text{N}_4\text{O}_2$  [M], 386.1743; found, 386.1742.

**(Z)-4-(3-(4-Chlorophenyl)-3-oxo-2-(tetrahydropyrimidin-2(1H)-ylidene)propylidene)-3-methyl-1-phenyl-1H-pyrazol-5(4H)-one (7d)**

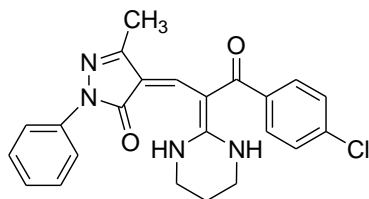

Saffron yellow solid; Mp 265–269 °C; IR (KBr): 3270, 2973, 1634, 1497, 1359, 1271, 1200, 1146, 1088, 997, 834, 747  $\text{cm}^{-1}$ ;  $^1\text{H}$  NMR (400 MHz,  $\text{DMSO-}d_6$ ):  $\delta$  = 1.94–1.98 (m, 5H,  $\text{CH}_3$  and  $\text{CH}_2$ ), 3.30–3.37 (m, 4H,  $\text{NCH}_2\text{CH}_2\text{N}$ ), 6.96–7.00 (m, 1H,  $\text{ArH}$ ),

7.21 (s, 1H, CH), 7.27–7.31 (m, 2H, ArH), 7.48–7.54 (m, 4H, ArH), 7.98–7.99 (m, 2H, ArH), 9.05 (br, 2H, NH);  $^{13}\text{C}$  NMR (100 MHz, DMSO- $d_6$ ):  $\delta$  = 13.2 (CH<sub>3</sub>), 17.4 (CH<sub>2</sub>), 37.8 (NCH<sub>2</sub>), 37.8 (CH<sub>2</sub>N), 101.7, 108.9, 117.3, 122.2, 128.1, 128.4, 129.9, 134.7, 139.5, 140.5, 141.0, 149.8, 161.1 (HNC=), 162.8 (NC=O), 188.6 (C=O); HRMS (EI):  $m/z$  calcd for C<sub>23</sub>H<sub>21</sub>ClN<sub>4</sub>O<sub>2</sub> [M], 420.1353; found, 420.1354.

**(Z)-4-(3-(4-Fluorophenyl)-3-oxo-2-(tetrahydropyrimidin-2(1H)-ylidene)propylidene)-3-methyl-1-phenyl-1H-pyrazol-5(4H)-one (7e)**

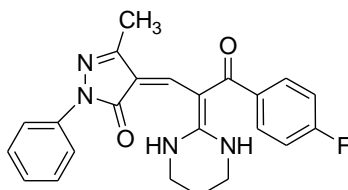

Saffron yellow solid; Mp 263–266 °C; IR (KBr): 3266, 2969, 1635, 1598, 1497, 1359, 1268, 1147, 1073, 997, 845, 754 cm<sup>-1</sup>;  $^1\text{H}$  NMR (400 MHz, DMSO- $d_6$ ):  $\delta$  = 1.93–1.96 (m, 5H, CH<sub>2</sub> and CH<sub>3</sub>), 3.28–3.34 (m, 4H, NCH<sub>2</sub>CH<sub>2</sub>N), 6.96–7.00 (m, 2H, ArH), 7.20 (s, 1H, CH), 7.26–7.31 (m, 4H, ArH), 7.53–7.56 (m, 2H, ArH), 7.96–7.98 (m, 2H, ArH), 9.03 (br, 2H, NH);  $^{13}\text{C}$  NMR (100 MHz, DMSO- $d_6$ ):  $\delta$  = 13.1 (CH<sub>3</sub>), 17.4 (CH<sub>2</sub>), 37.8 (NCH<sub>2</sub>), 37.8 (CH<sub>2</sub>N), 101.4, 109.1, 114.9 (d,  $J$  = 21.5 Hz), 117.4, 122.3, 128.4, 130.5, 137.1, 140.4, 141.1, 149.8, 161.1 (HNC=), 162.8 (NC=O), 163.0 (d,  $J$  = 245.9 Hz), 188.9 (C=O); HRMS (EI):  $m/z$  calcd for C<sub>23</sub>H<sub>21</sub>FN<sub>4</sub>O<sub>2</sub> [M], 404.1649; found, 404.1641.

**(Z)-4-(3-(2-Chlorophenyl)-3-oxo-2-(tetrahydropyrimidin-2(1H)-ylidene)propylidene)-3-methyl-1-phenyl-1H-pyrazol-5(4H)-one (7f)**

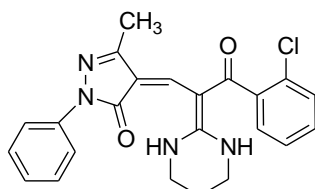

Saffron yellow solid; Mp 252–254.5 °C; IR (KBr): 3299, 2969, 1634, 1584, 1502, 1436, 1356, 1283, 1200, 1149, 1088, 993, 750 cm<sup>-1</sup>;  $^1\text{H}$  NMR (500 MHz, DMSO- $d_6$ ):  $\delta$  = 1.83 (s, 3H, CH<sub>3</sub>), 1.98–2.04 (m, 2H, CH<sub>2</sub>), 3.36–3.44 (m, 4H, NCH<sub>2</sub>CH<sub>2</sub>N), 6.88 (s, 1H, ACH), 6.99–7.03 (m, 1H, ArH), 7.31–7.36 (m, 3H, ArH), 7.42–7.47 (m, 2H, CH and ArH), 7.53–7.54 (m, 1H, ArH), 8.00–8.02 (m, 2H, ArH), 9.05 (br, 2H, NH);  $^{13}\text{C}$  NMR (125 MHz, DMSO- $d_6$ ):  $\delta$  = 13.1 (CH<sub>3</sub>), 17.8 (CH<sub>2</sub>), 38.3 (NCH<sub>2</sub>), 38.3 (CH<sub>2</sub>N), 102.1, 109.9, 117.7, 122.7, 127.2, 128.7, 129.3, 129.8, 130.1, 130.5, 140.5, 140.8, 141.8, 149.7, 160.5 (HNC=), 163.2 (NC=O), 188.6 (C=O); HRMS (EI):  $m/z$  calcd for C<sub>23</sub>H<sub>21</sub>ClN<sub>4</sub>O<sub>2</sub> [M], 420.1353; found, 420.1348.

**(Z)-4-(3-(4-Methoxyphenyl)-3-oxo-2-(tetrahydropyrimidin-2(1H)-ylidene)propylidene)-1-phenyl-3-(trifluoromethyl)-1H-pyrazol-5(4H)-one (7g)**

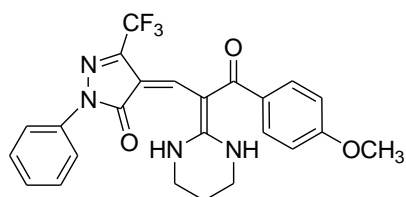

Saffron yellow solid; Mp 291–293 °C; IR (KBr): 3278, 2965, 1641, 1595, 1501, 1465, 1292, 1258, 1172, 1113, 1069, 975, 838, 761  $\text{cm}^{-1}$ ;  $^1\text{H}$  NMR (400 MHz,  $\text{DMSO-}d_6$ ):  $\delta$  = 1.99–2.01 (m, 2H,  $\text{CH}_2$ ), 3.33–3.37 (m, 4H,  $\text{NCH}_2\text{CH}_2\text{N}$ ), 3.81 (s, 3H,  $\text{OCH}_3$ ), 7.01–7.03 (m, 2H, ArH), 7.11–7.14 (m, 1H, ArH), 7.33–7.37 (m, 2H, ArH), 7.39 (s, 1H, CH), 7.52–7.54 (m, 2H, ArH), 7.94–7.96 (m, 2H, ArH), 9.19 (br, 2H, NH);  $^{13}\text{C}$  NMR (100 MHz,  $\text{DMSO-}d_6$ ):  $\delta$  = 17.3 ( $\text{CH}_2$ ), 37.8 ( $\text{NCH}_2$ ), 37.8 ( $\text{CH}_2\text{N}$ ), 55.4 ( $\text{OCH}_3$ ), 95.0, 113.4, 114.3, 118.8, 121.6 (d,  $J$  = 268.7 Hz), 124.1, 128.7, 130.7, 139.0, 139.2, 139.6, 139.7, 160.3, 161.5 ( $\text{HNC=}$ ), 161.8 ( $\text{NC=O}$ ), 190.9 ( $\text{C=O}$ ); HRMS (EI):  $m/z$  calcd for  $\text{C}_{24}\text{H}_{21}\text{F}_3\text{N}_4\text{O}_3$  [M], 470.1566; found, 470.1566.

**(Z)-4-(3-Oxo-2-(tetrahydropyrimidin-2(1H)-ylidene)-3-*p*-tolylpropylidene)-1-phenyl-3-(trifluoromethyl)-1H-pyrazol-5(4H)-one (7h)**

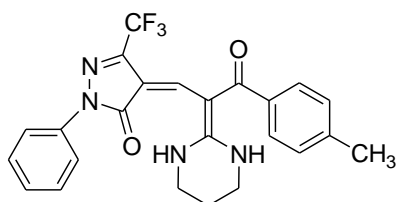

Saffron yellow solid; Mp 296–298 °C; IR (KBr): 3299, 3013, 1640, 1595, 1499, 1454, 1288, 1179, 1115, 1066, 979, 830, 750  $\text{cm}^{-1}$ ;  $^1\text{H}$  NMR (400 MHz,  $\text{DMSO-}d_6$ ):  $\delta$  = 1.97–2.01 (m, 2H,  $\text{CH}_2$ ), 2.36 (s, 3H,  $\text{ArCH}_3$ ), 3.33–3.37 (m, 4H,  $\text{NCH}_2\text{CH}_2\text{N}$ ), 7.11–7.14 (m, 1H, ArH), 7.27–7.29 (m, 2H, ArH), 7.34–7.38 (m, 2H, ArH), 7.39 (s, 1H, ArH), 7.43–7.45 (m, 2H, ArH), 7.94–7.96 (m, 2H, ArH), 9.21 (br, 2H, NH);  $^{13}\text{C}$  NMR (100 MHz,  $\text{DMSO-}d_6$ ):  $\delta$  = 17.3 ( $\text{CH}_2$ ), 21.1 ( $\text{PhCH}_3$ ), 37.8 ( $\text{NCH}_2$ ), 37.8 ( $\text{CH}_2\text{N}$ ), 95.1, 114.2, 118.8, 120.2, 122.9, 124.1, 128.5, 128.7, 136.5, 139.3, 139.4, 139.6, 140.9, 160.2 ( $\text{HNC=}$ ), 161.8 ( $\text{NC=O}$ ), 191.7 ( $\text{C=O}$ ); HRMS (EI):  $m/z$  calcd for  $\text{C}_{24}\text{H}_{21}\text{F}_3\text{N}_4\text{O}_2$  [M], 454.1617; found, 454.1613.

**(Z)-4-(3-Oxo-3-phenyl-2-(tetrahydropyrimidin-2(1H)-ylidene)propylidene)-1-phenyl-3-(trifluoromethyl)-1H-pyrazol-5(4H)-one (7i)**

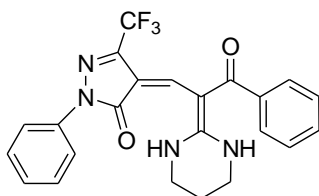

Saffron yellow solid; Mp 276–285 °C; IR (KBr): 3297, 3013, 1640, 1591, 1500, 1288, 1182, 1118, 1073, 986, 834, 696  $\text{cm}^{-1}$ ;  $^1\text{H}$  NMR (400 MHz,  $\text{DMSO-}d_6$ ):  $\delta$  = 1.97–2.01 (m, 2H,  $\text{CH}_2$ ), 3.33–3.37 (m, 4H,  $\text{NCH}_2\text{CH}_2\text{N}$ ), 7.11–7.15 (m, 1H, ArH), 7.32 (s, 1H, CH), 7.36–7.39 (m, 2H, ArH), 7.45–7.55 (m, 5H, ArH), 7.93–7.95 (m, 2H, ArH), 9.23

(br, 2H, NH);  $^{13}\text{C}$  NMR (100 MHz, DMSO- $d_6$ ):  $\delta$  = 17.3 ( $\text{CH}_2$ ), 37.8 ( $\text{NCH}_2$ ), 37.8 ( $\text{CH}_2\text{N}$ ), 95.3, 114.1, 118.8, 120.2, 122.9, 124.2, 128.1, 128.2, 128.7, 130.8, 139.3, 139.4, 139.7, 160.1 ( $\text{HNC=}$ ), 161.8 ( $\text{NC=O}$ ), 192.0 ( $\text{C=O}$ ); HRMS (EI $^+$ ):  $m/z$  calcd for  $\text{C}_{23}\text{H}_{19}\text{F}_3\text{N}_4\text{O}_2$  [M], 440.1460; found, 440.1457.

**(Z)-4-(3-(4-Chlorophenyl)-3-oxo-2-(tetrahydropyrimidin-2(1H)-ylidene)propylidene)-1-phenyl-3-(trifluoromethyl)-1H-pyrazol-5(4H)-one (7j)**

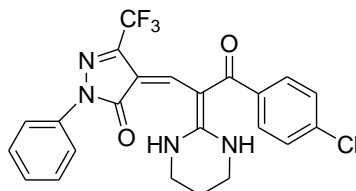

Saffron yellow solid; Mp >300 °C; IR (KBr): 3027, 2581, 1640, 1600, 1499, 1465, 1398, 1291, 1181, 1116, 982, 834, 756  $\text{cm}^{-1}$ ;  $^1\text{H}$  NMR (400 MHz, DMSO- $d_6$ ):  $\delta$  = 1.96–1.98 (m, 2H,  $\text{CH}_2$ ), 3.32–3.35 (m, 4H,  $\text{NCH}_2\text{CH}_2\text{N}$ ), 7.11–7.15 (m, 1H, ArH), 7.29 (s, 1H, CH), 7.38–7.39 (m, 2H, ArH), 7.50–7.57 (m, 4H, ArH), 7.91–7.93 (m, 2H, ArH), 9.24 (br, 2H, NH);  $^{13}\text{C}$  NMR (100 MHz, DMSO- $d_6$ ):  $\delta$  = 17.2 ( $\text{CH}_2$ ), 37.8 ( $\text{NCH}_2$ ), 37.8 ( $\text{CH}_2\text{N}$ ), 95.6, 113.6, 118.8, 121.5, 123.0, 124.2, 128.3, 128.7, 130.0, 135.5, 138.2, 139.6, 159.9 ( $\text{HNC=}$ ), 161.7 ( $\text{NC=O}$ ), 190.5 ( $\text{C=O}$ ); HRMS (EI):  $m/z$  calcd for  $\text{C}_{23}\text{H}_{18}\text{ClF}_3\text{N}_4\text{O}_2$  [M], 474.1070; found, 474.1073.

**(Z)-4-(3-(4-Fluorophenyl)-3-oxo-2-(tetrahydropyrimidin-2(1H)-ylidene)propylidene)-1-phenyl-3-(trifluoromethyl)-1H-pyrazol-5(4H)-one (7k)**

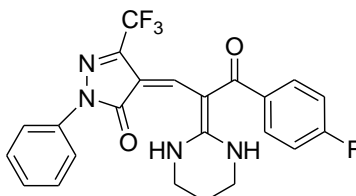

Saffron yellow solid; Mp 284–288.5 °C; IR (KBr): 3263, 3016, 1641, 1595, 1500, 1457, 1399, 1290, 1174, 1116, 1069, 979, 754  $\text{cm}^{-1}$ ;  $^1\text{H}$  NMR (400 MHz, DMSO- $d_6$ ):  $\delta$  = 1.97–2.02 (m, 2H,  $\text{CH}_2$ ), 3.33–3.36 (m, 4H,  $\text{NCH}_2\text{CH}_2\text{N}$ ), 7.11–7.15 (m, 1H, ArH), 7.27–7.31 (m, 2H, CH and ArH), 7.32–7.40 (m, 3H, ArH), 7.56–7.60 (m, 2H, ArH), 7.93–7.95 (m, 2H, ArH), 9.24 (br, 2H, NH);  $^{13}\text{C}$  NMR (100 MHz, DMSO- $d_6$ ):  $\delta$  = 17.3 ( $\text{CH}_2$ ), 37.8 ( $\text{NCH}_2$ ), 37.8 ( $\text{CH}_2\text{N}$ ), 95.4, 113.8, 115.1, 115.3, 118.8, 121.5 (d,  $J$  = 268.7 Hz), 124.2, 128.7, 130.8, 130.9, 135.9, 139.6, 160.1 ( $\text{HNC=}$ ), 161.8 ( $\text{NC=O}$ ), 163.4 (d,  $J$  = 247.0 Hz), 190.6 ( $\text{C=O}$ ); HRMS (EI):  $m/z$  calcd for  $\text{C}_{23}\text{H}_{18}\text{F}_4\text{N}_4\text{O}_2$  [M], 458.1366; found, 458.1356.

**(Z)-4-(3-(2-Chlorophenyl)-3-oxo-2-(tetrahydropyrimidin-2(1H)-ylidene)propylidene)-1-phenyl-3-(trifluoromethyl)-1H-pyrazol-5(4H)-one (7l)**

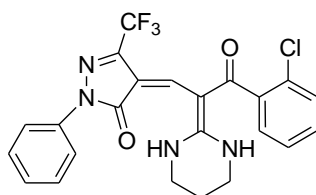

Saffron yellow solid; Mp 283–287 °C; IR (KBr): 3322, 3009, 1641, 1594, 1541, 1504, 1297, 1185, 1119, 1037, 979  $\text{cm}^{-1}$ ;  $^1\text{H}$  NMR (400 MHz,  $\text{DMSO-}d_6$ ):  $\delta$  = 1.97–2.02 (m, 2H,  $\text{CH}_2$ ), 3.35–3.39 (m, 4H,  $\text{NCH}_2\text{CH}_2\text{N}$ ), 6.97–7.00 (s, 1H, CH), 7.13–7.15 (m, 1H, ArH), 7.32–7.39 (m, 3H, ArH), 7.43–7.49 (m, 2H, ArH), 7.52–7.54 (m, 1H, ArH), 7.89–7.92 (m, 2H, ArH), 9.23 (br, 2H, NH);  $^{13}\text{C}$  NMR (100 MHz,  $\text{DMSO-}d_6$ ):  $\delta$  = 17.3 ( $\text{CH}_2$ ), 37.8 ( $\text{NCH}_2$ ), 37.8 ( $\text{CH}_2\text{N}$ ), 95.8, 114.3, 118.8, 119.9, 122.6, 124.3, 127.0, 128.7, 129.5, 129.7, 130.7, 138.9, 139.5, 139.6, 140.6, 159.1 (HNC=), 161.8 (NC=O), 190.2 (C=O); HRMS (EI):  $m/z$  calcd for  $\text{C}_{23}\text{H}_{18}\text{ClF}_3\text{N}_4\text{O}_2$  [M], 474.1070; found, 474.1078.

**(Z)-4-(3-Oxo-2-(tetrahydropyrimidin-2(1H)-ylidene)-3-*p*-tolylpropylidene)-1-(2,4,6-trichlorophenyl)-3-(trifluoromethyl)-1H-pyrazol-5(4H)-one (7m)**

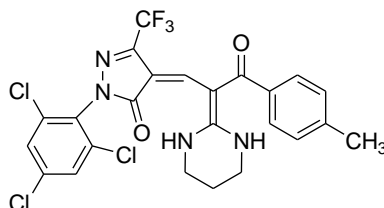

saffron yellow solid; Mp 286–289 °C; IR (KBr): 3279, 2918, 1633, 1591, 1498, 1345, 1272, 1142, 1091, 993, 747  $\text{cm}^{-1}$ ;  $^1\text{H}$  NMR (400 MHz,  $\text{DMSO-}d_6$ ):  $\delta$  = 1.86–1.90 (m, 2H,  $\text{CH}_2$ ), 2.36 (s, 3H,  $\text{ArCH}_3$ ), 3.26–3.35 (m, 4H,  $\text{NCH}_2\text{CH}_2\text{N}$ ), 7.27–7.29 (m, 2H, ArH), 7.35 (s, 1H, CH), 7.42–7.44 (m, 2H, ArH), 7.84 (m, 2H, ArH), 9.23 (br, 2H, NH);  $^{13}\text{C}$  NMR (100 MHz,  $\text{DMSO-}d_6$ ):  $\delta$  = 17.3 ( $\text{CH}_2$ ), 21.1 ( $\text{PhCH}_3$ ), 37.6 ( $\text{NCH}_2$ ), 37.6 ( $\text{CH}_2\text{N}$ ), 93.3, 114.4, 121.4 (d,  $J$  = 268.8 Hz), 122.7, 128.4, 128.6, 133.9, 134.5, 135.8, 136.5, 139.6, 140.4, 140.8, 160.0 (HNC=), 161.8 (NC=O), 191.3 (C=O); HRMS (TOF  $\text{ES}^+$ ):  $m/z$  calcd for  $\text{C}_{24}\text{H}_{18}\text{Cl}_3\text{F}_3\text{N}_4\text{O}_2$  [(M+H) $^+$ ], 557.0520; found, 557.0519.

**(Z)-4-(2-(1,3-Diazepan-2-ylidene)-3-(4-methoxyphenyl)-3-oxopropylidene)-3-methyl-1-phenyl-1H-pyrazol-5(4H)-one (8a)**

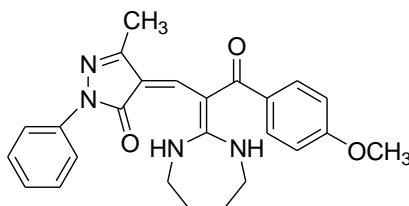

Saffron yellow solid; Mp 244–248.5 °C; IR (KBr): 3280, 2924, 1634, 1595, 1501, 1349, 1268, 1162, 1138, 1033, 993, 801, 755  $\text{cm}^{-1}$ ;  $^1\text{H}$  NMR (400 MHz,  $\text{DMSO-}d_6$ ):  $\delta$  = 1.74–1.78 (m, 4H,  $\text{NCH}_2\text{CH}_2\text{N}$ ), 1.97 (s, 3H,  $\text{CH}_3$ ), 3.33–3.36 (m, 4H,  $\text{NCH}_2\text{CH}_2\text{N}$ ),

3.78 (s, 3H, OCH<sub>3</sub>), 6.97–6.99 (m, 3H, CH and ArH), 7.25–7.31 (m, 3H, ArH), 7.47–7.49 (m, 2H, ArH), 7.94–7.96 (m, 2H, ArH), 8.81 (br, 2H, NH); <sup>13</sup>C NMR (100 MHz, DMSO-*d*<sub>6</sub>): δ = 13.3 (CH<sub>3</sub>), 26.3 (CH<sub>2</sub>CH<sub>2</sub>), 26.3 (CH<sub>2</sub>CH<sub>2</sub>), 43.5 (NCH<sub>2</sub>), 43.5 (CH<sub>2</sub>N), 55.3 (OCH<sub>3</sub>), 101.6, 110.9, 113.2, 117.4, 122.4, 128.4, 130.2, 133.1, 140.4, 141.5, 149.9, 160.9 (HNC=), 162.9 (NC=O), 167.3 (CH<sub>3</sub>OC), 190.4 (C=O); HRMS (EI): *m/z* calcd for C<sub>25</sub>H<sub>26</sub>N<sub>4</sub>O<sub>3</sub> [M], 430.2005; found, 430.2000.

**(Z)-4-(2-(1,3-Diazepan-2-ylidene)-3-oxo-3-*p*-tolylpropylidene)-3-methyl-1-phenyl-1H-pyrazol-5(4H)-one (8b)**

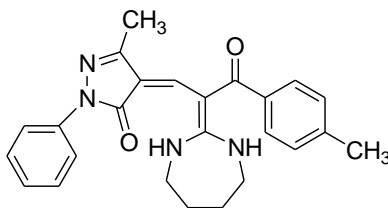

Saffron yellow solid; Mp 263–265 °C; IR (KBr): 3281, 2922, 1633, 1499, 1352, 1273, 1142, 1001, 790, 750 cm<sup>-1</sup>; <sup>1</sup>H NMR (400 MHz, DMSO-*d*<sub>6</sub>): δ = 1.82–1.87 (m, 4H, CH<sub>2</sub>CH<sub>2</sub>), 2.19 (s, 3H, CH<sub>3</sub>), 2.35 (s, 3H, ArCH<sub>3</sub>), 3.39–3.43 (m, 4H, NCH<sub>2</sub>CH<sub>2</sub>N), 7.21 (s, 1H, CH), 7.27–7.37 (m, 3H, ArH), 7.46–7.49 (m, 3H, ArH), 7.54–7.57 (m, 3H, ArH), 9.27 (br, 2H, NH); <sup>13</sup>C NMR (100 MHz, DMSO-*d*<sub>6</sub>): δ = 11.0 (CH<sub>3</sub>), 21.1 (PhCH<sub>3</sub>), 25.9 (CH<sub>2</sub>CH<sub>2</sub>), 25.9 (CH<sub>2</sub>CH<sub>2</sub>), 43.6 (NCH<sub>2</sub>), 43.6 (CH<sub>2</sub>N), 99.8, 120.6, 122.7, 126.4, 129.0, 129.1, 129.3, 135.0, 135.4, 139.0, 142.5, 150.6, 158.5 (HNC=), 164.0 (NC=O), 192.6 (C=O); HRMS (EI): *m/z* calcd for C<sub>25</sub>H<sub>26</sub>N<sub>4</sub>O<sub>2</sub> [M], 414.2056; found, 414.2053.

**(Z)-4-(2-(1,3-Diazepan-2-ylidene)-3-oxo-3-phenylpropylidene)-3-methyl-1-phenyl-1H-pyrazol-5(4H)-one (8c)**

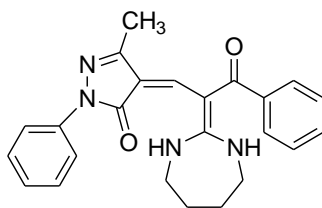

Saffron yellow solid; Mp 223–227 °C; IR (KBr): 3274, 2926, 1633, 1499, 1341, 1268, 1138, 997, 805, 750 cm<sup>-1</sup>; <sup>1</sup>H NMR (400 MHz, CDCl<sub>3</sub>): δ = 1.86–1.93 (m, 4H, CH<sub>2</sub>CH<sub>2</sub>), 1.92 (s, 3H, CH<sub>3</sub>), 3.17 (m, 2H, NCH<sub>2</sub>), 3.49 (m, 2H, NCH<sub>2</sub>), 7.07–7.11 (m, 1H, ArH), 7.26 (s, 1H, CH), 7.31–7.39 (m, 4H, ArH), 7.43–7.46 (m, 1H, ArH), 7.51–7.52 (m, 2H, ArH), 7.76–7.78 (m, 2H, ArH); <sup>13</sup>C NMR (100 MHz, CDCl<sub>3</sub>): δ = 12.9 (CH<sub>3</sub>), 26.4 (CH<sub>2</sub>CH<sub>2</sub>), 26.4 (CH<sub>2</sub>CH<sub>2</sub>), 44.8 (NCH<sub>2</sub>), 44.8 (CH<sub>2</sub>N), 104.2, 109.5, 119.9, 124.5, 128.2, 128.6, 128.8, 131.2, 138.8, 140.1, 145.9, 151.5, 162.8 (HNC=), 166.6 (NC=O), 195.6 (C=O); HRMS (EI): *m/z* calcd for C<sub>24</sub>H<sub>24</sub>N<sub>4</sub>O<sub>2</sub> [M], 400.1899; found, 400.1908.

**(Z)-4-(3-(4-Chlorophenyl)-2-(1,3-diazepan-2-ylidene)-3-oxopropylidene)-3-methyl-1-phenyl-1H-pyrazol-5(4H)-one (8d)**

**1-1-phenyl-1H-pyrazol-5(4H)-one (8d)**

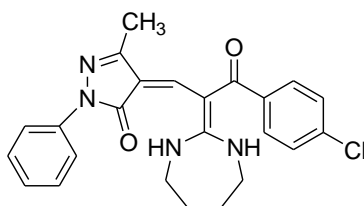

Saffron yellow solid; Mp 275–279 °C; IR (KBr): 3279, 2918, 1633, 1591, 1498, 1345, 1272, 1142, 1091, 933, 837, 747  $\text{cm}^{-1}$ ;  $^1\text{H}$  NMR (400 MHz,  $\text{DMSO-}d_6$ ):  $\delta$  = 1.82–1.86 (m, 4H,  $\text{CH}_2\text{CH}_2$ ), 2.21 (s, 3H,  $\text{CH}_3$ ), 3.40–3.45 (m, 4H,  $\text{NCH}_2\text{CH}_2\text{N}$ ), 7.22 (s, 1H, CH), 7.26–7.30 (m, 1H, ArH), 7.46–7.49 (m, 2H, ArH), 7.56–7.58 (m, 4H, ArH), 7.63–7.65 (m, 2H, ArH), 9.29 (br, 2H, NH);  $^{13}\text{C}$  NMR (100 MHz,  $\text{DMSO-}d_6$ ):  $\delta$  = 11.1 ( $\text{CH}_3$ ), 25.8 ( $\text{CH}_2\text{CH}_2$ ), 26.0 ( $\text{CH}_2\text{CH}_2$ ), 43.6 ( $\text{NCH}_2$ ), 43.6 ( $\text{CH}_2\text{N}$ ), 99.9, 120.6, 121.9, 126.3, 128.6, 129.3, 130.7, 135.4, 136.6, 136.8, 139.6, 150.8, 158.6 ( $\text{HNC=}$ ), 163.9 ( $\text{NC=O}$ ), 191.7 ( $\text{C=O}$ ); HRMS (EI):  $m/z$  calcd for  $\text{C}_{24}\text{H}_{23}\text{ClN}_4\text{O}_2$  [M], 434.1510; found, 434.1524.

**(Z)-4-(3-(2-Chlorophenyl)-2-(1,3-diazepan-2-ylidene)-3-oxopropylidene)-3-methyl-1-1-phenyl-1H-pyrazol-5(4H)-one (8e)**

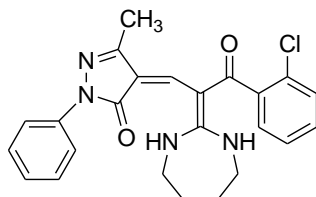

Saffron yellow solid; Mp 244–249 °C; IR (KBr): 3317, 2922, 1635, 1581, 1504, 1443, 1349, 1283, 1146, 1055, 993, 750  $\text{cm}^{-1}$ ;  $^1\text{H}$  NMR (500 MHz,  $\text{DMSO-}d_6$ ):  $\delta$  = 1.76–1.96 (m, 7H,  $\text{CH}_3$  and  $\text{CH}_2\text{CH}_2$ ), 3.38–3.41 (m, 4H,  $\text{NCH}_2\text{CH}_2\text{N}$ ), 6.99–7.02 (m, 1H, ArH), 7.29–7.32 (m, 2H, ArH), 7.38 (s, 1H, CH), 7.41–7.42 (m, 3H, ArH), 7.49 (m, 1H, ArH), 7.98–7.99 (m, 2H, ArH), 8.83 (br, 2H, NH);  $^{13}\text{C}$  NMR (125 MHz,  $\text{DMSO-}d_6$ ):  $\delta$  = 13.2 ( $\text{CH}_3$ ), 26.4 ( $\text{CH}_2\text{CH}_2$ ), 26.4 ( $\text{CH}_2\text{CH}_2$ ), 43.4 ( $\text{NCH}_2$ ), 43.4 ( $\text{CH}_2\text{N}$ ), 102.7, 111.1, 117.7, 122.7, 127.1, 128.1, 128.7, 129.3, 129.7, 130.0, 130.4, 140.7, 141.4, 149.9, 163.3 ( $\text{HNC=}$ ), 166.3 ( $\text{NC=O}$ ), 188.7 ( $\text{C=O}$ ); HRMS (EI):  $m/z$  calcd for  $\text{C}_{24}\text{H}_{23}\text{ClN}_4\text{O}_2$  [M], 434.1510; found, 434.1502.

**(Z)-4-(2-(1,3-Diazepan-2-ylidene)-3-(4-methoxyphenyl)-3-oxopropylidene)-1-phenyl-3-(trifluoromethyl)-1H-pyrazol-5(4H)-one (8f)**

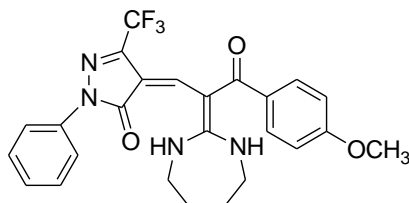

Saffron yellow solid; Mp 288–290.5 °C; IR (KBr): 3305, 2926, 1635, 1595, 1500, 1396, 1289, 1262, 1173, 1115, 1019, 982, 841, 754  $\text{cm}^{-1}$ ;  $^1\text{H}$  NMR (400 MHz,



DMSO-*d*<sub>6</sub>:  $\delta$  = 1.85 (m, 4H, 2CH<sub>2</sub>), 3.44 (m, 4H, 2CH<sub>2</sub>), 3.79 (s, 3H, OCH<sub>3</sub>), 7.00–7.02 (m, 2H, ArH), 7.11–7.15 (m, 1H, ArH), 7.32 (s, 1H, CH), 7.36–7.39 (m, 2H, ArH), 7.51–7.53 (m, 2H, ArH), 7.92–7.94 (m, 2H, ArH), 9.025 (s, 2H, NH); <sup>13</sup>C NMR (100 MHz, DMSO-*d*<sub>6</sub>):  $\delta$  = 26.2 (CH<sub>2</sub>CH<sub>2</sub>), 26.2 (CH<sub>2</sub>CH<sub>2</sub>), 43.2 (NCH<sub>2</sub>), 43.2 (CH<sub>2</sub>N), 55.4 (OCH<sub>3</sub>), 95.3, 113.4, 115.9, 118.8, 120.6 (d, *J* = 268.7 Hz), 124.2, 128.7, 130.6, 131.6, 139.1, 139.3, 139.7, 161.5, 161.9 (HNC=), 165.7 (NC=O), 191.6 (C=O); HRMS (ED): *m/z* calcd for C<sub>25</sub>H<sub>23</sub>F<sub>3</sub>N<sub>4</sub>O<sub>3</sub> [M], 484.1722; found, 484.1727.

**(Z)-4-(2-(1,3-Diazepan-2-ylidene)-3-oxo-3-p-tolylpropylidene)-1-phenyl-3-(trifluoromethyl)-1H-pyrazol-5(4H)-one (8g)**

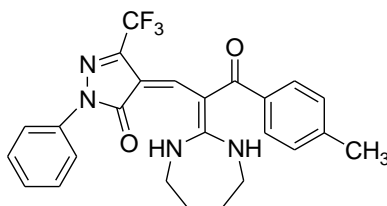

Saffron yellow solid; Mp 298–300 °C; IR (KBr): 3300, 2929, 1636, 1498, 1396, 1285, 1178, 1115, 986, 834, 755 cm<sup>-1</sup>; <sup>1</sup>H NMR (500 MHz, DMSO-*d*<sub>6</sub>):  $\delta$  = 1.85–1.90 (m, 4H, CH<sub>2</sub>CH<sub>2</sub>), 2.38 (s, 3H, ArCH<sub>3</sub>), 3.42–3.48 (m, 4H, NCH<sub>2</sub>CH<sub>2</sub>N), 7.14–7.17 (m, 1H, ArH), 7.29–7.31 (m, 2H, ArH), 7.37–7.42 (m, 4H, CH and ArH), 7.45–7.47 (m, 1H, ArH), 7.98–7.99 (m, 2H, ArH), 9.08 (br, 2H, NH); <sup>13</sup>C NMR (125 MHz, DMSO-*d*<sub>6</sub>):  $\delta$  = 21.4 (CH<sub>3</sub>), 26.6 (CH<sub>2</sub>CH<sub>2</sub>), 26.6 (CH<sub>2</sub>CH<sub>2</sub>), 43.6 (NCH<sub>2</sub>), 43.6 (CH<sub>2</sub>N), 95.8, 116.1, 119.0, 120.9, 123.0, 124.4, 128.7, 128.9, 137.2, 139.6, 140.1, 141.0, 162.0, 162.3 (HNC=), 166.1 (NC=O), 192.5 (C=O); HRMS (EI): *m/z* calcd for C<sub>25</sub>H<sub>23</sub>F<sub>3</sub>N<sub>4</sub>O<sub>2</sub> [M], 468.1773; found, 468.1767.

**(Z)-4-(2-(1,3-Diazepan-2-ylidene)-3-oxo-3-phenylpropylidene)-1-phenyl-3-(trifluoromethyl)-1H-pyrazol-5(4H)-one (8h)**

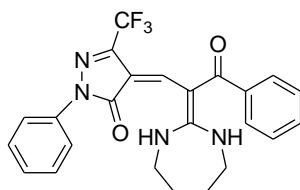

Saffron yellow solid; Mp 267–272 °C; IR (KBr): 3305, 3023, 1640, 1537, 1499, 1396, 1286, 1178, 1116, 986, 827, 689 cm<sup>-1</sup>; <sup>1</sup>H NMR (400 MHz, DMSO-*d*<sub>6</sub>):  $\delta$  = 1.81–1.85 (m, 4H, NCH<sub>2</sub>CH<sub>2</sub>N), 3.39–3.50 (m, 4H, NCH<sub>2</sub>CH<sub>2</sub>N), 7.11–7.15 (m, 1H, ArH), 7.32 (s, 1H, CH), 7.36–7.39 (m, 3H, ArH), 7.45–7.54 (m, 4H, ArH), 7.93–7.95 (m, 2H, ArH), 9.08 (br, 2H, NH); <sup>13</sup>C NMR (100 MHz, DMSO-*d*<sub>6</sub>):  $\delta$  = 26.2 (CH<sub>2</sub>CH<sub>2</sub>), 26.2 (CH<sub>2</sub>CH<sub>2</sub>), 43.2 (NCH<sub>2</sub>), 43.2 (CH<sub>2</sub>N), 95.6, 115.6, 118.7, 120.2, 124.2, 128.0, 128.1, 128.7, 130.7, 139.5, 139.6, 139.7, 161.9 (HNC=), 165.5 (NC=O), 192.5 (C=O); HRMS (ED): *m/z* calcd for C<sub>24</sub>H<sub>21</sub>F<sub>3</sub>N<sub>4</sub>O<sub>2</sub> [M], 454.1617; found, 454.1611.

**(Z)-4-(3-(4-Chlorophenyl)-2-(1,3-diazepan-2-ylidene)-3-oxopropylidene)-1-phenyl-3-(trifluoromethyl)-1H-pyrazol-5(4H)-one (8i)**

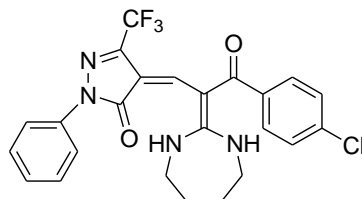

Saffron yellow solid; Mp 291–294 °C; IR (KBr): 3300, 3023, 1635, 1591, 1498, 1396, 1288, 1179, 1117, 986, 834, 750  $\text{cm}^{-1}$ ;  $^1\text{H}$  NMR (400 MHz,  $\text{DMSO-}d_6$ ):  $\delta$  = 1.81–1.85 (m, 4H,  $\text{CH}_2\text{CH}_2$ ), 3.41–3.60 (m, 4H,  $\text{NCH}_2\text{CH}_2\text{N}$ ), 7.11–7.15 (m, 1H, ArH), 7.29 (s, 1H, CH), 7.36–7.39 (m, 2H, ArH), 7.49–7.52 (m, 2H, ArH), 7.54–7.57 (m, 2H, ArH), 7.90–7.94 (m, 2H, ArH), 9.09 (br, 2H, NH);  $^{13}\text{C}$  NMR (100 MHz,  $\text{DMSO-}d_6$ ):  $\delta$  = 26.2 ( $\text{CH}_2\text{CH}_2$ ), 26.2 ( $\text{CH}_2\text{CH}_2$ ), 43.2 ( $\text{NCH}_2$ ), 43.2 ( $\text{CH}_2\text{N}$ ), 95.9, 115.2, 118.8, 121.5 (d,  $J$  = 268.8 Hz), 124.3, 128.3, 128.7, 129.9, 135.4, 138.4, 139.3, 139.5, 139.7, 161.9, 165.3 (HNC=), 165.3 (NC=O), 919.1 (C=O); HRMS (EI):  $m/z$  calcd for  $\text{C}_{24}\text{H}_{20}\text{ClF}_3\text{N}_4\text{O}_2$  [M], 488.1227; found, 488.1227.

**(Z)-4-(3-(2-Chlorophenyl)-2-(1,3-diazepan-2-ylidene)-3-oxopropylidene)-1-phenyl-3-(trifluoromethyl)-1H-pyrazol-5(4H)-one (8j)**

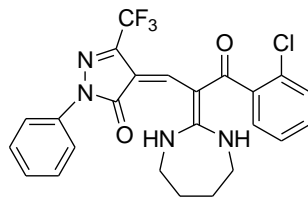

Saffron yellow solid; Mp 298–302 °C; IR (KBr): 3333, 2947, 1640, 1592, 1540, 1500, 1180, 1113, 982, 827, 758  $\text{cm}^{-1}$ ;  $^1\text{H}$  NMR (400 MHz,  $\text{DMSO-}d_6$ ):  $\delta$  = 1.80–1.90 (m, 4H,  $\text{CH}_2\text{CH}_2$ ), 3.50–3.55 (m, 4H,  $\text{NCH}_2\text{CH}_2\text{N}$ ), 7.07 (s, 1H, CH), 7.11–7.15 (m, 1H, ArH), 7.36–7.48 (m, 5H, ArH), 7.51–7.53 (m, 1H, ArH), 7.90–7.92 (m, 2H, ArH), 9.04 (br, 2H, NH);  $^{13}\text{C}$  NMR (100 MHz,  $\text{DMSO-}d_6$ ):  $\delta$  = 26.1 ( $\text{CH}_2\text{CH}_2$ ), 26.1 ( $\text{CH}_2\text{CH}_2$ ), 43.0 ( $\text{NCH}_2$ ), 43.0 ( $\text{CH}_2\text{N}$ ), 95.9, 106.5, 115.8, 118.8, 121.2 (d,  $J$  = 268.7 Hz), 124.3, 125.3, 126.9, 128.7, 128.8, 129.5, 129.6, 130.6, 139.1–140.0 (m), 139.3, 161.9 (HNC=), 164.4 (NC=O), 190.5 (C=O); HRMS (TOF ES $^+$ ):  $m/z$  calcd for  $\text{C}_{24}\text{H}_{20}\text{ClF}_3\text{N}_4\text{O}_2$  [(M+H) $^+$ ], 489.1300; found, 489.1300.

## X-ray Structure and Data<sup>2</sup> of 6c

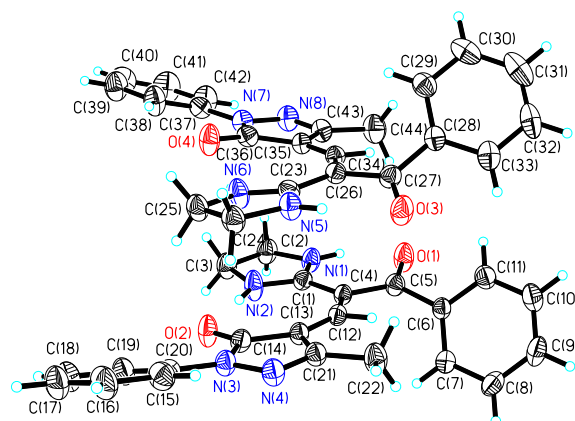

**Figure S1** X-Ray crystal structure of **6c**

**Table S1** Crystal data and structure refinement for **6c**

|                                   |                                                                                                                                    |
|-----------------------------------|------------------------------------------------------------------------------------------------------------------------------------|
| Identification code               | 120910b                                                                                                                            |
| Empirical formula                 | C <sub>22</sub> H <sub>20</sub> N <sub>4</sub> O <sub>2</sub>                                                                      |
| Formula weight                    | 372.42                                                                                                                             |
| Temperature                       | 298(2) K                                                                                                                           |
| Wavelength                        | 0.71073 Å                                                                                                                          |
| Crystal system, space group       | Monoclinic, P2(1)/c                                                                                                                |
| Unit cell dimensions              | a = 21.059(3) Å      alpha = 90.00 deg.<br>b = 11.2828(16) Å      beta = 95.888(2) deg.<br>c = 15.679(2) Å      gamma = 90.00 deg. |
| Volume                            | 3705.6(9) Å <sup>3</sup>                                                                                                           |
| Z, Calculated density             | 8, 1.335 Mg/m <sup>3</sup>                                                                                                         |
| Absorption coefficient            | 0.088 mm <sup>-1</sup>                                                                                                             |
| F(000)                            | 1568                                                                                                                               |
| Crystal size                      | 0.25 x 0.19 x 0.13 mm                                                                                                              |
| Theta range for data collection   | 1.94 to 25.00 deg.                                                                                                                 |
| Limiting indices                  | -25 ≤ h ≤ 17, -13 ≤ k ≤ 13, -18 ≤ l ≤ 18                                                                                           |
| Reflection collected/unique       | 26082 / 9253 [R(int) = 0.0347]                                                                                                     |
| Completeness to theta = 28.40     | 99.9 %                                                                                                                             |
| Absorption correction             | Semi-empirical from equivalents                                                                                                    |
| Max. and min. transmission        | 0.9886 and 0.9783                                                                                                                  |
| Refinement method                 | SHELXL                                                                                                                             |
| Data/restraints/parameters        | 6533 / 0 / 508                                                                                                                     |
| Goodness-of-fit on F <sup>2</sup> | 0.907                                                                                                                              |
| Final R indices [I > 2σ(I)]       | R1 = 0.1247, wR2 = 0.1373                                                                                                          |
| R indices (all data)              | R1 = 0.0525, wR2 = 0.1139                                                                                                          |
| Extinction coefficient            | 0.0023(4)                                                                                                                          |

**Table S2** Bond lengths [Å] and angles [deg] for **6c**

---

|             |          |
|-------------|----------|
| N(1)-C(1)   | 1.323(3) |
| N(1)-C(2)   | 1.443(3) |
| N(1)-H(1)   | 0.8600   |
| N(2)-C(1)   | 1.306(3) |
| N(2)-C(3)   | 1.446(3) |
| N(2)-H(2)   | 0.8600   |
| N(3)-C(14)  | 1.372(3) |
| N(3)-N(4)   | 1.406(3) |
| N(3)-C(15)  | 1.416(3) |
| N(4)-C(21)  | 1.289(3) |
| N(5)-C(23)  | 1.317(3) |
| N(5)-C(24)  | 1.444(3) |
| N(5)-H(5)   | 0.8600   |
| N(6)-C(23)  | 1.305(3) |
| N(6)-C(25)  | 1.462(3) |
| N(6)-H(6)   | 0.8600   |
| N(7)-C(36)  | 1.375(3) |
| N(7)-N(8)   | 1.400(3) |
| N(7)-C(37)  | 1.408(3) |
| N(8)-C(43)  | 1.296(3) |
| O(1)-C(5)   | 1.246(3) |
| O(2)-C(14)  | 1.246(3) |
| O(3)-C(27)  | 1.227(3) |
| O(4)-C(36)  | 1.253(3) |
| C(1)-C(4)   | 1.441(3) |
| C(2)-C(3)   | 1.515(3) |
| C(2)-H(2A)  | 0.9700   |
| C(2)-H(2B)  | 0.9700   |
| C(3)-H(3A)  | 0.9700   |
| C(3)-H(3B)  | 0.9700   |
| C(4)-C(12)  | 1.400(3) |
| C(4)-C(5)   | 1.450(3) |
| C(5)-C(6)   | 1.489(3) |
| C(6)-C(7)   | 1.378(3) |
| C(6)-C(11)  | 1.380(3) |
| C(7)-C(8)   | 1.369(3) |
| C(7)-H(7)   | 0.9300   |
| C(8)-C(9)   | 1.371(4) |
| C(8)-H(8)   | 0.9300   |
| C(9)-C(10)  | 1.357(4) |
| C(9)-H(9)   | 0.9300   |
| C(10)-C(11) | 1.369(4) |
| C(10)-H(10) | 0.9300   |
| C(11)-H(11) | 0.9300   |
| C(12)-C(13) | 1.392(3) |
| C(12)-H(12) | 0.9300   |
| C(13)-C(21) | 1.435(3) |
| C(13)-C(14) | 1.436(3) |
| C(15)-C(16) | 1.374(3) |
| C(15)-C(20) | 1.388(3) |
| C(16)-C(17) | 1.372(4) |

---

---

|              |          |
|--------------|----------|
| C(16)-H(16)  | 0.9300   |
| C(17)-C(18)  | 1.371(4) |
| C(17)-H(17)  | 0.9300   |
| C(18)-C(19)  | 1.362(4) |
| C(18)-H(18)  | 0.9300   |
| C(19)-C(20)  | 1.366(4) |
| C(19)-H(19)  | 0.9300   |
| C(20)-H(20)  | 0.9300   |
| C(21)-C(22)  | 1.494(3) |
| C(22)-H(22A) | 0.9600   |
| C(22)-H(22B) | 0.9600   |
| C(22)-H(22C) | 0.9600   |
| C(23)-C(26)  | 1.442(3) |
| C(24)-C(25)  | 1.512(3) |
| C(24)-H(24A) | 0.9700   |
| C(24)-H(24B) | 0.9700   |
| C(25)-H(25A) | 0.9700   |
| C(25)-H(25B) | 0.9700   |
| C(26)-C(34)  | 1.400(3) |
| C(26)-C(27)  | 1.464(3) |
| C(27)-C(28)  | 1.498(4) |
| C(28)-C(33)  | 1.377(4) |
| C(28)-C(29)  | 1.385(3) |
| C(29)-C(30)  | 1.364(4) |
| C(29)-H(29)  | 0.9300   |
| C(30)-C(31)  | 1.369(5) |
| C(30)-H(30)  | 0.9300   |
| C(31)-C(32)  | 1.364(5) |
| C(31)-H(31)  | 0.9300   |
| C(32)-C(33)  | 1.378(4) |
| C(32)-H(32)  | 0.9300   |
| C(33)-H(33)  | 0.9300   |
| C(34)-C(35)  | 1.400(3) |
| C(34)-H(34)  | 0.9300   |
| C(35)-C(36)  | 1.431(3) |
| C(35)-C(43)  | 1.442(3) |
| C(37)-C(38)  | 1.366(4) |
| C(37)-C(42)  | 1.376(3) |
| C(38)-C(39)  | 1.372(4) |
| C(38)-H(38)  | 0.9300   |
| C(39)-C(40)  | 1.352(4) |
| C(39)-H(39)  | 0.9300   |
| C(40)-C(41)  | 1.349(4) |
| C(40)-H(40)  | 0.9300   |
| C(41)-C(42)  | 1.384(4) |
| C(41)-H(41)  | 0.9300   |
| C(42)-H(42)  | 0.9300   |
| C(43)-C(44)  | 1.490(4) |
| C(44)-H(44A) | 0.9600   |
| C(44)-H(44B) | 0.9600   |
| C(44)-H(44C) | 0.9600   |

---

Symmetry transformations used to generate equivalent atoms:

**Table S3** Torsion angles [deg] for **6c**

|                        |           |
|------------------------|-----------|
| C(14)-N(3)-N(4)-C(21)  | 1.1(3)    |
| C(15)-N(3)-N(4)-C(21)  | -169.8(2) |
| C(36)-N(7)-N(8)-C(43)  | 0.7(3)    |
| C(37)-N(7)-N(8)-C(43)  | 176.4(2)  |
| C(3)-N(2)-C(1)-N(1)    | -2.6(3)   |
| C(3)-N(2)-C(1)-C(4)    | 177.8(2)  |
| C(2)-N(1)-C(1)-N(2)    | -1.1(3)   |
| C(2)-N(1)-C(1)-C(4)    | 178.5(2)  |
| C(1)-N(1)-C(2)-C(3)    | 3.9(3)    |
| C(1)-N(2)-C(3)-C(2)    | 4.9(3)    |
| N(1)-C(2)-C(3)-N(2)    | -5.0(3)   |
| N(2)-C(1)-C(4)-C(12)   | -5.0(4)   |
| N(1)-C(1)-C(4)-C(12)   | 175.6(2)  |
| N(2)-C(1)-C(4)-C(5)    | -179.9(2) |
| N(1)-C(1)-C(4)-C(5)    | 0.6(4)    |
| C(12)-C(4)-C(5)-O(1)   | -162.1(2) |
| C(1)-C(4)-C(5)-O(1)    | 13.5(4)   |
| C(12)-C(4)-C(5)-C(6)   | 18.0(3)   |
| C(1)-C(4)-C(5)-C(6)    | -166.5(2) |
| O(1)-C(5)-C(6)-C(7)    | -131.0(3) |
| C(4)-C(5)-C(6)-C(7)    | 49.0(4)   |
| O(1)-C(5)-C(6)-C(11)   | 43.8(3)   |
| C(4)-C(5)-C(6)-C(11)   | -136.3(3) |
| C(11)-C(6)-C(7)-C(8)   | 0.4(4)    |
| C(5)-C(6)-C(7)-C(8)    | 175.2(2)  |
| C(6)-C(7)-C(8)-C(9)    | 0.8(4)    |
| C(7)-C(8)-C(9)-C(10)   | -0.7(5)   |
| C(8)-C(9)-C(10)-C(11)  | -0.5(5)   |
| C(9)-C(10)-C(11)-C(6)  | 1.6(4)    |
| C(7)-C(6)-C(11)-C(10)  | -1.6(4)   |
| C(5)-C(6)-C(11)-C(10)  | -176.6(2) |
| C(1)-C(4)-C(12)-C(13)  | 6.4(5)    |
| C(5)-C(4)-C(12)-C(13)  | -178.6(3) |
| C(4)-C(12)-C(13)-C(21) | -179.9(3) |
| C(4)-C(12)-C(13)-C(14) | 1.7(6)    |
| N(4)-N(3)-C(14)-O(2)   | 179.1(2)  |
| C(15)-N(3)-C(14)-O(2)  | -11.2(4)  |
| N(4)-N(3)-C(14)-C(13)  | -1.4(3)   |
| C(15)-N(3)-C(14)-C(13) | 168.2(2)  |
| C(12)-C(13)-C(14)-O(2) | -1.0(5)   |
| C(21)-C(13)-C(14)-O(2) | -179.5(3) |
| C(12)-C(13)-C(14)-N(3) | 179.6(3)  |
| C(21)-C(13)-C(14)-N(3) | 1.1(3)    |

---

|                         |           |
|-------------------------|-----------|
| C(14)-N(3)-C(15)-C(16)  | 21.7(4)   |
| N(4)-N(3)-C(15)-C(16)   | -169.2(2) |
| C(14)-N(3)-C(15)-C(20)  | -157.4(3) |
| N(4)-N(3)-C(15)-C(20)   | 11.6(3)   |
| C(20)-C(15)-C(16)-C(17) | 1.4(4)    |
| N(3)-C(15)-C(16)-C(17)  | -177.7(2) |
| C(15)-C(16)-C(17)-C(18) | -1.5(5)   |
| C(16)-C(17)-C(18)-C(19) | 0.4(5)    |
| C(17)-C(18)-C(19)-C(20) | 0.9(5)    |
| C(18)-C(19)-C(20)-C(15) | -1.0(5)   |
| C(16)-C(15)-C(20)-C(19) | -0.2(4)   |
| N(3)-C(15)-C(20)-C(19)  | 179.0(2)  |
| N(3)-N(4)-C(21)-C(13)   | -0.4(3)   |
| N(3)-N(4)-C(21)-C(22)   | -178.7(2) |
| C(12)-C(13)-C(21)-N(4)  | -179.2(2) |
| C(14)-C(13)-C(21)-N(4)  | -0.4(3)   |
| C(12)-C(13)-C(21)-C(22) | -1.1(4)   |
| C(14)-C(13)-C(21)-C(22) | 177.8(3)  |
| C(25)-N(6)-C(23)-N(5)   | 5.2(3)    |
| C(25)-N(6)-C(23)-C(26)  | -173.6(2) |
| C(24)-N(5)-C(23)-N(6)   | -3.1(3)   |
| C(24)-N(5)-C(23)-C(26)  | 175.7(2)  |
| C(23)-N(5)-C(24)-C(25)  | -0.2(3)   |
| C(23)-N(6)-C(25)-C(24)  | -5.0(3)   |
| N(5)-C(24)-C(25)-N(6)   | 2.9(3)    |
| N(6)-C(23)-C(26)-C(34)  | 1.1(4)    |
| N(5)-C(23)-C(26)-C(34)  | -177.5(2) |
| N(6)-C(23)-C(26)-C(27)  | -175.3(2) |
| N(5)-C(23)-C(26)-C(27)  | 6.1(4)    |
| C(34)-C(26)-C(27)-O(3)  | -151.5(3) |
| C(23)-C(26)-C(27)-O(3)  | 25.4(4)   |
| C(34)-C(26)-C(27)-C(28) | 31.0(3)   |
| C(23)-C(26)-C(27)-C(28) | -152.1(2) |
| O(3)-C(27)-C(28)-C(33)  | 30.5(4)   |
| C(26)-C(27)-C(28)-C(33) | -151.9(2) |
| O(3)-C(27)-C(28)-C(29)  | -143.2(3) |
| C(26)-C(27)-C(28)-C(29) | 34.4(4)   |
| C(33)-C(28)-C(29)-C(30) | 1.3(4)    |
| C(27)-C(28)-C(29)-C(30) | 175.0(2)  |
| C(28)-C(29)-C(30)-C(31) | 0.4(5)    |
| C(29)-C(30)-C(31)-C(32) | -1.3(5)   |
| C(30)-C(31)-C(32)-C(33) | 0.7(5)    |
| C(29)-C(28)-C(33)-C(32) | -1.9(4)   |
| C(27)-C(28)-C(33)-C(32) | -175.9(2) |

---



|                         |           |
|-------------------------|-----------|
| C(31)-C(32)-C(33)-C(28) | 1.0(4)    |
| C(23)-C(26)-C(34)-C(35) | 8.5(5)    |
| C(27)-C(26)-C(34)-C(35) | -175.0(3) |
| C(26)-C(34)-C(35)-C(36) | 8.1(6)    |
| C(26)-C(34)-C(35)-C(43) | -177.8(3) |
| N(8)-N(7)-C(36)-O(4)    | 176.9(2)  |
| C(37)-N(7)-C(36)-O(4)   | 1.8(4)    |
| N(8)-N(7)-C(36)-C(35)   | -1.1(3)   |
| C(37)-N(7)-C(36)-C(35)  | -176.2(2) |
| C(34)-C(35)-C(36)-O(4)  | -2.0(5)   |
| C(43)-C(35)-C(36)-O(4)  | -176.7(3) |
| C(34)-C(35)-C(36)-N(7)  | 175.8(3)  |
| C(43)-C(35)-C(36)-N(7)  | 1.0(3)    |
| C(36)-N(7)-C(37)-C(38)  | 6.7(4)    |
| N(8)-N(7)-C(37)-C(38)   | -168.2(2) |
| C(36)-N(7)-C(37)-C(42)  | -173.6(3) |
| N(8)-N(7)-C(37)-C(42)   | 11.5(4)   |
| C(42)-C(37)-C(38)-C(39) | -1.4(5)   |
| N(7)-C(37)-C(38)-C(39)  | 178.3(3)  |
| C(37)-C(38)-C(39)-C(40) | 1.8(5)    |
| C(38)-C(39)-C(40)-C(41) | -0.4(5)   |
| C(39)-C(40)-C(41)-C(42) | -1.3(6)   |
| C(38)-C(37)-C(42)-C(41) | -0.3(5)   |
| N(7)-C(37)-C(42)-C(41)  | -180.0(3) |
| C(40)-C(41)-C(42)-C(37) | 1.6(6)    |
| N(7)-N(8)-C(43)-C(35)   | 0.1(3)    |
| N(7)-N(8)-C(43)-C(44)   | -177.4(2) |
| C(34)-C(35)-C(43)-N(8)  | -176.4(2) |
| C(36)-C(35)-C(43)-N(8)  | -0.7(3)   |
| C(34)-C(35)-C(43)-C(44) | 0.8(4)    |
| C(36)-C(35)-C(43)-C(44) | 176.5(3)  |

**Table S4** Hydrogen bonds for **6c** [A and deg.]

| D-H...A          | d(D-H) | d(H...A) | d(D...A) | <(DHA) |
|------------------|--------|----------|----------|--------|
| N(6)-H(6)...O(4) | 0.86   | 1.83     | 2.585(3) | 145.1  |
| N(5)-H(5)...O(3) | 0.86   | 2.12     | 2.675(3) | 122.0  |
| N(2)-H(2)...O(2) | 0.86   | 1.74     | 2.604(3) | 178.9  |
| N(1)-H(1)...O(3) | 0.86   | 2.34     | 3.107(3) | 149.3  |
| N(1)-H(1)...O(1) | 0.86   | 1.99     | 2.586(3) | 125.7  |

## $^1\text{H}$ NMR and $^{13}\text{C}$ NMR Spectra for $\alpha,\beta$ -Unsaturated Pyrazolone-Based HKAs 6-8

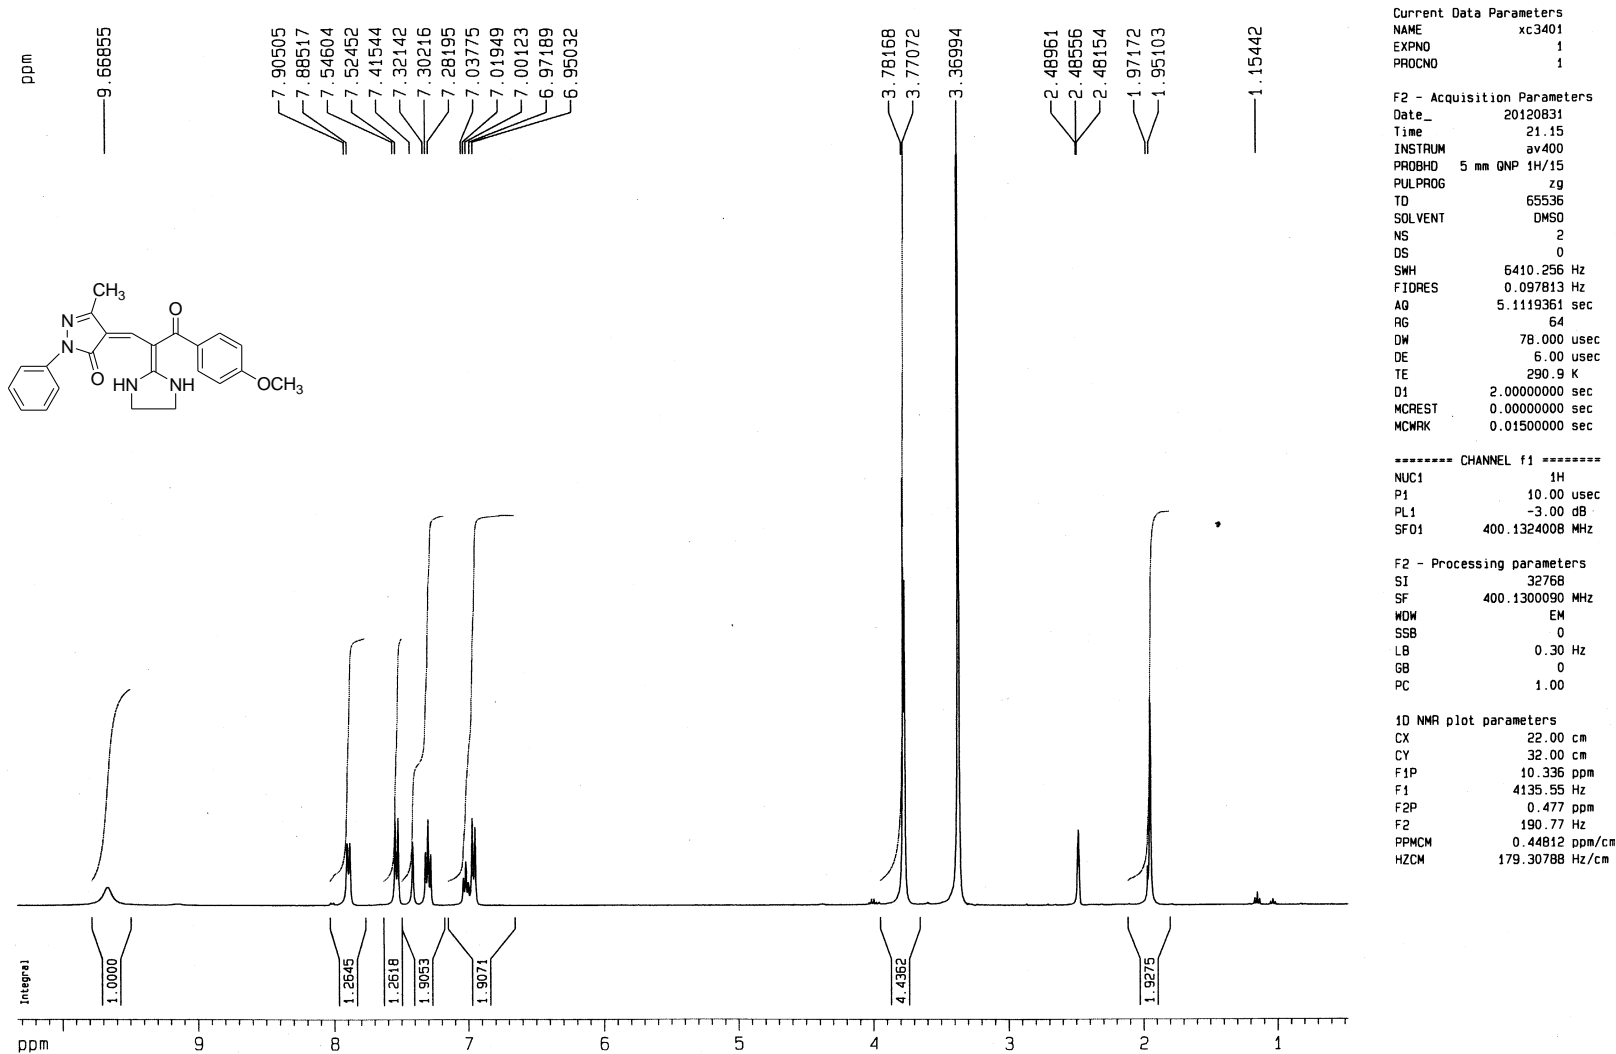

Figure 1.  $^1\text{H}$  NMR (400 MHz,  $\text{DMSO}-d_6$ ) spectra of compound 6a

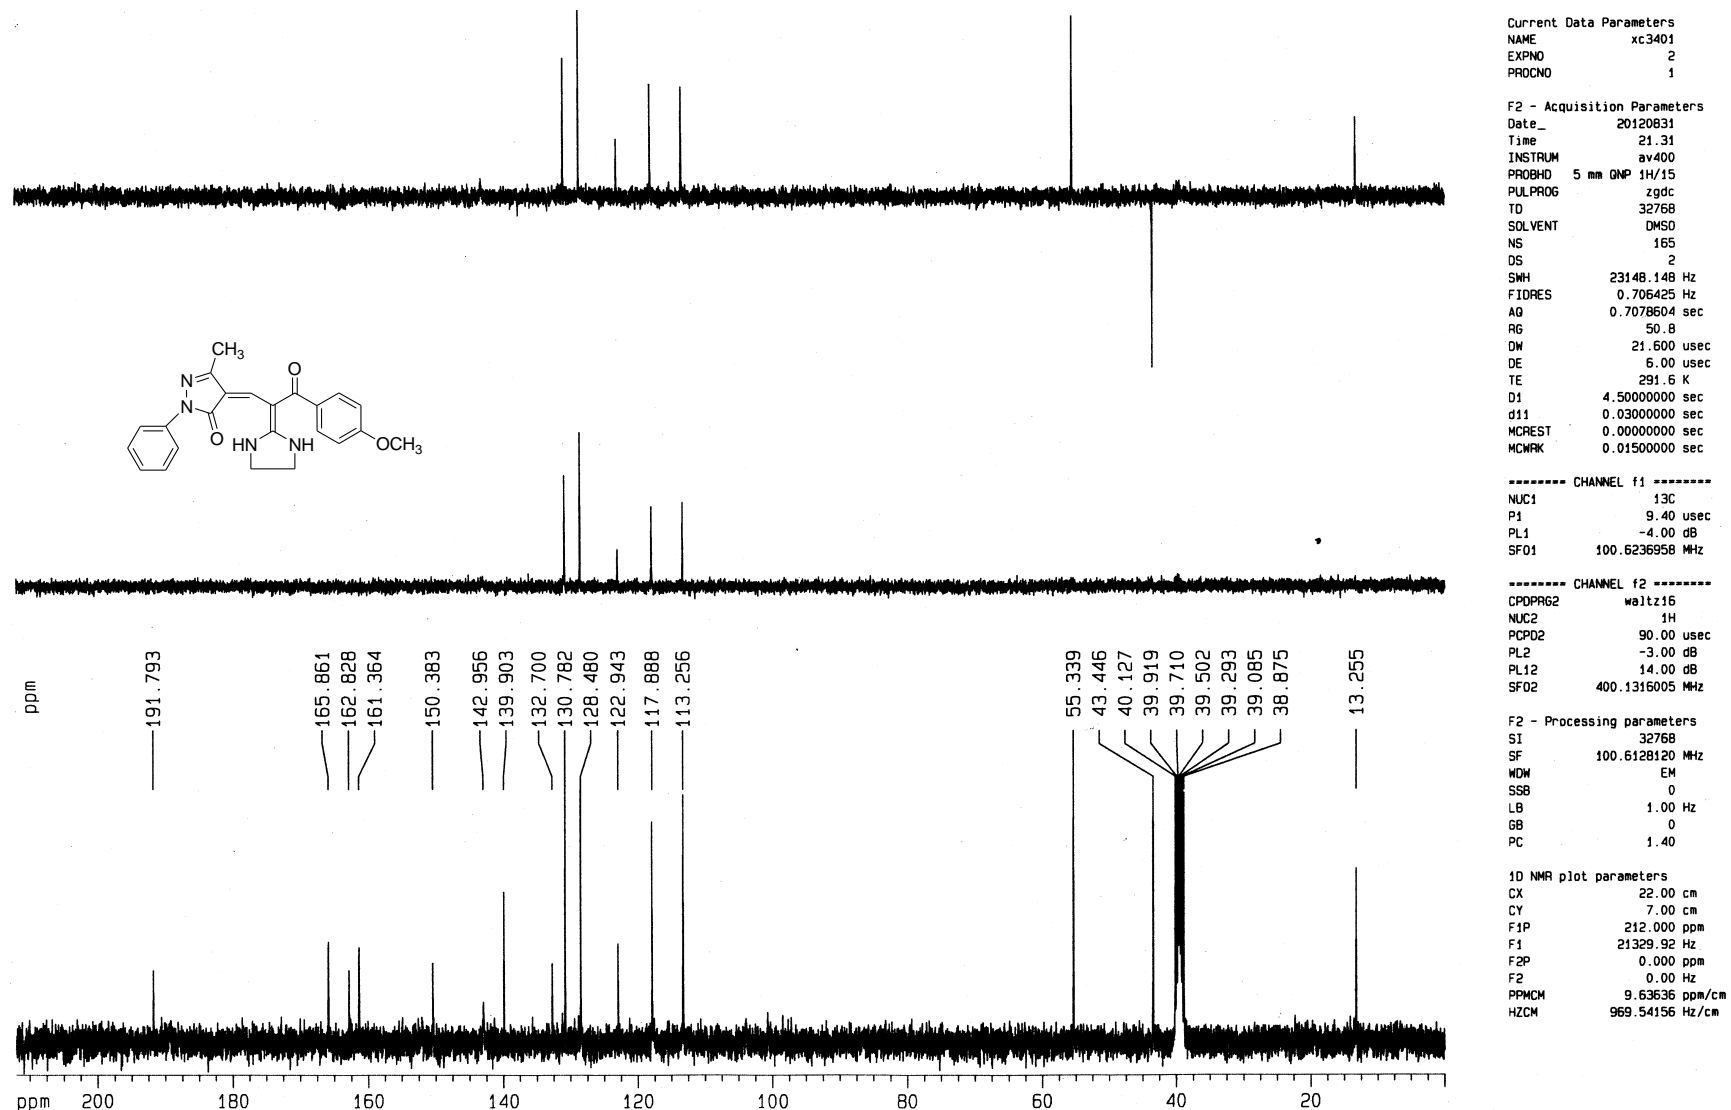

Figure 2.  $^{13}\text{C}$  NMR (100 MHz,  $\text{DMSO-}d_6$ ) spectra of compound 6a

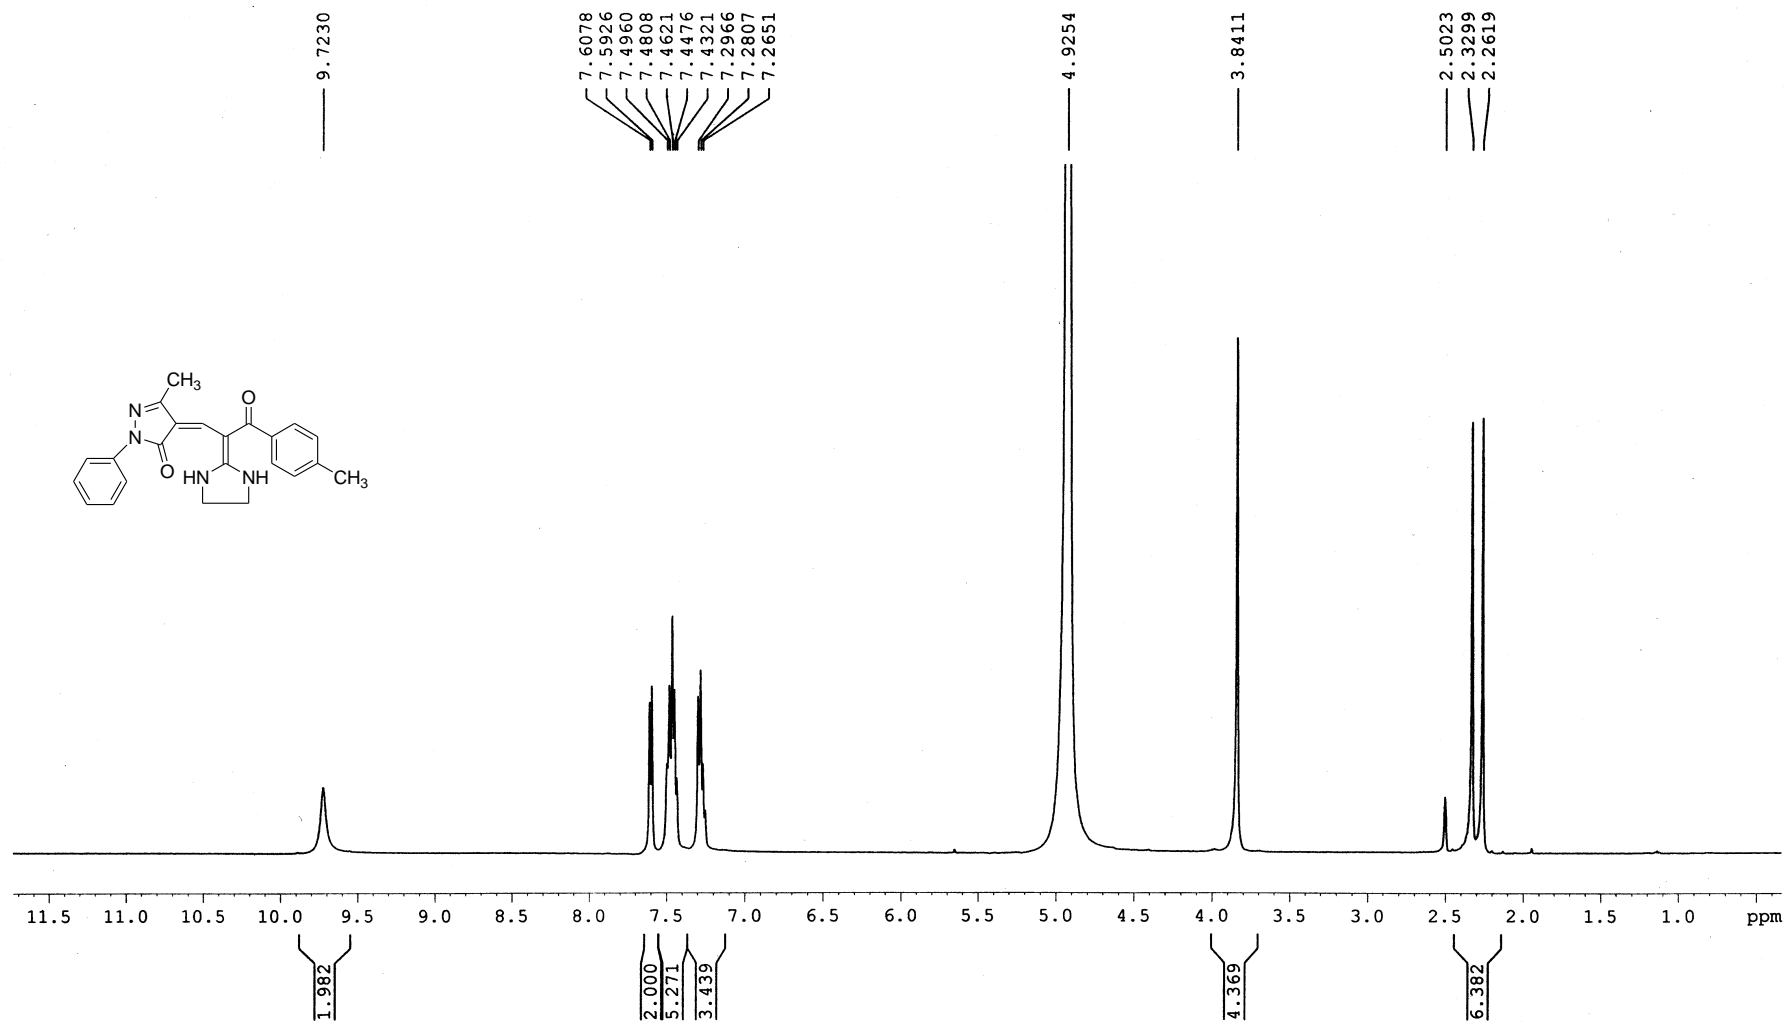

**Figure 3.** <sup>1</sup>H NMR (500 MHz, DMSO-*d*<sub>6</sub>+HClO<sub>4</sub>) spectra of compound **6b**

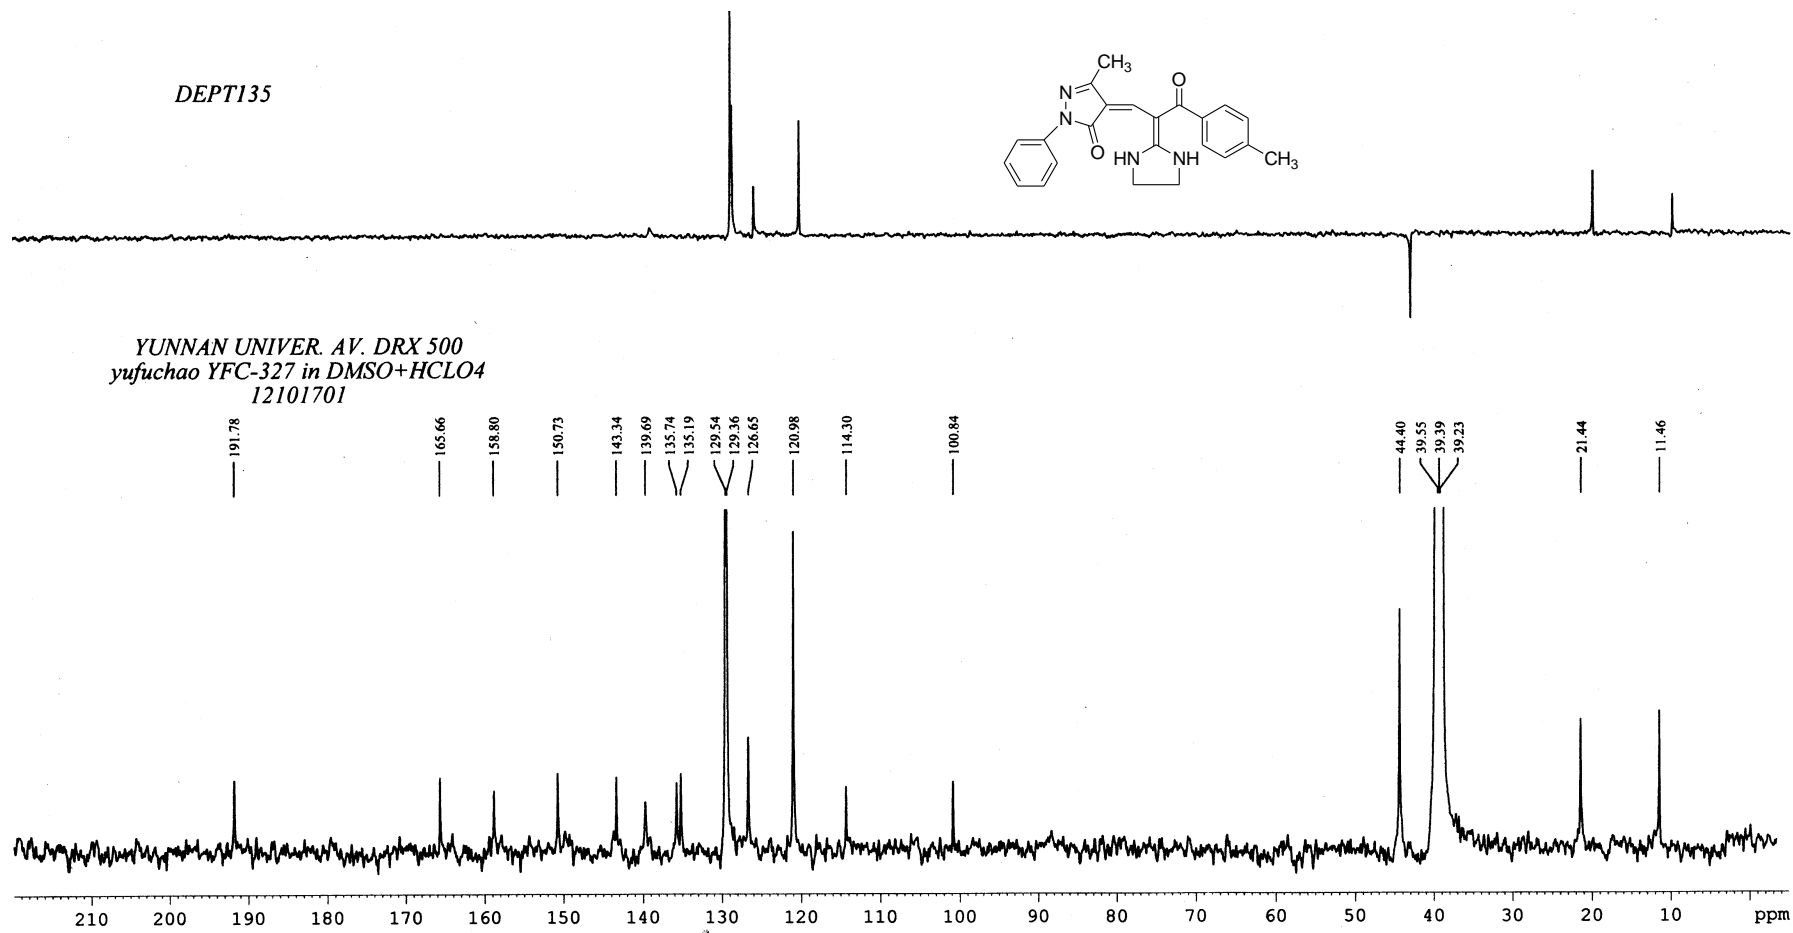

Figure 4.  $^{13}\text{C}$  NMR (125 MHz,  $\text{DMSO-}d_6 + \text{HClO}_4$ ) spectra of compound 6b

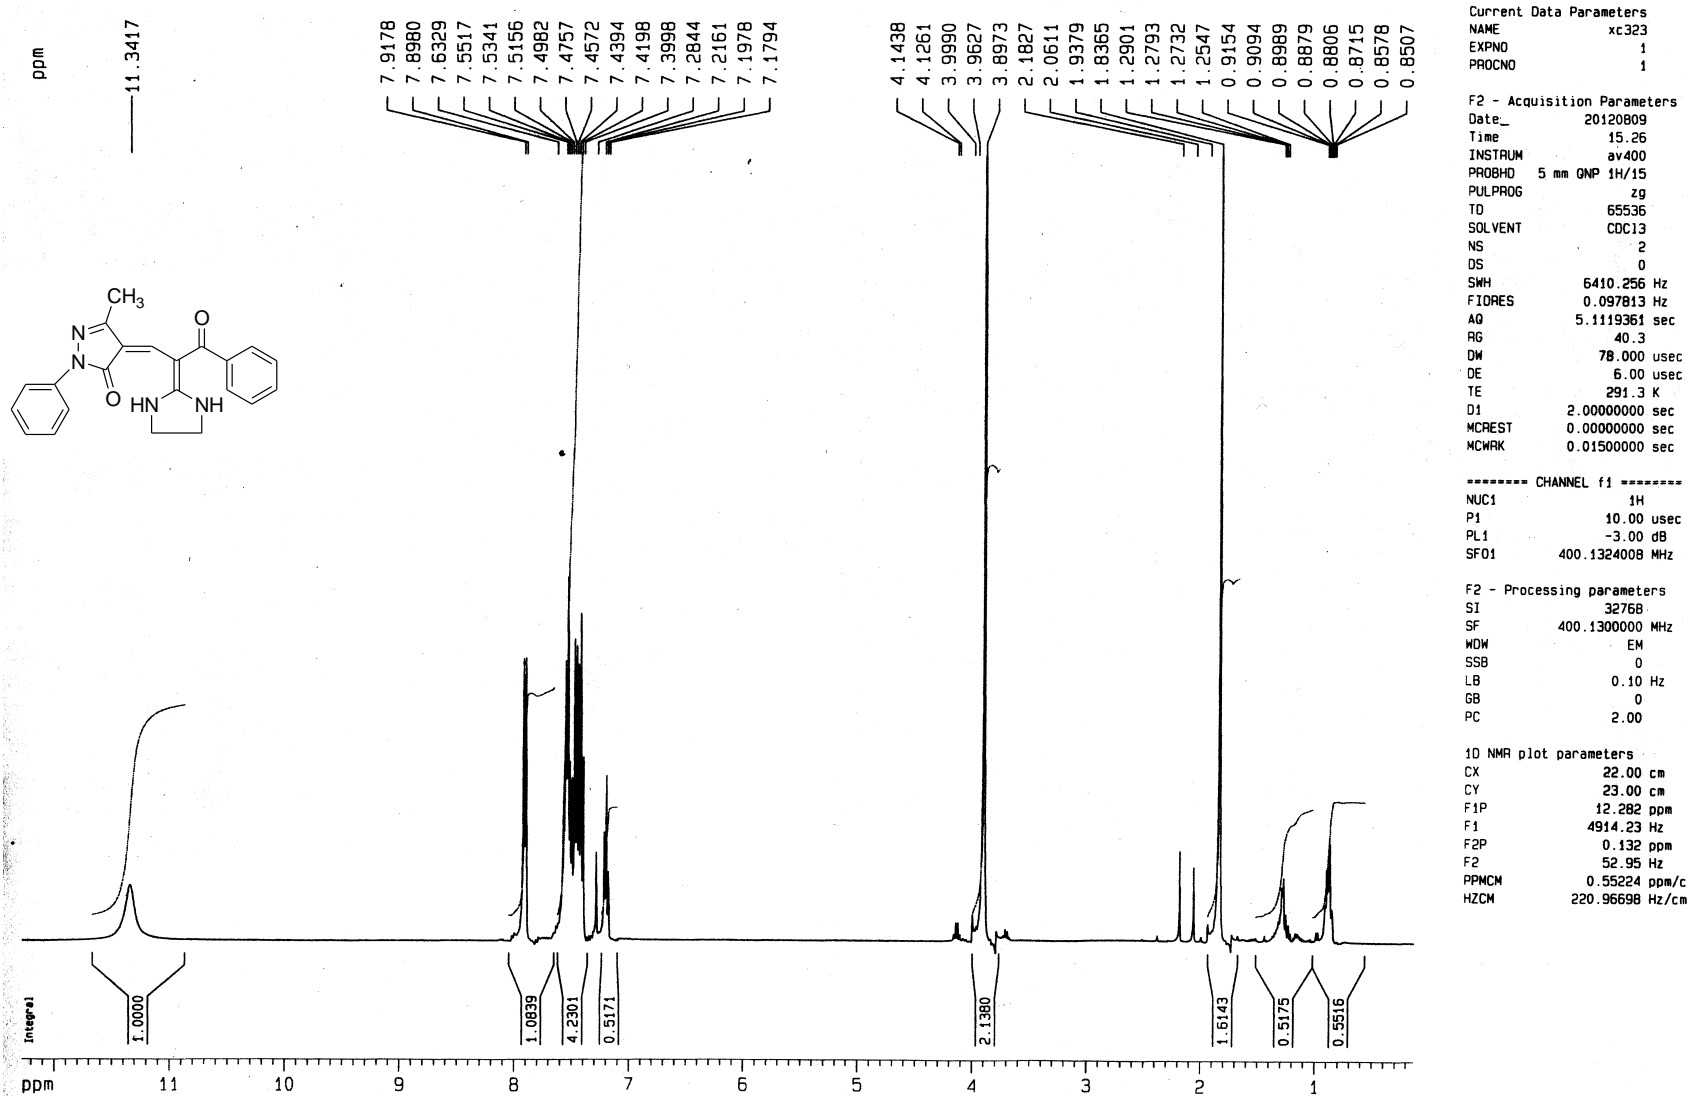

Figure 5. <sup>1</sup>H NMR (400 MHz, CDCl<sub>3</sub>) spectra of compound 6c

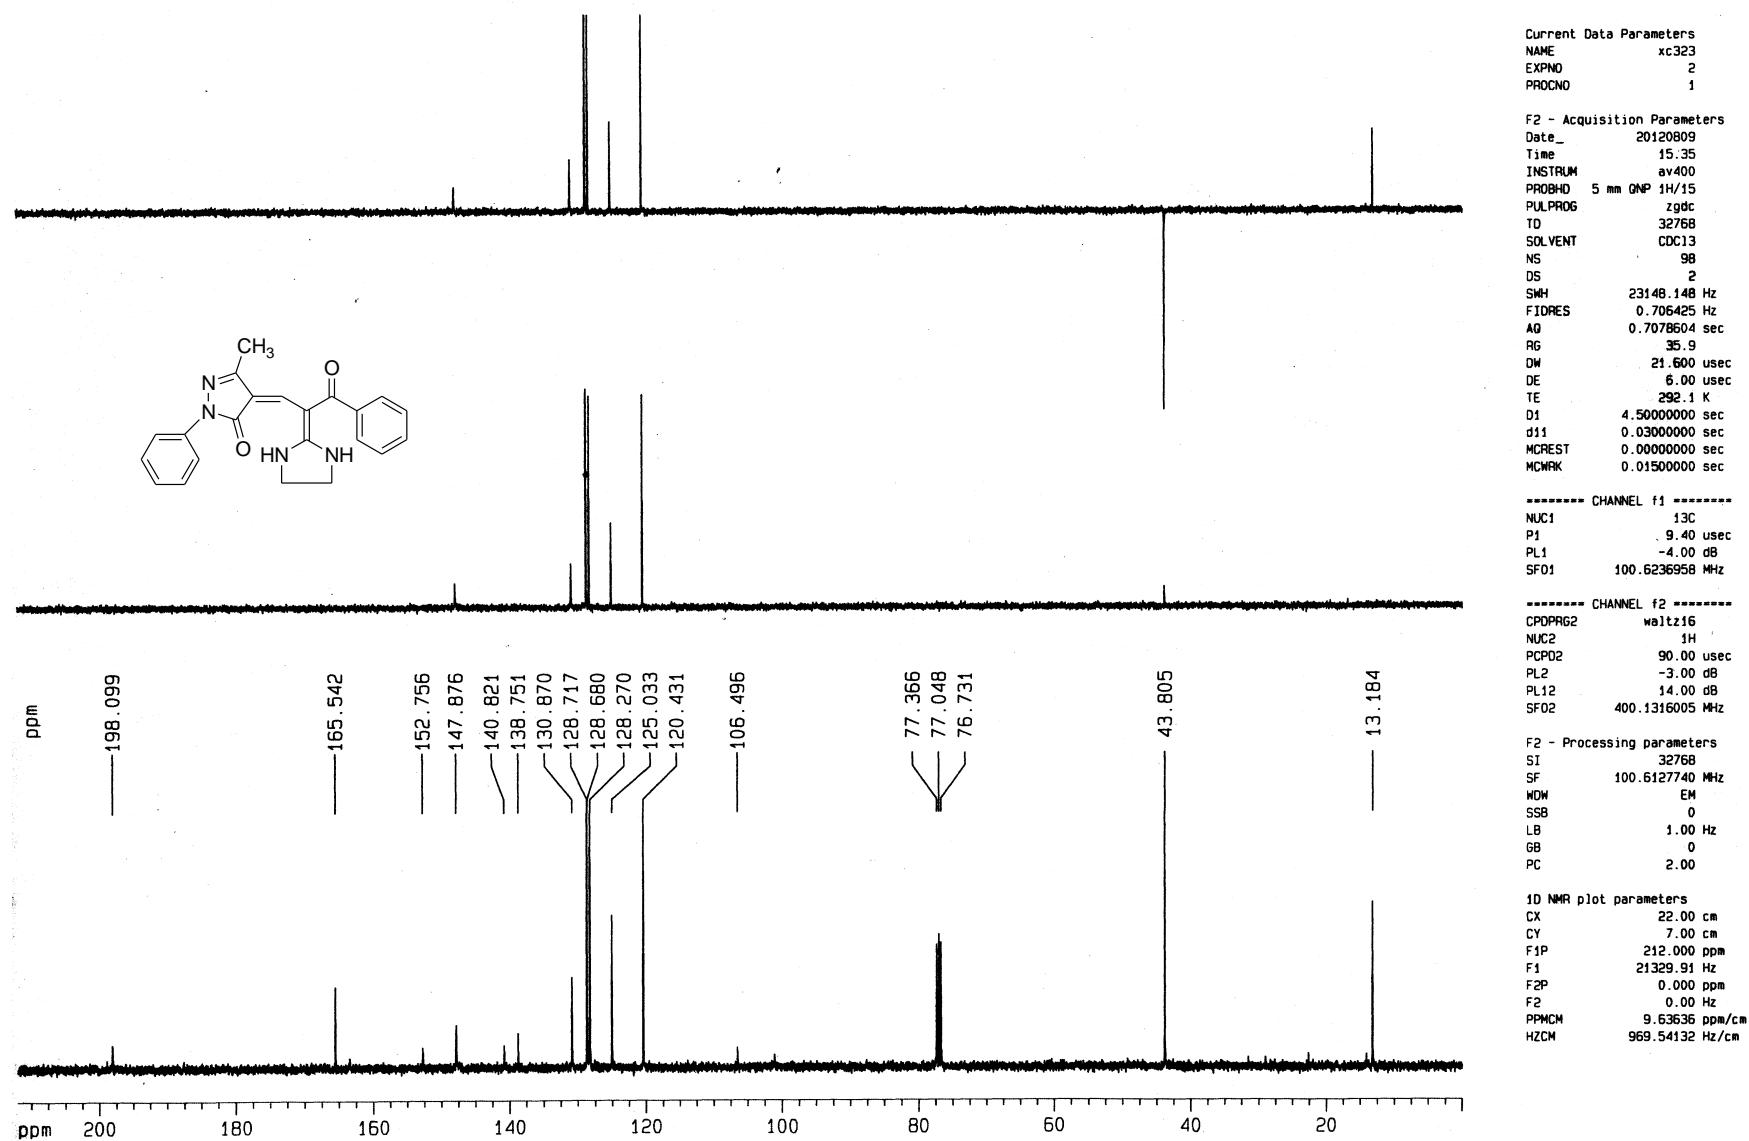

Figure 6. <sup>13</sup>C NMR (100 MHz, CDCl<sub>3</sub>) spectra of compound 6c



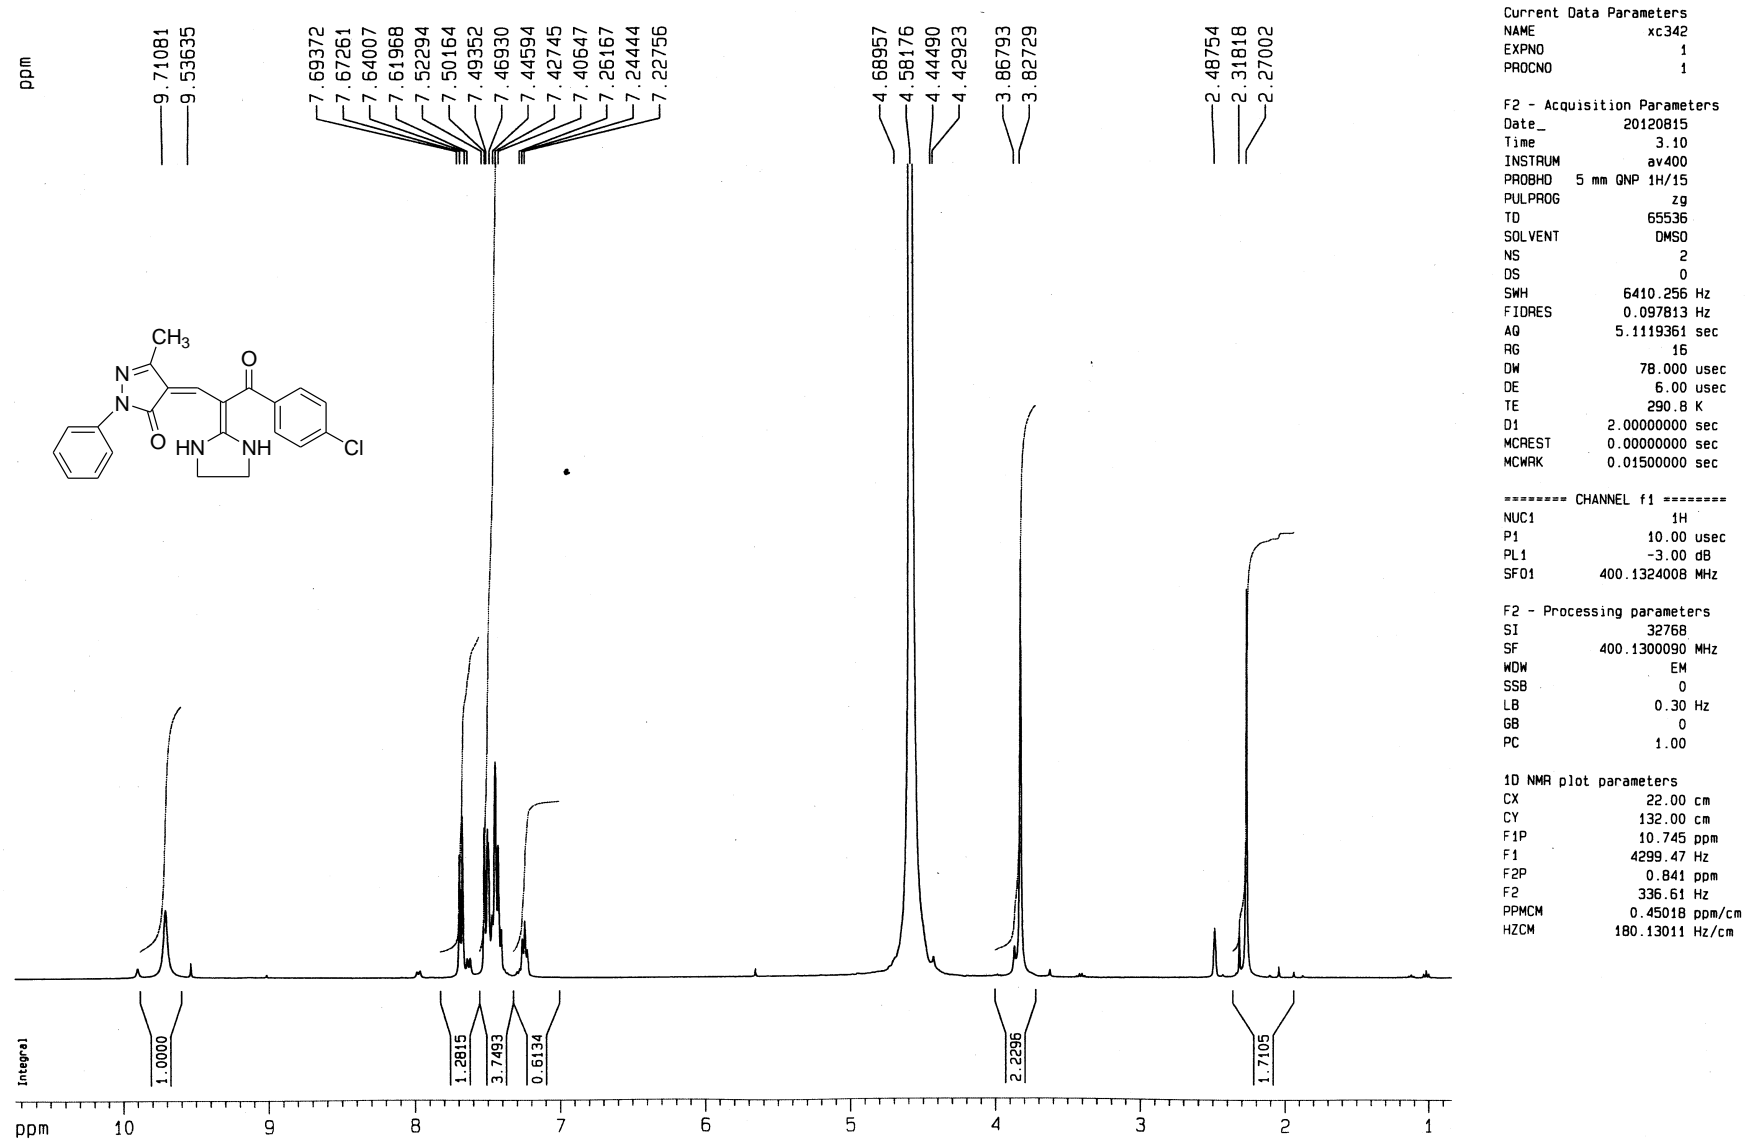

Figure 7. <sup>1</sup>H NMR (400 MHz, DMSO-*d*<sub>6</sub>) spectra of compound **6d**

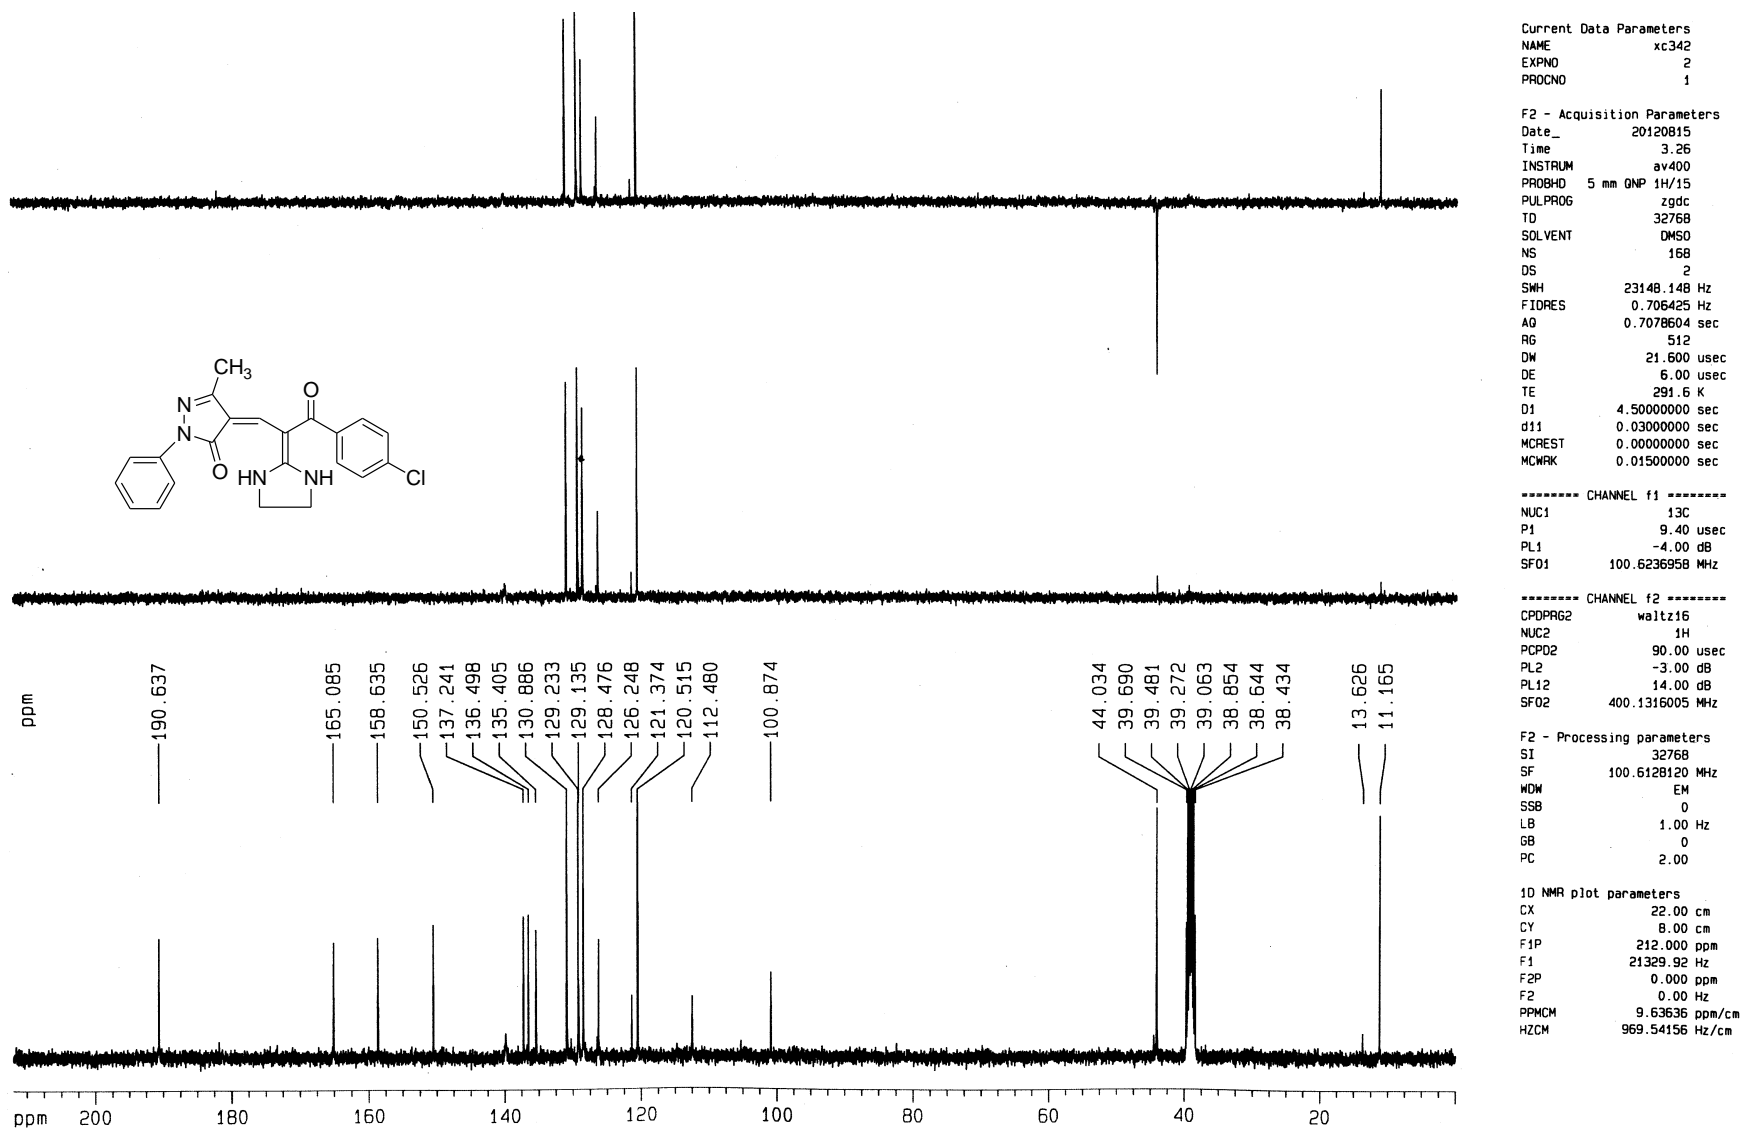

Figure 8.  $^{13}\text{C}$  NMR (100 MHz,  $\text{DMSO-}d_6$ ) spectra of compound 6d

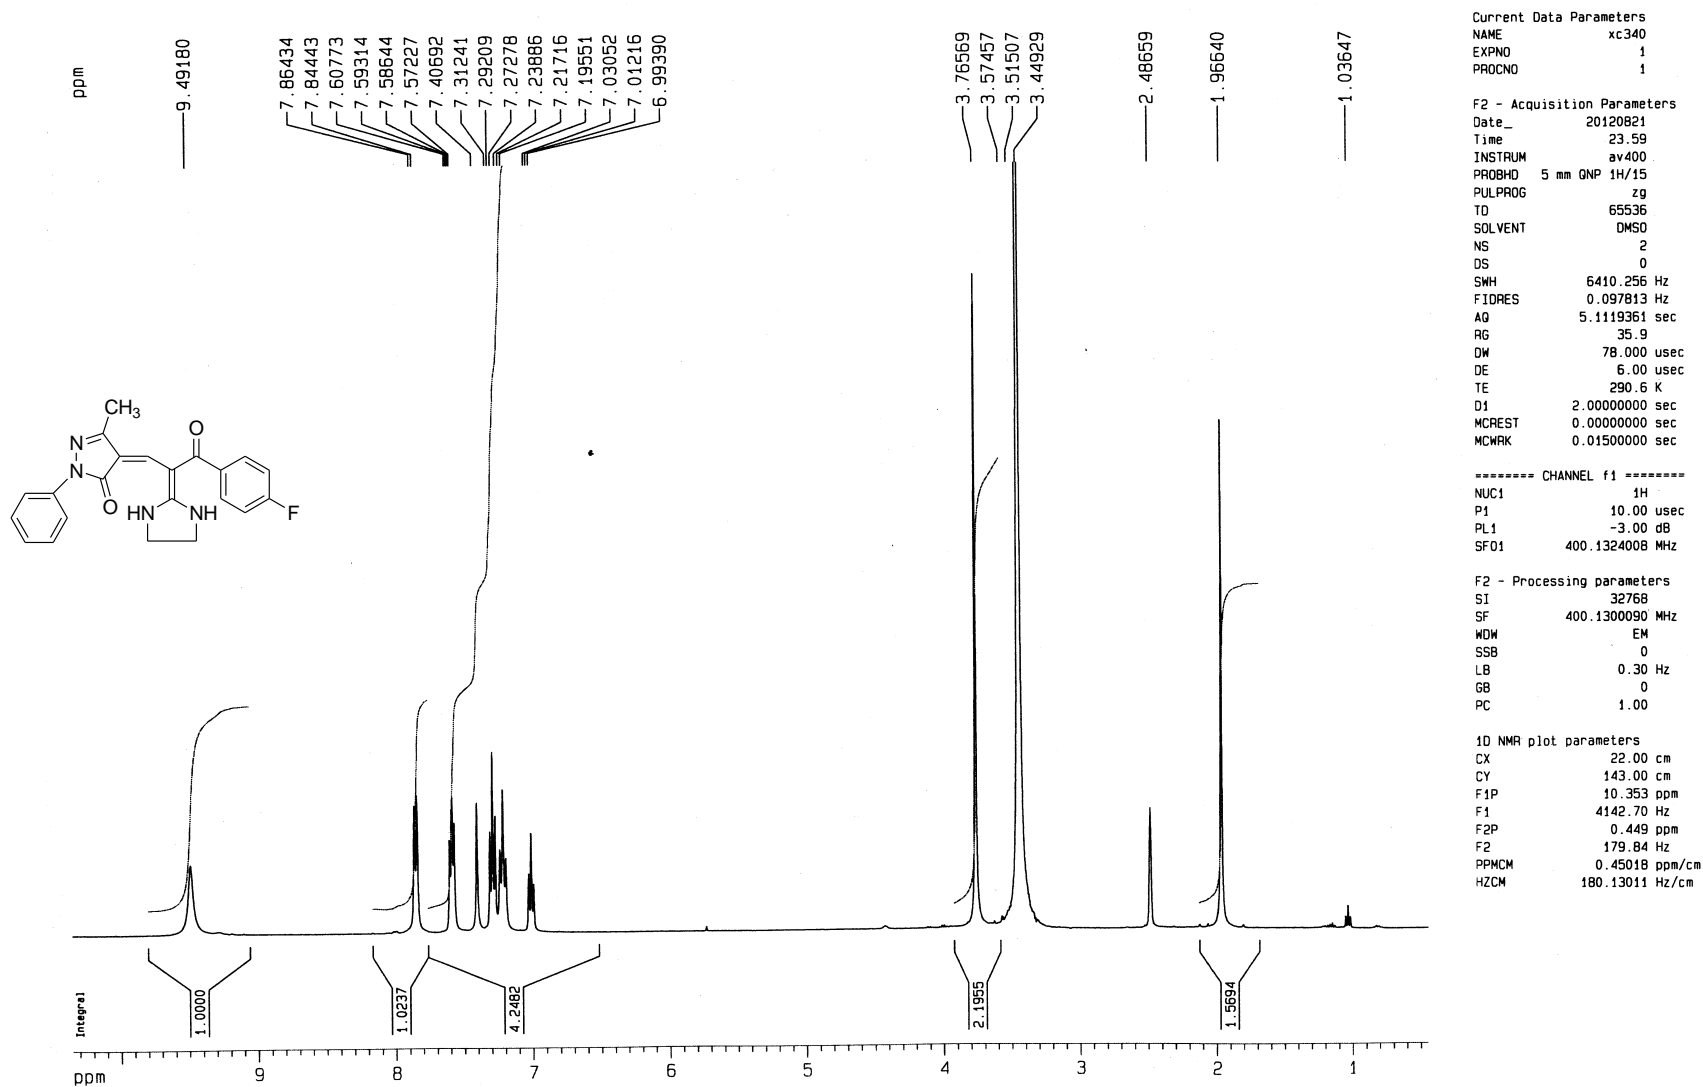

Figure 9.  $^1\text{H}$  NMR (400 MHz,  $\text{DMSO-}d_6$ ) spectra of compound 6e

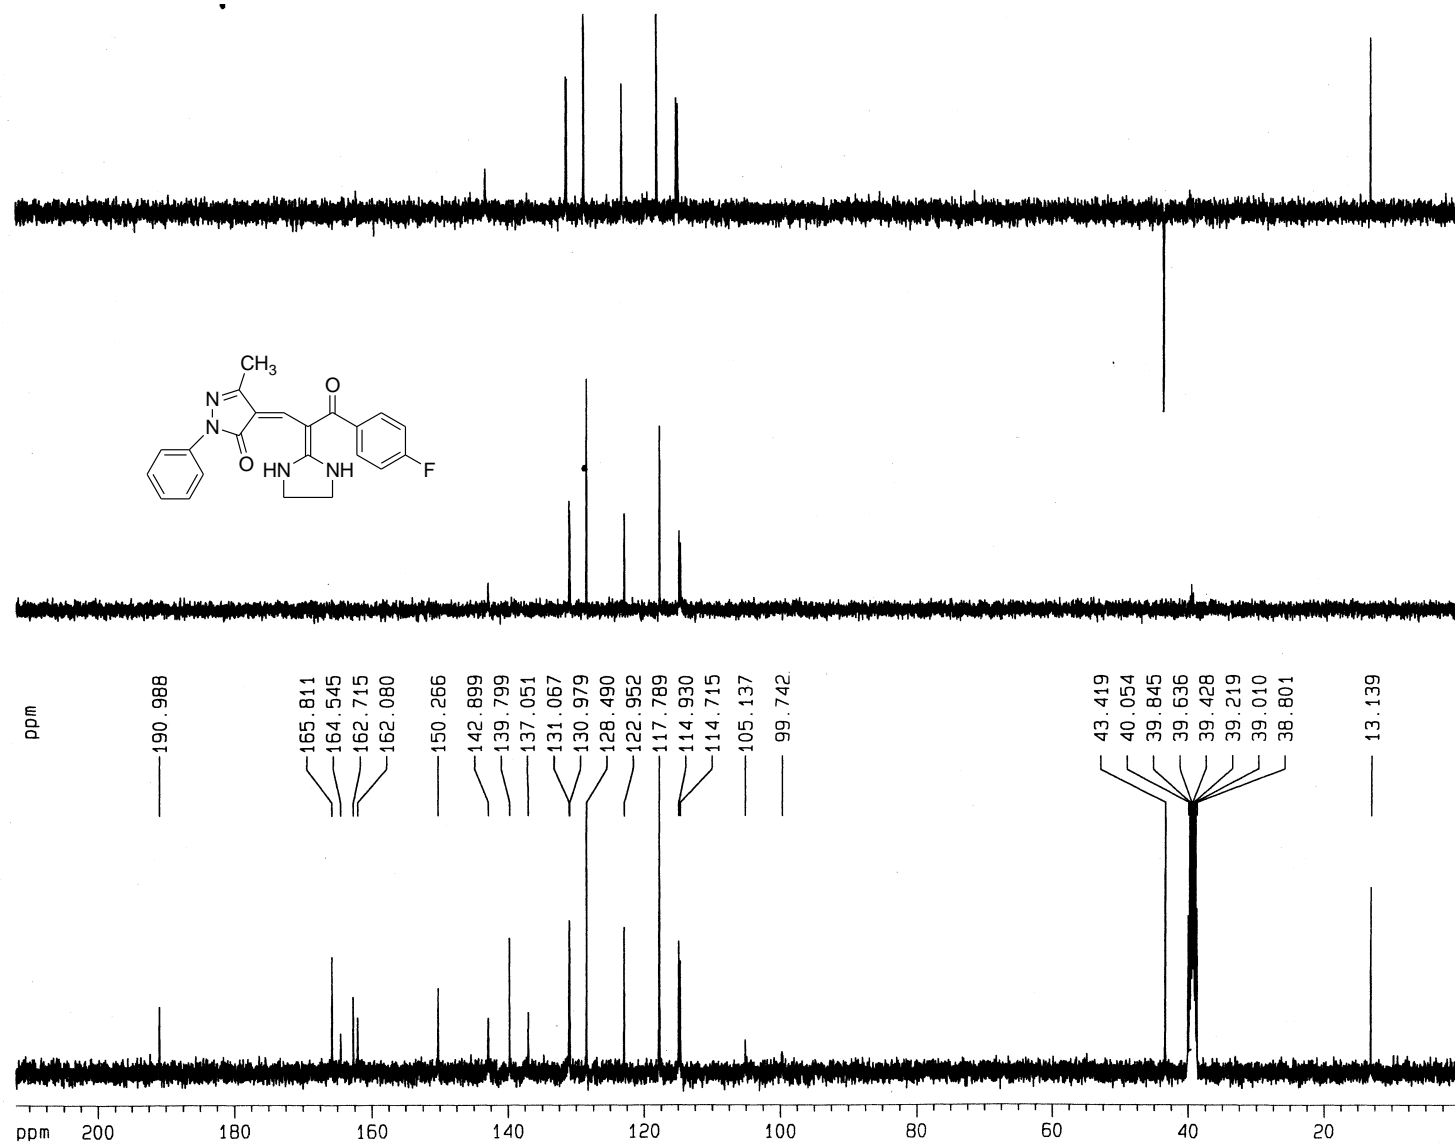

Current Data Parameters  
NAME xc340  
EXPNO 2  
PROCNO 1

F2 - Acquisition Parameters  
Date\_ 20120822  
Time 0.14  
INSTRUM av400  
PROBHD 5 mm QNP 1H/15  
PULPROG zgdc  
TD 32768  
SOLVENT DMSO  
NS 154  
DS 2  
SWH 23148.148 Hz  
FIDRES 0.706425 Hz  
AQ 0.7078604 sec  
RG 57  
DW 21.600 usec  
DE 6.00 usec  
TE 291.3 K  
D1 4.5000000 sec  
d11 0.0300000 sec  
MCREST 0.0000000 sec  
MCWPK 0.0150000 sec

----- CHANNEL f1 -----  
NUC1 13C  
P1 9.40 usec  
PL1 -4.00 dB  
SFO1 100.6236958 MHz

----- CHANNEL f2 -----  
CPDPRG2 waltz16  
NUC2 1H  
PCPD2 90.00 usec  
PL2 -3.00 dB  
PL12 14.00 dB  
SFO2 400.1316005 MHz

F2 - Processing parameters  
SI 32768  
SF 100.6128120 MHz  
WDW EM  
SSB 0  
LB 1.00 Hz  
GB 0  
PC 1.10

1D NMR plot parameters  
CX 22.00 cm  
CY 6.00 cm  
F1P 212.000 ppm  
F1 21329.92 Hz  
F2P 0.000 ppm  
F2 0.00 Hz  
PPMCM 9.63636 ppm/cm  
HZCM 969.54156 Hz/cm

Figure 10.  $^{13}\text{C}$  NMR (100 MHz,  $\text{DMSO}-d_6$ ) spectra of compound **6e**

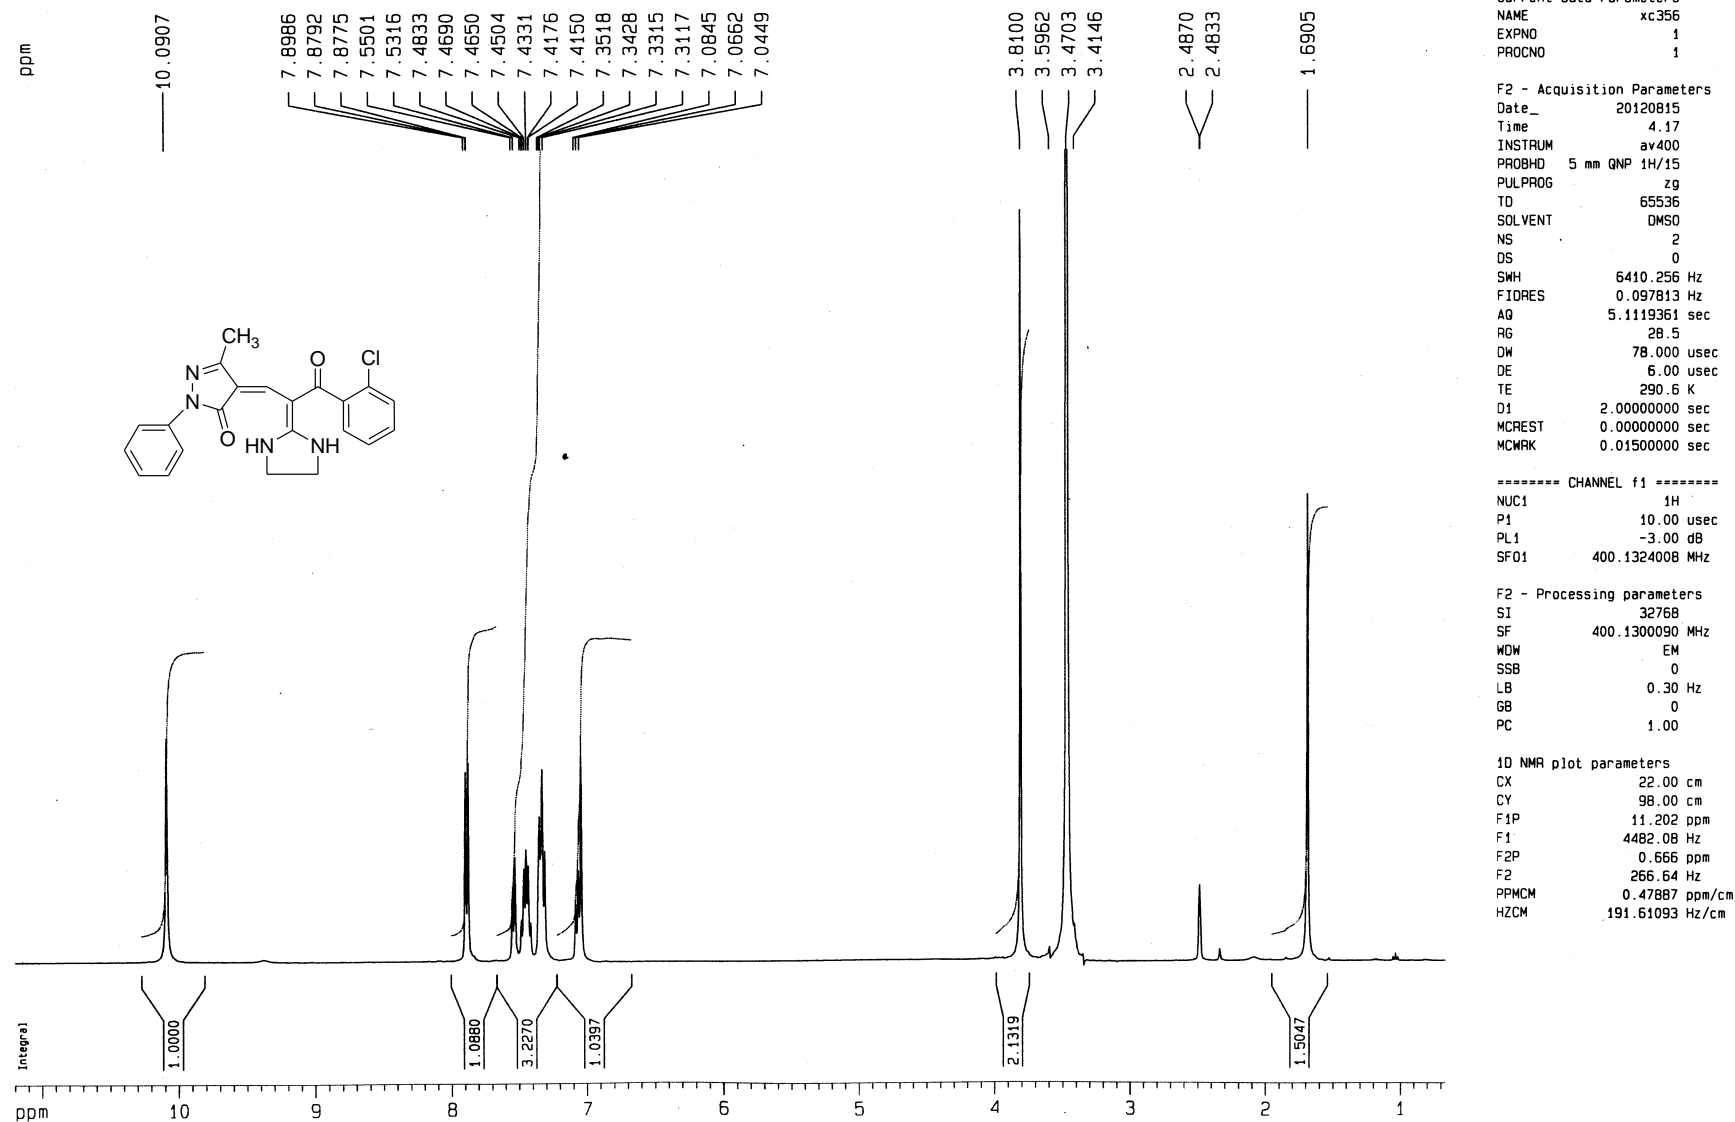

Figure 11.  $^1\text{H}$  NMR (400 MHz,  $\text{DMSO-}d_6$ ) spectra of compound **6f**

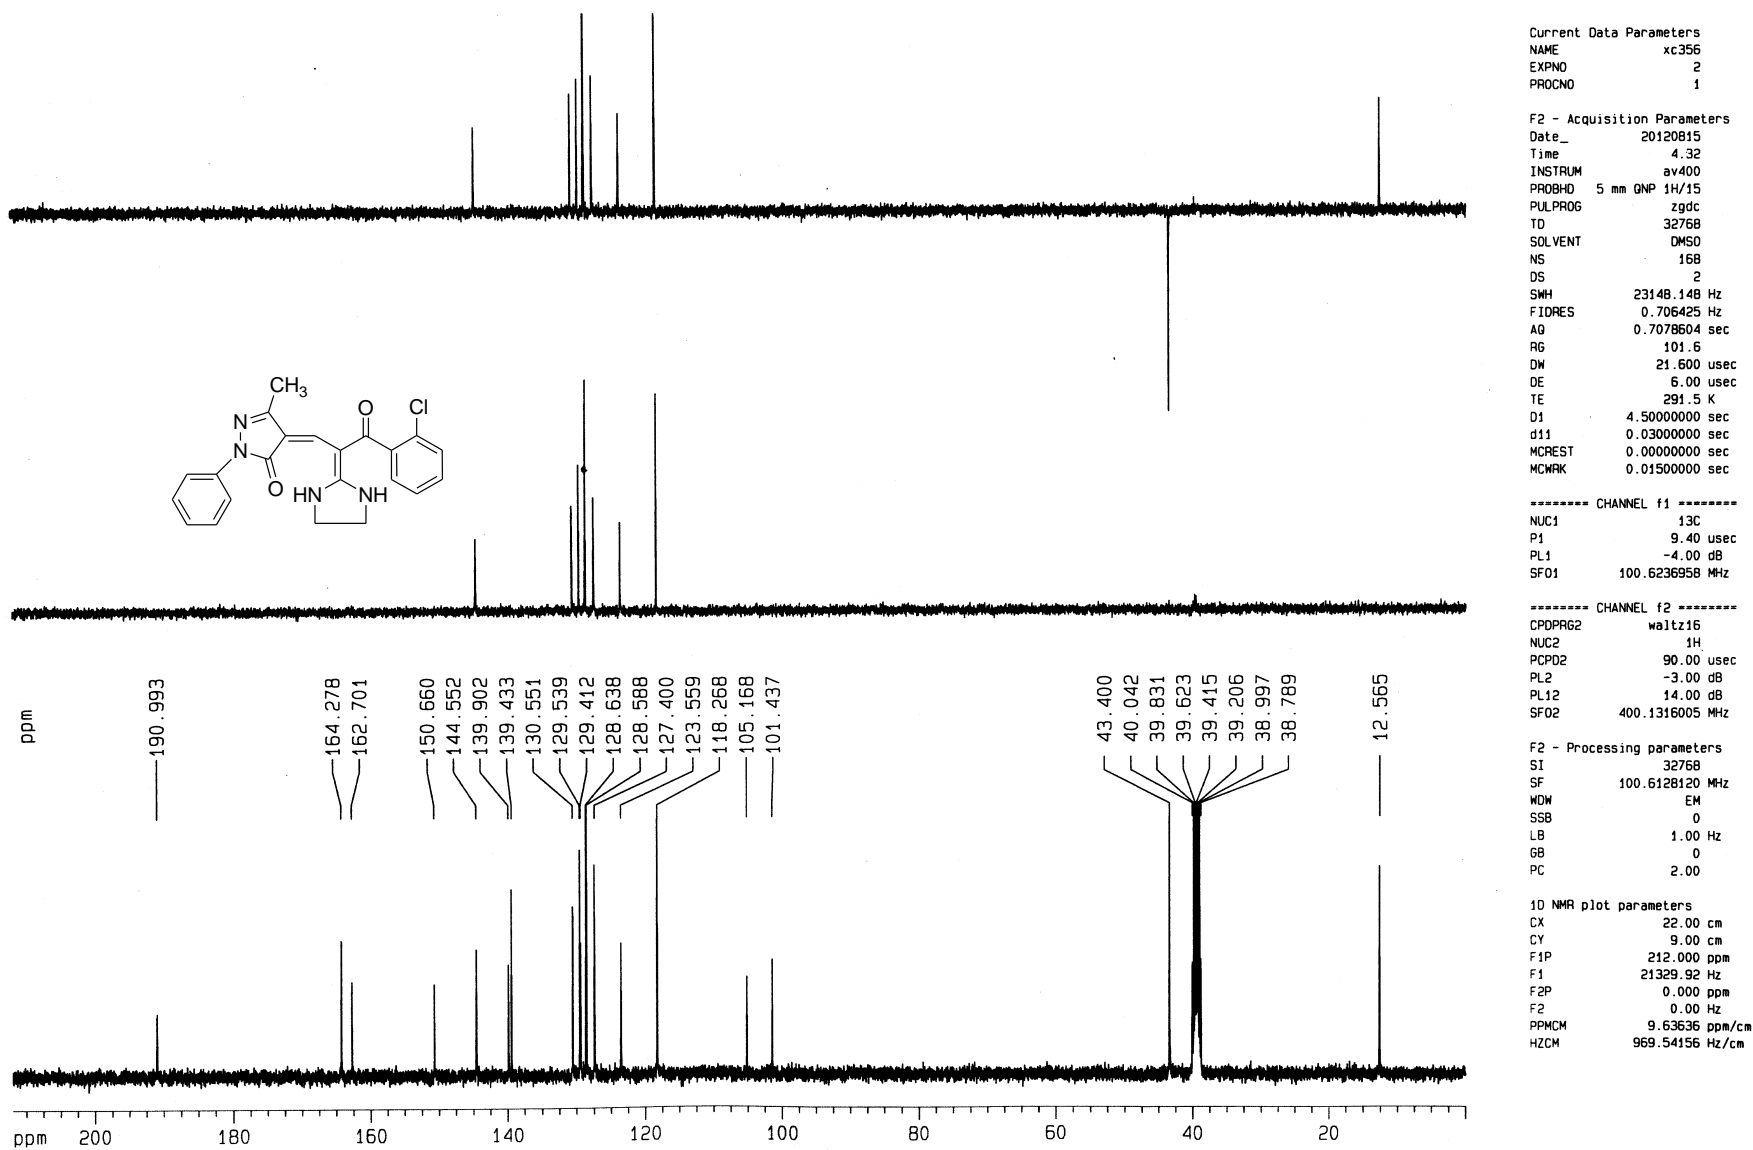

Figure 12.  $^{13}\text{C}$  NMR (100 MHz,  $\text{DMSO}-d_6$ ) spectra of compound 6f

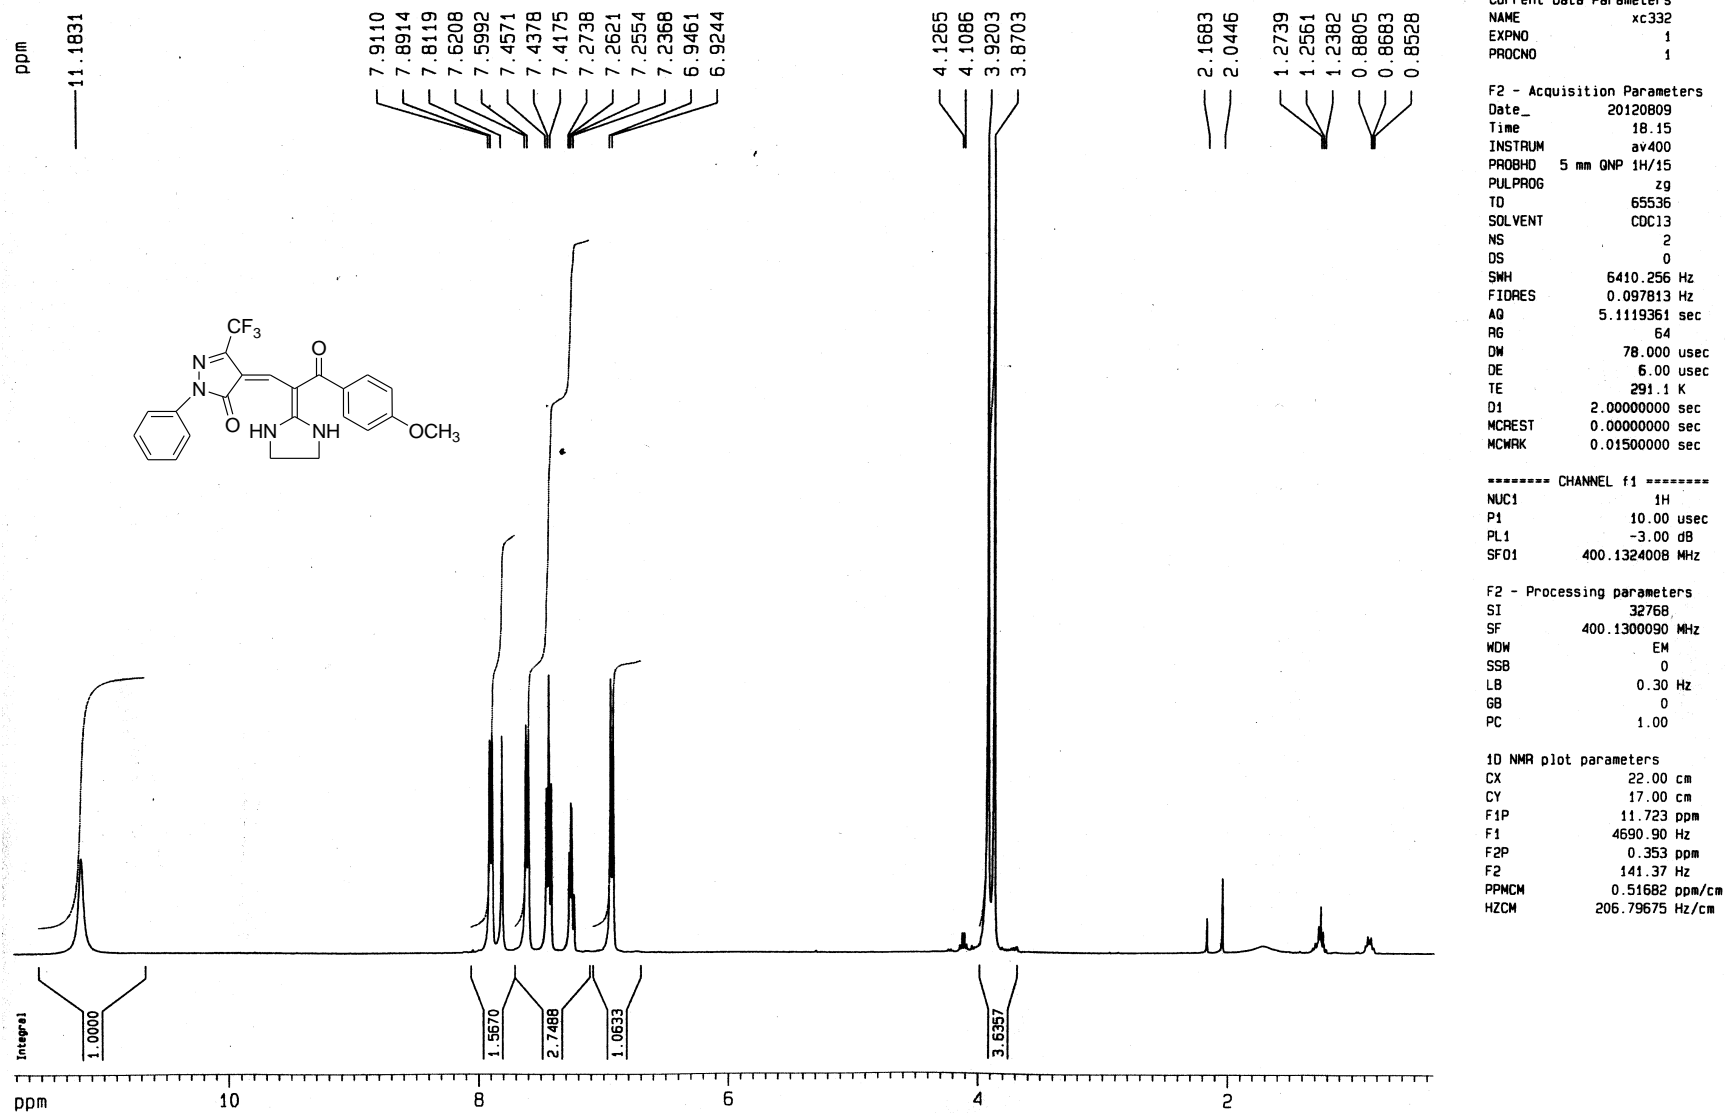

Figure 13. <sup>1</sup>H NMR (400 MHz, CDCl<sub>3</sub>) spectra of compound 6g

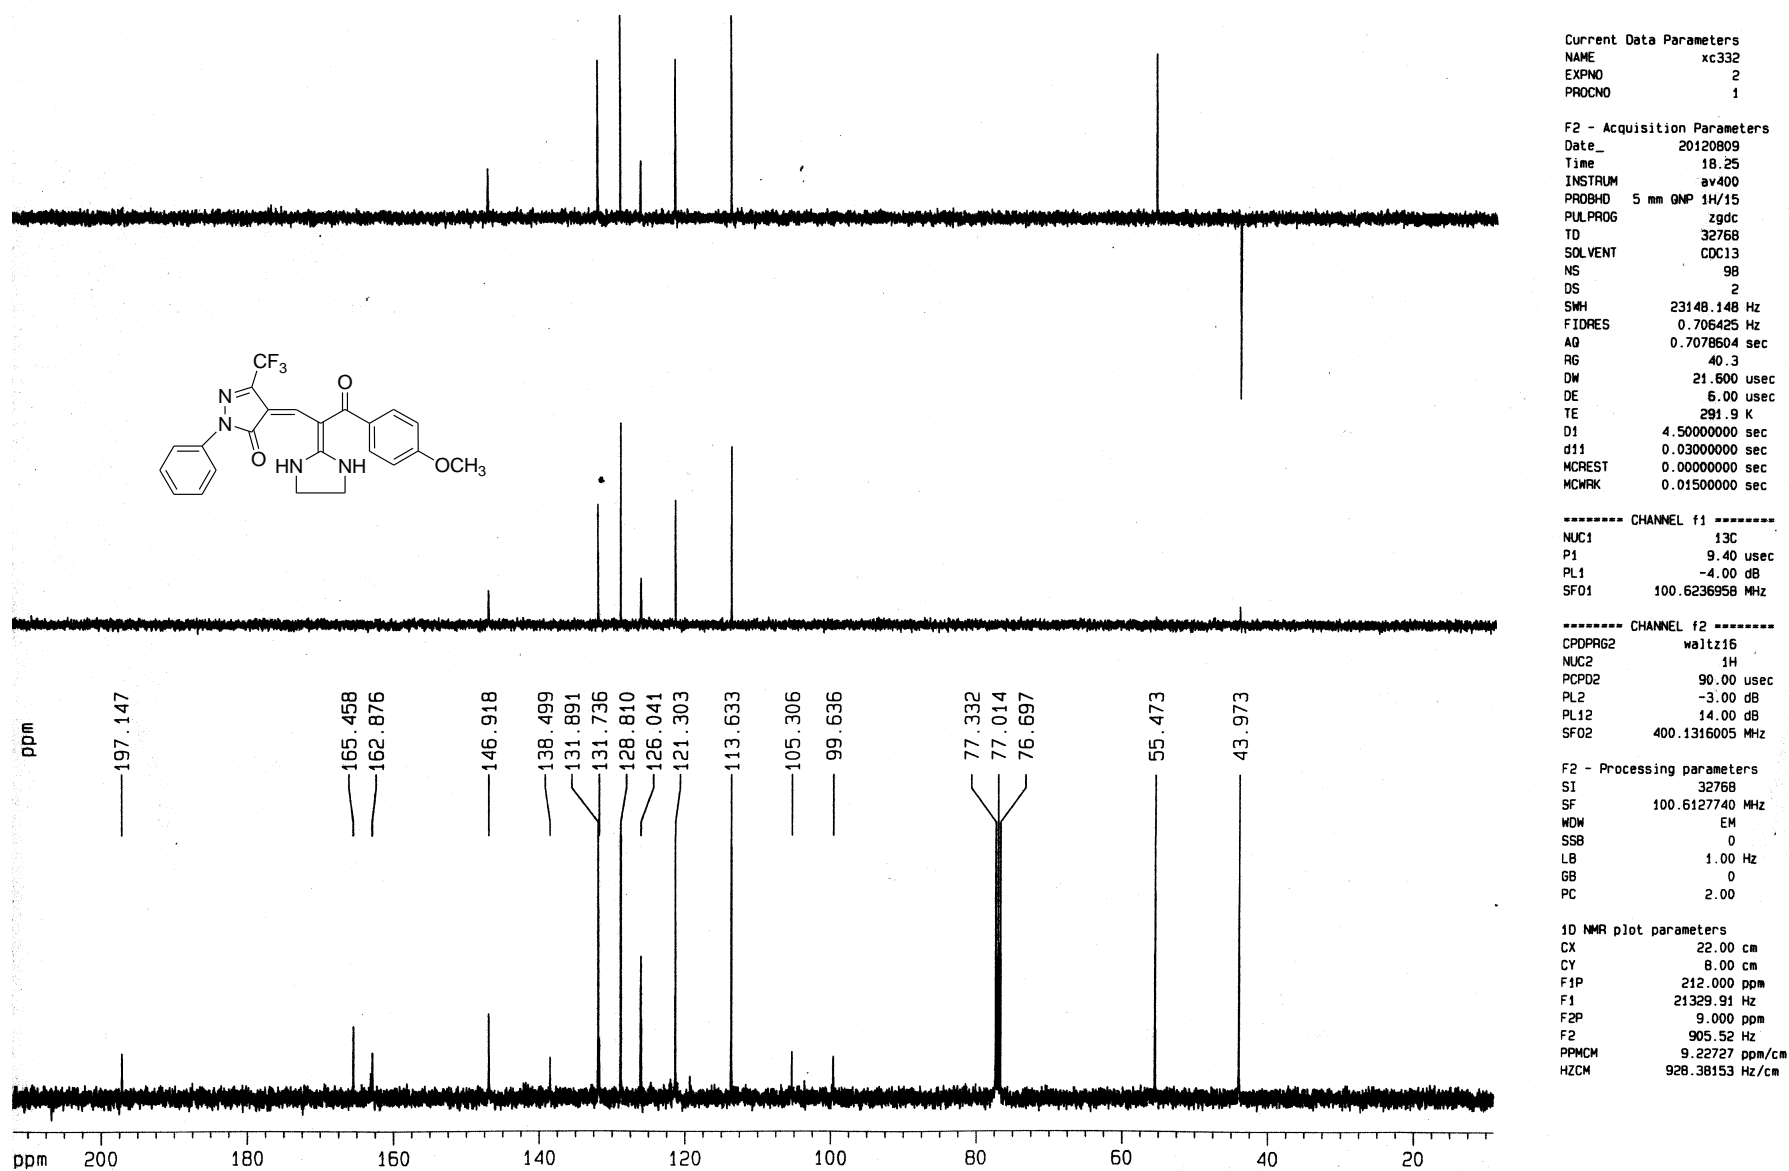

Figure 14. <sup>13</sup>C NMR (100 MHz, CDCl<sub>3</sub>) spectra of compound 6g



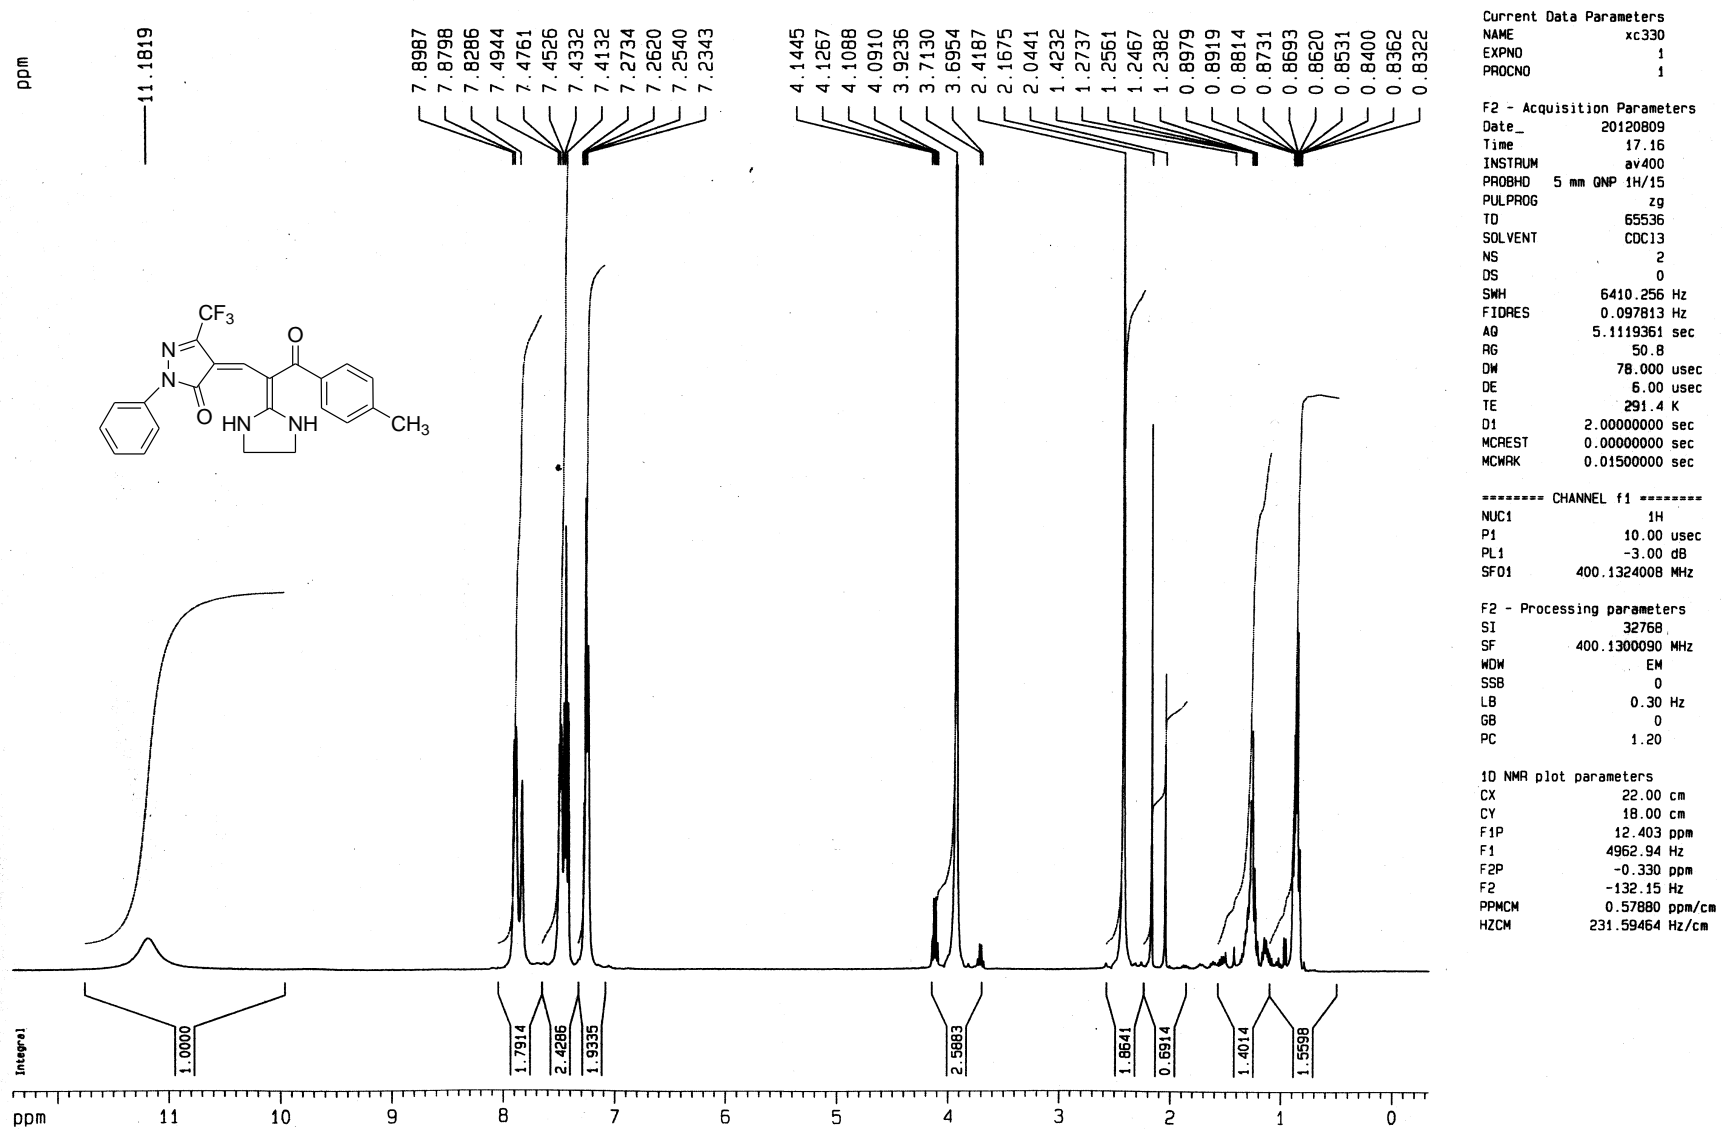

Figure 15. <sup>1</sup>H NMR (400 MHz, CDCl<sub>3</sub>) spectra of compound 6h

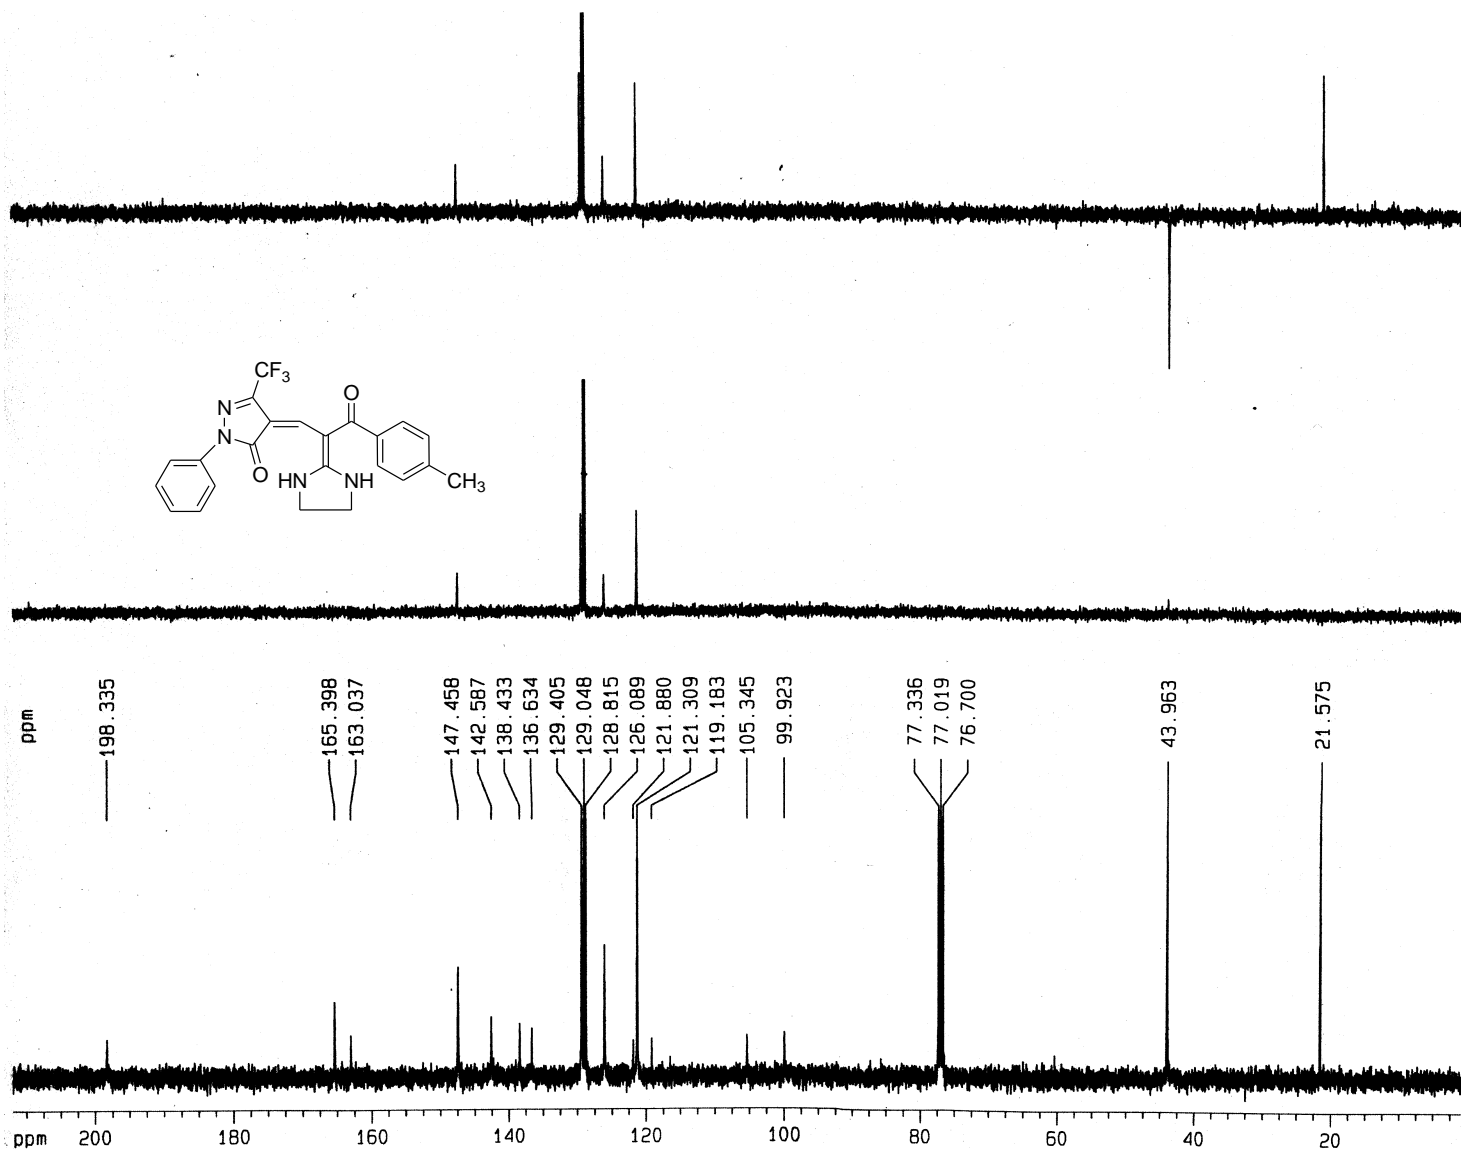

Current Data Parameters  
NAME xc330  
EXPNO 2  
PROCNO 1

F2 - Acquisition Parameters  
Date\_ 20120809  
Time 17.24  
INSTRUM av400  
PROBHD 5 mm QNP 1H/15  
PULPROG zgdc  
TD 32768  
SOLVENT CDCl3  
NS 202  
DS 2  
SWH 23148.148 Hz  
FIDRES 0.706425 Hz  
AQ 0.7078604 sec  
RG 128  
DW 21.600 usec  
DE 6.00 usec  
TE 292.2 K  
D1 4.5000000 sec  
d11 0.0300000 sec  
MCREST 0.0000000 sec  
MCWFK 0.0150000 sec

----- CHANNEL f1 -----  
NUC1 13C  
P1 9.40 usec  
PL1 -4.00 dB  
SFO1 100.6236958 MHz

----- CHANNEL f2 -----  
CPDPRG2 waltz16  
NUC2 1H  
PCPD2 90.00 usec  
PL2 -3.00 dB  
PL12 14.00 dB  
SFO2 400.1316005 MHz

F2 - Processing parameters  
SI 32768  
SF 100.6127740 MHz  
WDW EM  
SSB 0  
LB 1.00 Hz  
GB 0  
PC 1.40

1D NMR plot parameters  
CX 22.00 cm  
CY 15.00 cm  
F1P 212.000 ppm  
F1 21329.91 Hz  
F2P 0.000 ppm  
F2 0.00 Hz  
PPMCH 9.63636 ppm/cm  
HZCM 969.54132 Hz/cm

Figure 16. <sup>13</sup>C NMR (100 MHz, CDCl<sub>3</sub>) spectra of compound 6h

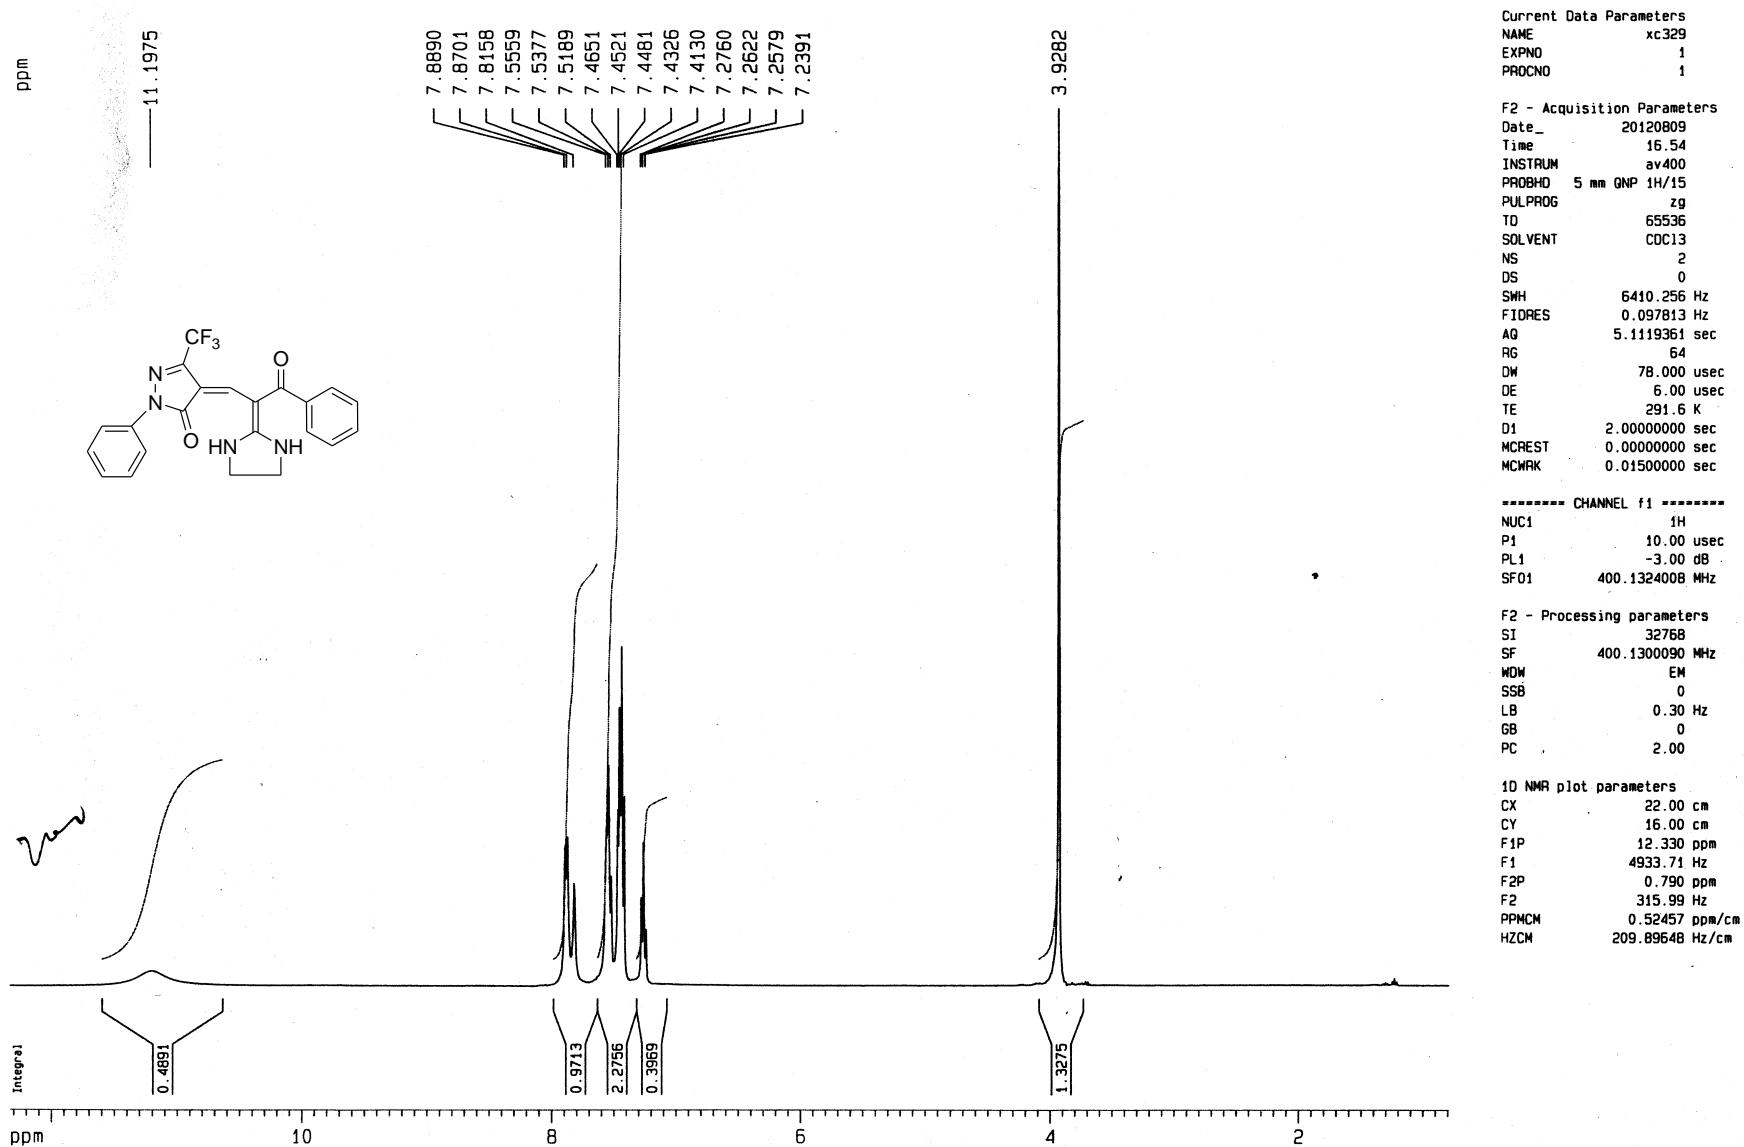

Figure 17. <sup>1</sup>H NMR (400 MHz, CDCl<sub>3</sub>) spectra of compound **6i**

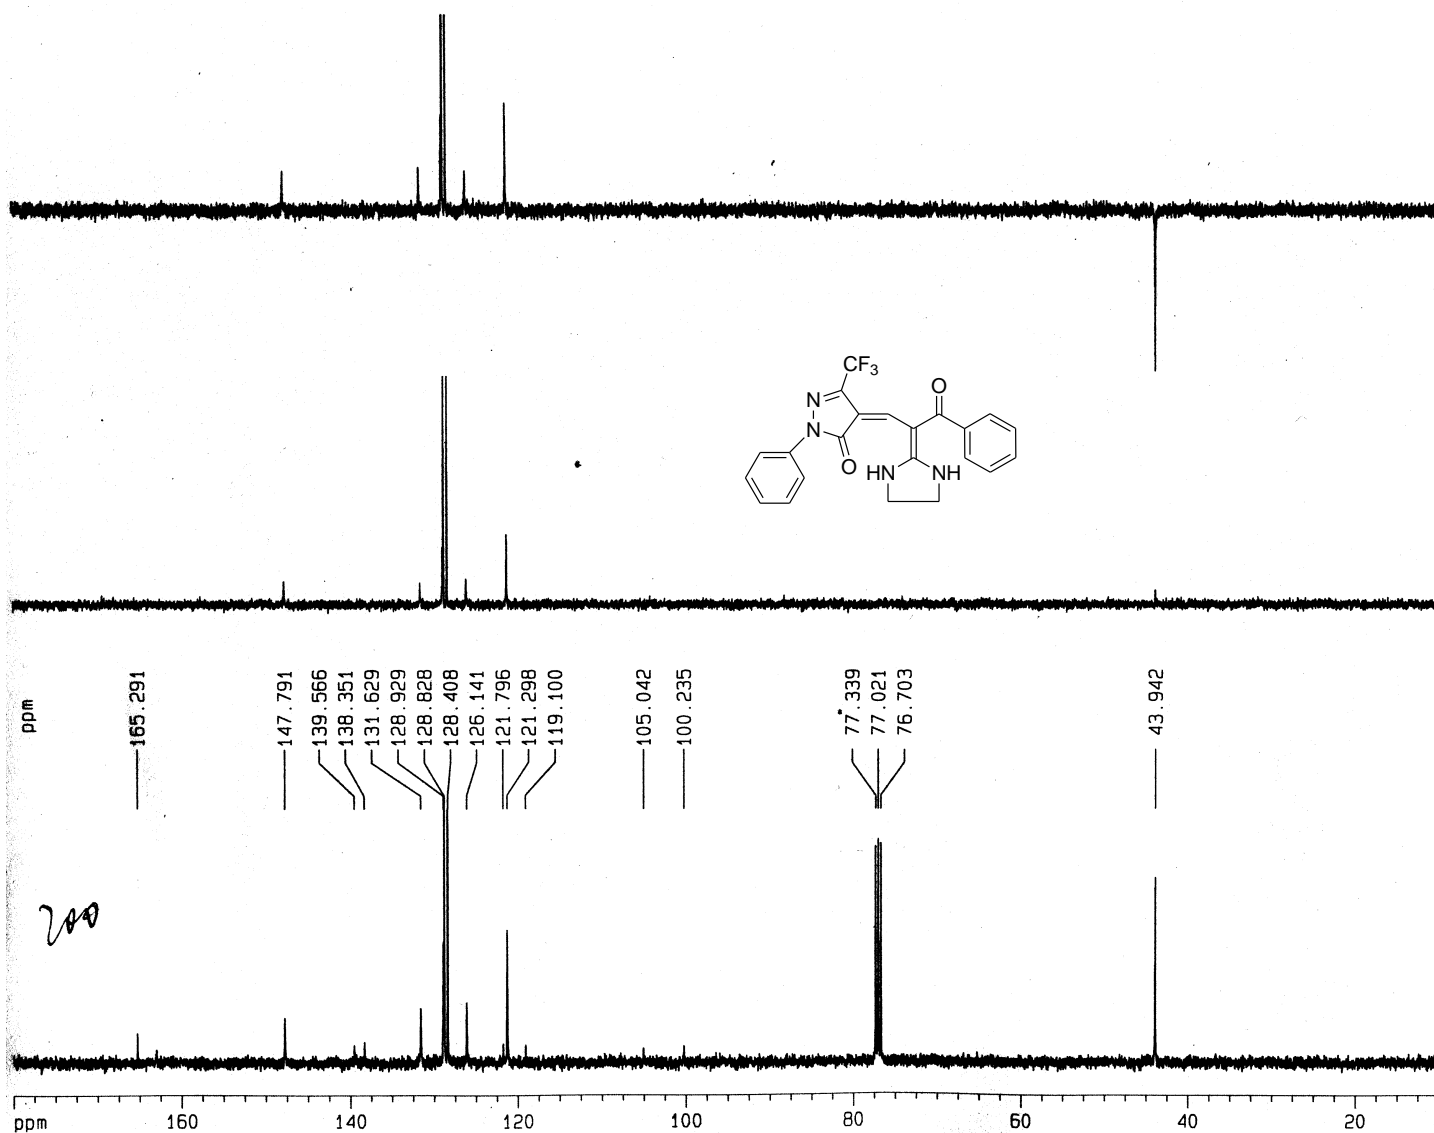

Current Data Parameters  
NAME xc329  
EXPNO 2  
PROCNO 1

F2 - Acquisition Parameters  
Date\_ 20120809  
Time 17.04  
INSTRUM av400  
PROBHD 5 mm GNP 1H/15  
PULPROG zgdc  
TD 32768  
SOLVENT CDCl3  
NS 98  
DS 2  
SMH 23148.148 Hz  
FIDRES 0.706425 Hz  
AQ 0.7078604 sec  
RG 40.3  
DM 21.600 usec  
DE 6.00 usec  
TE 292.3 K  
D1 4.50000000 sec  
d11 0.03000000 sec  
MCREST 0.00000000 sec  
MCWFK 0.01500000 sec

----- CHANNEL f1 -----  
NUC1 13C  
P1 9.40 usec  
PL1 -4.00 dB  
SF01 100.6236958 MHz

----- CHANNEL f2 -----  
CPDPRG2 waltz16  
NUC2 1H  
PCPD2 90.00 usec  
PL2 -3.00 dB  
PL12 14.00 dB  
SF02 400.1316005 MHz

F2 - Processing parameters  
SI 32768  
SF 100.6127740 MHz  
WDW EM  
SSB 0  
LB 1.00 Hz  
GB 0  
PC 1.40

1D NMR plot parameters  
CX 22.00 cm  
CY 7.00 cm  
F1P 180.000 ppm  
F1 18110.30 Hz  
F2P 9.000 ppm  
F2 905.52 Hz  
PPMCM 7.77273 ppm/cm  
HZCM 782.03571 Hz/cm

Figure 18.  $^{13}\text{C}$  NMR (100 MHz,  $\text{CDCl}_3$ ) spectra of compound **6i**

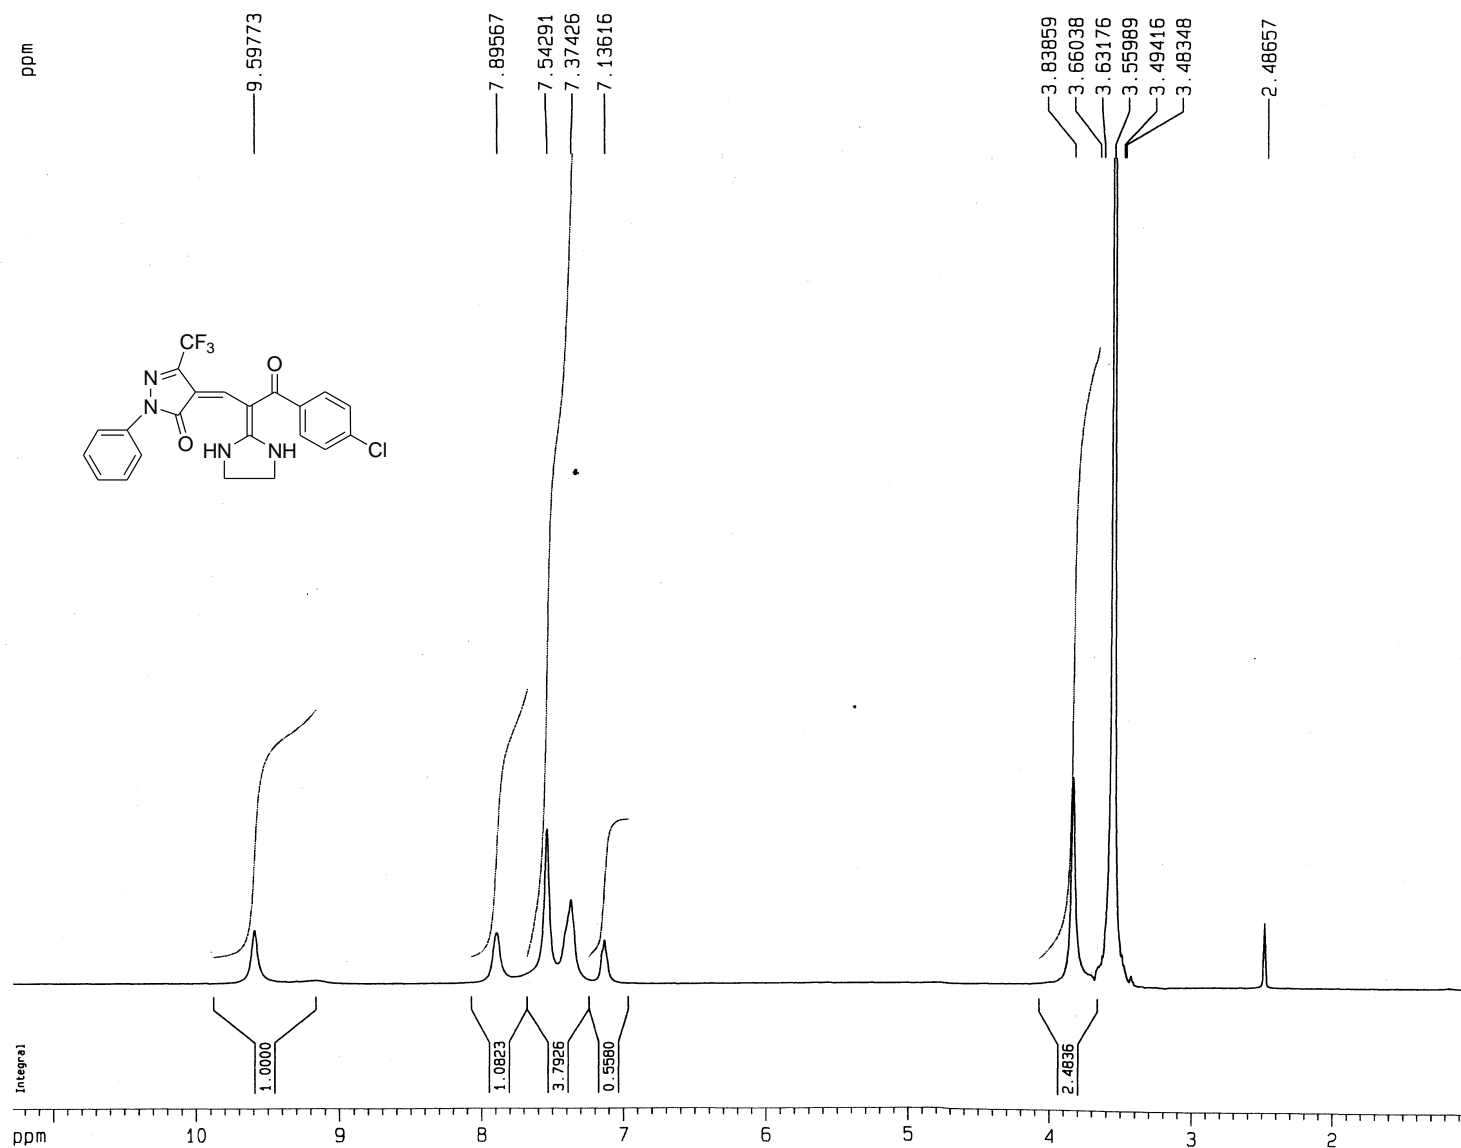

Current Data Parameters  
NAME xc331  
EXPNO 5  
PROCNO 1

F2 - Acquisition Parameters  
Date\_ 20120821  
Time 22.20  
INSTRUM av400  
PROBHD 5 mm QNP 1H/15  
PULPROG zg  
TD 65536  
SOLVENT DMSO  
NS 2  
DS 0  
SWH 6410.256 Hz  
FIDRES 0.097813 Hz  
AQ 5.1119361 sec  
RG 22.6  
DW 78.000 usec  
DE 6.00 usec  
TE 290.4 K  
D1 2.0000000 sec  
MCREST 0.0000000 sec  
MCWRK 0.0150000 sec

==== CHANNEL f1 =====  
NUC1 1H  
P1 10.00 usec  
PL1 -3.00 dB  
SF01 400.1324008 MHz

F2 - Processing parameters  
SI 32768  
SF 400.1300090 MHz  
WDW EM  
SSB 0  
LB 0.30 Hz  
GB 0  
PC 1.00

1D NMR plot parameters  
CX 22.00 cm  
CY 143.00 cm  
F1P 11.289 ppm  
F1 4517.21 Hz  
F2P 0.994 ppm  
F2 397.58 Hz  
PPMCM 0.46799 ppm/cm  
HZCM 187.25615 Hz/cm

Figure 19. <sup>1</sup>H NMR (400 MHz, DMSO-*d*<sub>6</sub>) spectra of compound **6j**

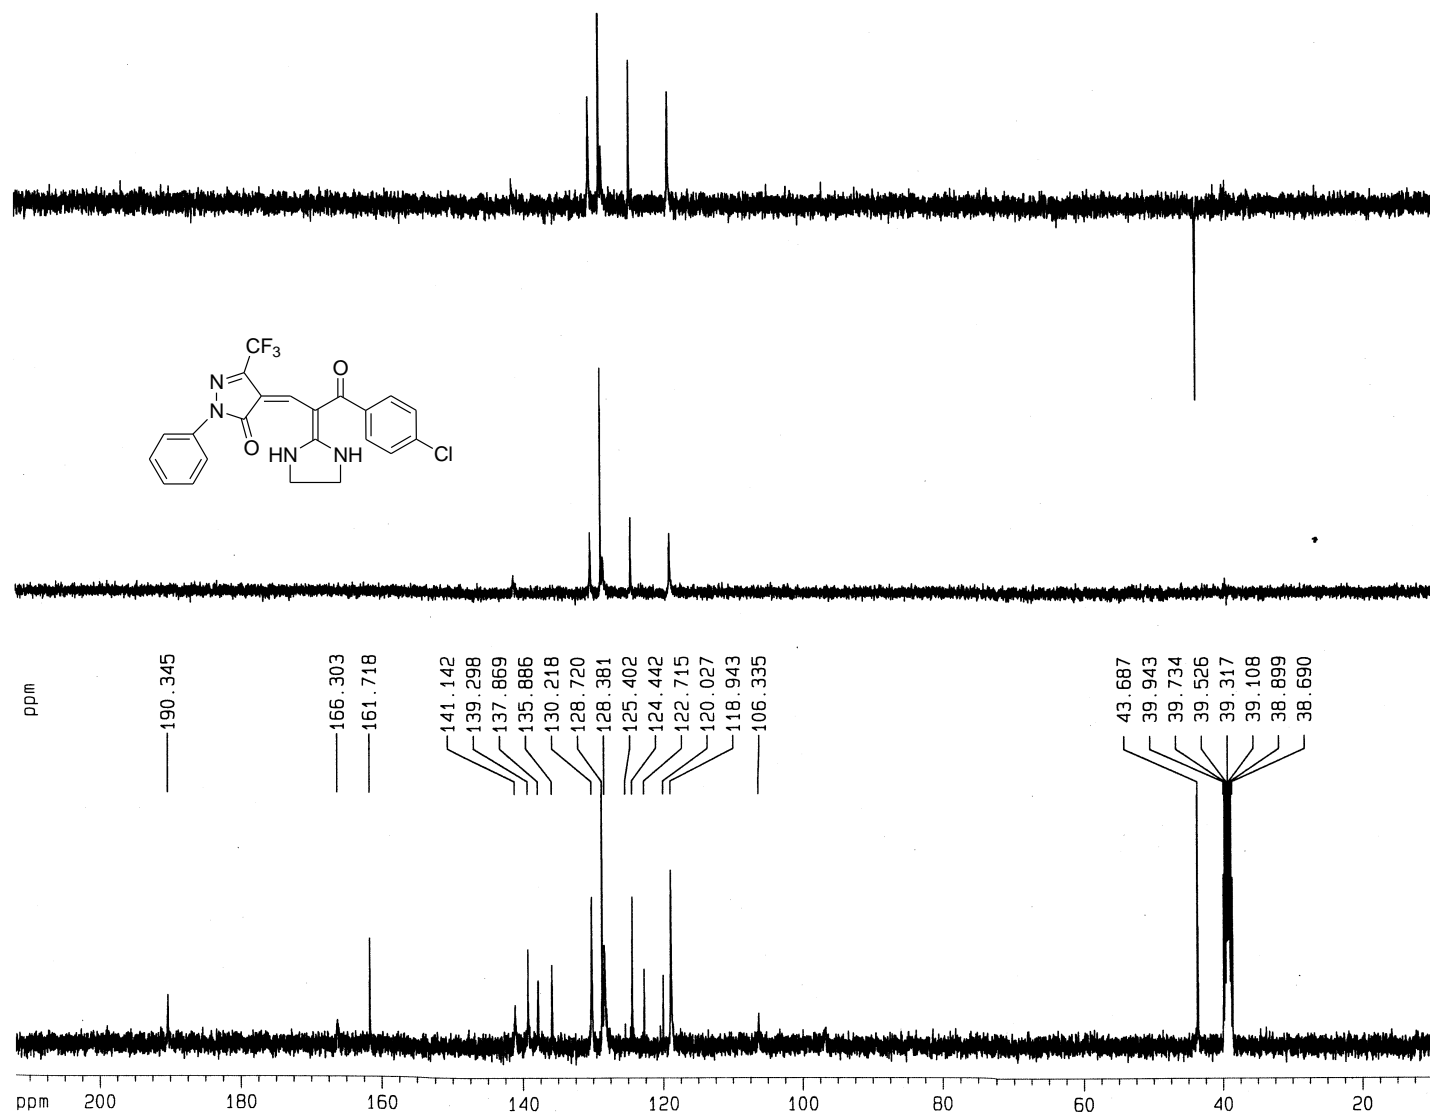

Current Data Parameters  
 NAME xc331  
 EXPNO 6  
 PROCNO 1

F2 - Acquisition Parameters  
 Date\_ 20120821  
 Time 22.36  
 INSTRUM av400  
 PROBHD 5 mm GNP 1H/15  
 PULPROG zgdc  
 TD 32768  
 SOLVENT DMSO  
 NS 165  
 DS 2  
 SWH 23148.148 Hz  
 FIDRES 0.706425 Hz  
 AQ 0.7078604 sec  
 RG 114  
 DM 21.600 usec  
 DE 6.00 usec  
 TE 291.2 K  
 D1 4.5000000 sec  
 d11 0.0300000 sec  
 MCREST 0.0000000 sec  
 MCWRK 0.0150000 sec

----- CHANNEL f1 -----  
 NUC1 13C  
 P1 9.40 usec  
 PL1 -4.00 dB  
 SF01 100.6236958 MHz

----- CHANNEL f2 -----  
 CPOPRG2 waltz16  
 NUC2 1H  
 PCPD2 90.00 usec  
 PL2 -3.00 dB  
 PL12 14.00 dB  
 SF02 400.1316005 MHz

F2 - Processing parameters  
 SI 32768  
 SF 100.6128120 MHz  
 WDW EM  
 SSB 0  
 LB 1.00 Hz  
 GB 0  
 PC 1.10

1D NMR plot parameters  
 CX 22.00 cm  
 CY 9.00 cm  
 F1P 212.000 ppm  
 F1 21329.92 Hz  
 F2P 9.000 ppm  
 F2 905.52 Hz  
 PRMCM 9.22727 ppm/cm  
 HZCM 928.38177 Hz/cm

Figure 20. <sup>13</sup>C NMR (100 MHz, DMSO-*d*<sub>6</sub>) spectra of compound **6j**

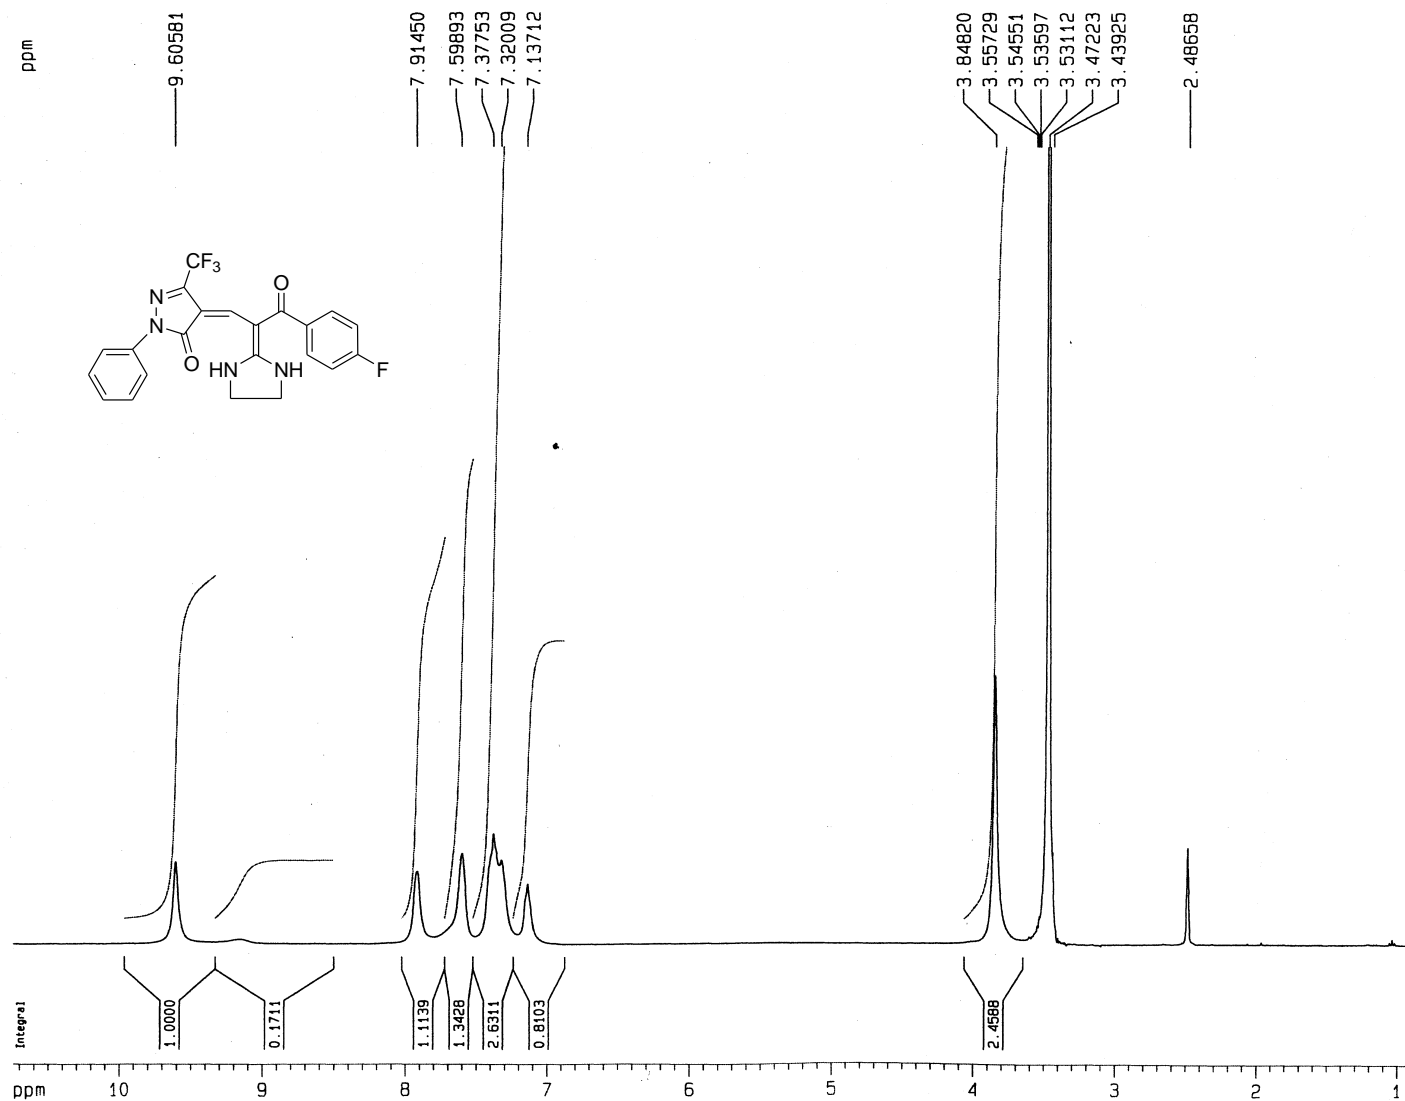

Current Data Parameters  
 NAME xc335  
 EXPNO 1  
 PROCNO 1

F2 - Acquisition Parameters  
 Date\_ 20120815  
 Time 0.58  
 INSTRUM av400  
 PROBHD 5 mm QNP 1H/15  
 PULPROG zg  
 TD 65536  
 SOLVENT DMSO  
 NS 2  
 DS 0  
 SWH 6410.256 Hz  
 FIDRES 0.097813 Hz  
 AQ 5.1119361 sec  
 RG 32  
 DW 78.000 usec  
 DE 6.00 usec  
 TE 290.9 K  
 D1 2.00000000 sec  
 MCREST 0.00000000 sec  
 MCWRK 0.01500000 sec

===== CHANNEL f1 =====  
 NUC1 1H  
 P1 10.00 usec  
 PL1 -3.00 dB  
 SFO1 400.1324008 MHz

F2 - Processing parameters  
 SI 32768  
 SF 400.1300090 MHz  
 WDW EM  
 SSB 0  
 LB 0.30 Hz  
 GB 0  
 PC 1.00

1D NMR plot parameters  
 CX 22.00 cm  
 CY 143.00 cm  
 F1P 10.745 ppm  
 F1 4299.47 Hz  
 F2P 0.841 ppm  
 F2 336.61 Hz  
 PPMCM 0.45018 ppm/cm  
 HZCM 180.13011 Hz/cm

Figure 21. <sup>1</sup>H NMR (400 MHz, DMSO-*d*<sub>6</sub>) spectra of compound **6k**

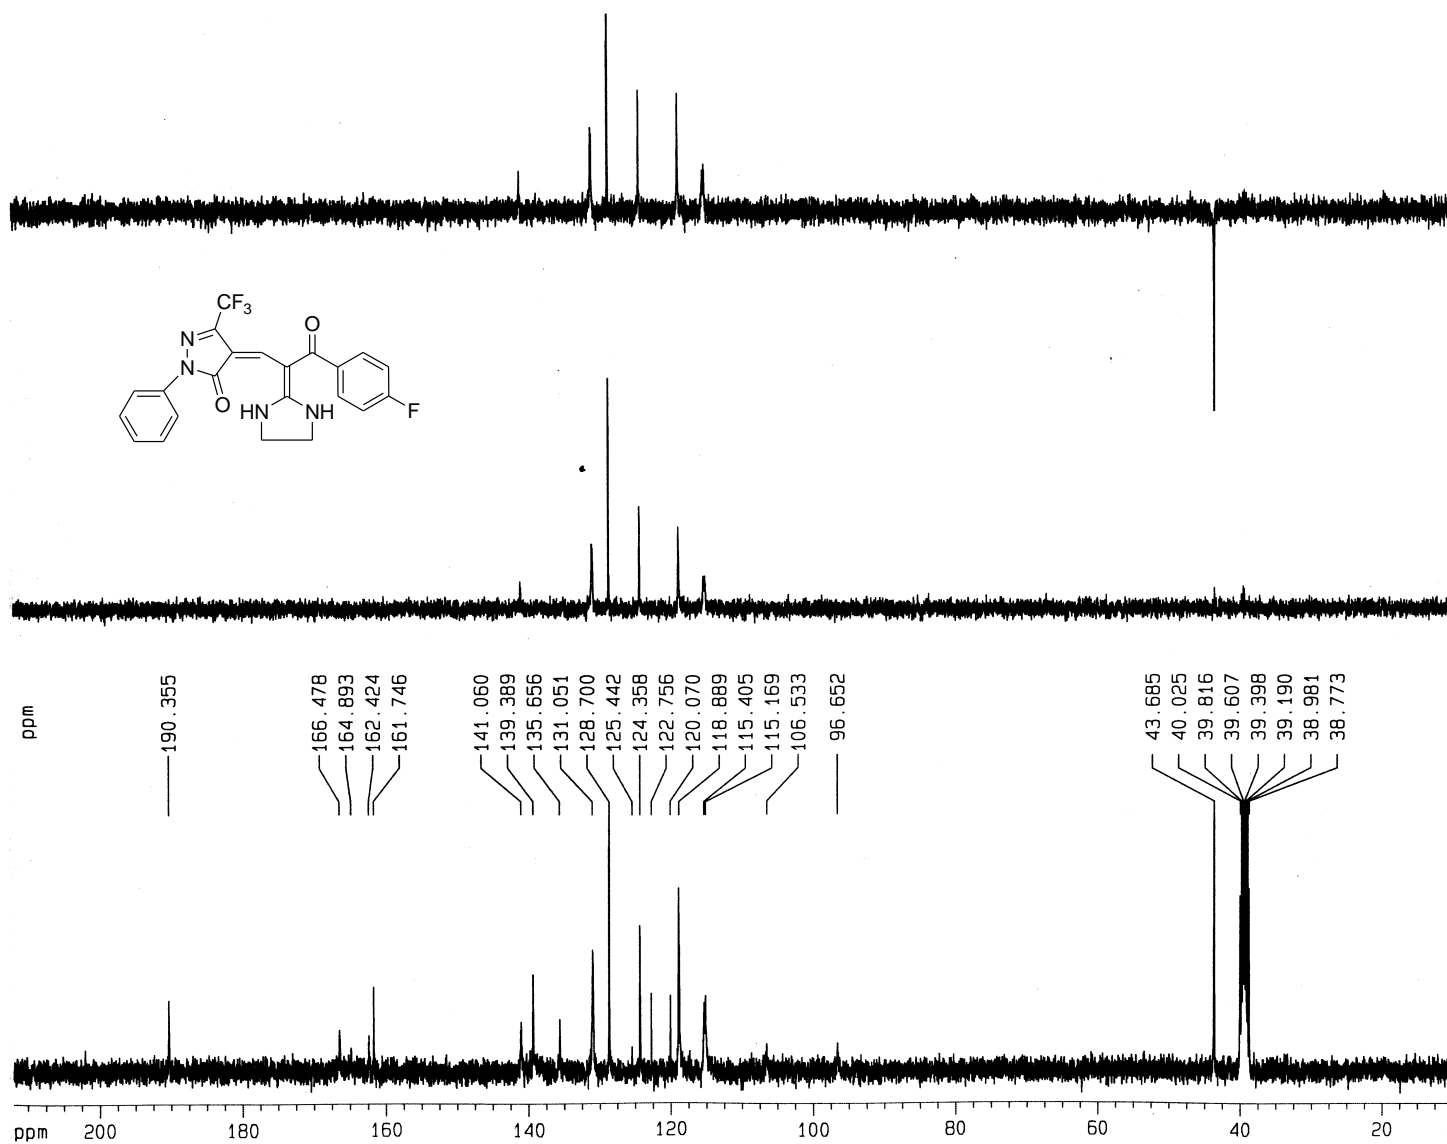

Current Data Parameters  
NAME xc335  
EXPNO 2  
PROCNO 1

F2 - Acquisition Parameters  
Date\_ 20120815  
Time 1.13  
INSTRUM av400  
PROBHD 5 mm GNP 1H/15  
PULPROG zgdc  
TD 32768  
SOLVENT DMSO  
NS 168  
DS 2  
SMH 23148.148 Hz  
FIDRES 0.706425 Hz  
AQ 0.7078604 sec  
RG 90.5  
DM 21.600 usec  
DE 6.00 usec  
TE 291.6 K  
D1 4.5000000 sec  
d11 0.0300000 sec  
MCREST 0.0000000 sec  
MCHWK 0.0150000 sec

----- CHANNEL f1 -----  
NUC1 13C  
P1 9.40 usec  
PL1 -4.00 dB  
SFO1 100.6236958 MHz

----- CHANNEL f2 -----  
CPDPRG2 waltz16  
NUC2 1H  
PCPD2 90.00 usec  
PL2 -3.00 dB  
PL12 14.00 dB  
SFO2 400.1316005 MHz

F2 - Processing parameters  
SI 32768  
SF 100.6128120 MHz  
WDW EM  
SSB 0  
LB 1.00 Hz  
GB 0  
PC 1.20

1D NMR plot parameters  
CX 22.00 cm  
CY 9.00 cm  
F1P 212.000 ppm  
F1 21329.92 Hz  
F2P 9.000 ppm  
F2 905.52 Hz  
PPMCM 9.22727 ppm/cm  
HZCM 928.38177 Hz/cm

Figure 22.  $^{13}\text{C}$  NMR (100 MHz,  $\text{DMSO-}d_6$ ) spectra of compound 6k



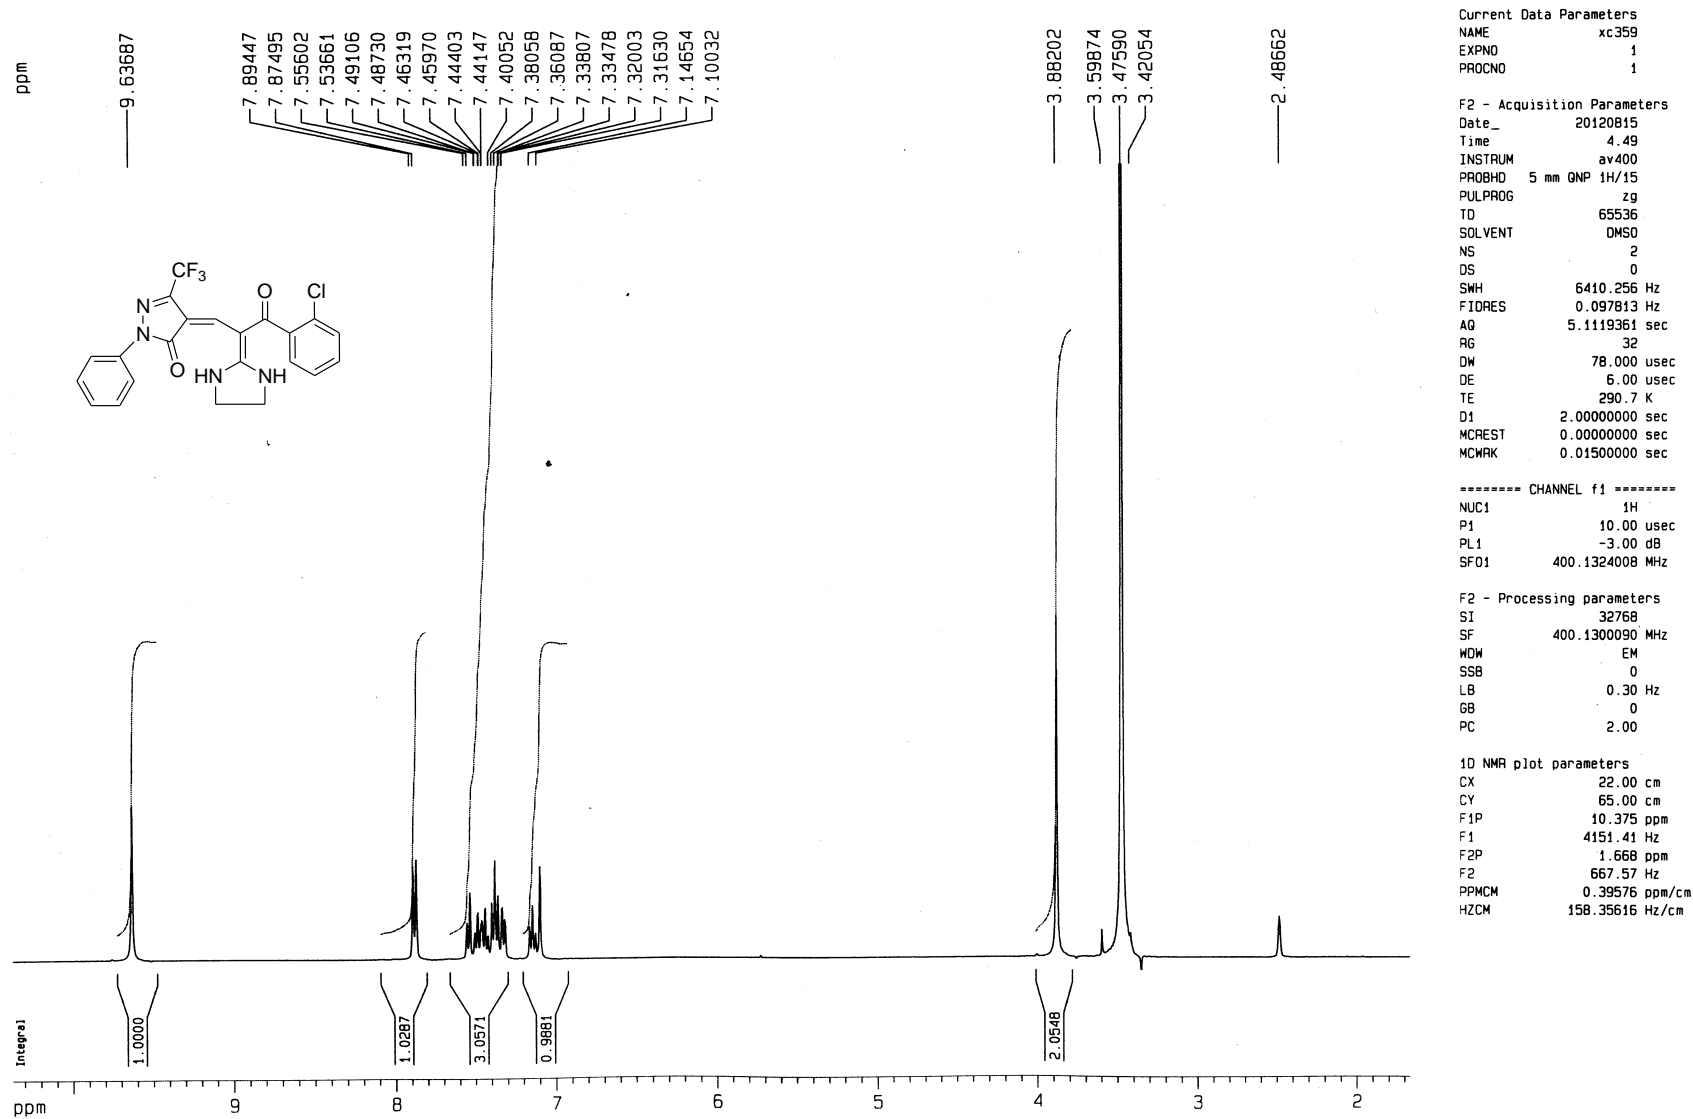

Figure 23.  $^1\text{H}$  NMR (400 MHz,  $\text{DMSO}-d_6$ ) spectra of compound **61**

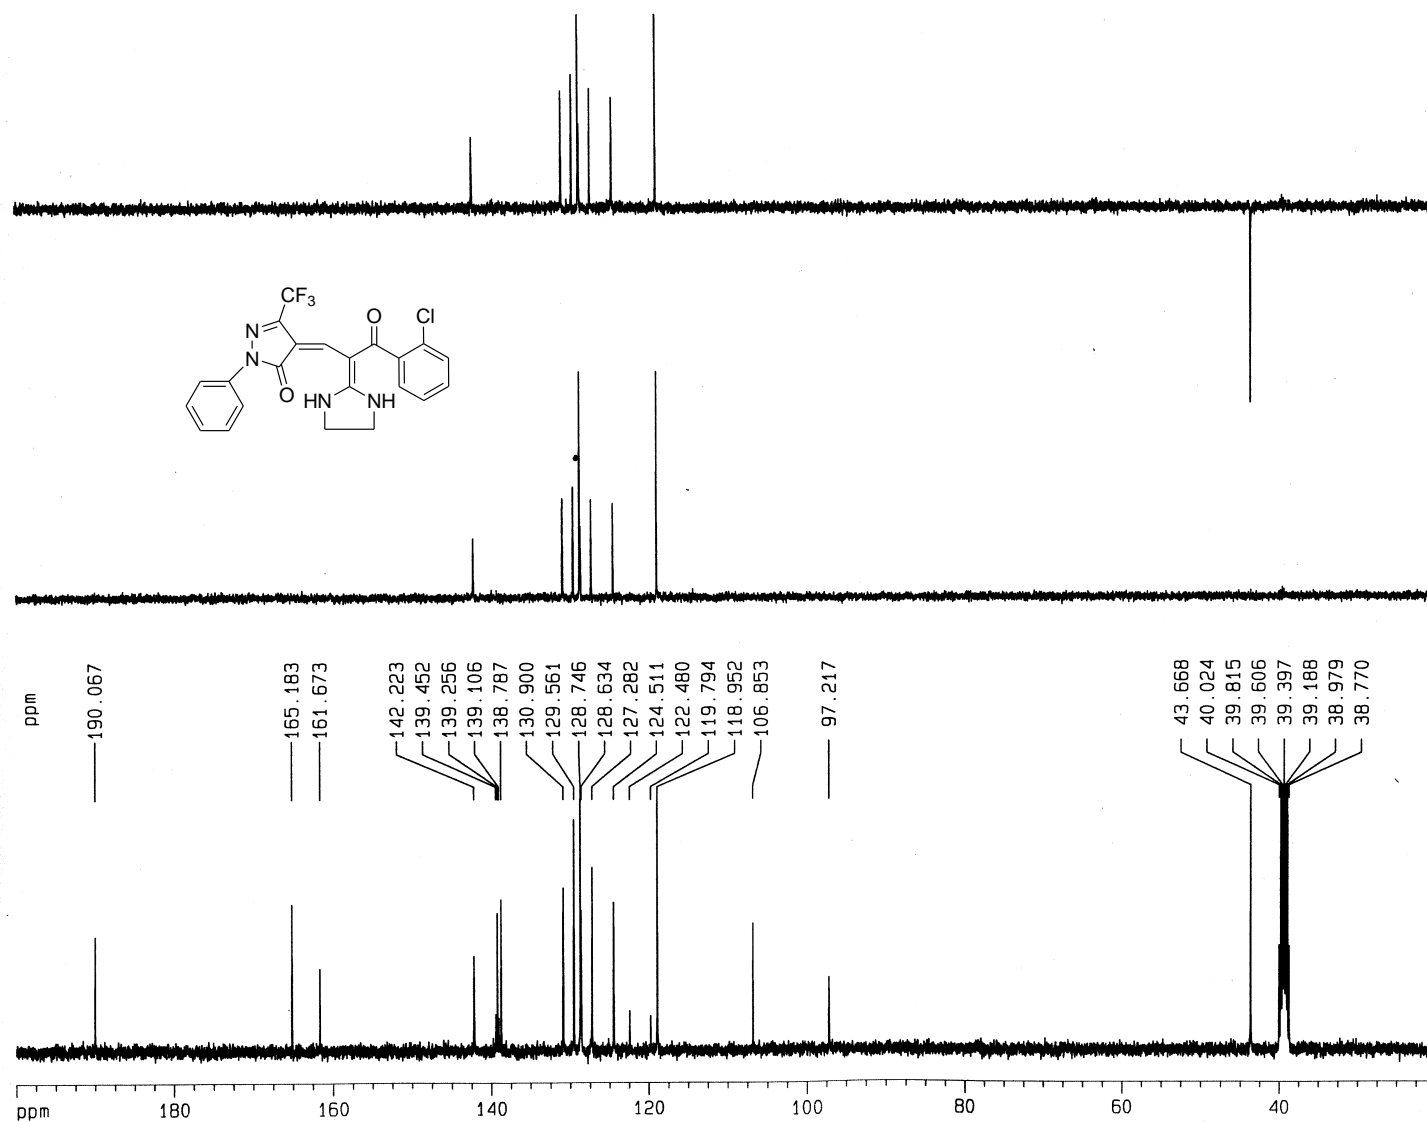

Current Data Parameters  
NAME xc359  
EXPNO 2  
PROCNO 1

F2 - Acquisition Parameters  
Date\_ 20120815  
Time 5.05  
INSTRUM av400  
PROBHD 5 mm GNP 1H/15  
PULPROG zgdc  
TD 32768  
SOLVENT DMSO  
NS 168  
DS 2  
SMH 23148.148 Hz  
FIDRES 0.706425 Hz  
AQ 0.7078604 sec  
RG 128  
DW 21.600 usec  
DE 6.00 usec  
TE 291.6 K  
D1 4.5000000 sec  
d11 0.03000000 sec  
MCREST 0.00000000 sec  
MCWRK 0.01500000 sec

----- CHANNEL f1 -----  
NUC1 13C  
P1 9.40 usec  
PL1 -4.00 dB  
SFO1 100.6236958 MHz

----- CHANNEL f2 -----  
CPDPRG2 waltz16  
NUC2 1H  
PCPD2 90.00 usec  
PL2 -3.00 dB  
PL12 14.00 dB  
SFO2 400.1316005 MHz

F2 - Processing parameters  
SI 32768  
SF 100.6128120 MHz  
WDW EM  
SSB 0  
LB 1.00 Hz  
GB 0  
PC 1.40

1D NMR plot parameters  
CX 22.00 cm  
CY 8.00 cm  
F1P 200.000 ppm  
F1 20122.56 Hz  
F2P 20.000 ppm  
F2 2012.26 Hz  
PPMCM 8.18182 ppm/cm  
HZCM 823.19568 Hz/cm

Figure 24.  $^{13}\text{C}$  NMR (100 MHz,  $\text{DMSO-}d_6$ ) spectra of compound 6l

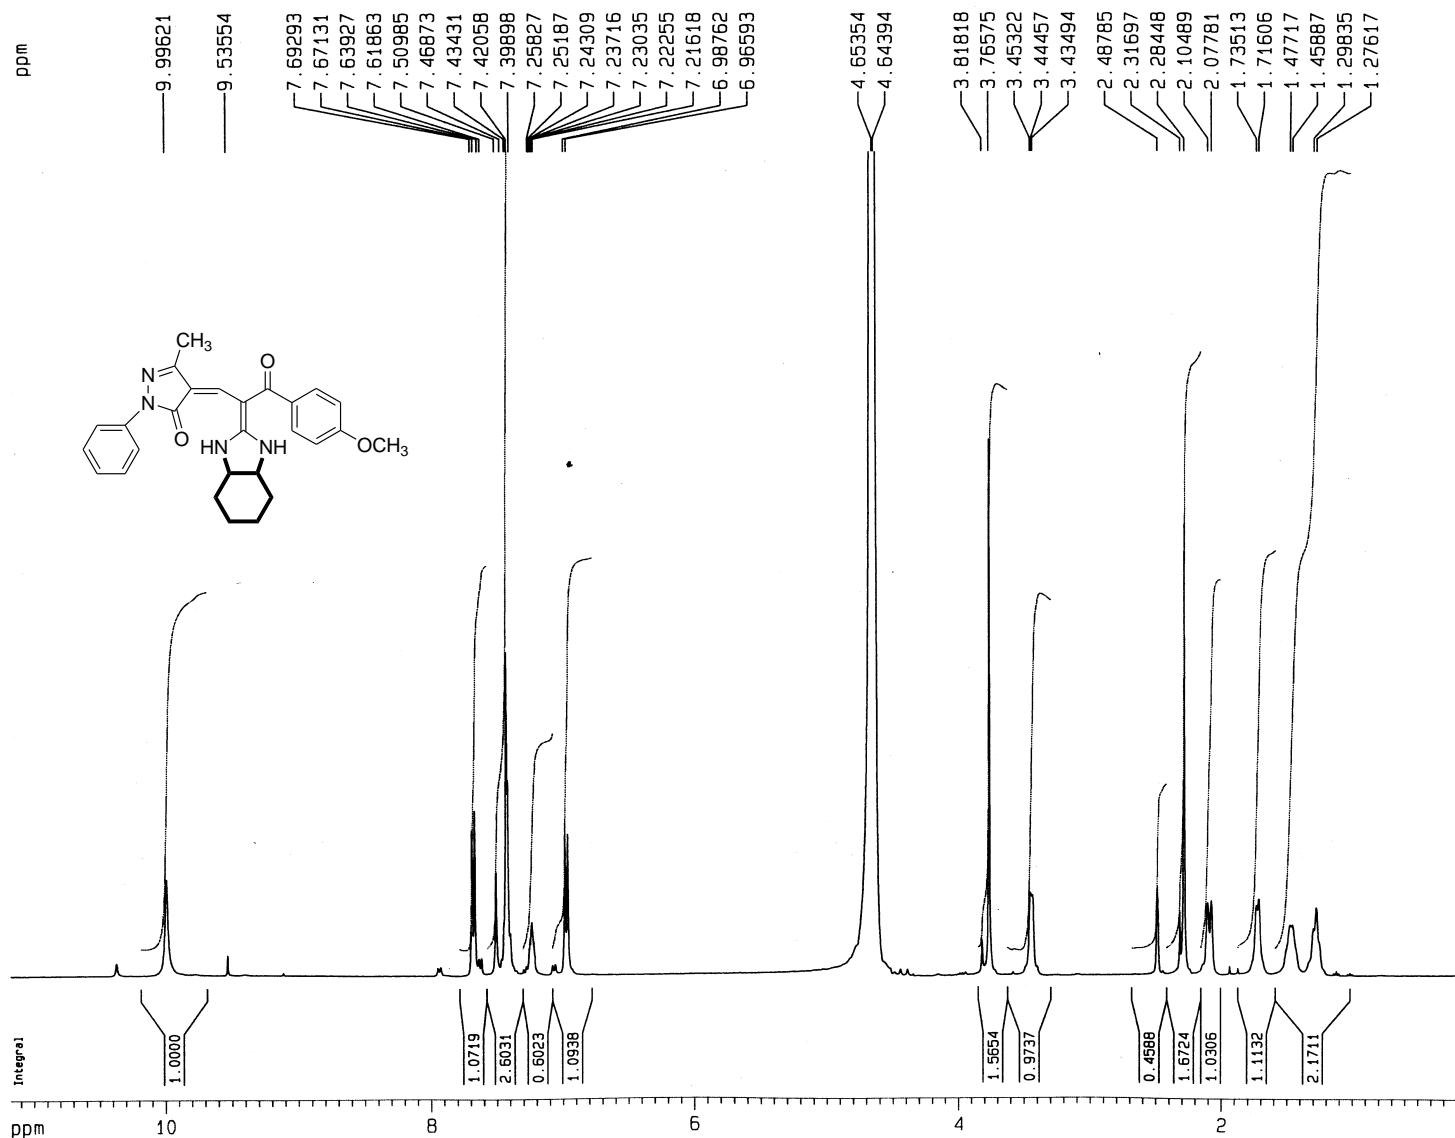

Current Data Parameters  
 NAME xc362  
 EXPNO 1  
 PROCNO 1

F2 - Acquisition Parameters  
 Date\_ 20120815  
 Time 6.28  
 INSTRUM av400  
 PROBHD 5 mm GNP 1H/15  
 PULPROG zg  
 TD 65536  
 SOLVENT DMSO  
 NS 2  
 DS 0  
 SWH 6410.256 Hz  
 FIDRES 0.097813 Hz  
 AQ 5.1119361 sec  
 RG 16  
 DW 78.000 usec  
 DE 6.00 usec  
 TE 291.0 K  
 D1 2.00000000 sec  
 MCREST 0.00000000 sec  
 MCWRK 0.01500000 sec

===== CHANNEL f1 =====  
 NUC1 1H  
 P1 10.00 usec  
 PL1 -3.00 dB  
 SF01 400.1324008 MHz

F2 - Processing parameters  
 SI 32768  
 SF 400.1300090 MHz  
 WDW EM  
 SSB 0  
 LB 0.30 Hz  
 GB 0  
 PC 1.00

1D NMR plot parameters  
 CX 22.00 cm  
 CY 98.00 cm  
 F1P 11.181 ppm  
 F1 4473.66 Hz  
 F2P 0.166 ppm  
 F2 66.61 Hz  
 PPMCM 0.50064 ppm/cm  
 HZCM 200.32053 Hz/cm

Figure 25. <sup>1</sup>H NMR (400 MHz, DMSO-*d*<sub>6</sub>) spectra of compound 6m

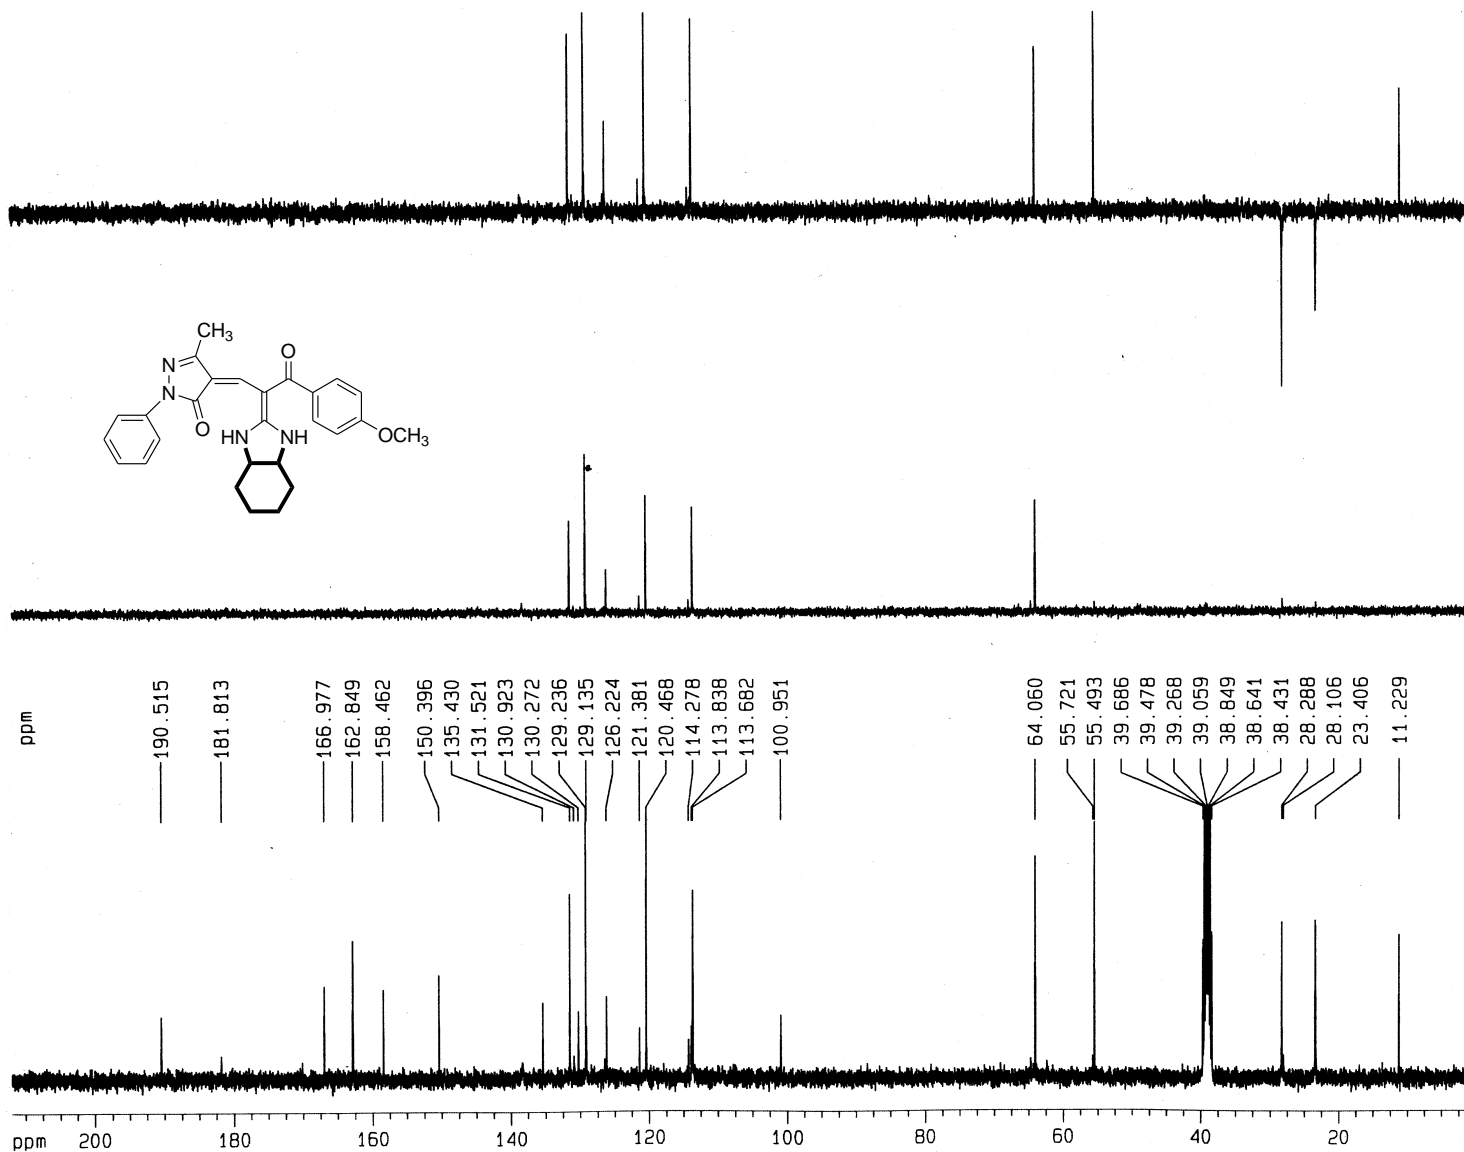

Current Data Parameters  
NAME xc362  
EXPNO 2  
PROCNO 1

F2 - Acquisition Parameters  
Date\_ 20120815  
Time 6.44  
INSTRUM av400  
PROBHD 5 mm QNP 1H/15  
PULPROG zgdc  
TD 32768  
SOLVENT DMSO  
NS 168  
DS 2  
SWH 23148.148 Hz  
FIDRES 0.706425 Hz  
AQ 0.7078604 sec  
RG 128  
DW 21.600 usec  
DE 6.00 usec  
TE 291.7 K  
D1 4.5000000 sec  
d11 0.03000000 sec  
MCREST 0.00000000 sec  
MCWRK 0.01500000 sec

----- CHANNEL f1 -----  
NUC1 13C  
P1 9.40 usec  
PL1 -4.00 dB  
SF01 100.6236958 MHz

----- CHANNEL f2 -----  
CPDPRG2 waltz16  
NUC2 1H  
PCPD2 90.00 usec  
PL2 -3.00 dB  
PL12 14.00 dB  
SF02 400.1316005 MHz

F2 - Processing parameters  
SI 32768  
SF 100.6128120 MHz  
WDW EM  
SSB 0  
LB 1.00 Hz  
GB 0  
PC 1.40

1D NMR plot parameters  
CX 22.00 cm  
CY 6.00 cm  
F1P 212.000 ppm  
F1 21329.92 Hz  
F2P 0.000 ppm  
F2 0.00 Hz  
PPMCM 9.63636 ppm/cm  
HZCM 969.54156 Hz/cm

Figure 26. <sup>13</sup>C NMR (100 MHz, DMSO-*d*<sub>6</sub>) spectra of compound 6m

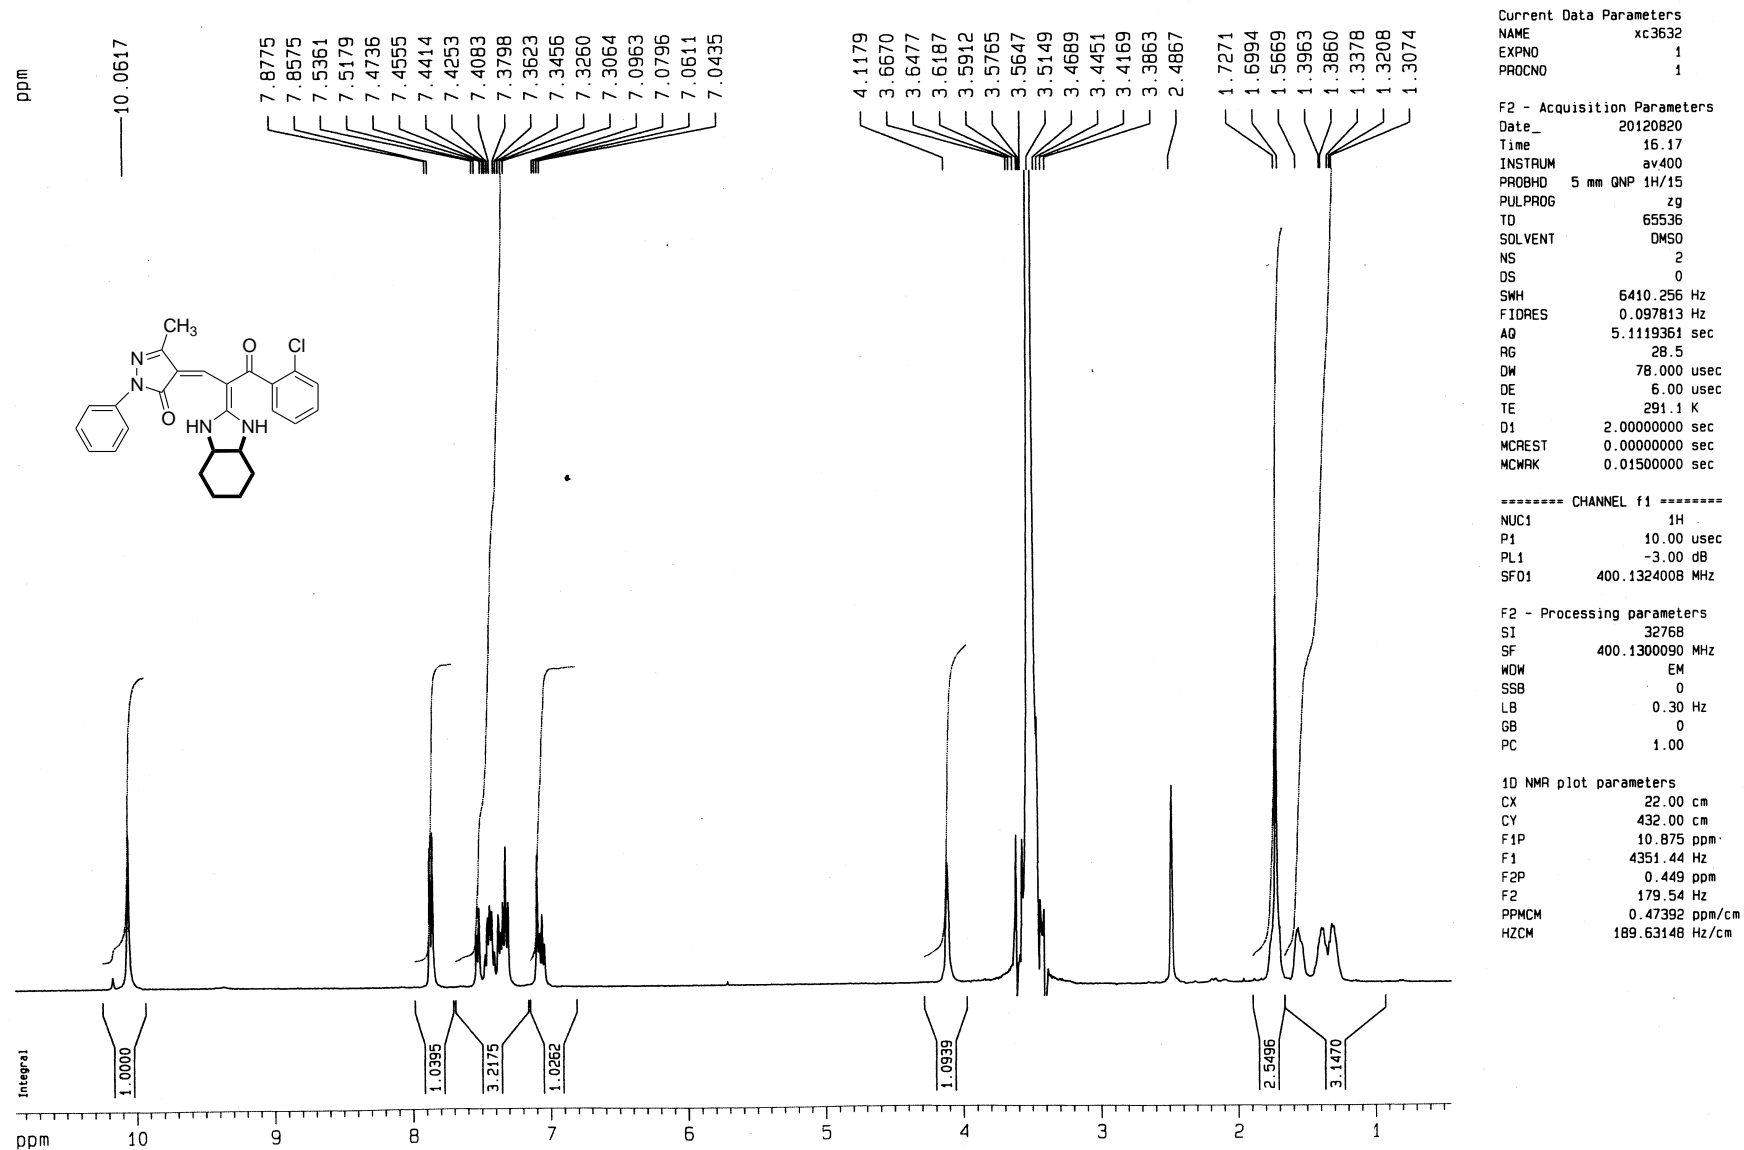

Figure 27. <sup>1</sup>H NMR (400 MHz, DMSO-*d*<sub>6</sub>) spectra of compound 6n

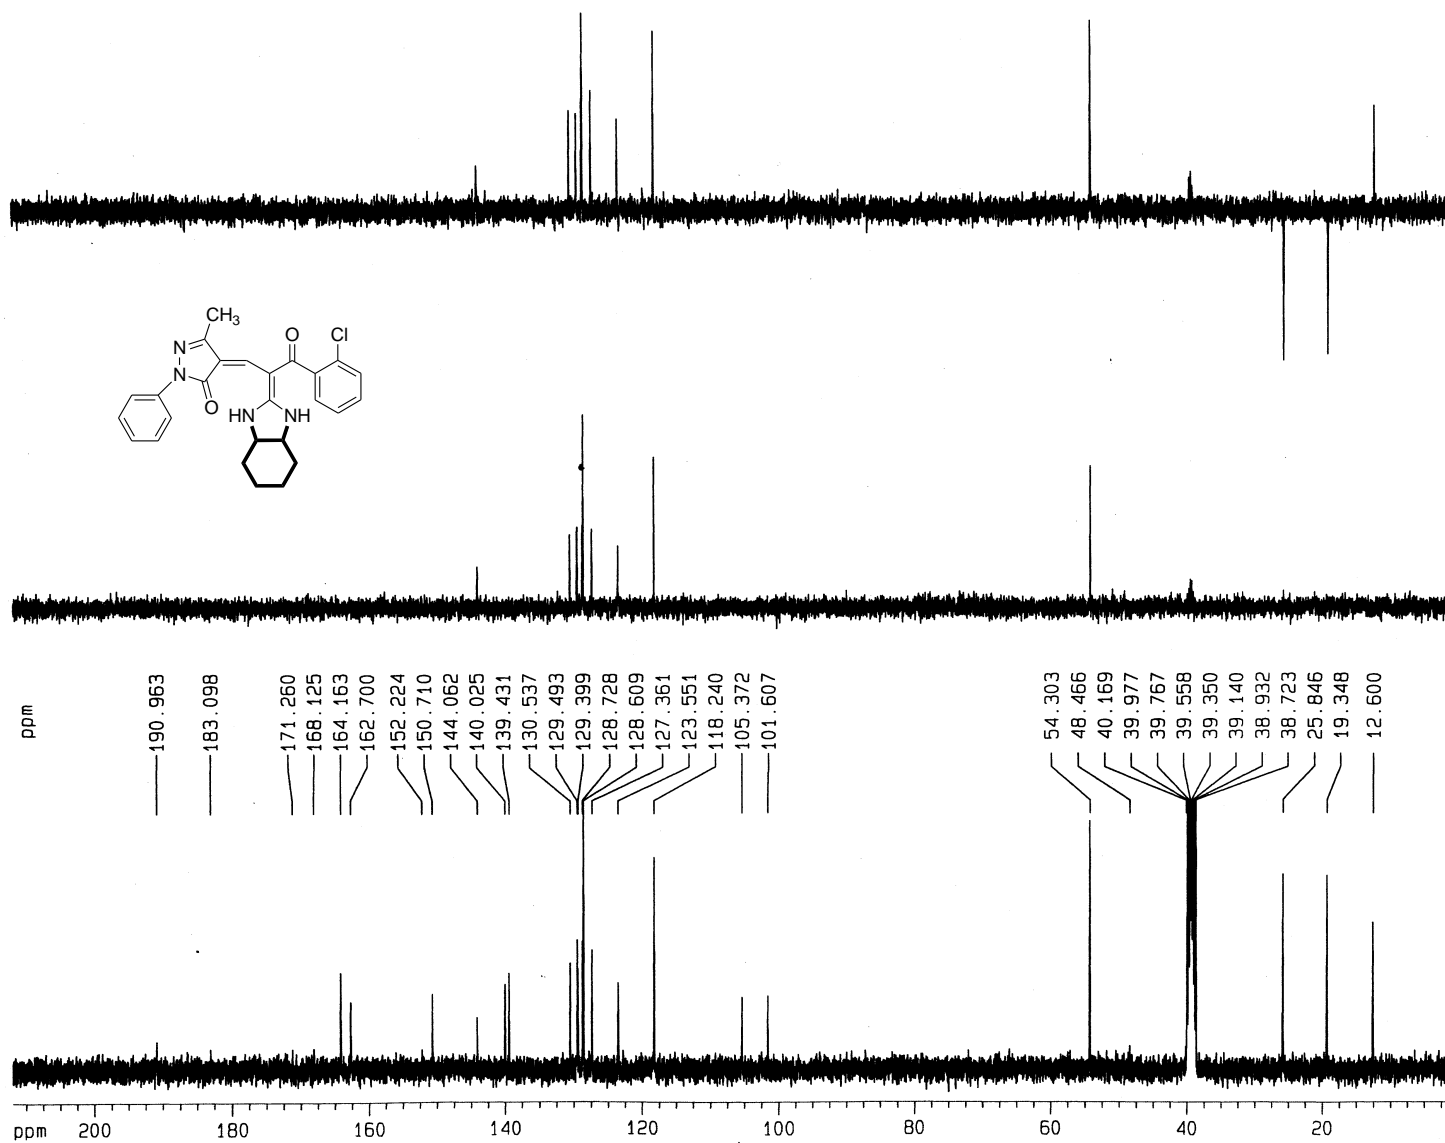

Current Data Parameters  
NAME xc3632  
EXPNO 3  
PROCNO 1

F2 - Acquisition Parameters  
Date\_ 20120821  
Time 19.42  
INSTRUM av400  
PROBHD 5 mm GNP 1H/15  
PULPROG zgdc  
TD 32768  
SOLVENT DMSO  
NS 276  
DS 2  
SMH 23148.148 Hz  
FIDRES 0.706425 Hz  
AQ 0.7078604 sec  
RG 143.7  
DM 21.600 usec  
DE 6.00 usec  
TE 291.9 K  
D1 4.5000000 sec  
d11 0.0300000 sec  
MCREST 0.0000000 sec  
MCWRK 0.0150000 sec

----- CHANNEL f1 -----  
NUC1 13C  
P1 9.40 usec  
PL1 -4.00 dB  
SF01 100.6236958 MHz

----- CHANNEL f2 -----  
CPDPRG2 waltz16  
NUC2 1H  
PCPD2 90.00 usec  
PL2 -3.00 dB  
PL12 14.00 dB  
SF02 400.1316005 MHz

F2 - Processing parameters  
SI 32768  
SF 100.6128120 MHz  
WDW EM  
SSB 0  
LB 1.00 Hz  
GB 0  
PC 0.95

1D NMR plot parameters  
CX 22.00 cm  
CY 5.00 cm  
F1P 212.000 ppm  
F1 21329.92 Hz  
F2P 0.000 ppm  
F2 0.00 Hz  
PPMCM 9.63636 ppm/cm  
HZCM 969.54156 Hz/cm

Figure 28.  $^{13}\text{C}$  NMR (100 MHz,  $\text{DMSO-}d_6$ ) spectra of compound 6n

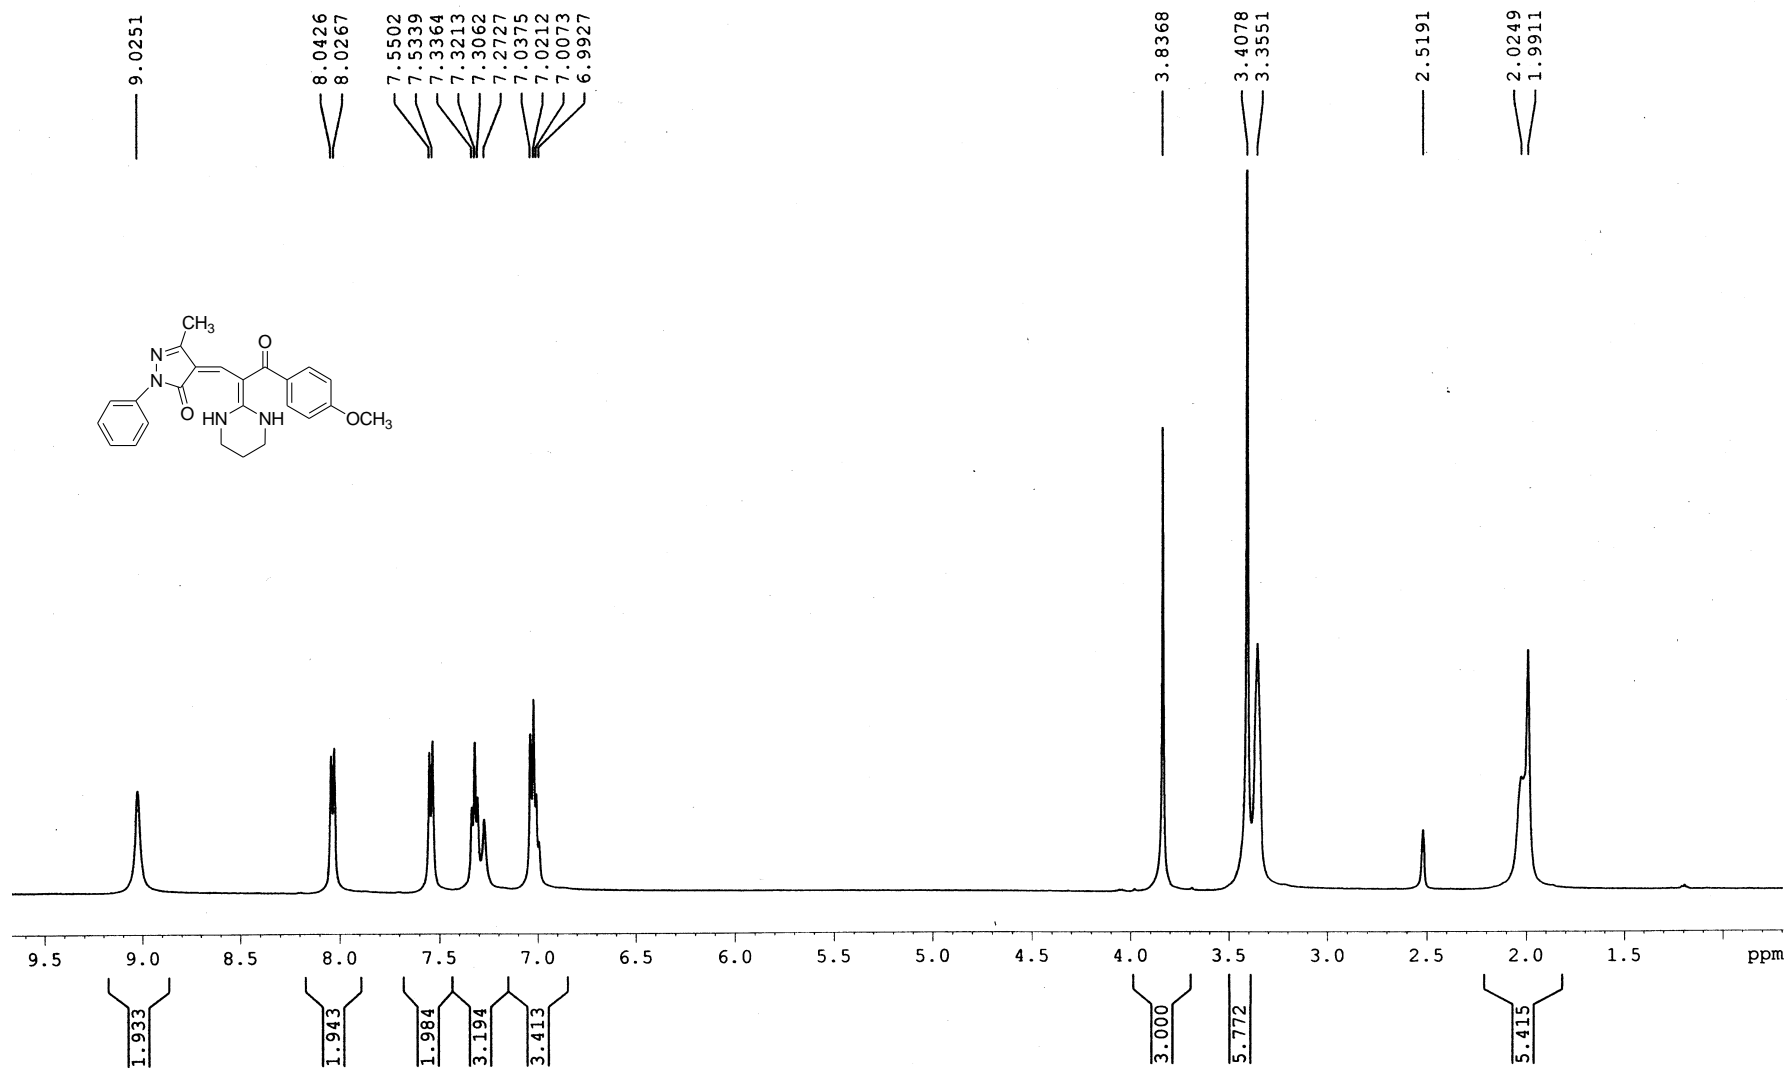

Figure 29.  $^1\text{H}$  NMR (500 MHz,  $\text{DMSO-}d_6$ ) spectra of compound 7a

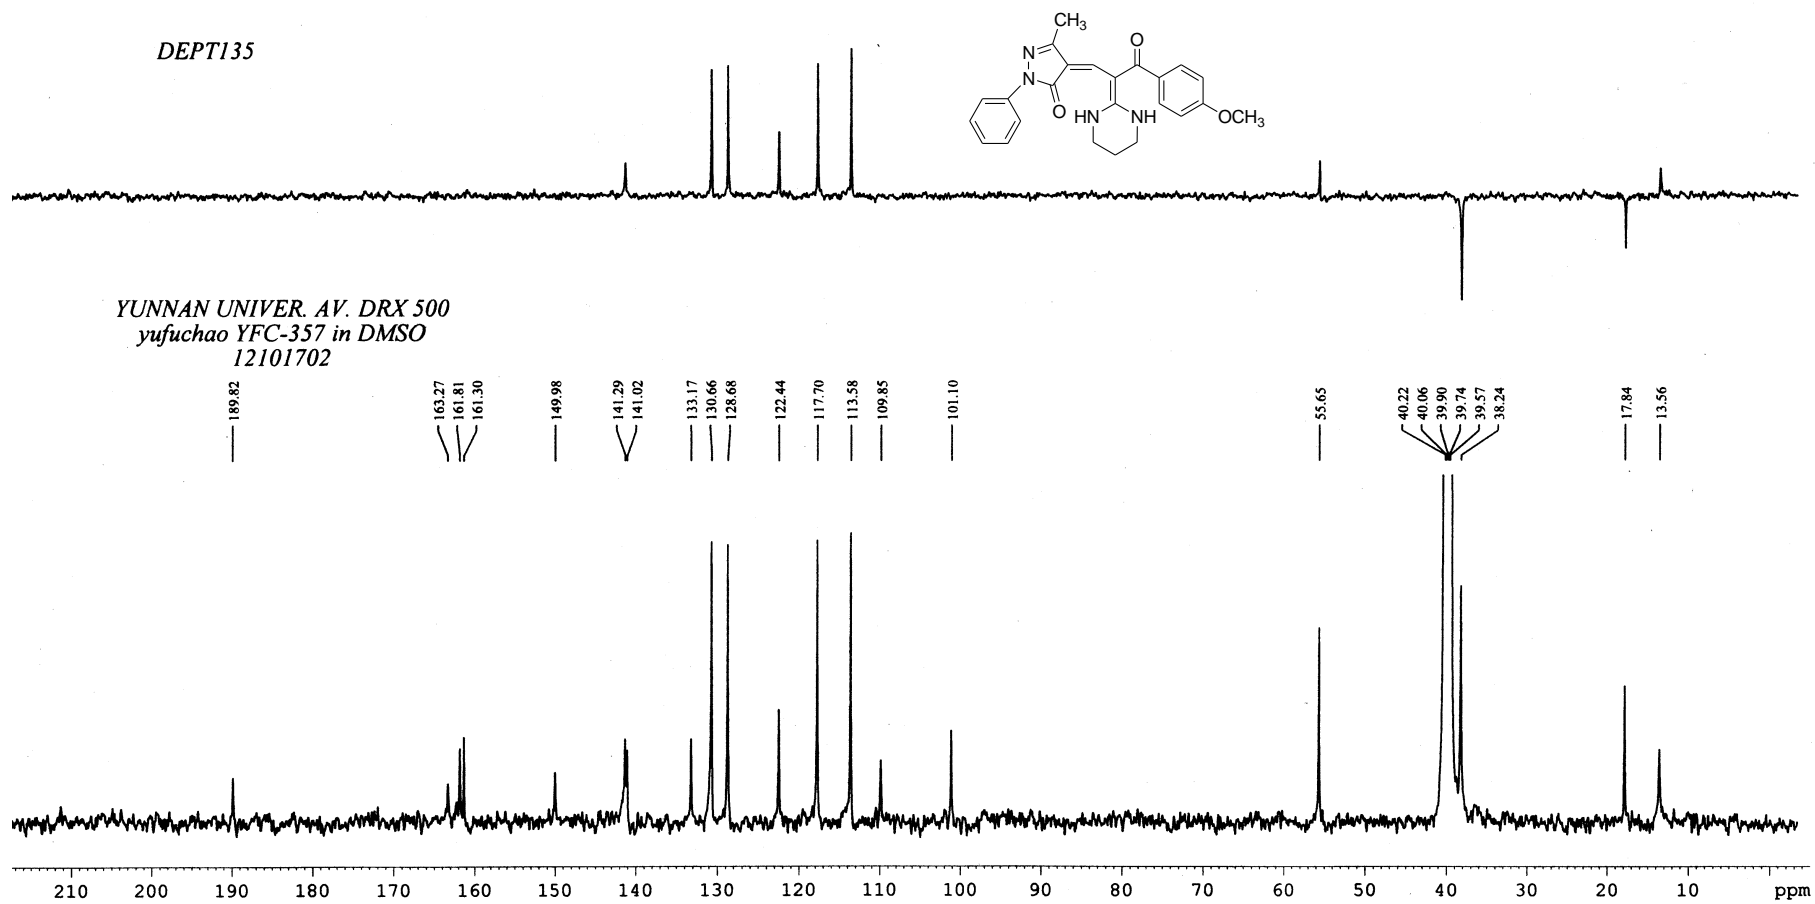

Figure 30.  $^{13}\text{C}$  NMR (125 MHz,  $\text{DMSO-}d_6$ ) spectra of compound 7a



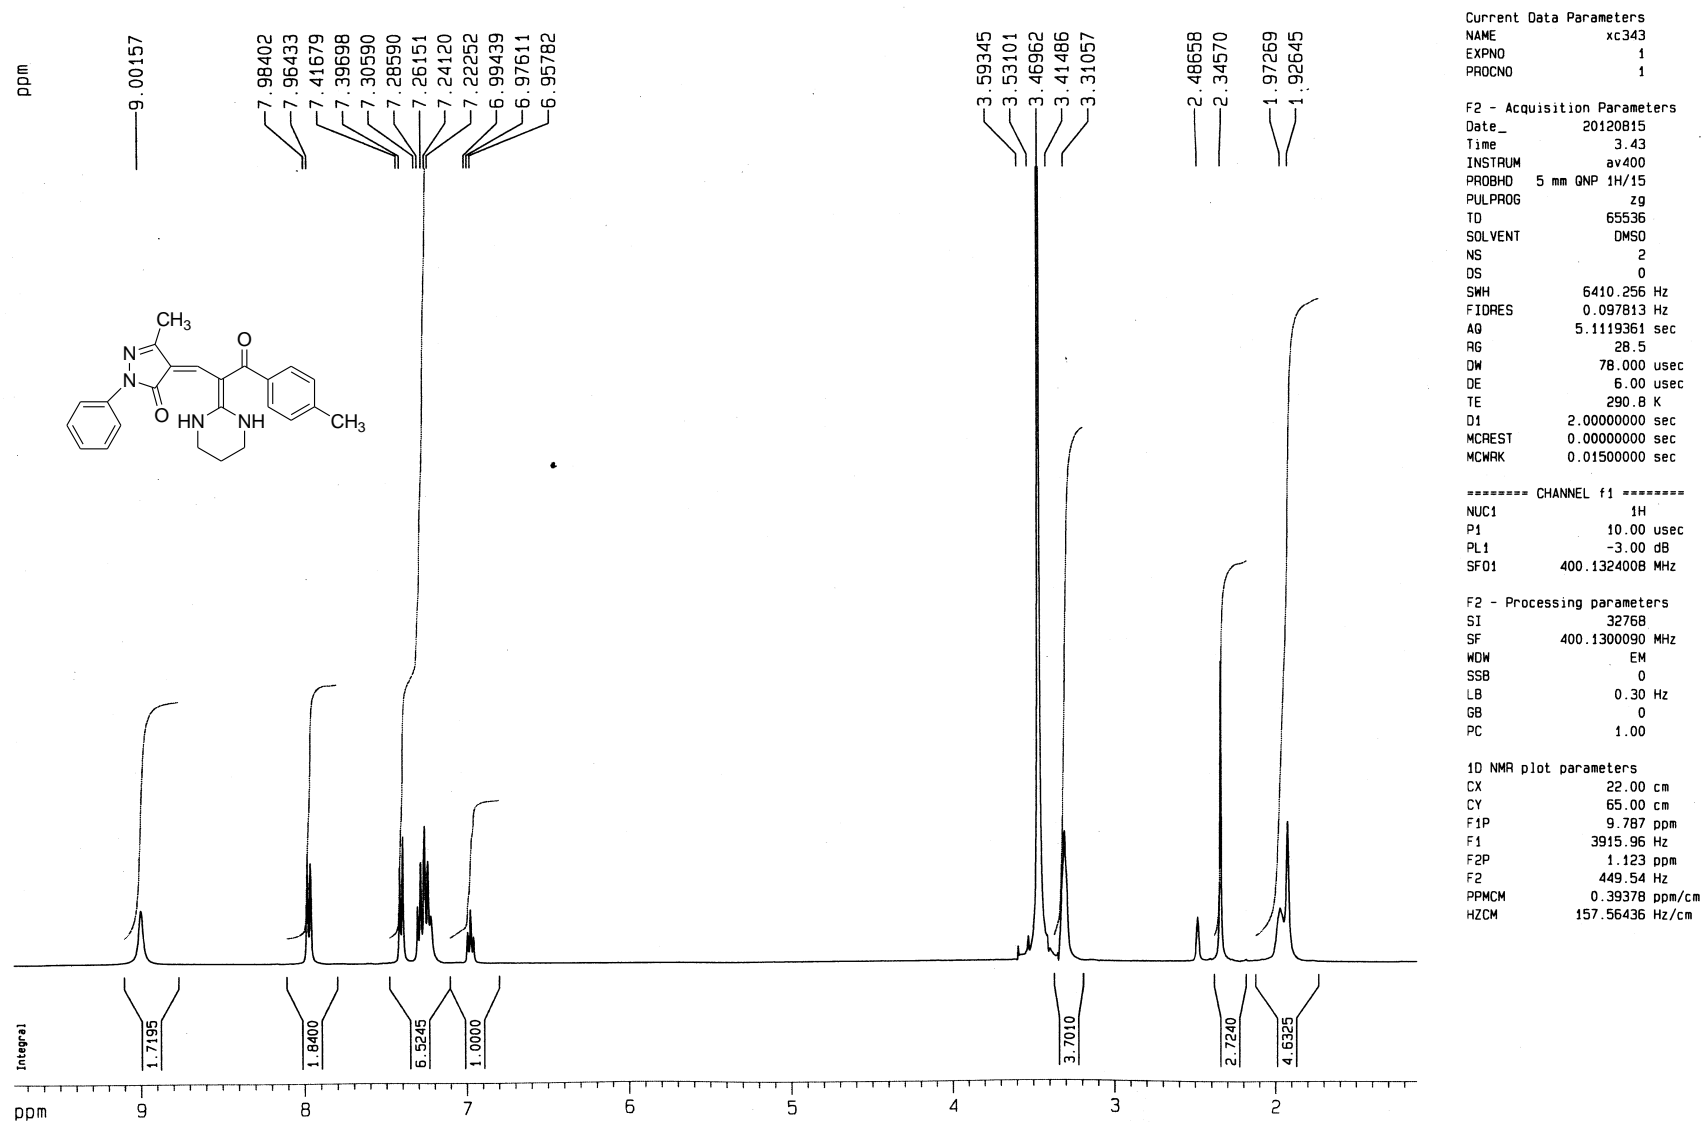

Figure 31. <sup>1</sup>H NMR (400 MHz, DMSO-*d*<sub>6</sub>) spectra of compound 7b

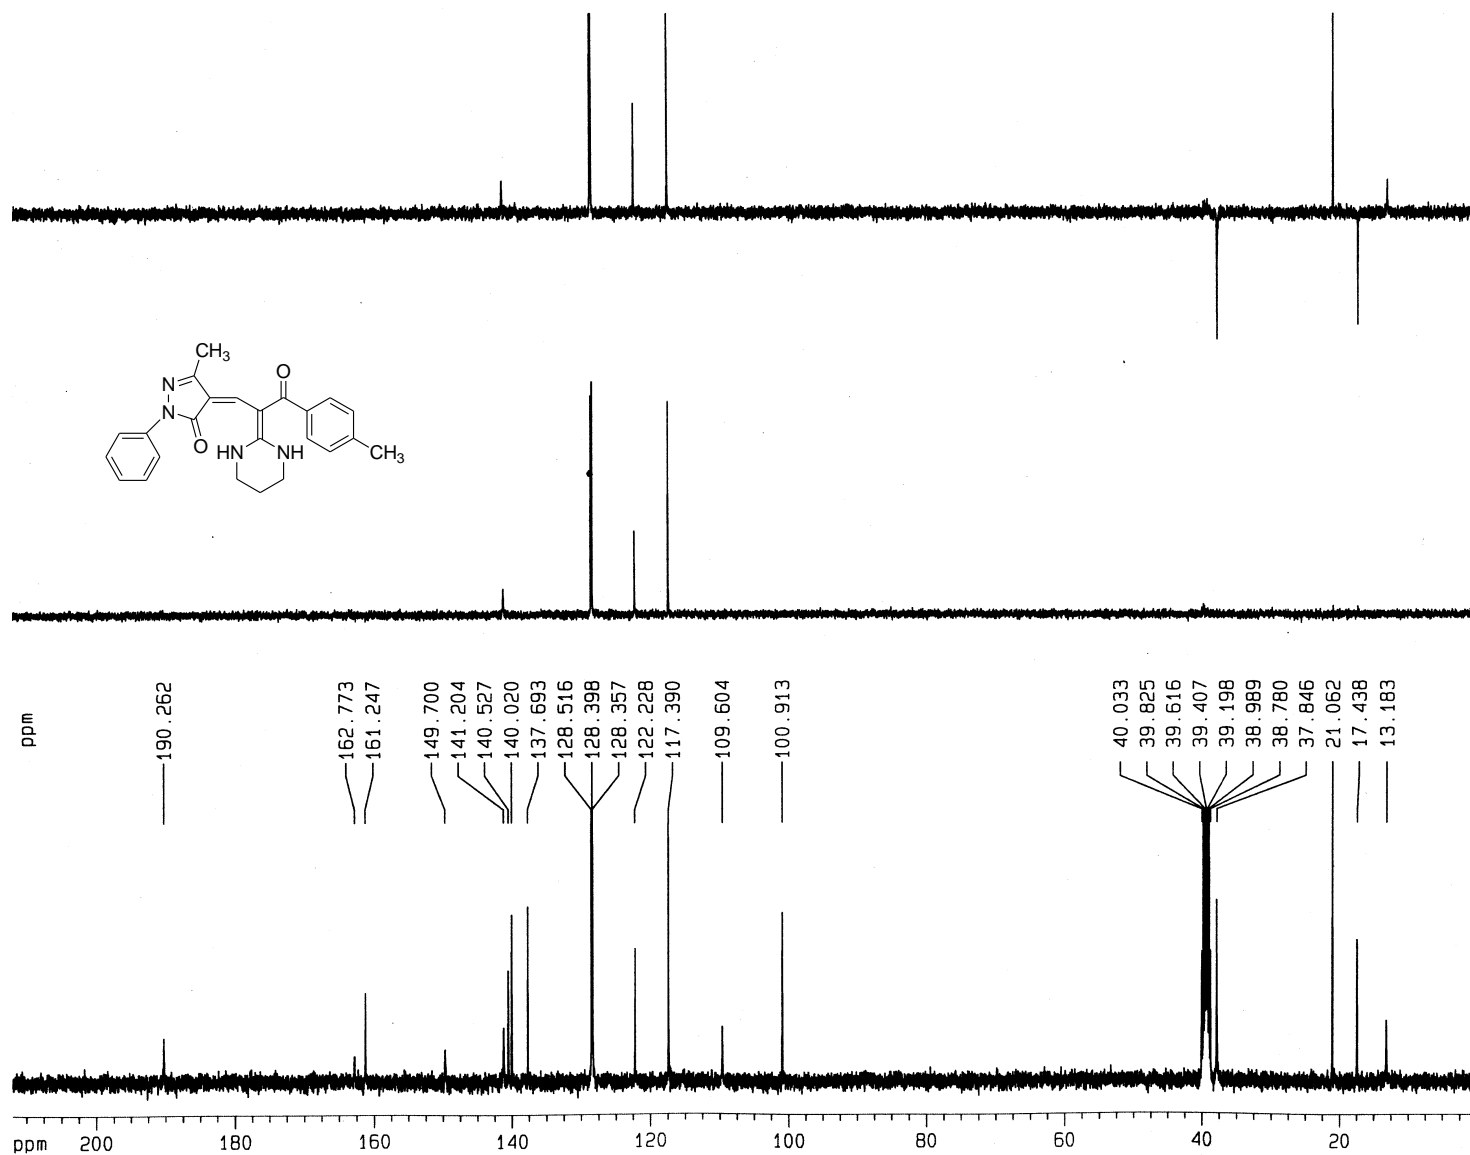

Figure 32.  $^{13}\text{C}$  NMR (100 MHz,  $\text{DMSO}-d_6$ ) spectra of compound 7b

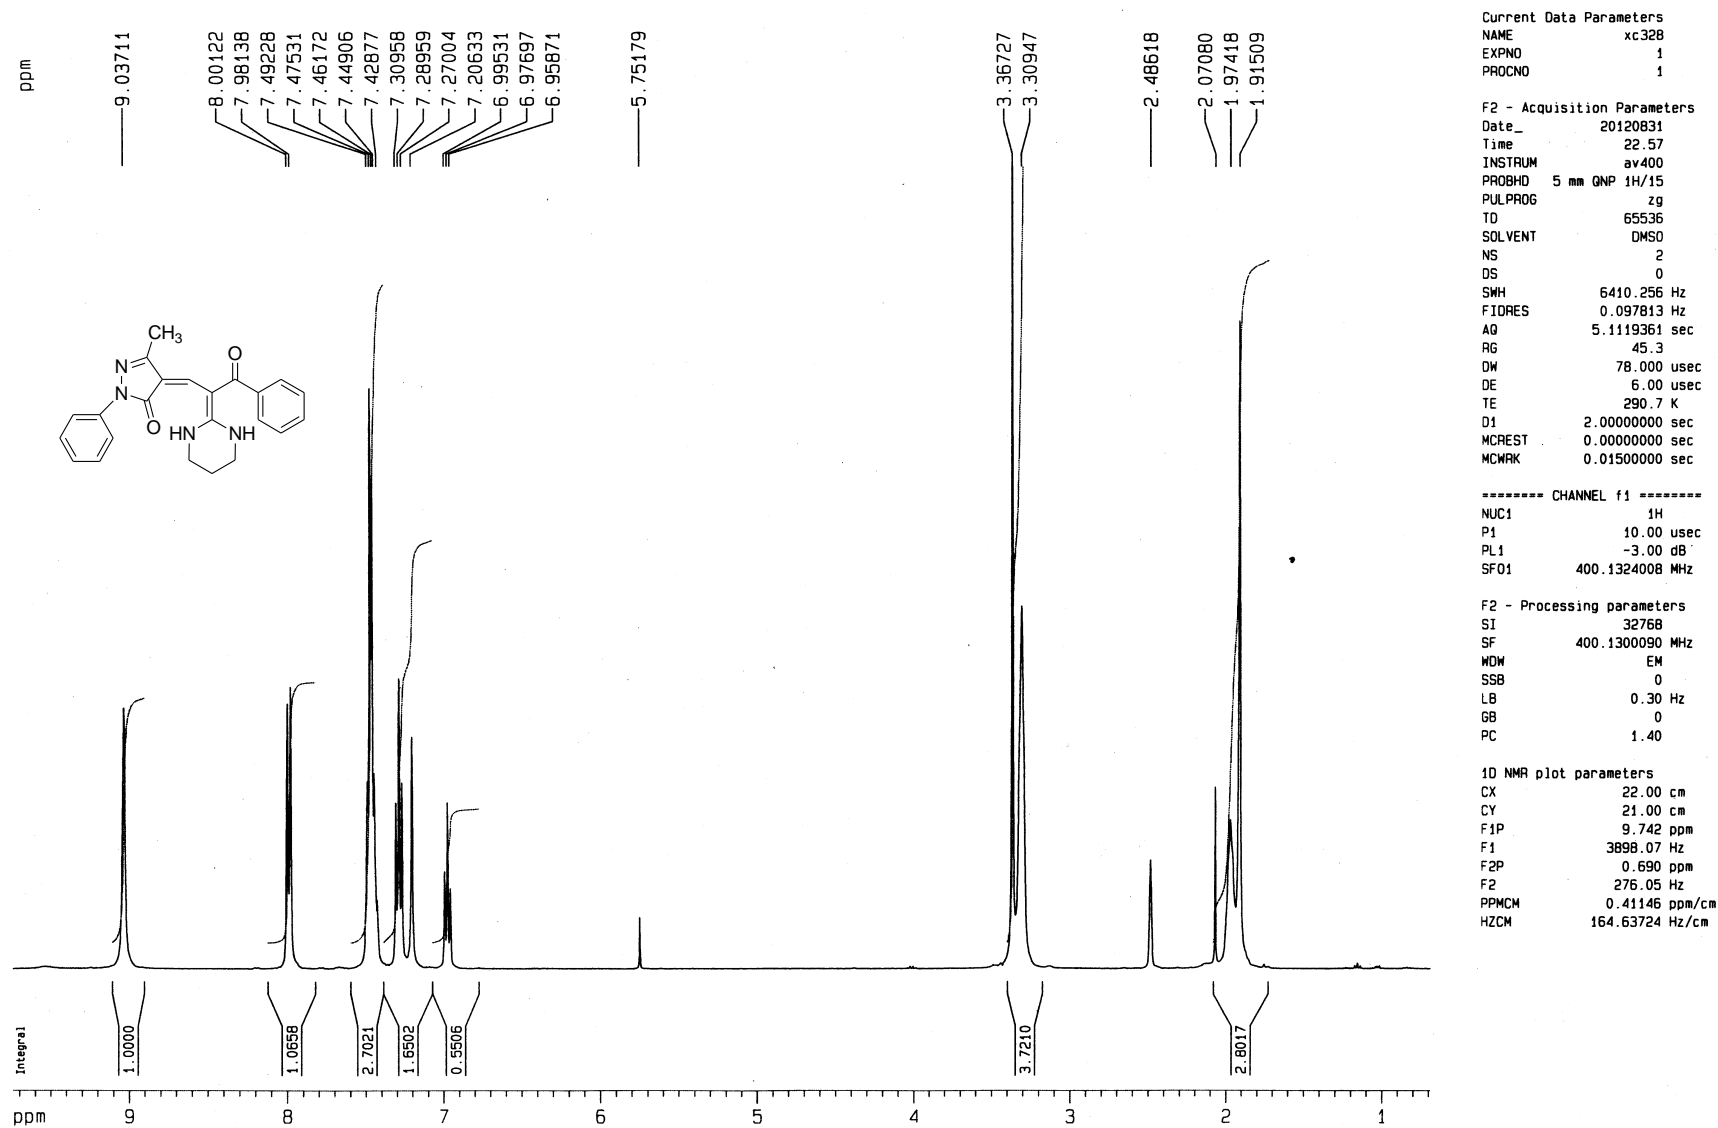

Figure 33.  $^1\text{H}$  NMR (400 MHz,  $\text{DMSO}-d_6$ ) spectra of compound **7c**

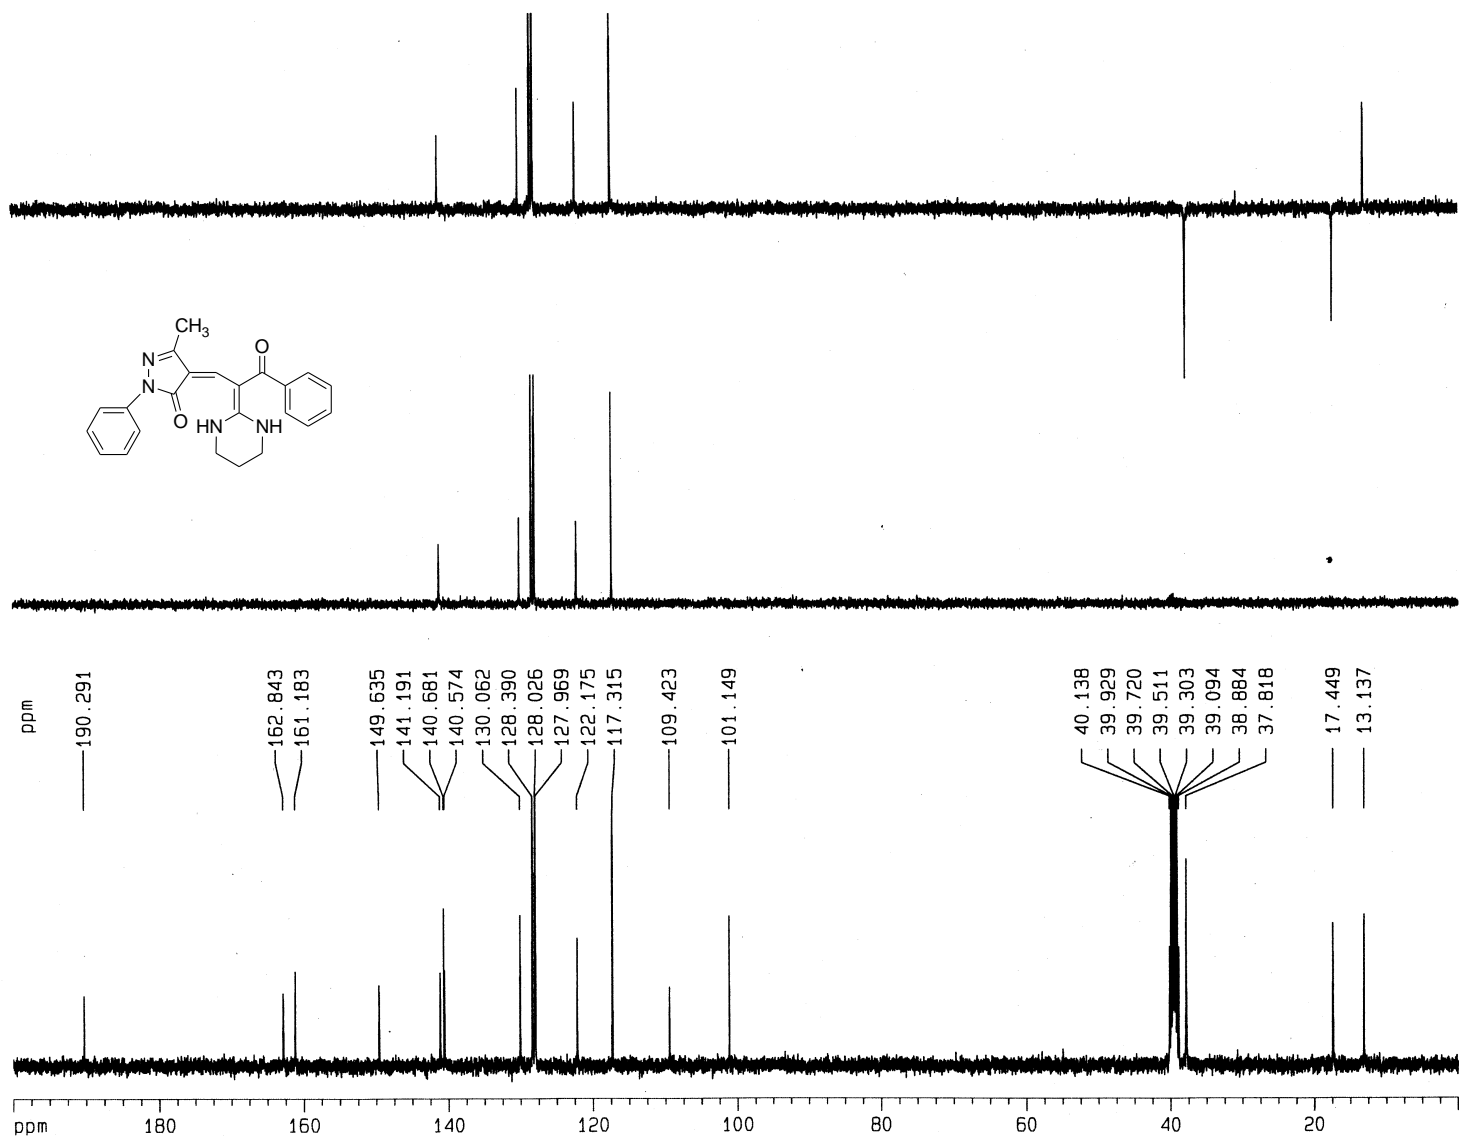

Current Data Parameters  
NAME xc328  
EXPNO 2  
PROCNO 1

F2 - Acquisition Parameters  
Date\_ 20120831  
Time 23.12  
INSTRUM av400  
PROBHD 5 mm QNP 1H/15  
PULPROG zgdc  
TD 32768  
SOLVENT DMSO  
NS 165  
DS 2  
SWH 23148.148 Hz  
FIDRES 0.706425 Hz  
AQ 0.7078604 sec  
RG 57  
DM 21.600 usec  
DE 6.00 usec  
TE 291.3 K  
D1 4.5000000 sec  
d11 0.0300000 sec  
MCREST 0.0000000 sec  
MCMRK 0.0150000 sec

----- CHANNEL f1 -----  
NUC1 13C  
P1 9.40 usec  
PL1 -4.00 dB  
SF01 100.6236958 MHz

----- CHANNEL f2 -----  
CPDPRG2 waltz16  
NUC2 1H  
PCPD2 90.00 usec  
PL2 -3.00 dB  
PL12 14.00 dB  
SF02 400.1316005 MHz

F2 - Processing parameters  
SI 32768  
SF 100.6128120 MHz  
WDW EM  
SSB 0  
LB 1.00 Hz  
GB 0  
PC 1.40

1D NMR plot parameters  
CX 22.00 cm  
CY 7.00 cm  
F1P 200.000 ppm  
F1 20122.56 Hz  
F2P -0.000 ppm  
F2 -0.00 Hz  
PPMCH 9.09091 ppm/cm  
HZCM 914.66193 Hz/cm

Figure 34.  $^{13}\text{C}$  NMR (100 MHz,  $\text{DMSO}-d_6$ ) spectra of compound 7c

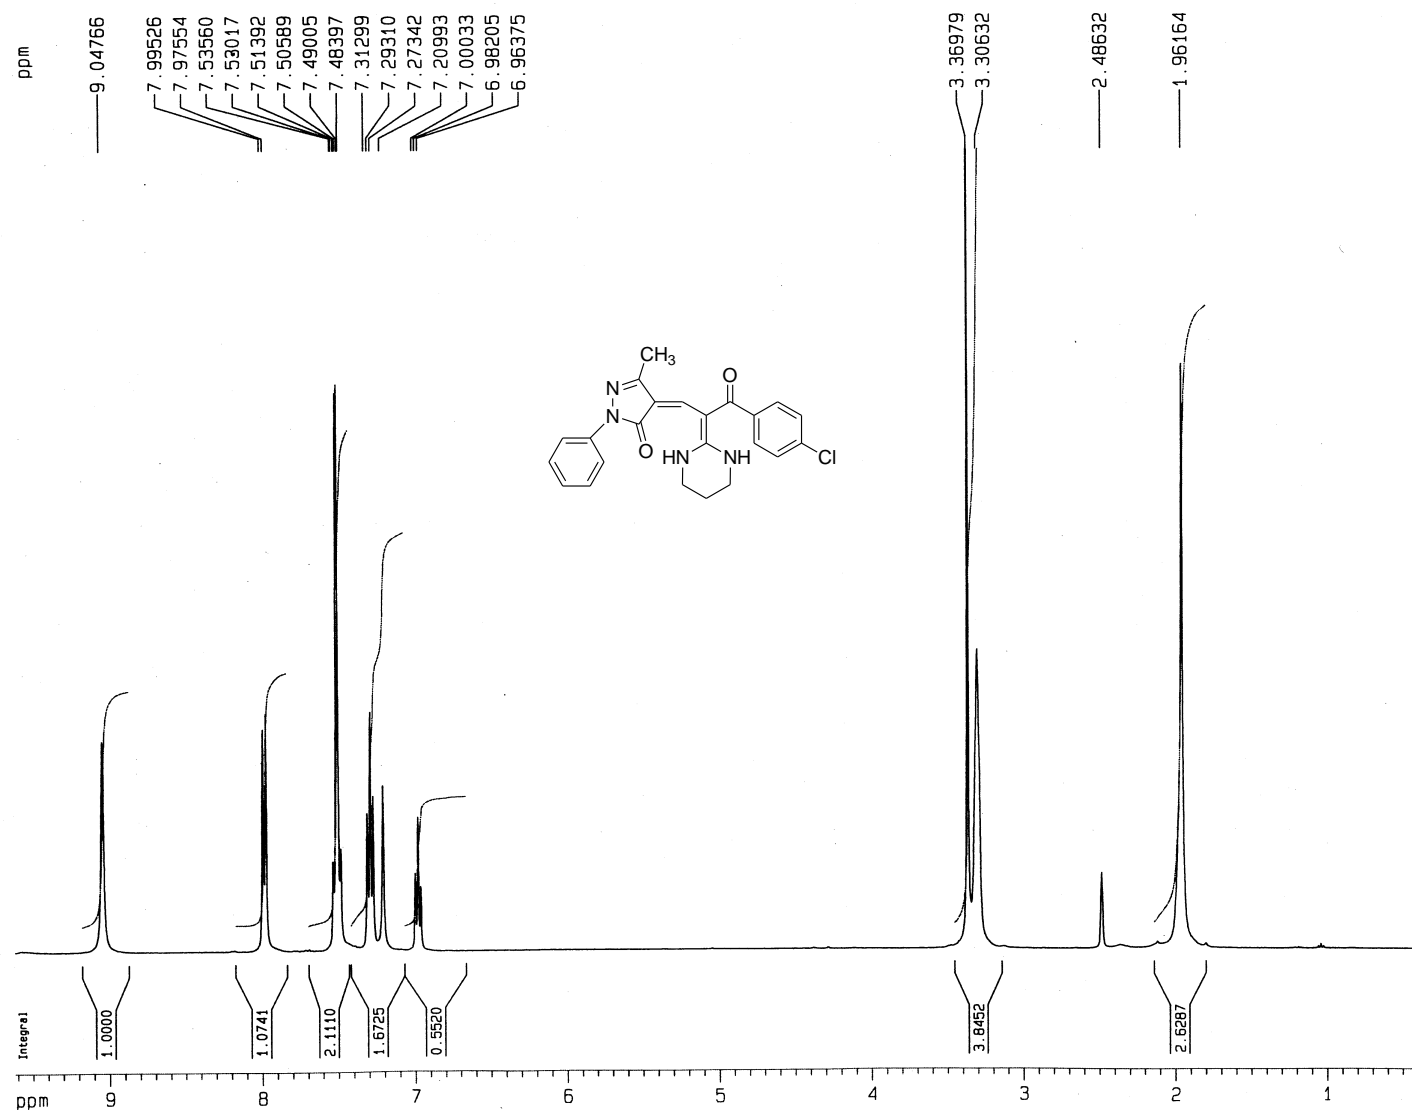

Current Data Parameters  
NAME xc3251  
EXPNO 1  
PROCNO 1

F2 - Acquisition Parameters  
Date\_ 20120831  
Time 22.23  
INSTRUM av400  
PROBHD 5 mm GNP 1H/15  
PULPROG zg  
TD 65536  
SOLVENT DMSO  
NS 2  
DS 0  
SWH 6410.256 Hz  
FIDRES 0.097813 Hz  
AQ 5.1119361 sec  
RG 45.3  
DW 78.000 usec  
DE 6.00 usec  
TE 291.1 K  
D1 2.00000000 sec  
MCREST 0.00000000 sec  
MCWRK 0.01500000 sec

\*\*\*\*\* CHANNEL f1 \*\*\*\*\*  
NUC1 1H  
P1 10.00 usec  
PL1 -3.00 dB  
SFO1 400.1324008 MHz

F2 - Processing parameters  
SI 32768  
SF 400.1300090 MHz  
WDW EM  
SSB 0  
LB 0.30 Hz  
GB 0  
PC 1.00

1D NMR plot parameters  
CX 22.00 cm  
CY 16.00 cm  
F1P 9.619 ppm  
F1 3848.69 Hz  
F2P 0.320 ppm  
F2 128.05 Hz  
PPMCM 0.42266 ppm/cm  
HZCM 169.11993 Hz/cm

Figure 35. <sup>1</sup>H NMR (400 MHz, DMSO-*d*<sub>6</sub>) spectra of compound 7d

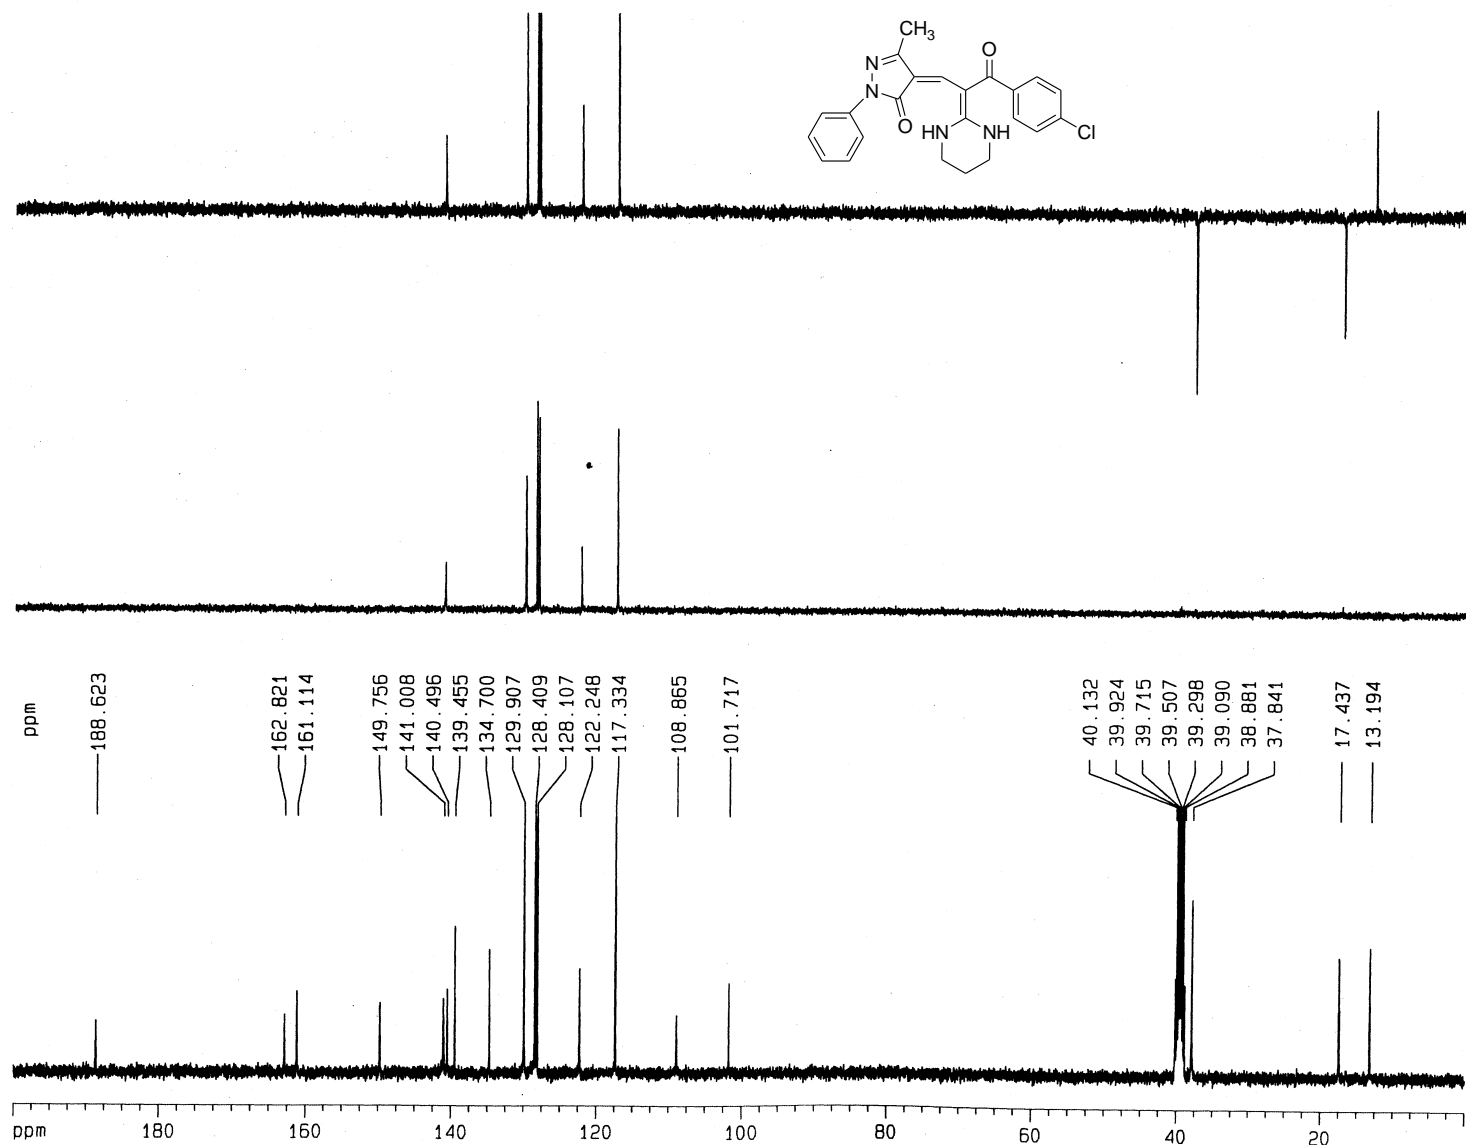

Current Data Parameters  
NAME xc3251  
EXPNO 2  
PROCNO 1

F2 - Acquisition Parameters  
Date\_ 20120831  
Time 22.39  
INSTRUM av400  
PROBHD 5 mm QNP 1H/15  
PULPROG zgdc  
TD 32768  
SOLVENT DMSO  
NS 165  
DS 2  
SMH 23148.148 Hz  
FIDRES 0.706425 Hz  
AQ 0.7078604 sec  
RG 71.8  
DW 21.600 usec  
DE 6.00 usec  
TE 291.7 K  
D1 4.50000000 sec  
d11 0.03000000 sec  
MCREST 0.00000000 sec  
MCMRK 0.01500000 sec

----- CHANNEL f1 -----  
NUC1 13C  
P1 9.40 usec  
PL1 -4.00 dB  
SFO1 100.6236958 MHz

----- CHANNEL f2 -----  
CPDPRG2 waltz16  
NUC2 1H  
PCPD2 90.00 usec  
PL2 -3.00 dB  
PL12 14.00 dB  
SFO2 400.1316005 MHz

F2 - Processing parameters  
SI 32768  
SF 100.6128120 MHz  
WDW EM  
SSB 0  
LB 1.00 Hz  
GB 0  
PC 1.40

1D NMR plot parameters  
CX 22.00 cm  
CY 6.00 cm  
F1P 200.000 ppm  
F1 20122.56 Hz  
F2P -0.000 ppm  
F2 -0.00 Hz  
PPMCM 9.09091 ppm/cm  
HZCM 914.66193 Hz/cm

Figure 36.  $^{13}\text{C}$  NMR (100 MHz,  $\text{DMSO-}d_6$ ) spectra of compound 7d

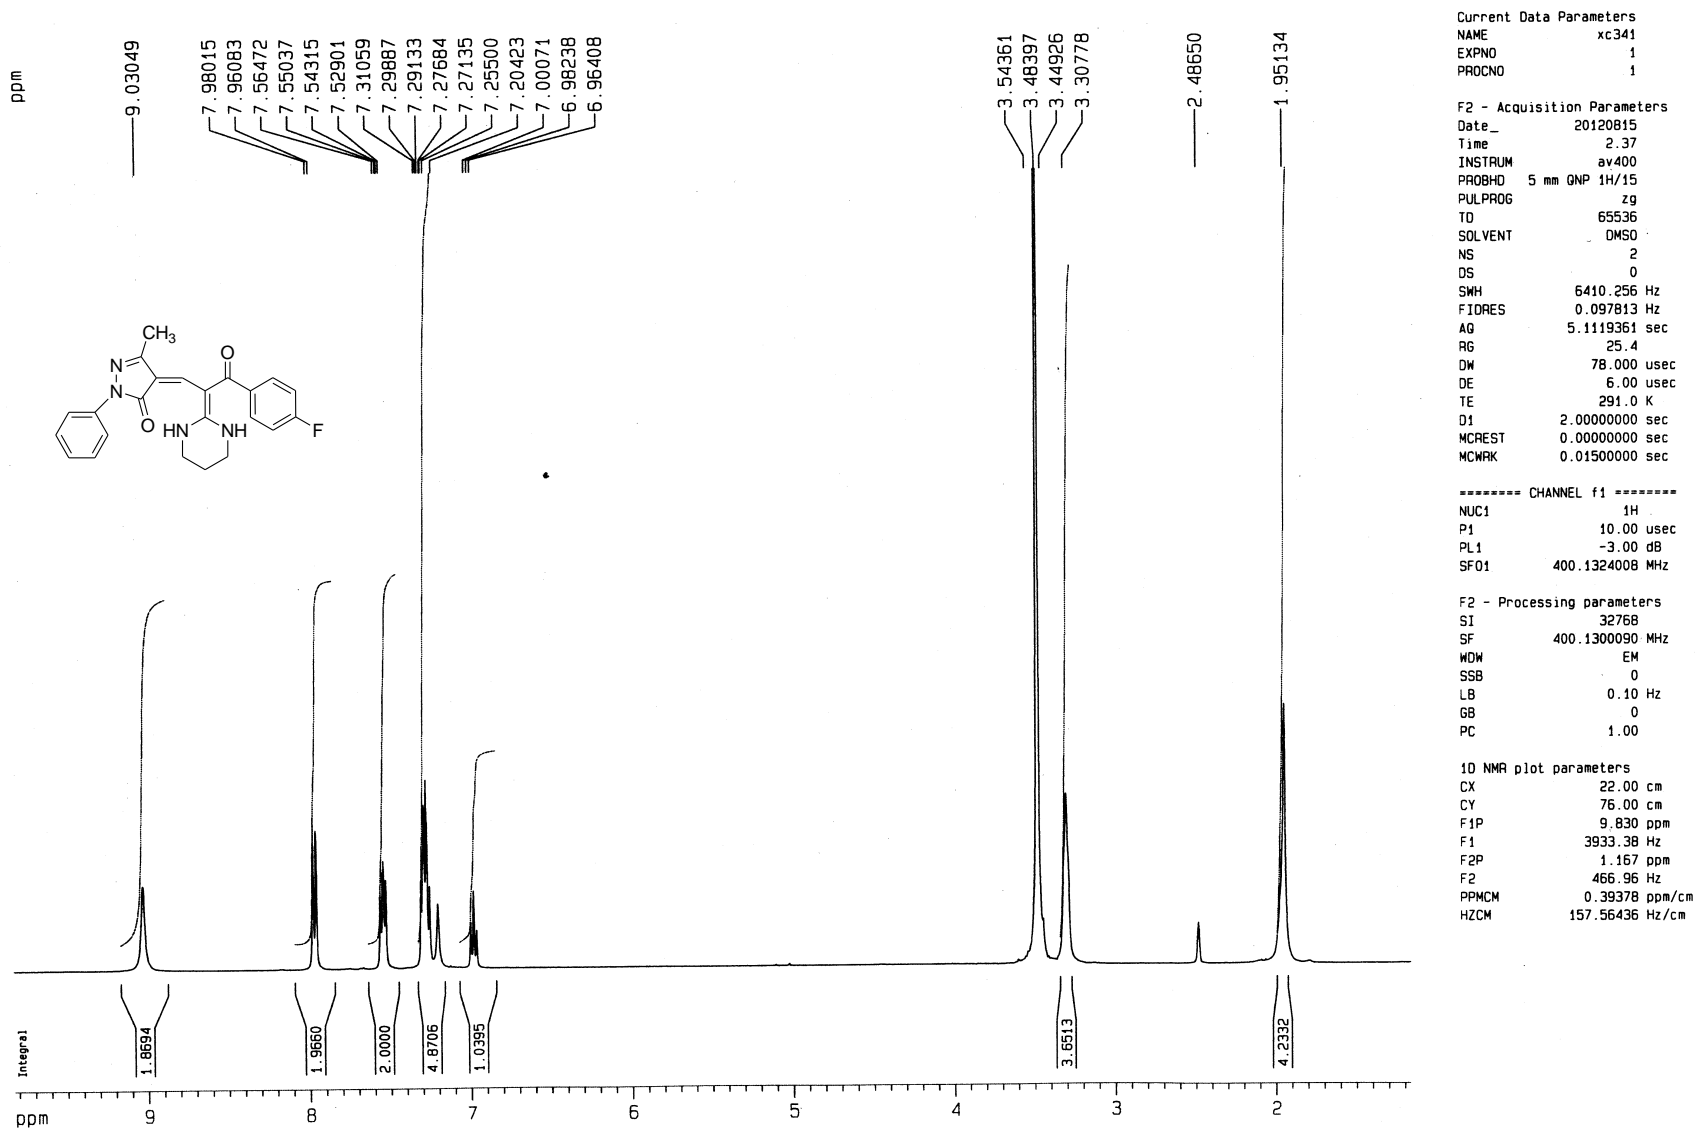

Figure 37. <sup>1</sup>H NMR (400 MHz, DMSO-*d*<sub>6</sub>) spectra of compound 7e

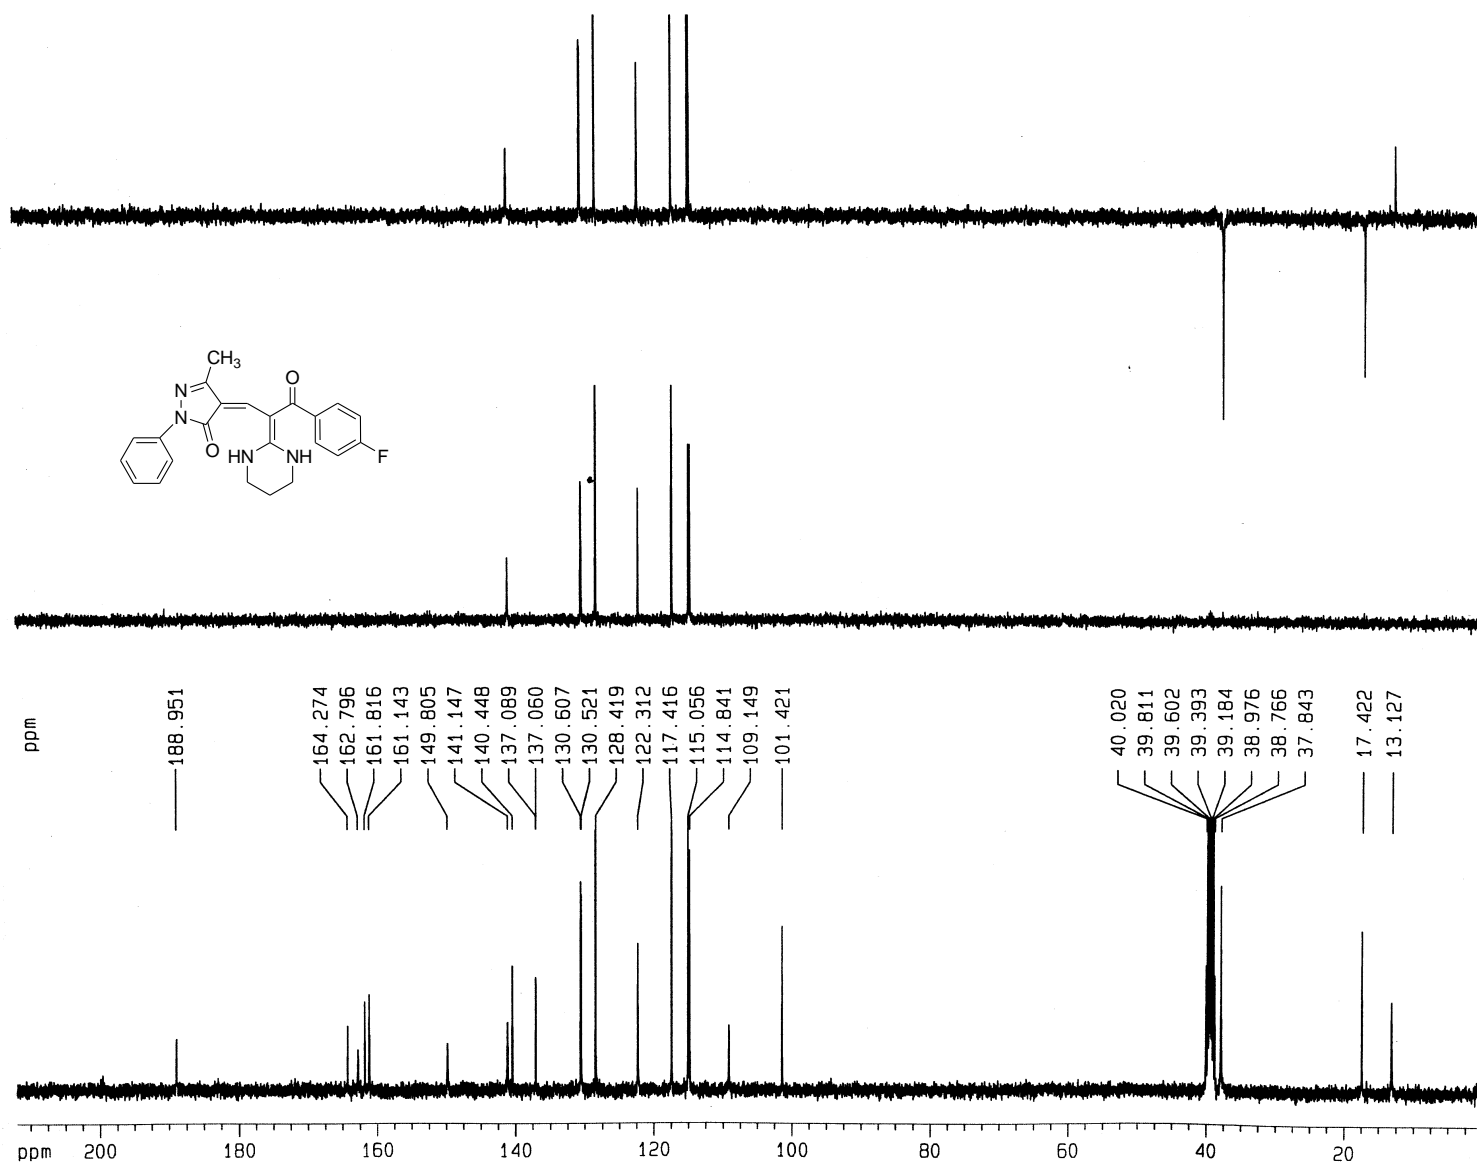

Current Data Parameters  
 NAME xc341  
 EXPNO 2  
 PROCNO 1

F2 - Acquisition Parameters  
 Date\_ 20120815  
 Time 2.53  
 INSTRUM av400  
 PROBHD 5 mm QNP 1H/15  
 PULPROG zgdc  
 TD 32768  
 SOLVENT DMSO  
 NS 168  
 DS 2  
 SMH 23148.148 Hz  
 FIDRES 0.706425 Hz  
 AQ 0.7078604 sec  
 RG 90.5  
 DW 21.600 usec  
 DE 6.00 usec  
 TE 291.7 K  
 D1 4.5000000 sec  
 d11 0.0300000 sec  
 MCREST 0.0000000 sec  
 MCWRK 0.0150000 sec

----- CHANNEL f1 -----  
 NUC1 13C  
 P1 9.40 usec  
 PL1 -4.00 dB  
 SF01 100.6236958 MHz

----- CHANNEL f2 -----  
 CPOPRG2 waltz16  
 NUC2 1H  
 PCPD2 90.00 usec  
 PL2 -3.00 dB  
 PL12 14.00 dB  
 SF02 400.1316005 MHz

F2 - Processing parameters  
 SI 32768  
 SF 100.6128120 MHz  
 WDW EM  
 SSB 0  
 LB 1.00 Hz  
 GB 0  
 PC 1.40

1D NMR plot parameters  
 CX 22.00 cm  
 CY 8.00 cm  
 F1P 212.000 ppm  
 F1 21329.92 Hz  
 F2P 0.000 ppm  
 F2 0.00 Hz  
 PPMCH 9.63636 ppm/cm  
 HZCM 969.54156 Hz/cm

Figure 38. <sup>13</sup>C NMR (100 MHz, DMSO-*d*<sub>6</sub>) spectra of compound 7e



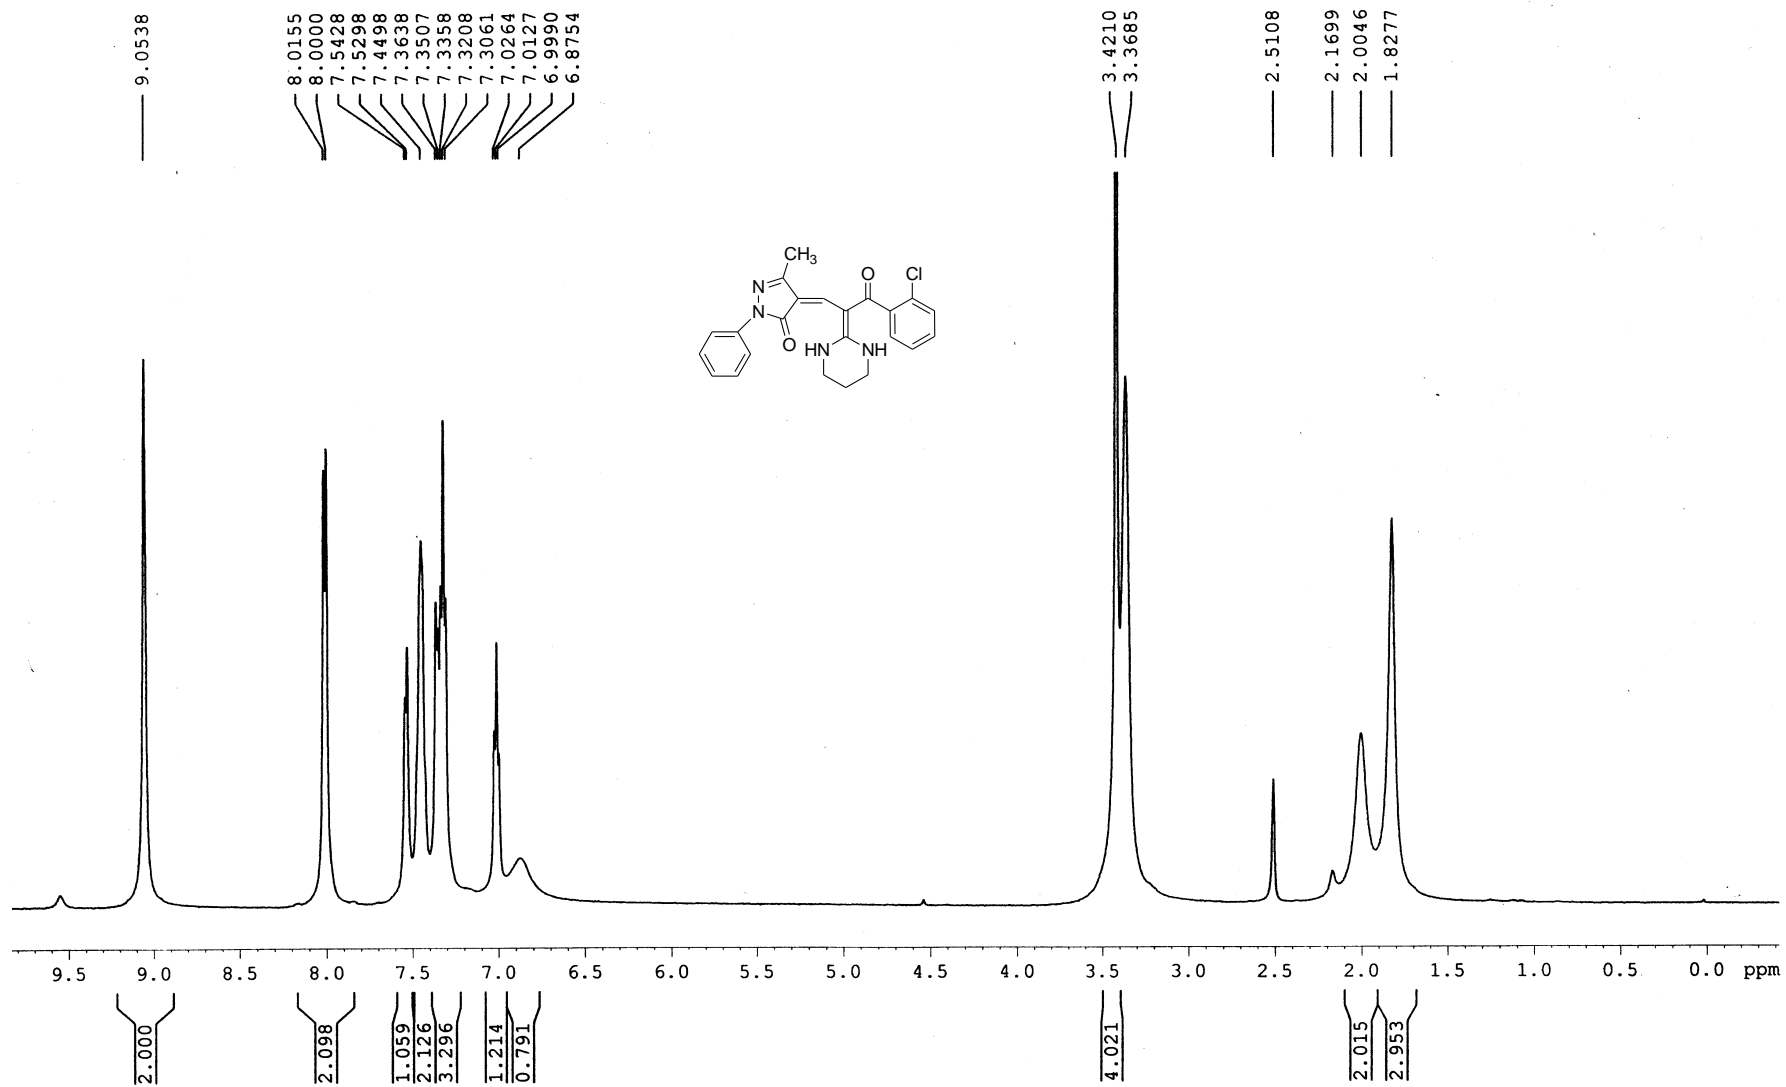

Figure 39. <sup>1</sup>H NMR (500 MHz, DMSO-*d*<sub>6</sub>) spectra of compound **7f**

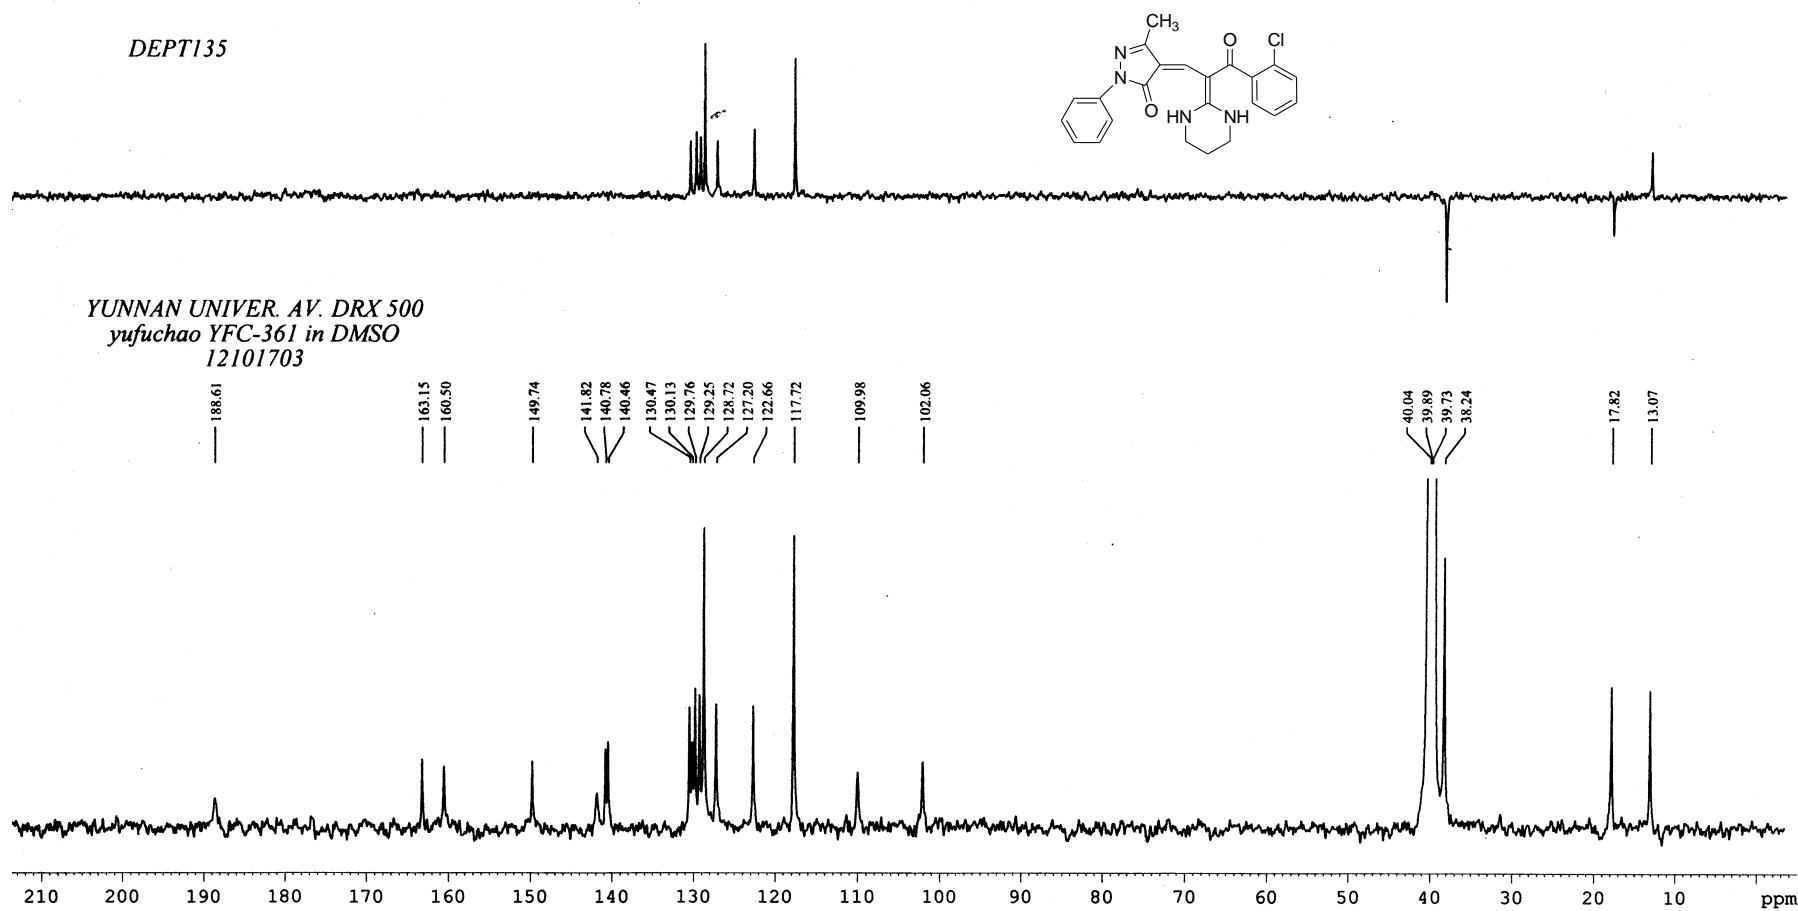

Figure 40.  $^{13}\text{C}$  NMR (125 MHz,  $\text{DMSO}-d_6$ ) spectra of compound 7f

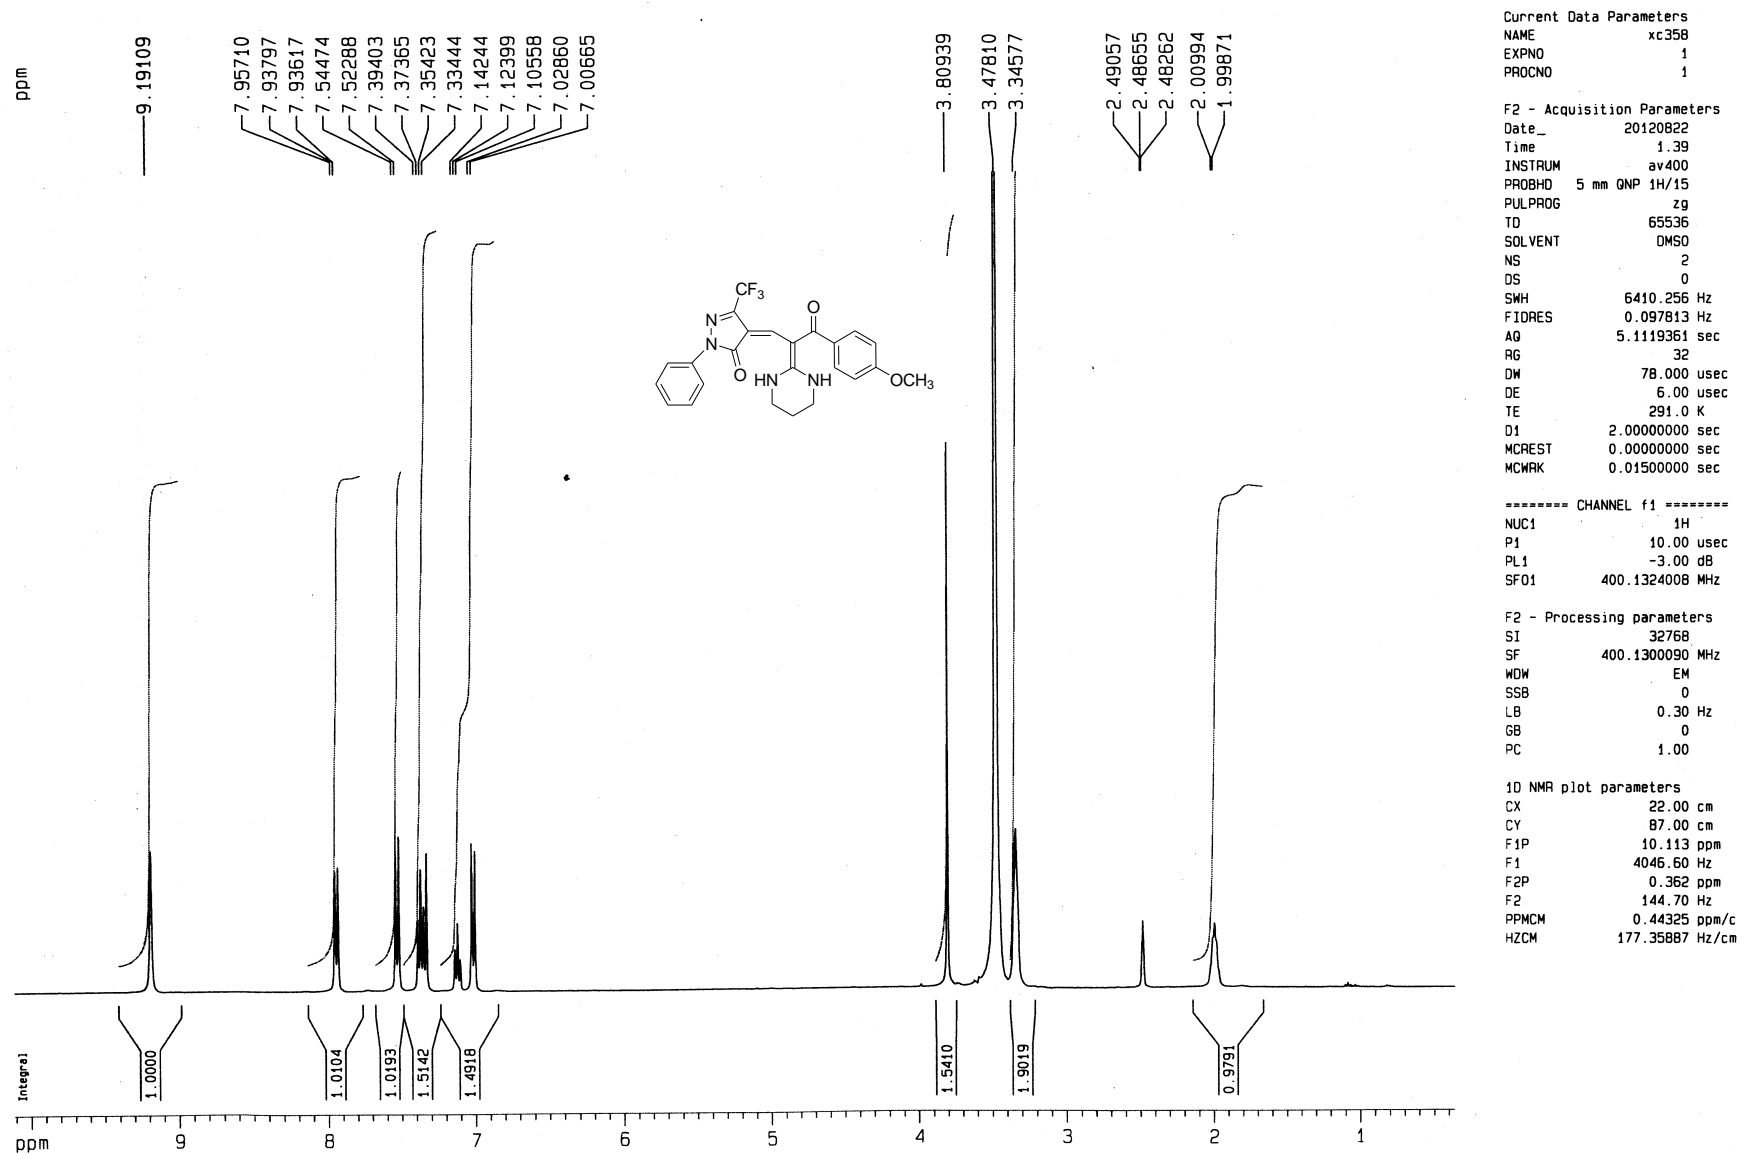

Figure 41.  $^1\text{H}$  NMR (400 MHz,  $\text{DMSO}-d_6$ ) spectra of compound **7g**

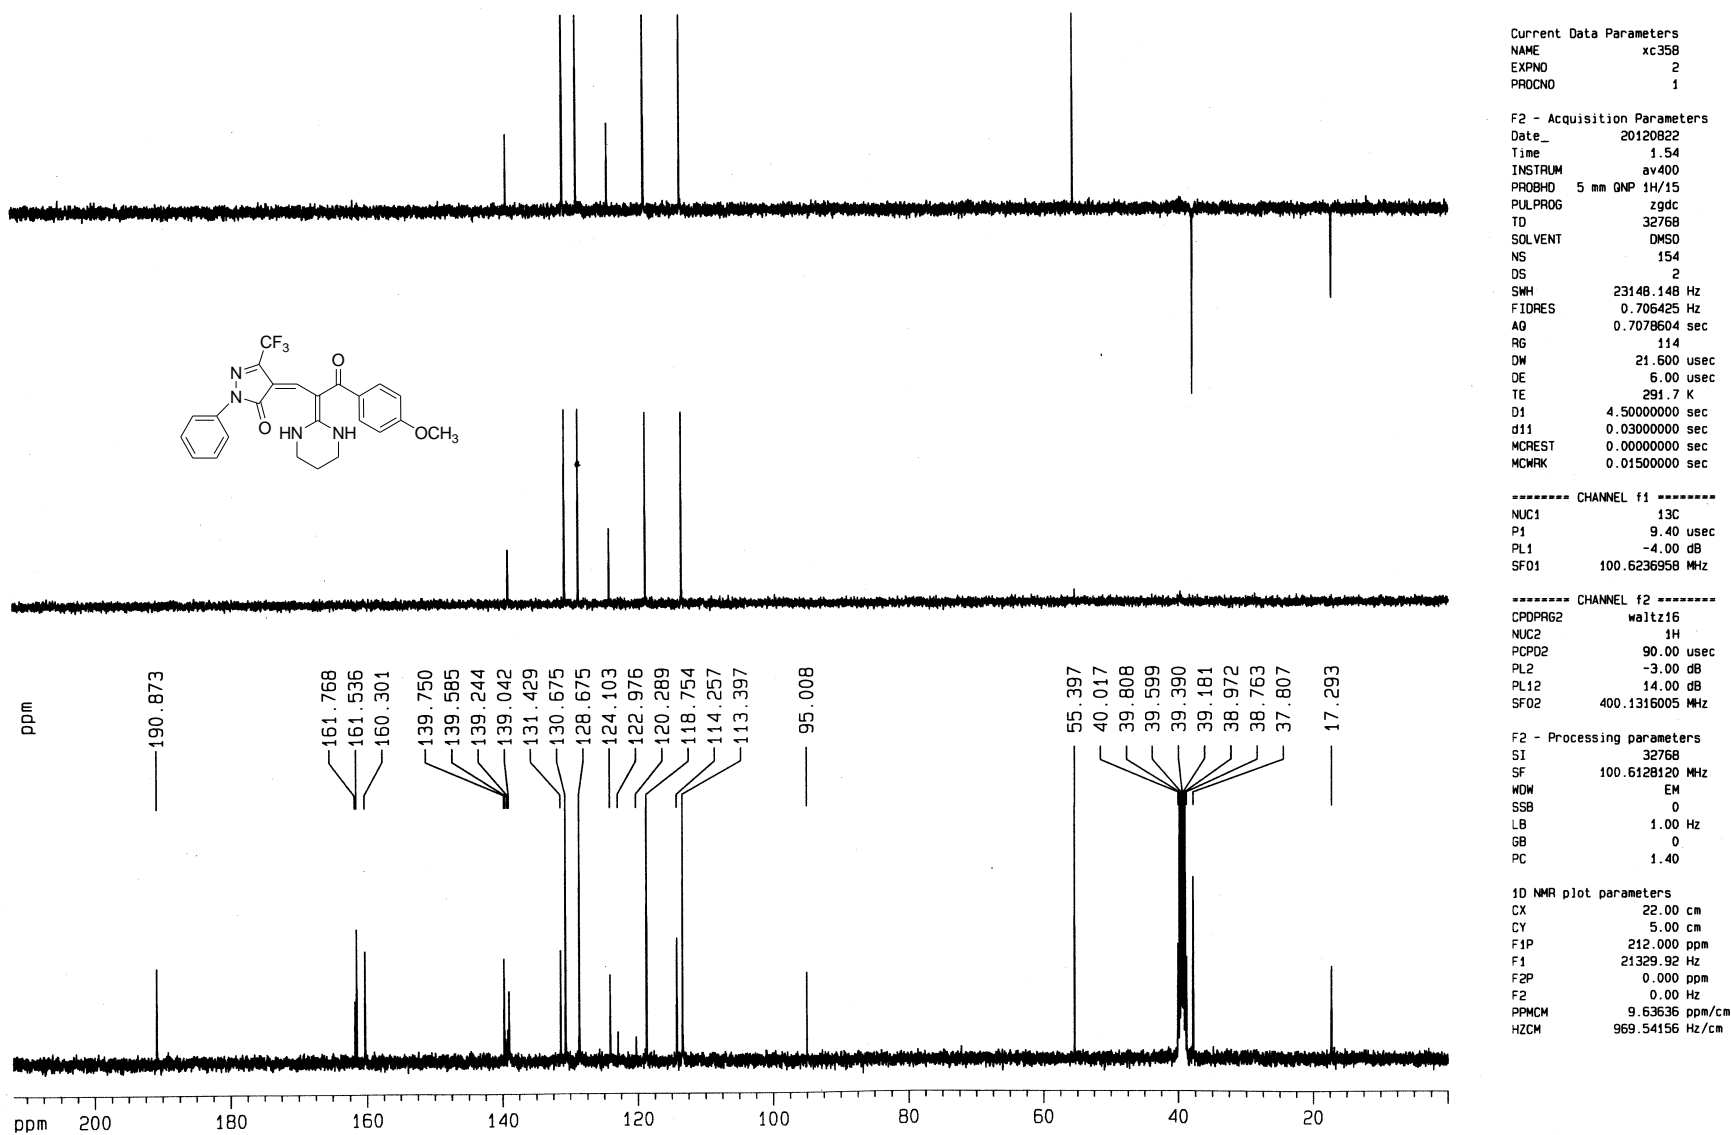

Figure 42. <sup>13</sup>C NMR (100 MHz, DMSO-d<sub>6</sub>) spectra of compound 7g

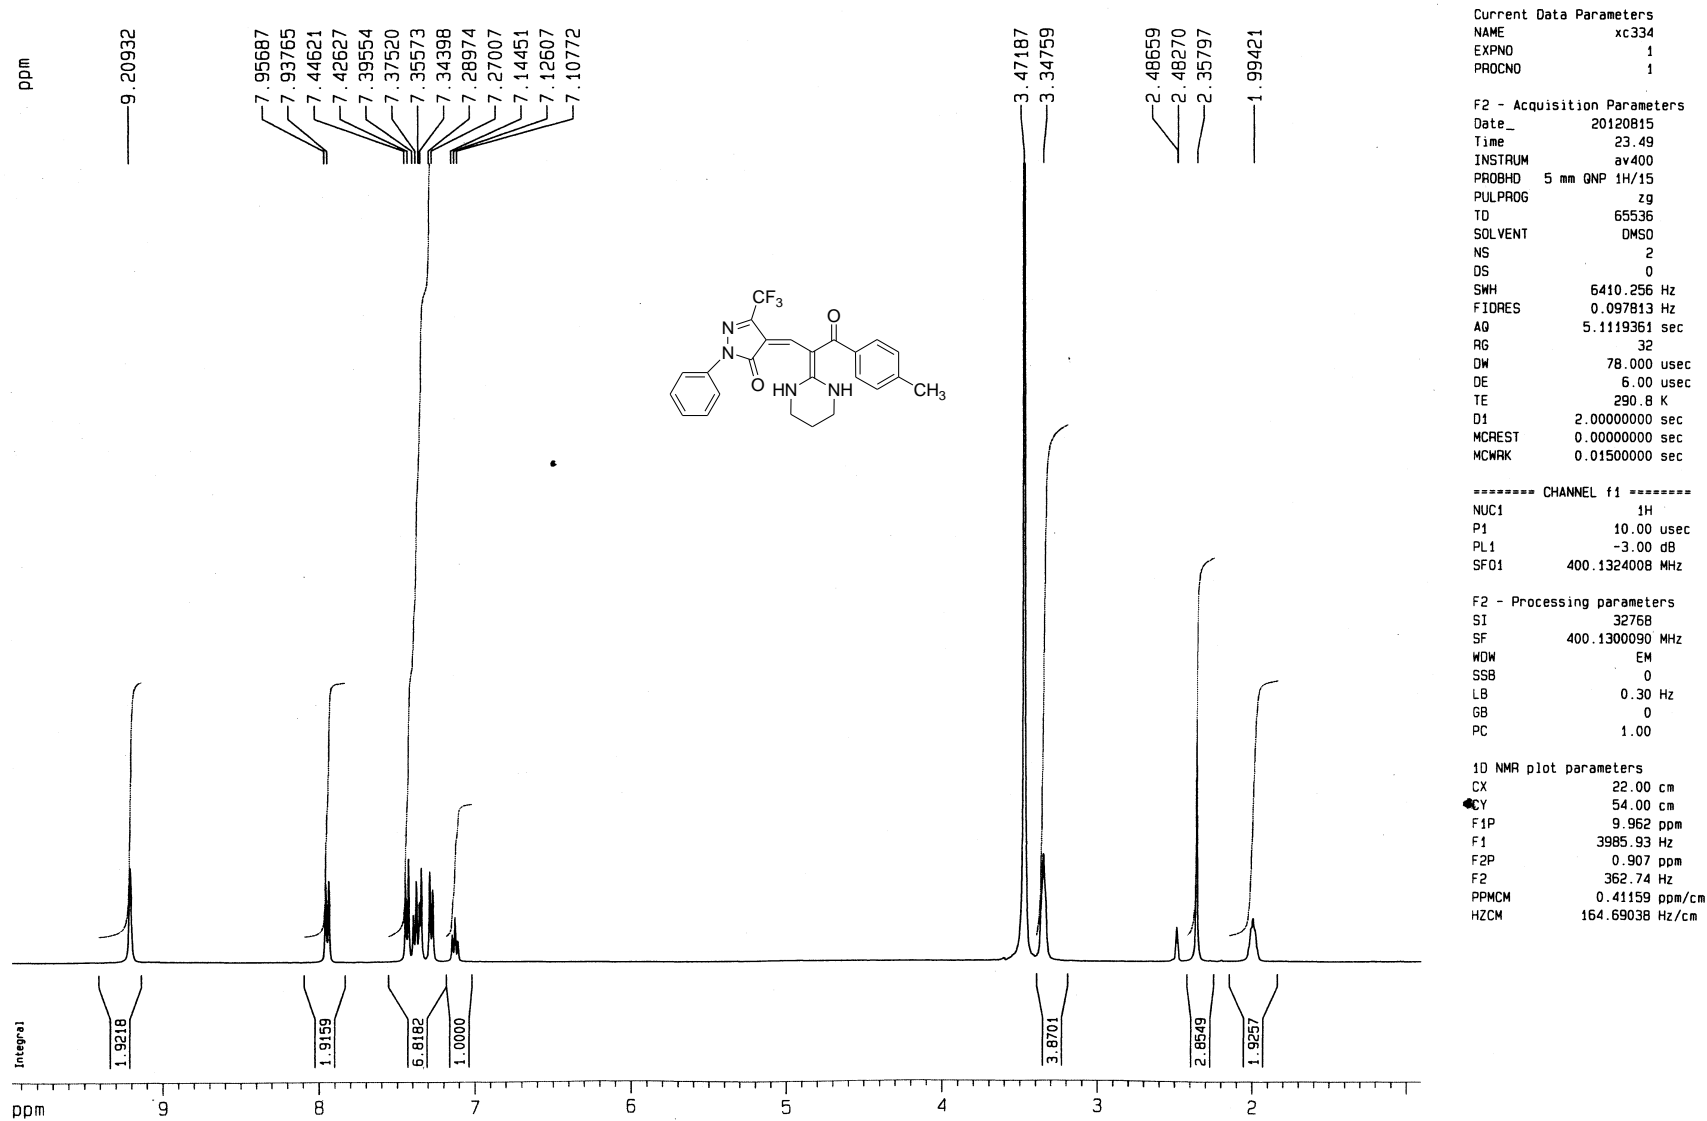

Figure 43. <sup>1</sup>H NMR (400 MHz, DMSO-*d*<sub>6</sub>) spectra of compound 7h

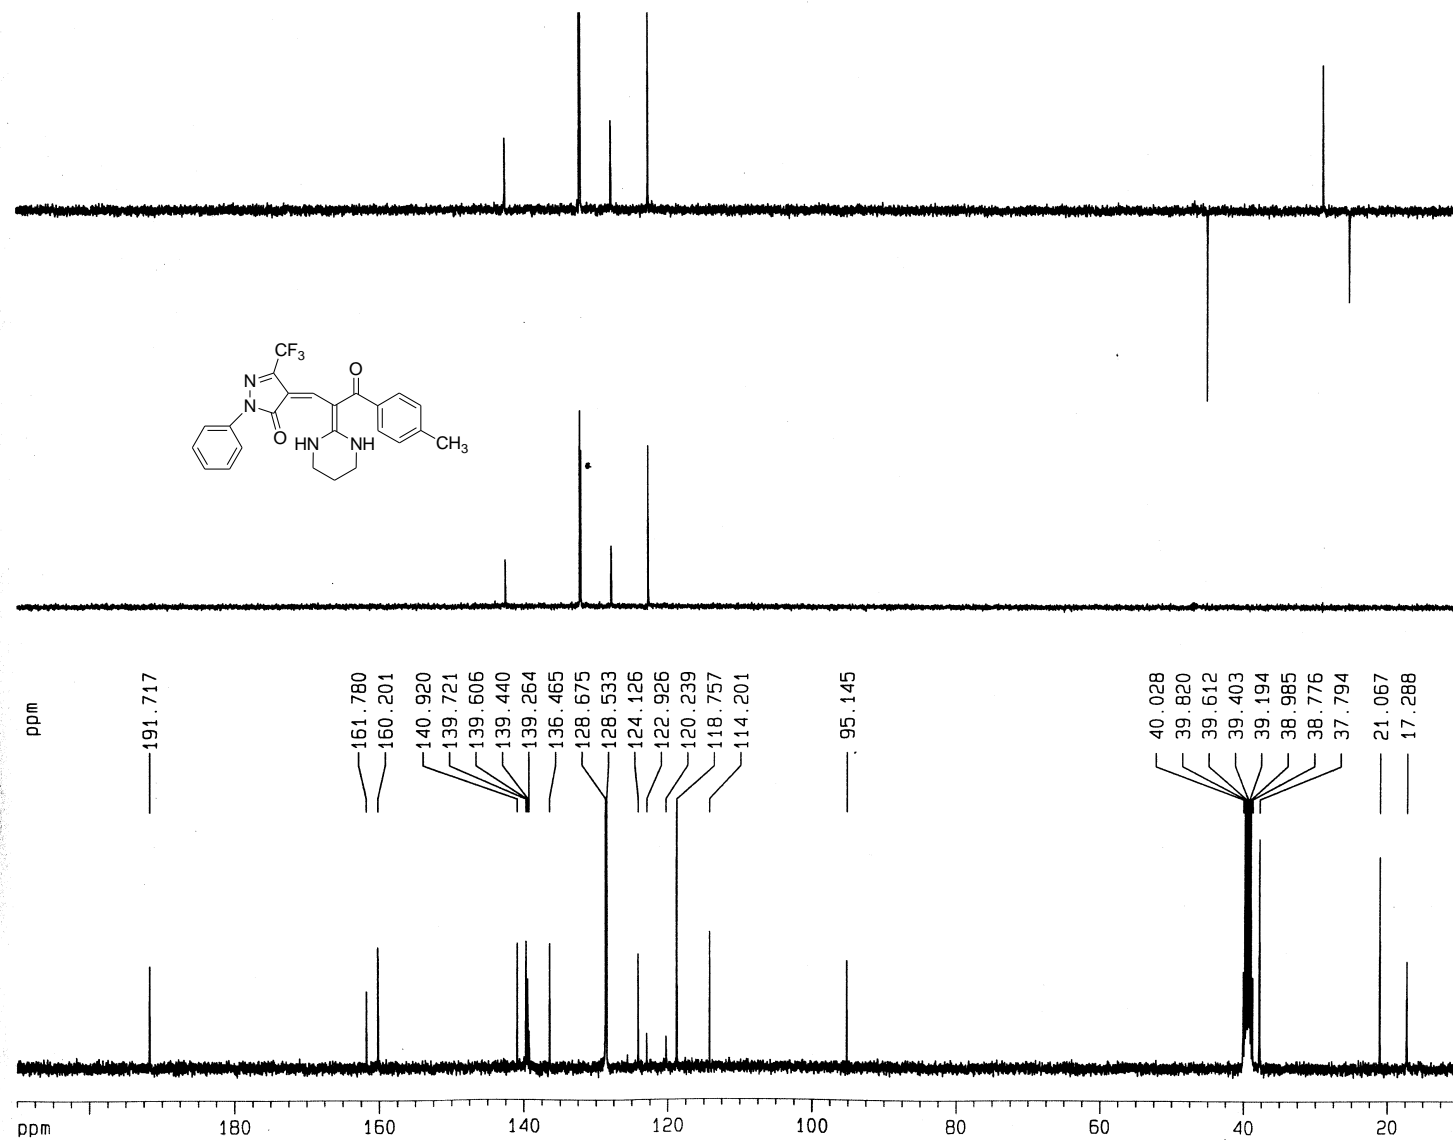

Current Data Parameters  
NAME xc334  
EXPNO 2  
PROCNO 1

F2 - Acquisition Parameters  
Date\_ 20120816  
Time 0.04  
INSTRUM av400  
PROBHD 5 mm QNP 1H/15  
PULPROG zgdc  
TD 32768  
SOLVENT DMSO  
NS 168  
DS 2  
SWH 23148.148 Hz  
FIDRES 0.706425 Hz  
AQ 0.7078604 sec  
RG 114  
DW 21.600 usec  
DE 6.00 usec  
TE 291.6 K  
D1 4.5000000 sec  
d11 0.0300000 sec  
MCREST 0.0000000 sec  
MCWRK 0.0150000 sec

----- CHANNEL f1 -----  
NUC1 13C  
P1 9.40 usec  
PL1 -4.00 dB  
SF01 100.6236958 MHz

----- CHANNEL f2 -----  
CPDPRG2 waltz16  
NUC2 1H  
PCPD2 90.00 usec  
PL2 -3.00 dB  
PL12 14.00 dB  
SF02 400.1316005 MHz

F2 - Processing parameters  
SI 32768  
SF 100.6128120 MHz  
WDW EM  
SSB 0  
LB 1.00 Hz  
GB 0  
PC 2.00

1D NMR plot parameters  
CX 22.00 cm  
CY 8.00 cm  
F1P 210.000 ppm  
F1 21128.69 Hz  
F2P 9.000 ppm  
F2 905.52 Hz  
PPMCM 9.13636 ppm/cm  
HZCM 919.23517 Hz/cm

Figure 44.  $^{13}\text{C}$  NMR (100 MHz,  $\text{DMSO}-d_6$ ) spectra of compound 7h

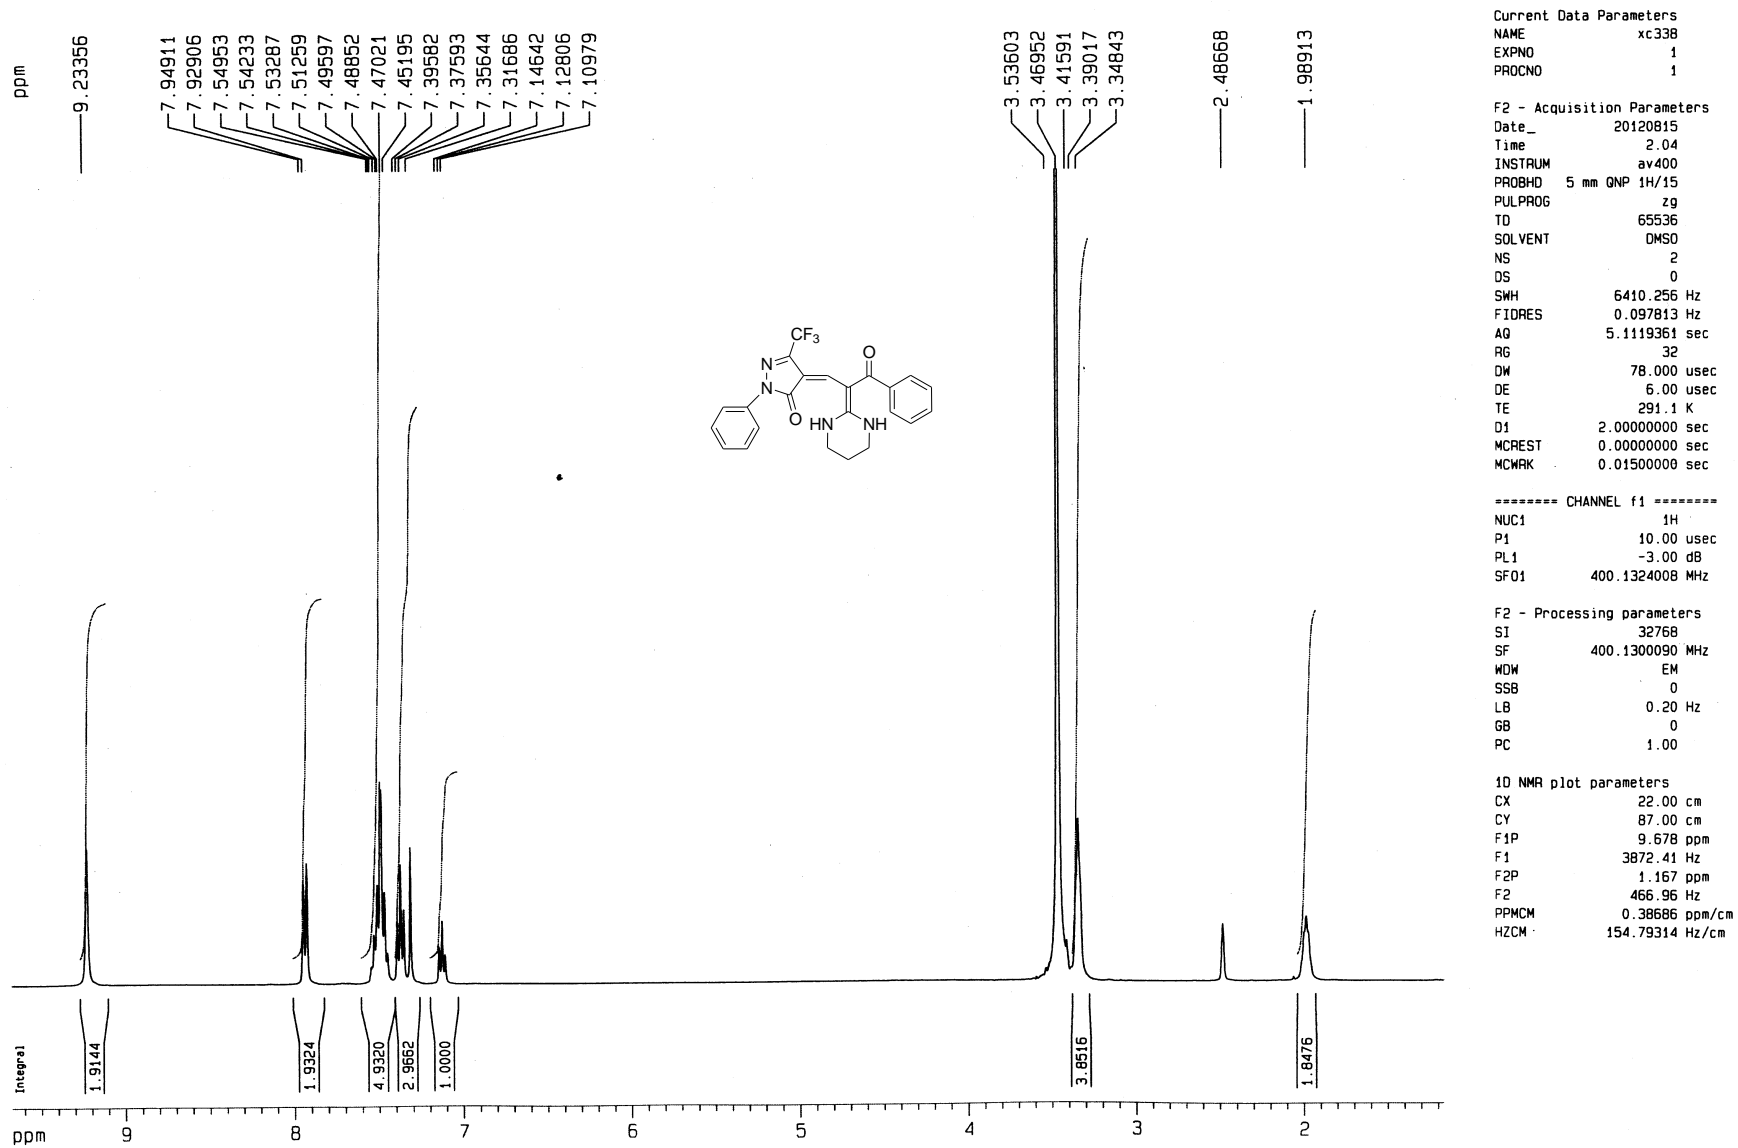

Figure 45. <sup>1</sup>H NMR (400 MHz, DMSO-*d*<sub>6</sub>) spectra of compound 7i

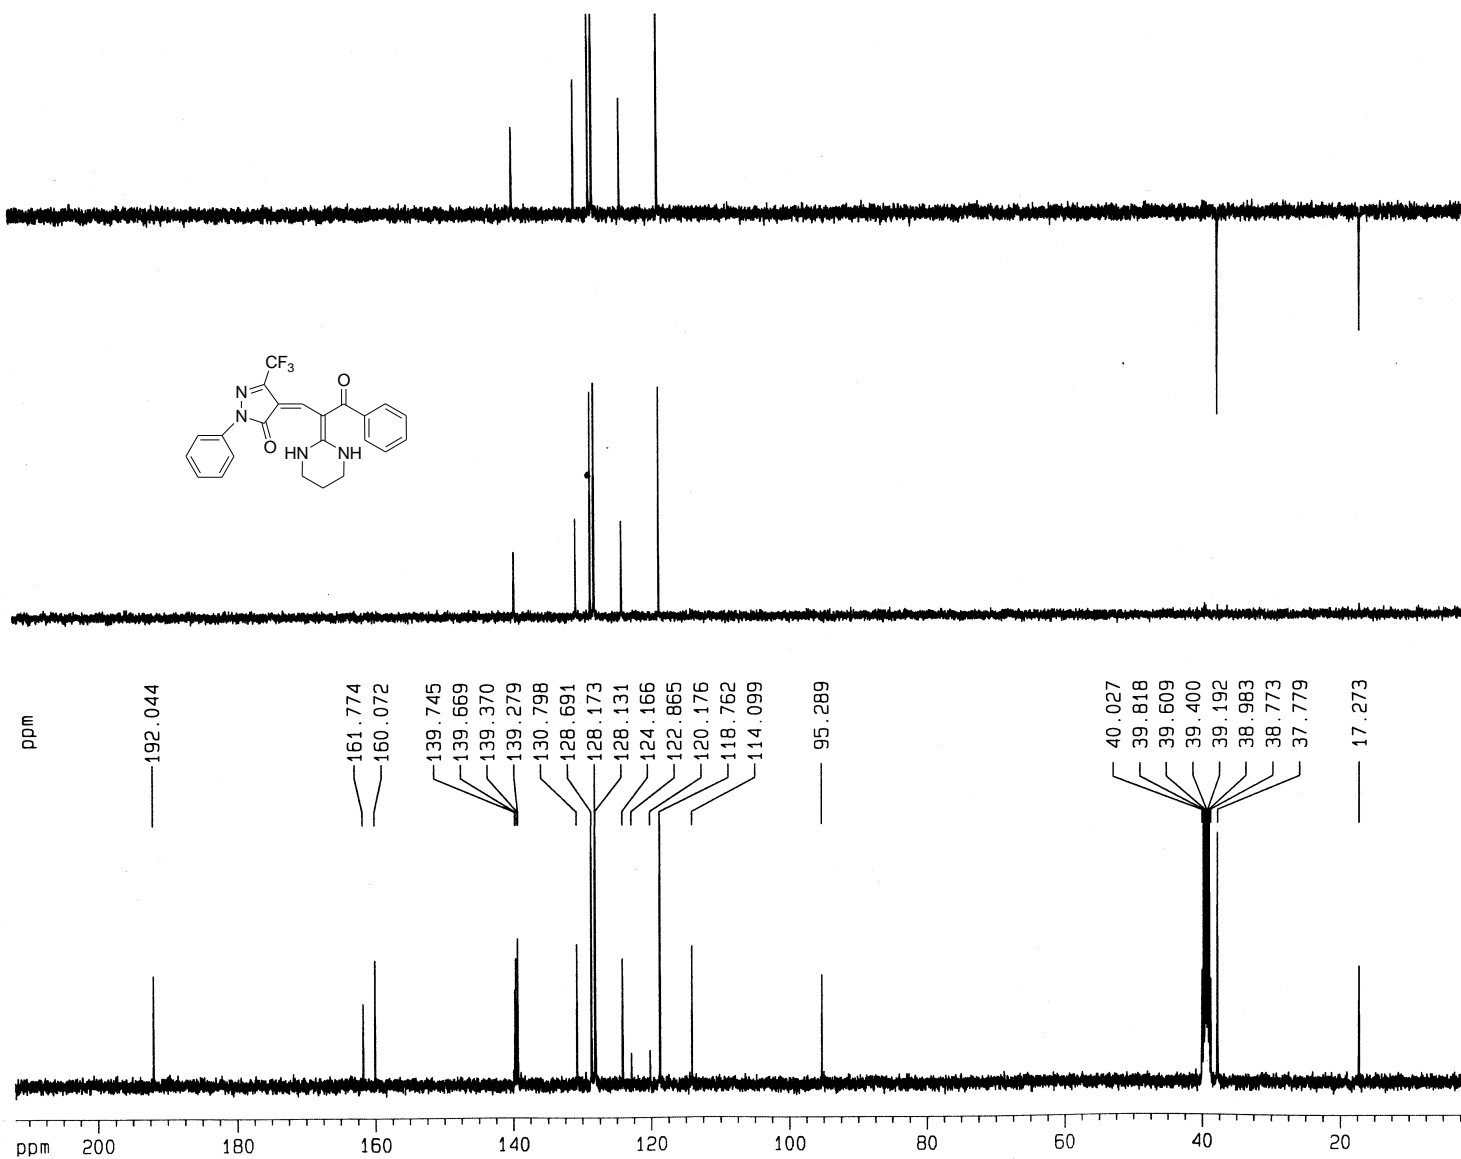

```
Current Data Parameters
NAME          xc338
EXPNO         2
PROCNO        1

F2 - Acquisition Parameters
Date_         20120815
Time          2.20
INSTRUM       av400
PROBHD        5 mm QNP 1H/15
PULPROG       zgdc
TD            32768
SOLVENT       DMSO
NS            168
DS            2
SMH           23148.148 Hz
FIDRES        0.706425 Hz
AQ            0.7078604 sec
RG            143.7
DW            21.600 usec
DE            6.00 usec
TE            291.8 K
D1            4.50000000 sec
d11           0.03000000 sec
MCREST        0.00000000 sec
MCWRK         0.01500000 sec

----- CHANNEL f1 -----
NUC1           13C
P1             9.40 usec
PL1            -4.00 dB
SFO1          100.6236958 MHz

----- CHANNEL f2 -----
CPDPRG2       waltz16
NUC2           1H
PCPD2         90.00 usec
PL2            -3.00 dB
PL12          14.00 dB
SFO2          400.1316005 MHz

F2 - Processing parameters
SI            32768
SF            100.6128120 MHz
WDW           EM
SSB           0
LB            1.00 Hz
GB            0
PC            1.40

1D NMR plot parameters
CX            22.00 cm
CY            6.60 cm
F1P           212.000 ppm
F1            21329.92 Hz
F2P           0.000 ppm
F2            0.00 Hz
PPMCM         9.63636 ppm/cm
HZCM          969.54156 Hz/cm
```

Figure 46.  $^{13}\text{C}$  NMR (100 MHz,  $\text{DMSO-}d_6$ ) spectra of compound 7i



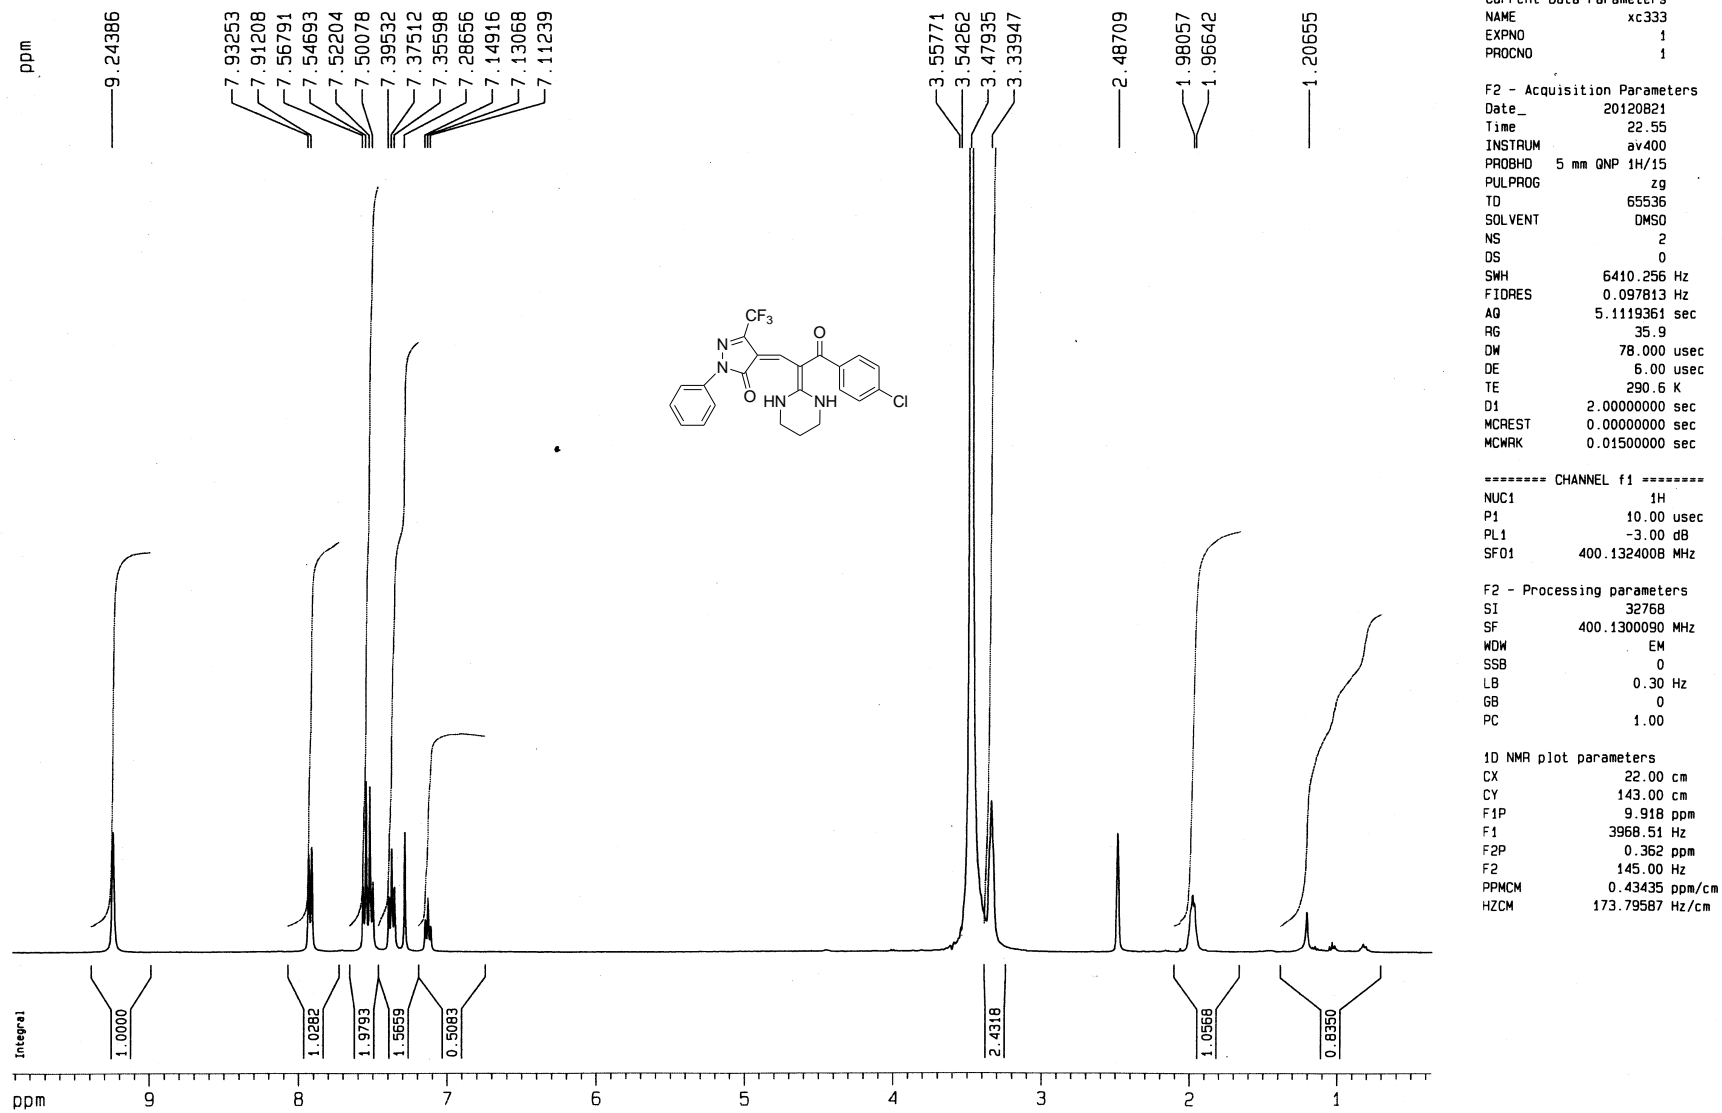

Figure 47.  $^1\text{H}$  NMR (400 MHz,  $\text{DMSO}-d_6$ ) spectra of compound 7j

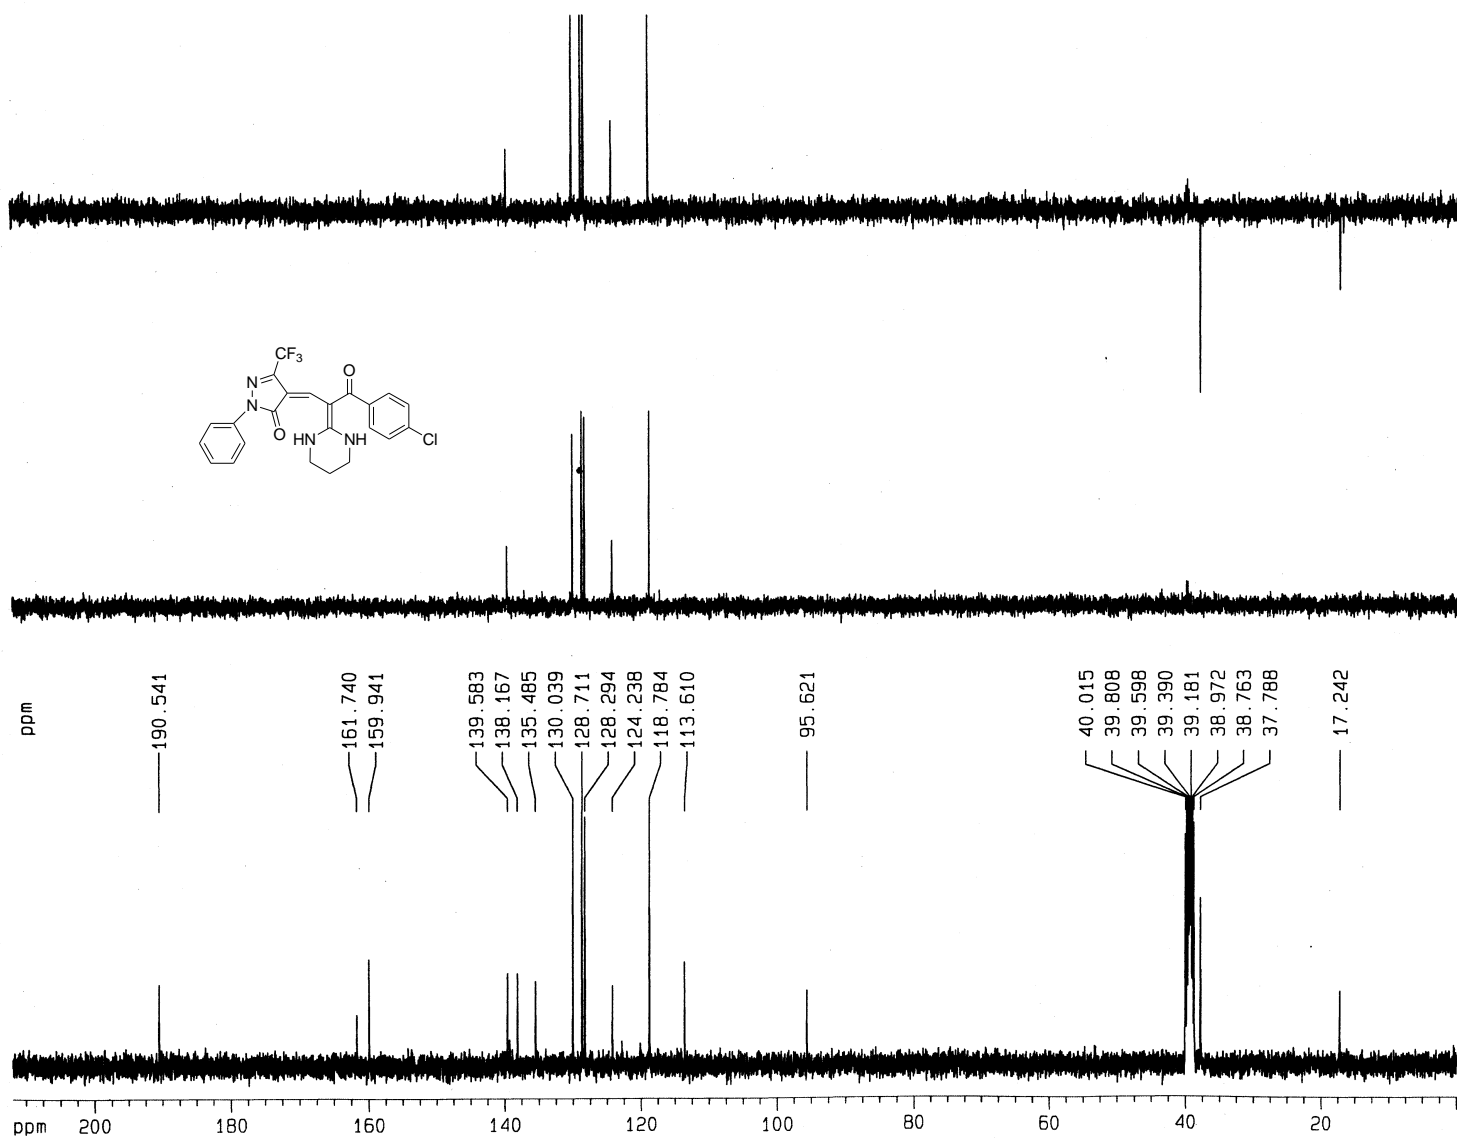

Current Data Parameters  
NAME xc333  
EXPNO 2  
PROCNO 1

F2 - Acquisition Parameters  
Date\_ 20120821  
Time 23.09  
INSTRUM av400  
PROBHD 5 mm GNP 1H/15  
PULPROG zgdc  
TD 32768  
SOLVENT DMSO  
NS 154  
DS 2  
SWH 23148.148 Hz  
FIDRES 0.706425 Hz  
AQ 0.7078604 sec  
RG 80.6  
DM 21.600 usec  
DE 6.00 usec  
TE 291.2 K  
D1 4.5000000 sec  
d11 0.0300000 sec  
MCREST 0.0000000 sec  
MCNRK 0.01500000 sec

----- CHANNEL f1 -----  
NUC1 13C  
P1 9.40 usec  
PL1 -4.00 dB  
SF01 100.6236958 MHz

----- CHANNEL f2 -----  
CPDPRG2 waltz16  
NUC2 1H  
PCPD2 90.00 usec  
PL2 -3.00 dB  
PL12 14.00 dB  
SF02 400.1316005 MHz

F2 - Processing parameters  
SI 32768  
SF 100.6128120 MHz  
WDW EM  
SSB 0  
LB 1.00 Hz  
GB 0  
PC 1.40

1D NMR plot parameters  
CX 22.00 cm  
CY 4.50 cm  
F1P 212.000 ppm  
F1 21329.92 Hz  
F2P 0.000 ppm  
F2 0.00 Hz  
PPMCH 9.63636 ppm/cm  
HZCM 969.54156 Hz/cm

Figure 48.  $^{13}\text{C}$  NMR (100 MHz,  $\text{DMSO-}d_6$ ) spectra of compound 7j

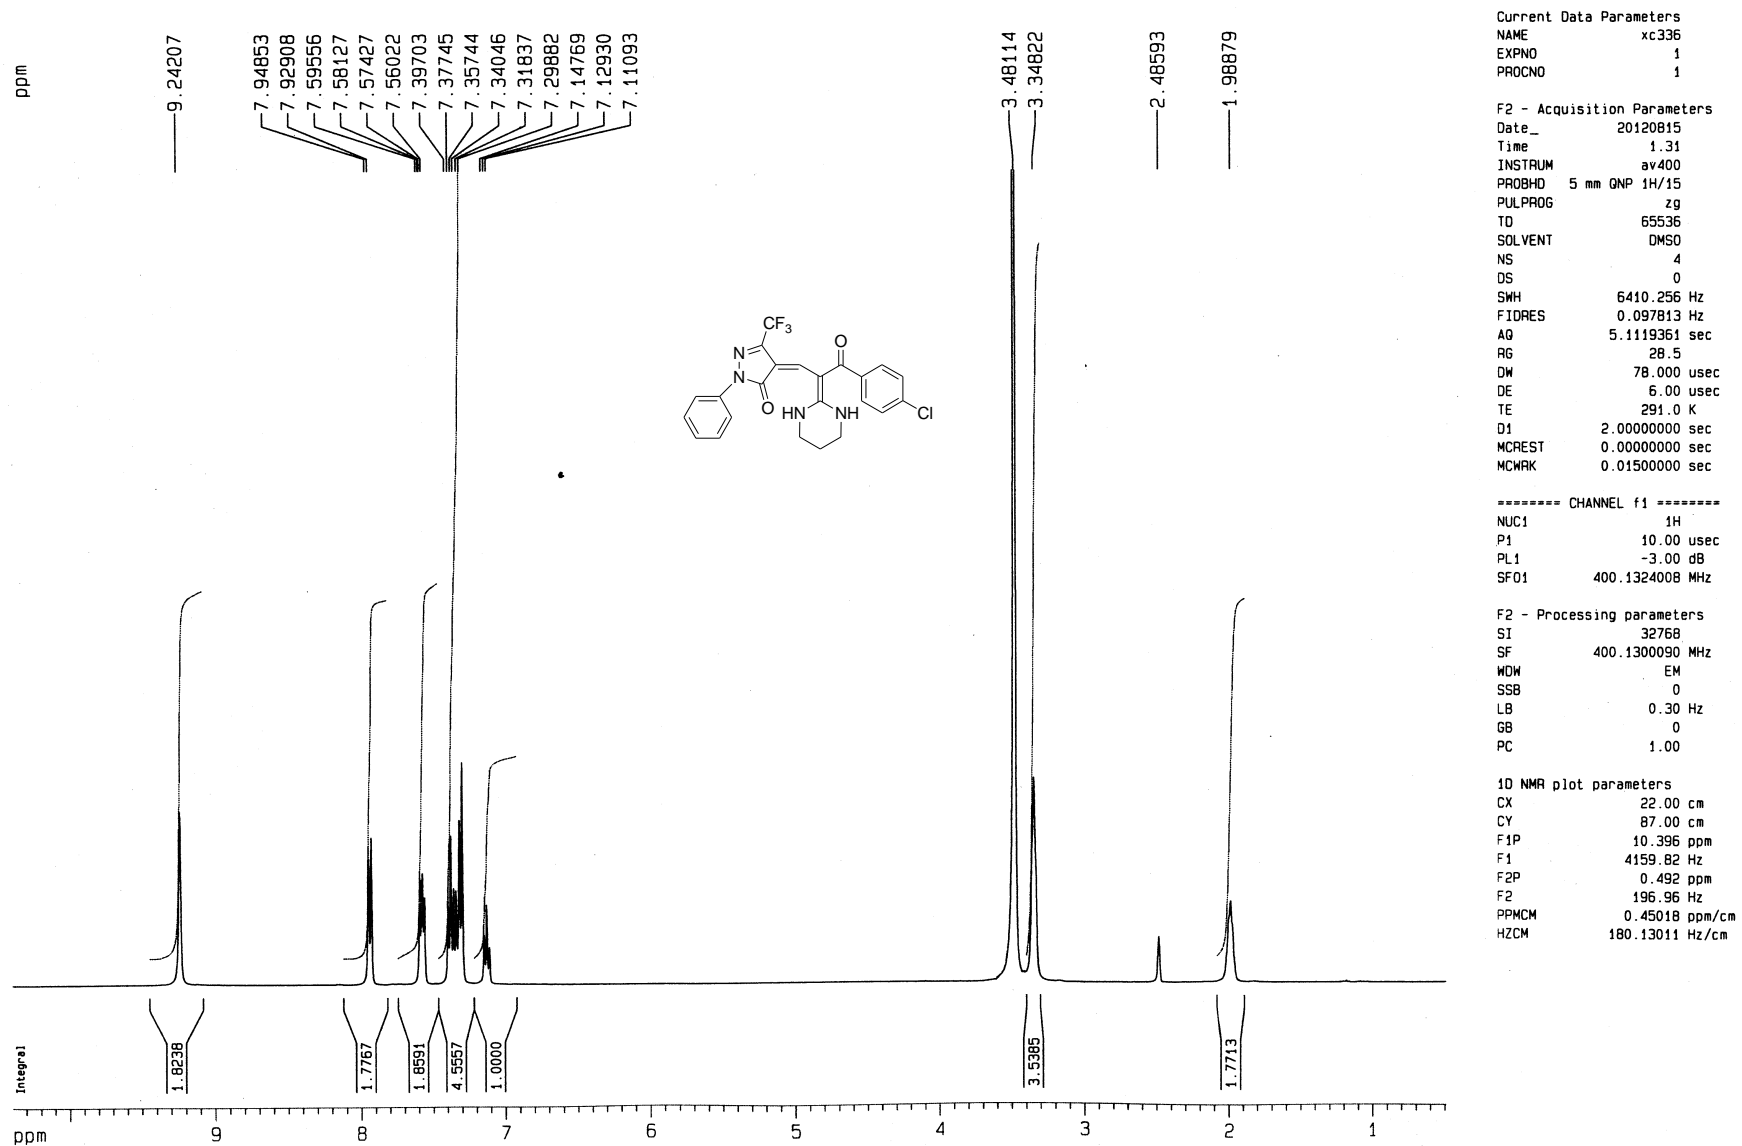

Figure 49. <sup>1</sup>H NMR (400 MHz, DMSO-*d*<sub>6</sub>) spectra of compound 7k

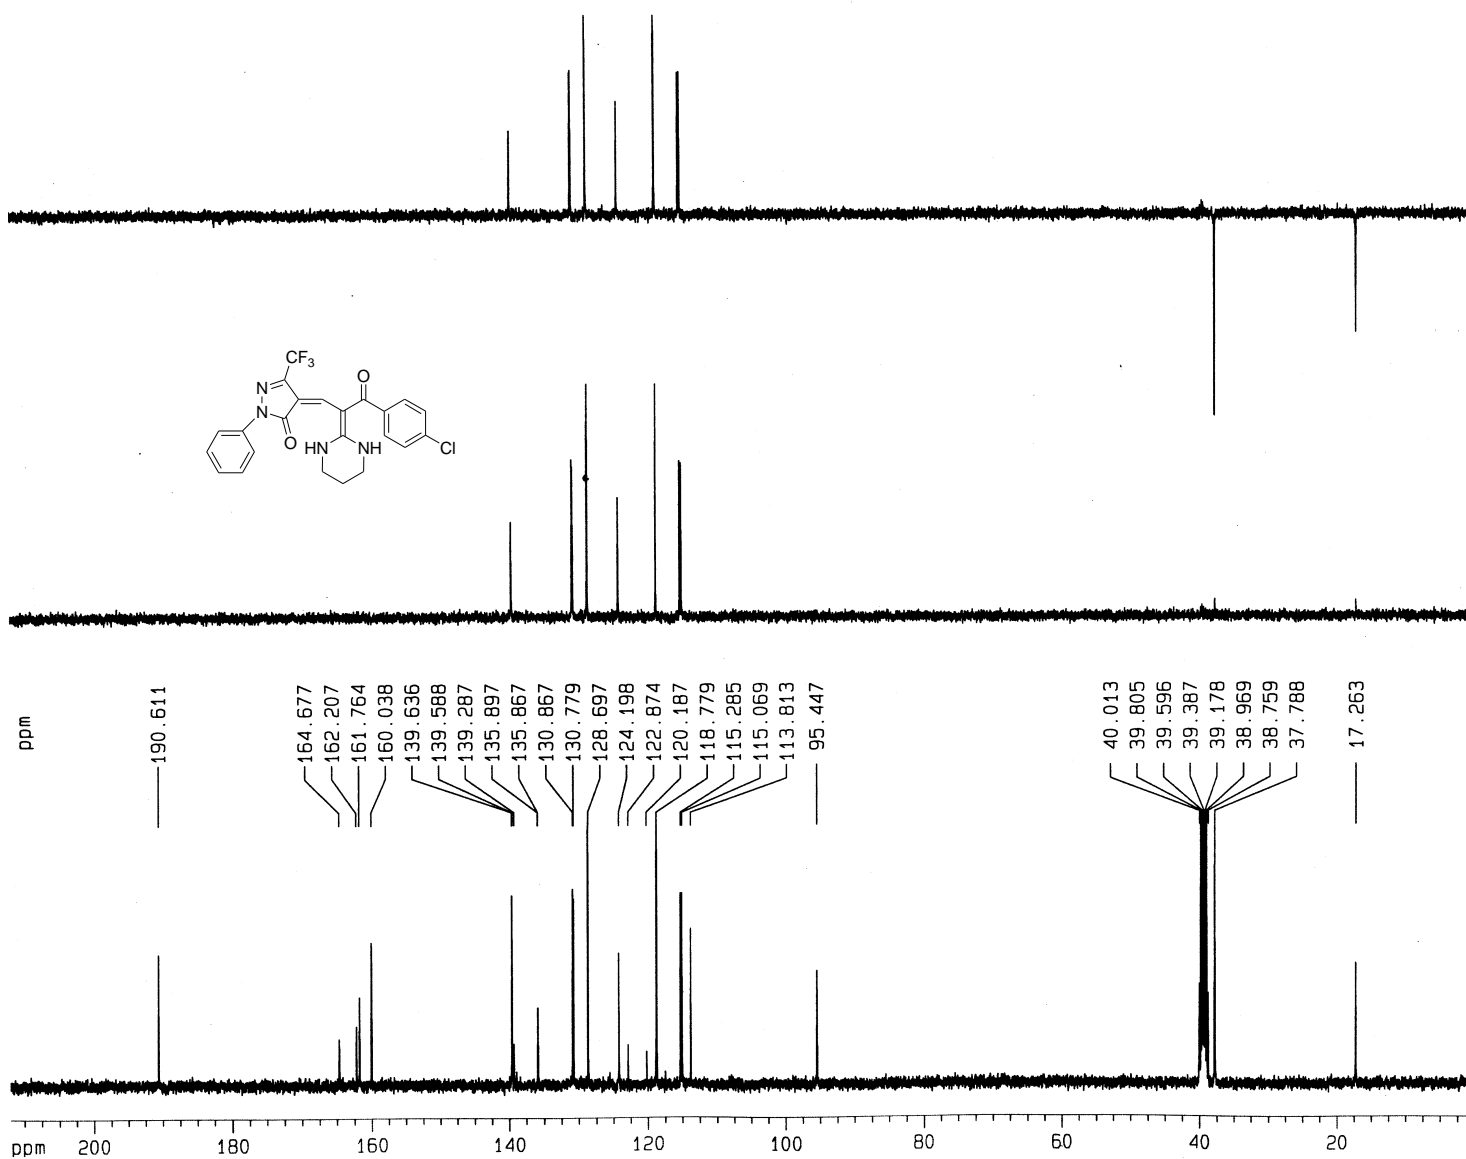

```

Current Data Parameters
NAME          xc336
EXPNO         2
PROCNO        1

F2 - Acquisition Parameters
Date_         20120815
Time          1.46
INSTRUM       av400
PROBHD        5 mm QNP 1H/15
PULPROG       zgdc
TD            32768
SOLVENT       DMSO
NS            168
DS            2
SWH           23148.148 Hz
FIDRES        0.706425 Hz
AQ            0.7078604 sec
RG            101.6
DW            21.600 usec
DE            6.00 usec
TE            291.7 K
D1            4.5000000 sec
d11           0.0300000 sec
MCREST        0.0000000 sec
MCWPRK        0.0150000 sec

----- CHANNEL f1 -----
NUC1          13C
P1            9.40 usec
PL1           -4.00 dB
SF01         100.6236958 MHz

----- CHANNEL f2 -----
CPDPRG2       waltz16
NUC2          1H
PCPD2         90.00 usec
PL2           -3.00 dB
PL12          14.00 dB
SF02         400.1316005 MHz

F2 - Processing parameters
SI            32768
SF            100.6128120 MHz
WDW           EM
SSB           0
LB            1.00 Hz
GB            0
PC            1.40

1D NMR plot parameters
CX            22.00 cm
CY            6.60 cm
F1P           212.000 ppm
F1            21329.92 Hz
F2P           0.000 ppm
F2            0.00 Hz
PPMCM         9.63636 ppm/cm
HZCM          969.54156 Hz/cm
    
```

Figure 50.  $^{13}\text{C}$  NMR (100 MHz,  $\text{DMSO-}d_6$ ) spectra of compound 7k

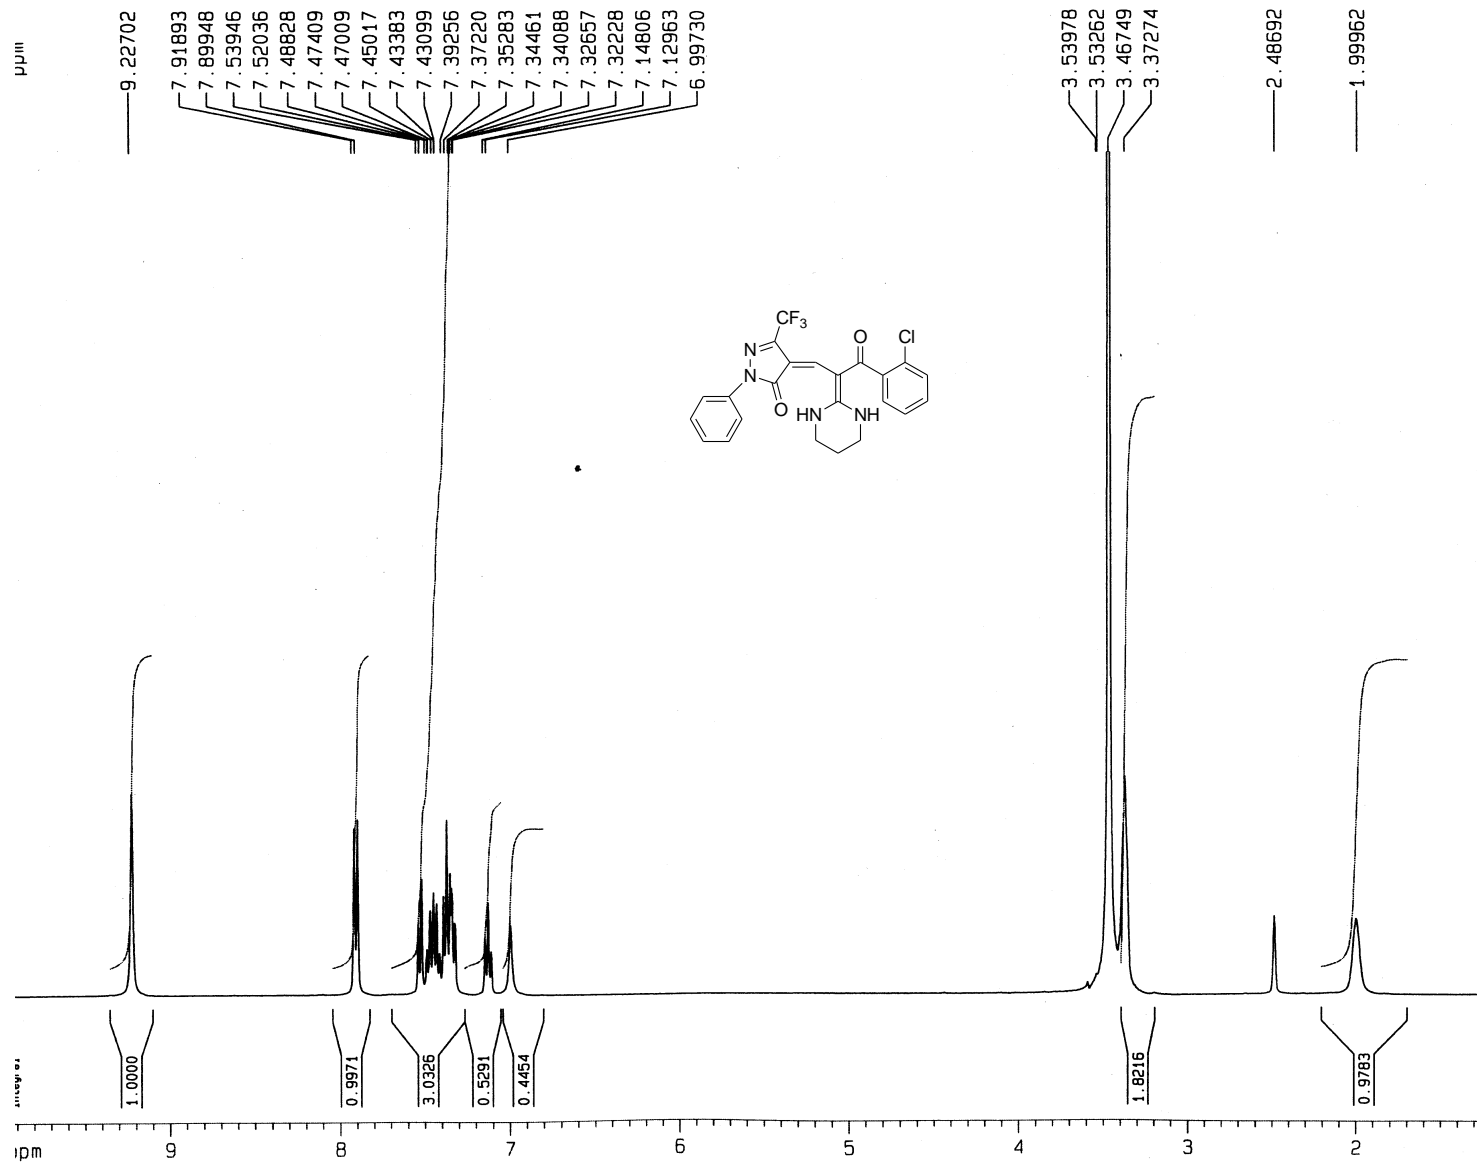

Figure S1.  $^1\text{H}$  NMR (400 MHz,  $\text{DMSO-}d_6$ ) spectra of compound 71

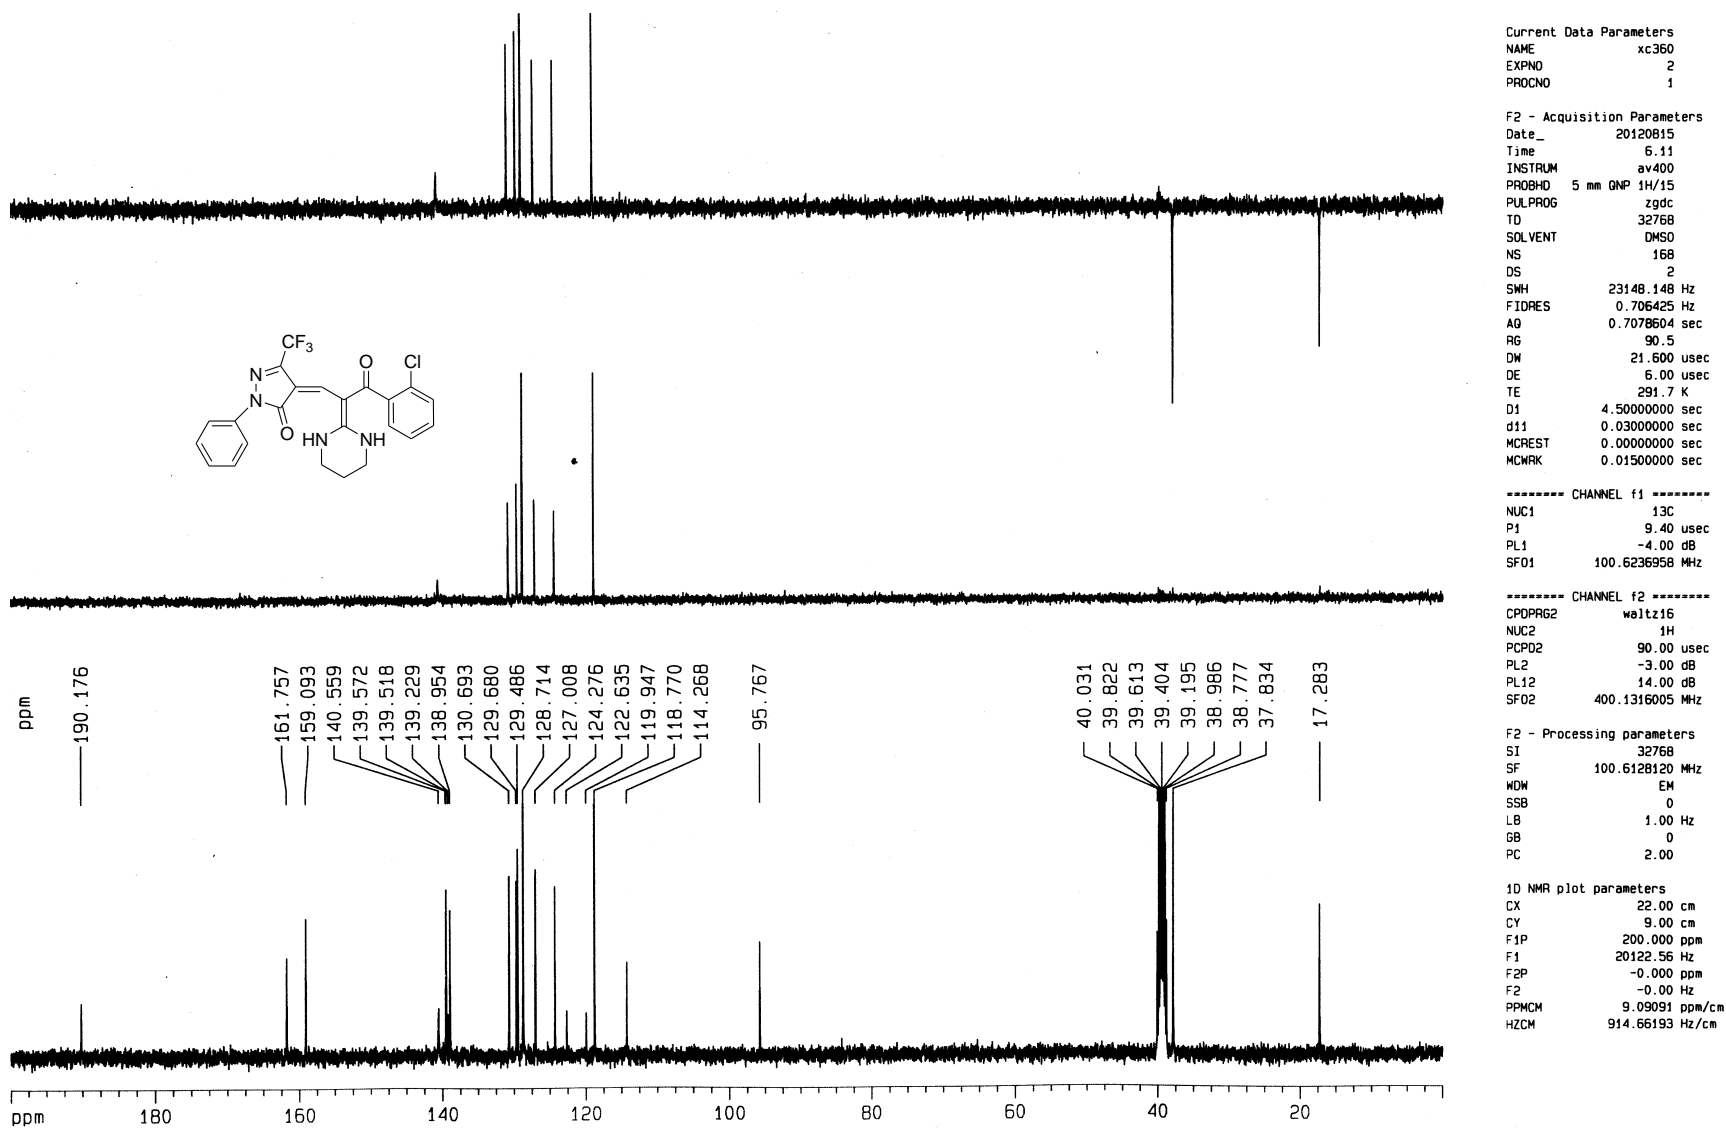

Figure 52. <sup>13</sup>C NMR (100 MHz, DMSO-*d*<sub>6</sub>) spectra of compound 71

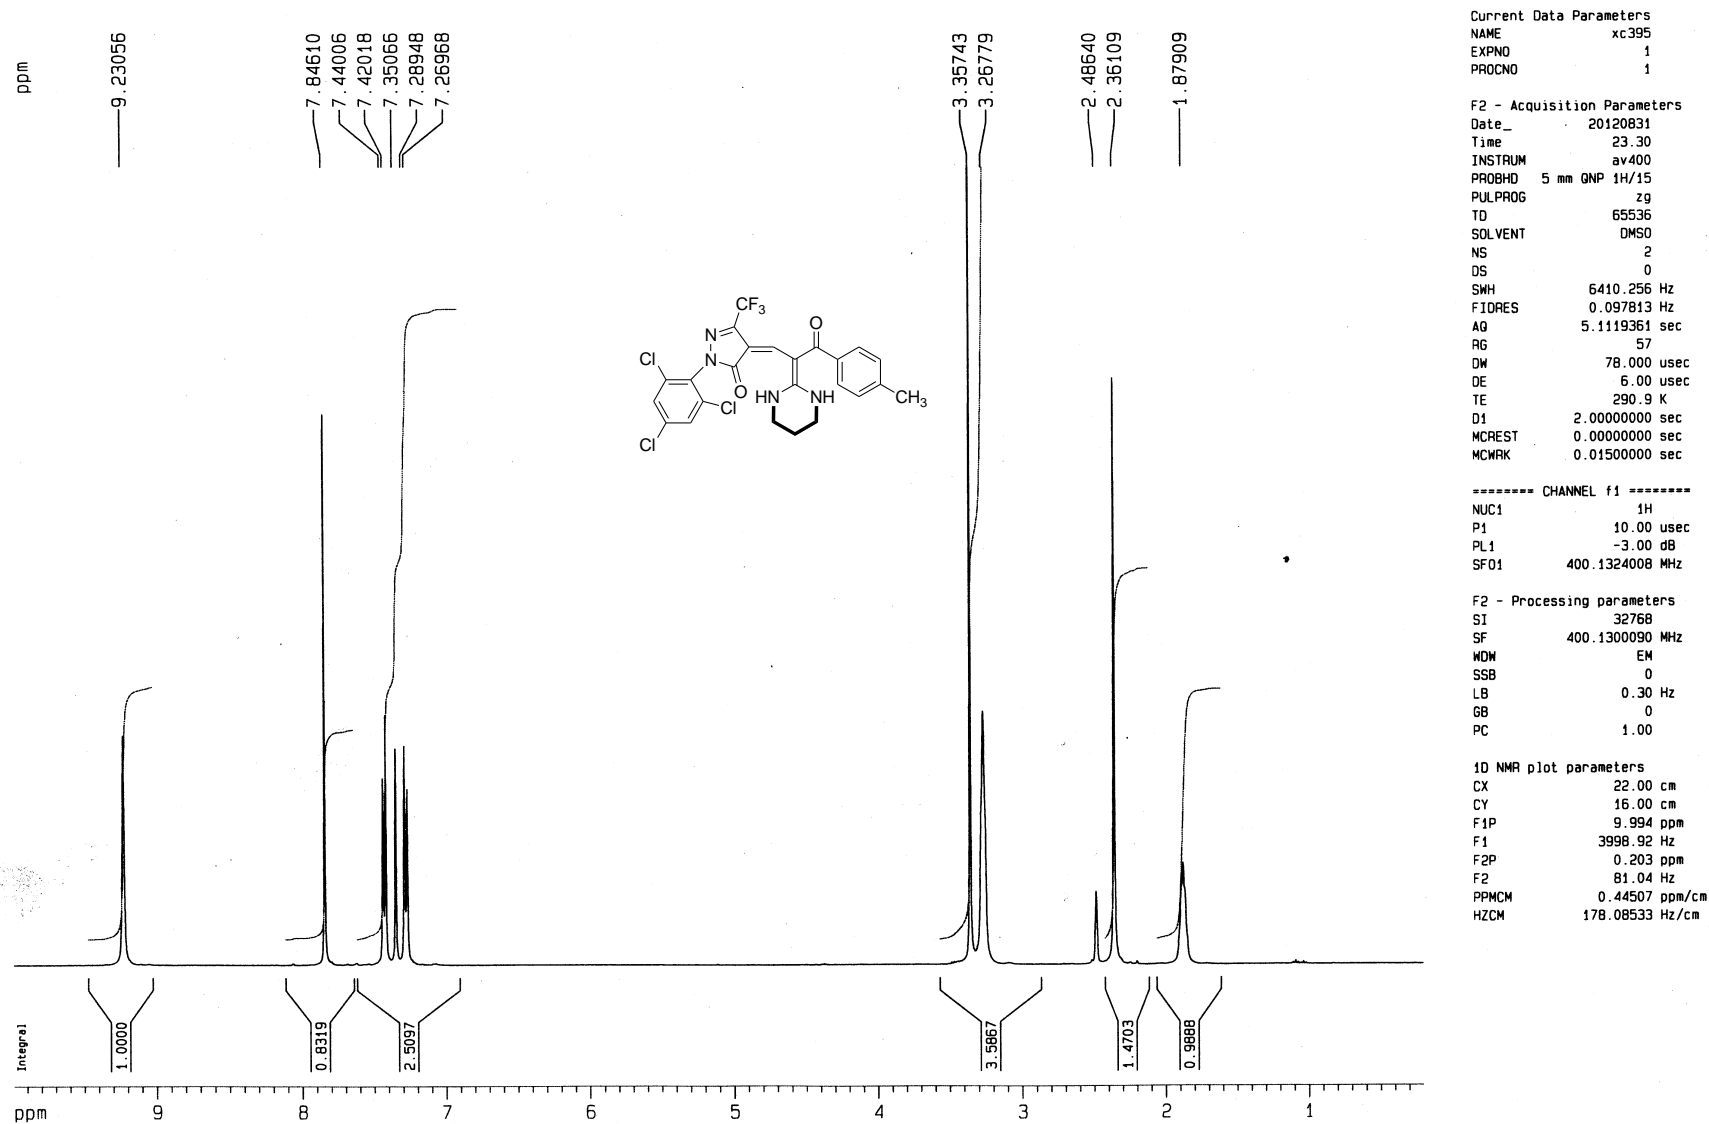

Figure 53. <sup>1</sup>H NMR (400 MHz, DMSO-*d*<sub>6</sub>) spectra of compound 7m

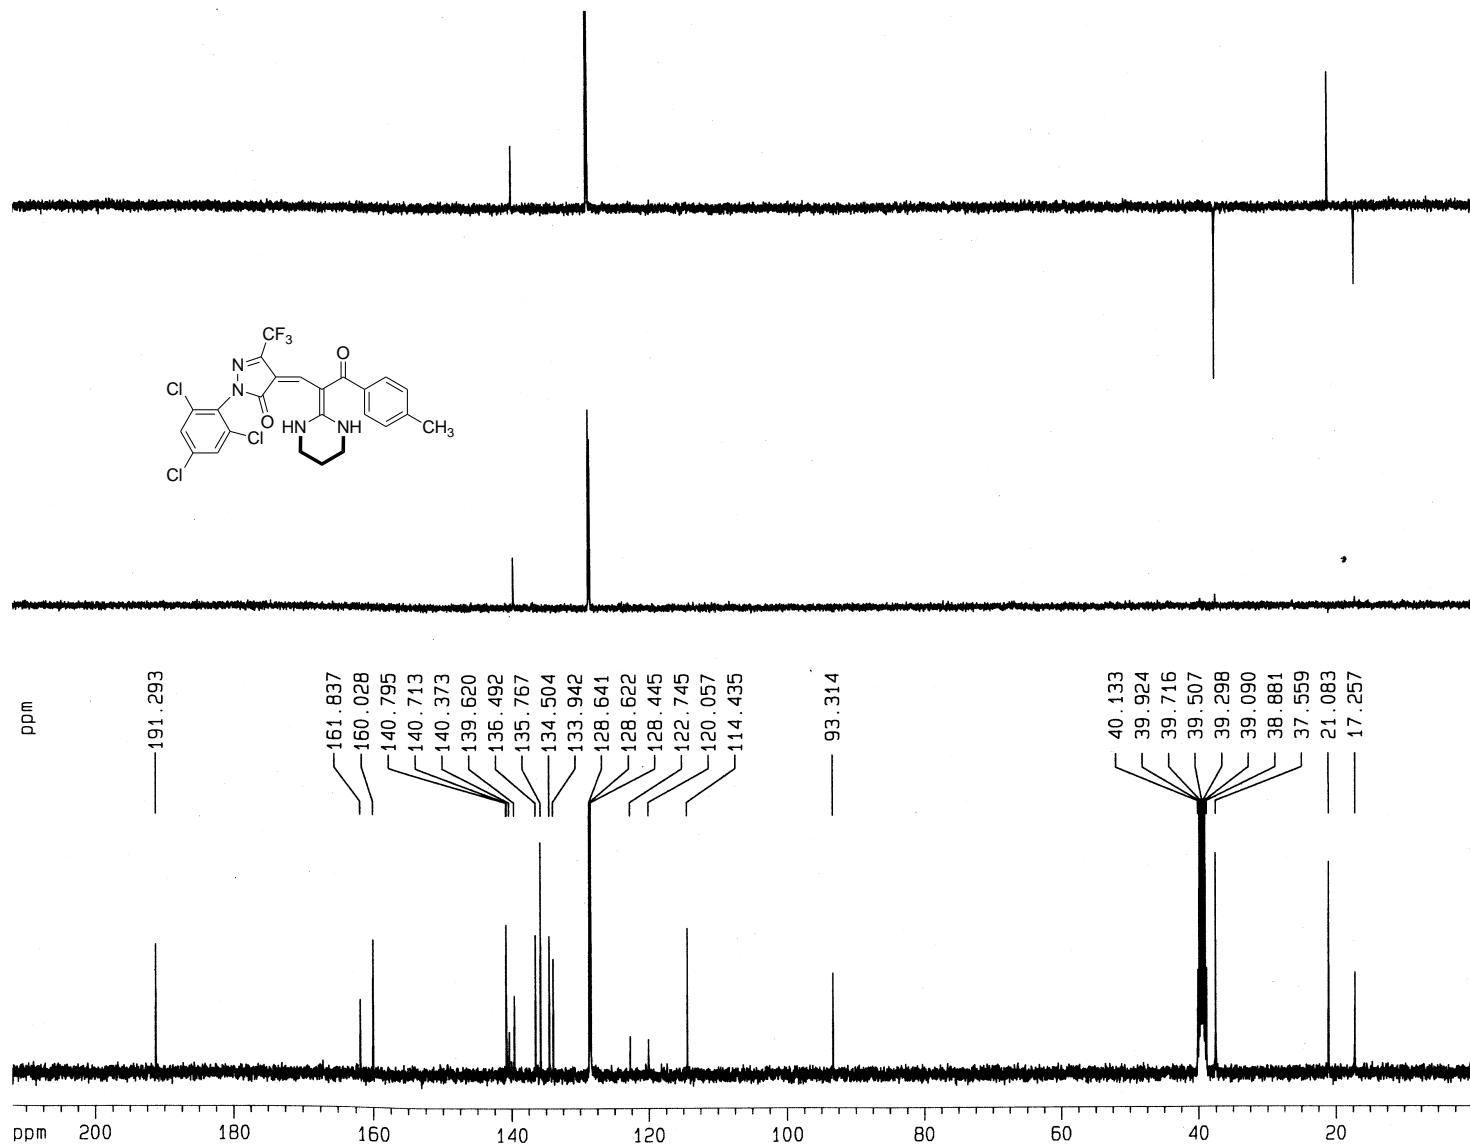

Current Data Parameters  
NAME xc395  
EXPNO 2  
PROCNO 1

F2 - Acquisition Parameters  
Date\_ 20120831  
Time 23.45  
INSTRUM av400  
PROBHD 5 mm QNP 1H/15  
PULPROG zgpg  
TD 32768  
SOLVENT DMSO  
NS 165  
DS 2  
SMH 23148.148 Hz  
FIDRES 0.706425 Hz  
AQ 0.7078604 sec  
RG 64  
DW 21.600 usec  
DE 6.00 usec  
TE 291.7 K  
D1 4.50000000 sec  
d11 0.03000000 sec  
MCREST 0.00000000 sec  
MCWRK 0.01500000 sec

----- CHANNEL f1 -----  
NUC1 13C  
P1 9.40 usec  
PL1 -4.00 dB  
SFO1 100.6236958 MHz

----- CHANNEL f2 -----  
CPDPRG2 waltz16  
NUC2 1H  
PCPD2 90.00 usec  
PL2 -3.00 dB  
PL12 14.00 dB  
SFO2 400.1316005 MHz

F2 - Processing parameters  
SI 32768  
SF 100.6128120 MHz  
WDW EM  
SSB 0  
LB 1.00 Hz  
GB 0  
PC 1.40

1D NMR plot parameters  
CX 22.00 cm  
CY 7.00 cm  
F1P 212.000 ppm  
F1 21329.92 Hz  
F2P 0.000 ppm  
F2 0.00 Hz  
PPMCM 9.63636 ppm/cm  
HZCM 969.54156 Hz/cm

Figure 54. <sup>13</sup>C NMR (100 MHz, DMSO-*d*<sub>6</sub>) spectra of compound 7m



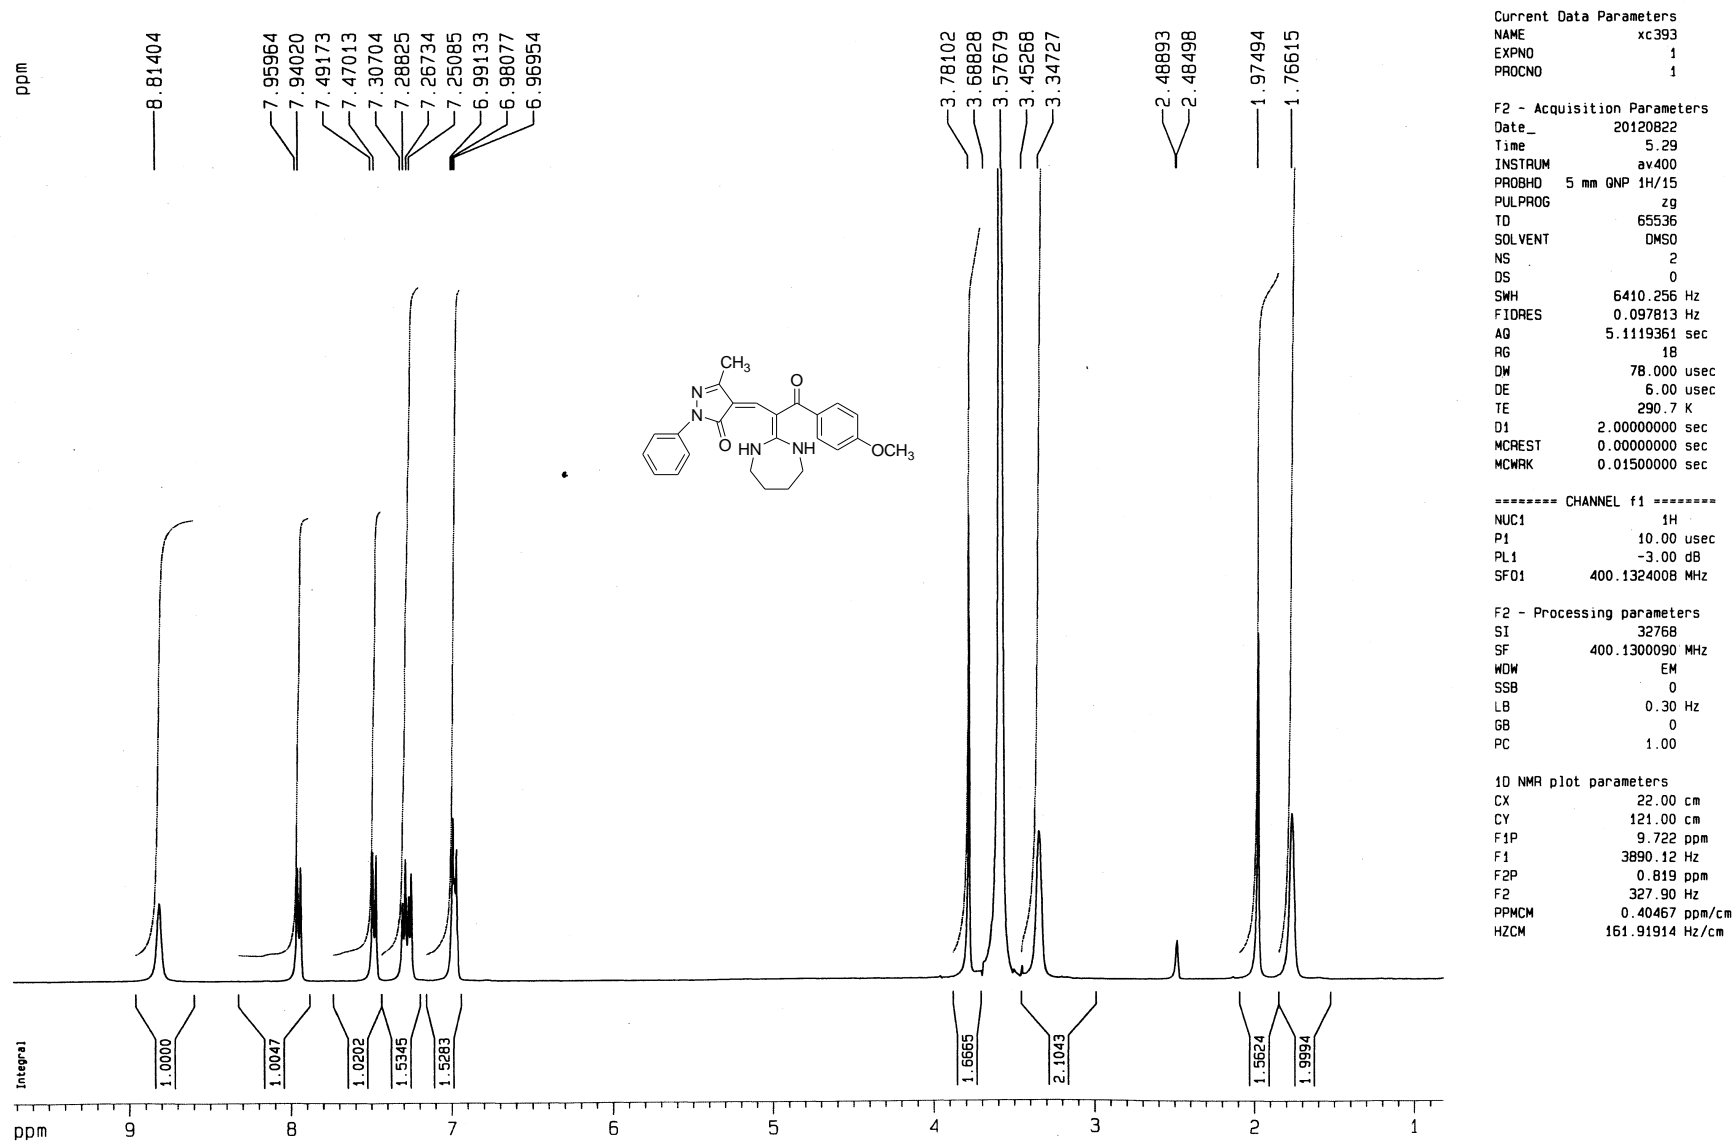

Figure 55. <sup>1</sup>H NMR (400 MHz, DMSO-*d*<sub>6</sub>) spectra of compound 8a

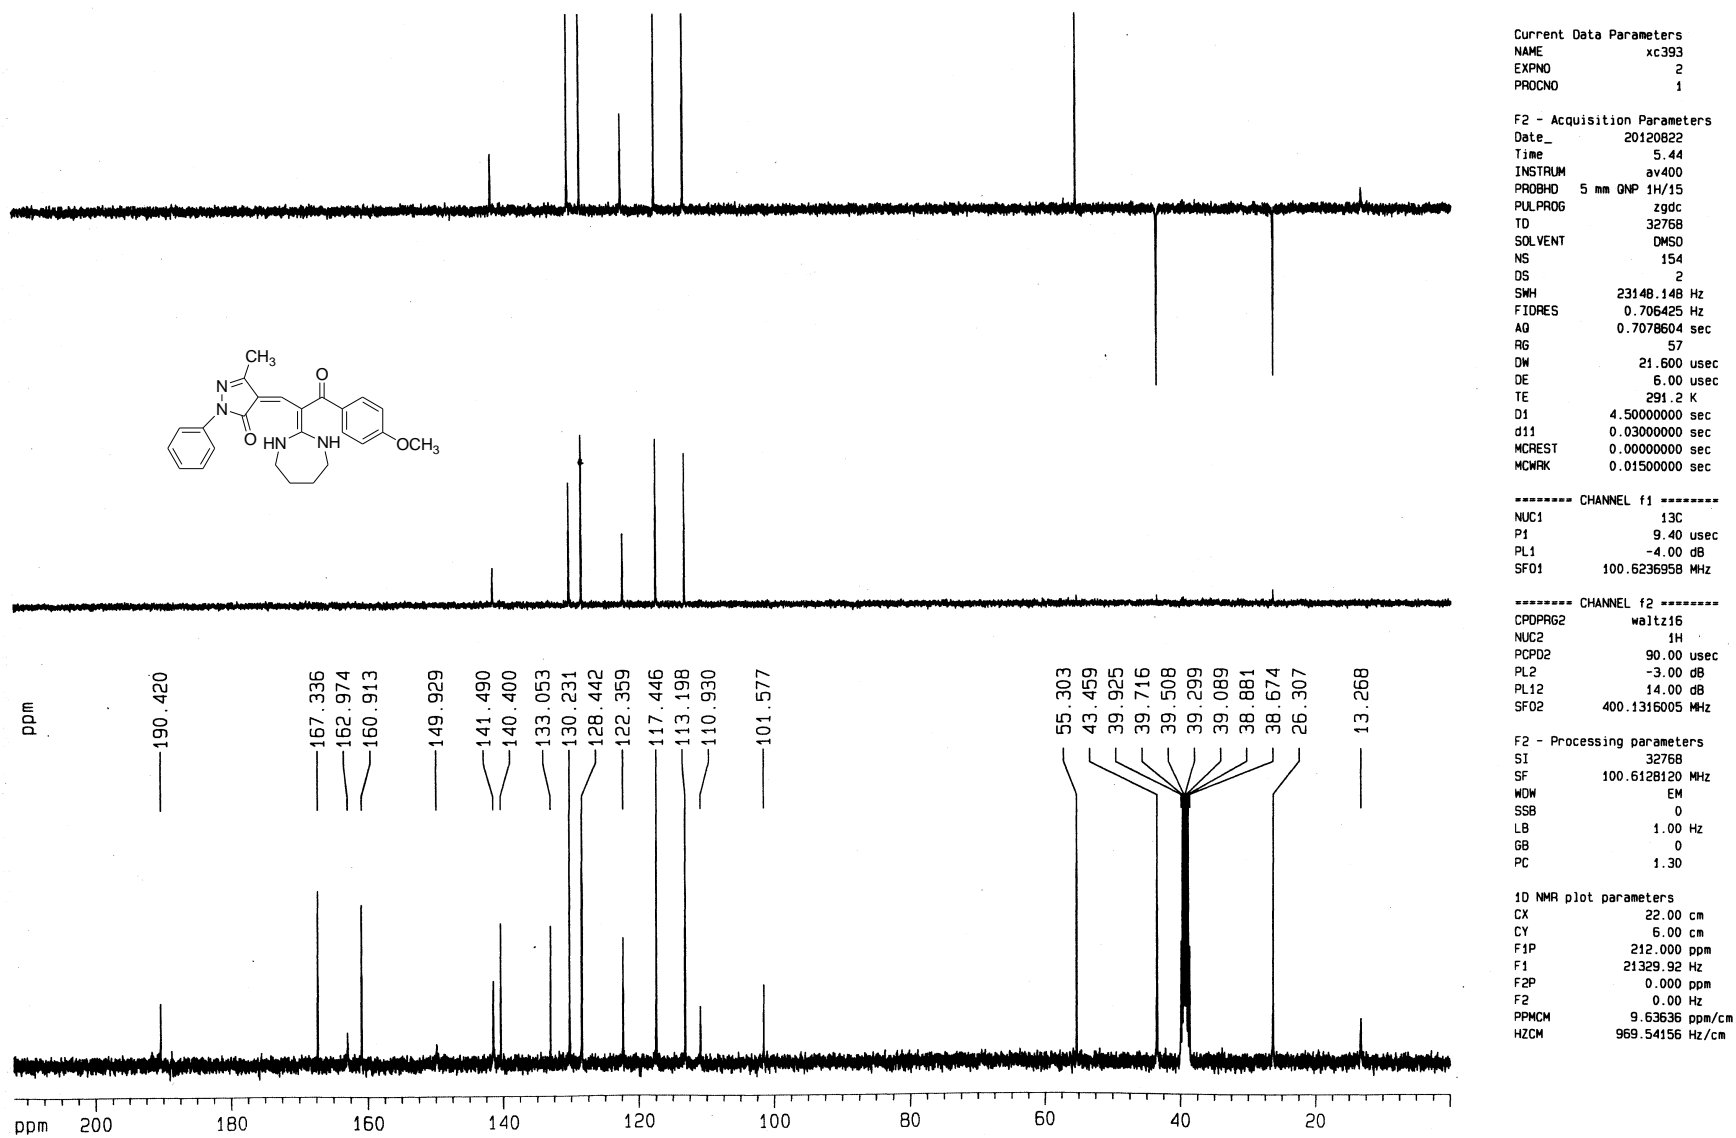

Figure 56.  $^{13}\text{C}$  NMR (100 MHz,  $\text{DMSO-}d_6$ ) spectra of compound 8a

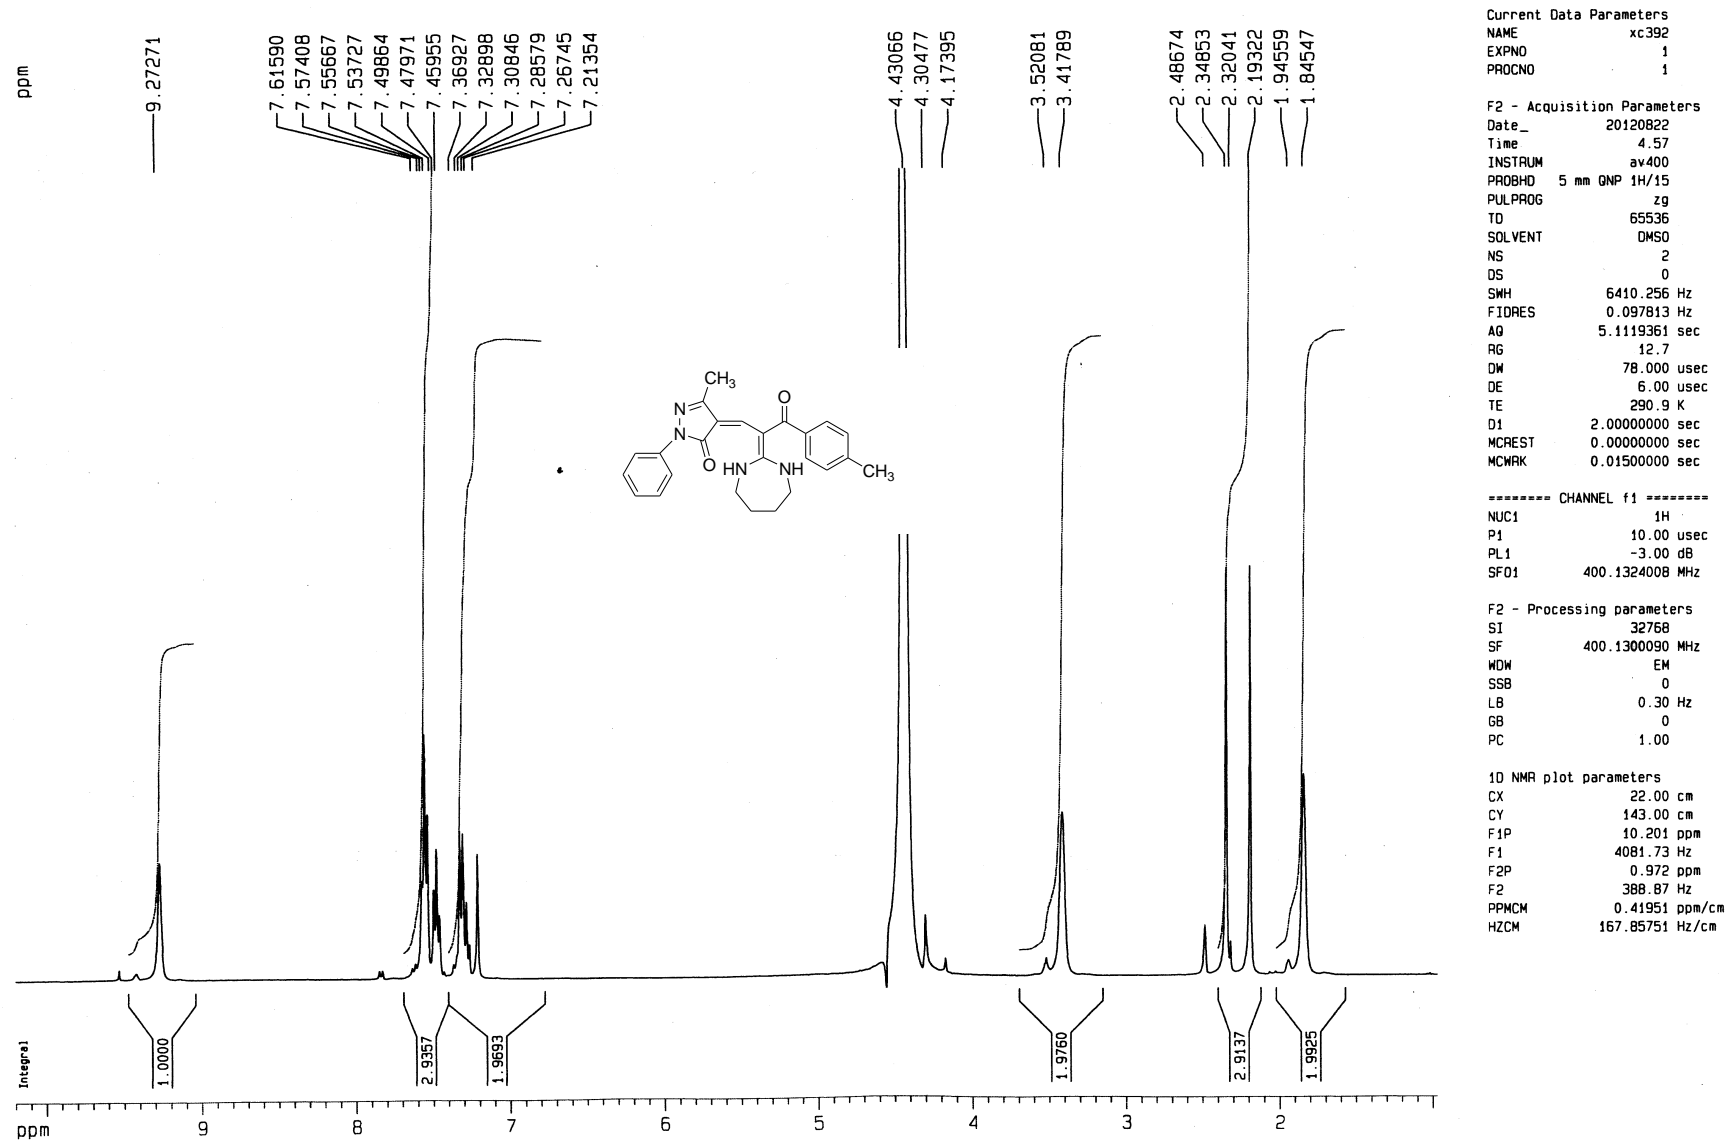

Figure 57. <sup>1</sup>H NMR (400 MHz, DMSO-*d*<sub>6</sub>) spectra of compound **8b**

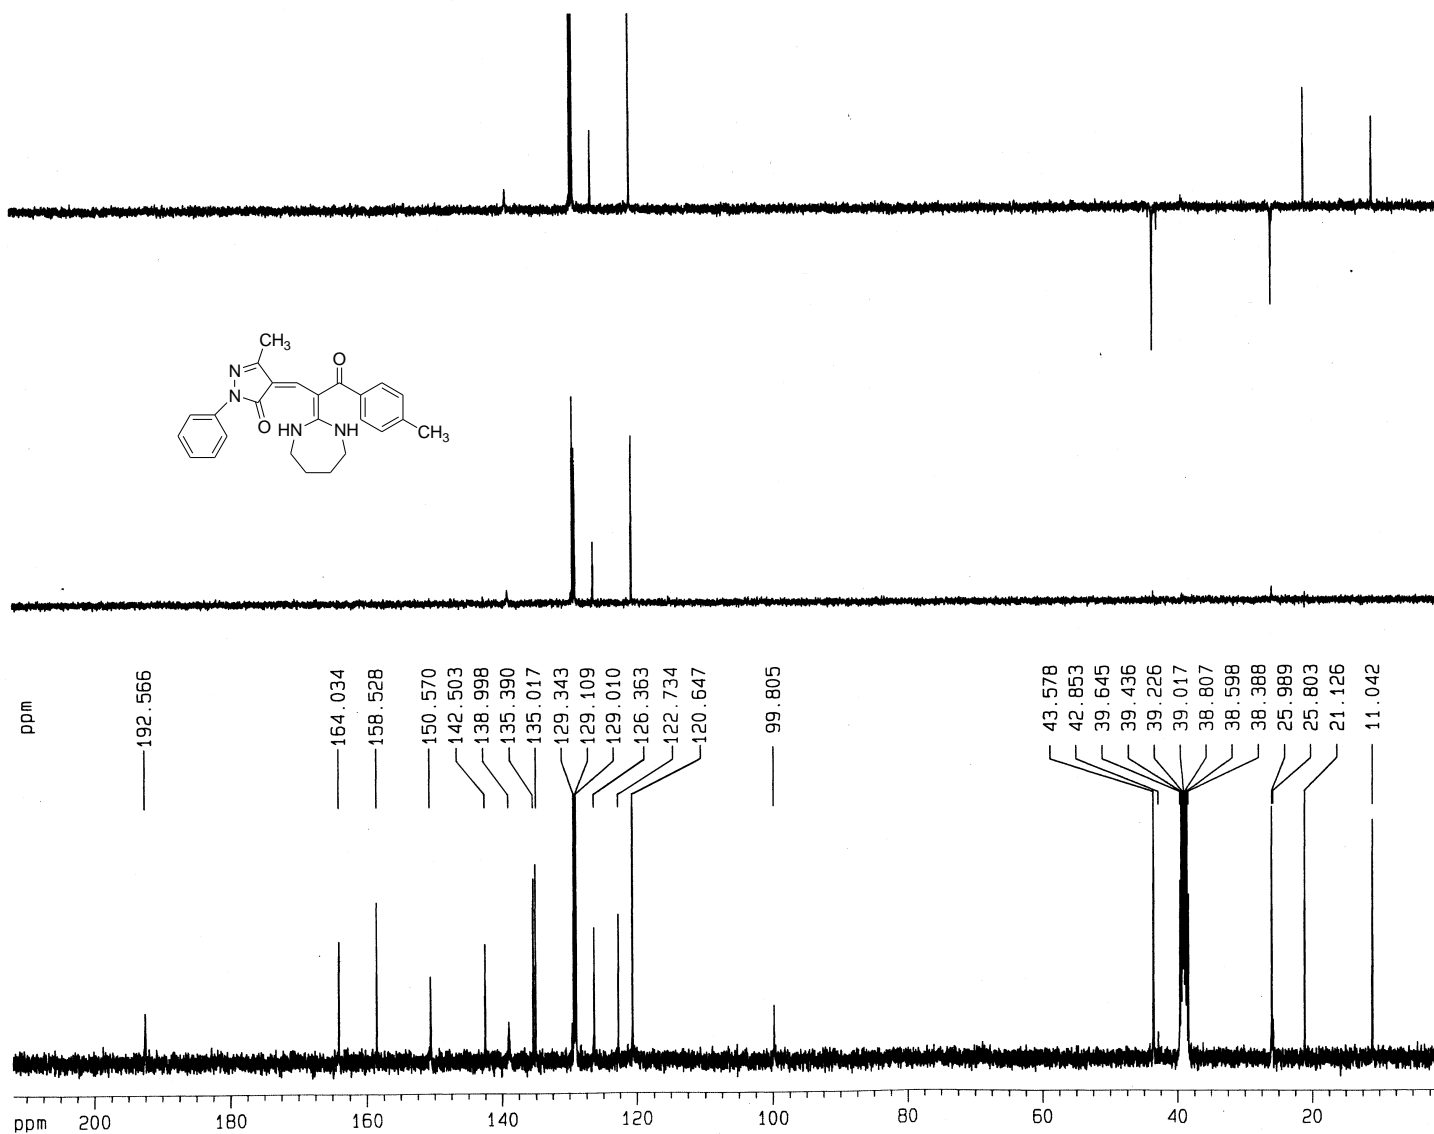

Current Data Parameters  
NAME xc392  
EXPNO 2  
PROCNO 1

F2 - Acquisition Parameters  
Date\_ 20120822  
Time 5.12  
INSTRUM av400  
PROBHD 5 mm GNP 1H/15  
PULPROG zgdc  
TD 32768  
SOLVENT DMSO  
NS 154  
DS 2  
SMH 23148.148 Hz  
FIDRES 0.705425 Hz  
AQ 0.7078504 sec  
RG 645.1  
DW 21.600 usec  
DE 6.00 usec  
TE 291.4 K  
D1 4.50000000 sec  
d11 0.03000000 sec  
MCREST 0.00000000 sec  
MCWRK 0.01500000 sec

----- CHANNEL f1 -----  
NUC1 13C  
P1 9.40 usec  
PL1 -4.00 dB  
SFO1 100.6236958 MHz

----- CHANNEL f2 -----  
CPDPRG2 waltz16  
NUC2 1H  
PCPD2 90.00 usec  
PL2 -3.00 dB  
PL12 14.00 dB  
SFO2 400.1316005 MHz

F2 - Processing parameters  
SI 32768  
SF 100.6128120 MHz  
WDW EM  
SSB 0  
LB 1.00 Hz  
GB 0  
PC 1.30

10 NMR plot parameters  
CX 22.00 cm  
CY 10.00 cm  
F1P 212.000 ppm  
F1 21329.92 Hz  
F2P 0.000 ppm  
F2 0.00 Hz  
PPMCM 9.63636 ppm/cm  
HZCM 969.54156 Hz/cm

Figure 58.  $^{13}\text{C}$  NMR (100 MHz,  $\text{DMSO-}d_6$ ) spectra of compound 8b

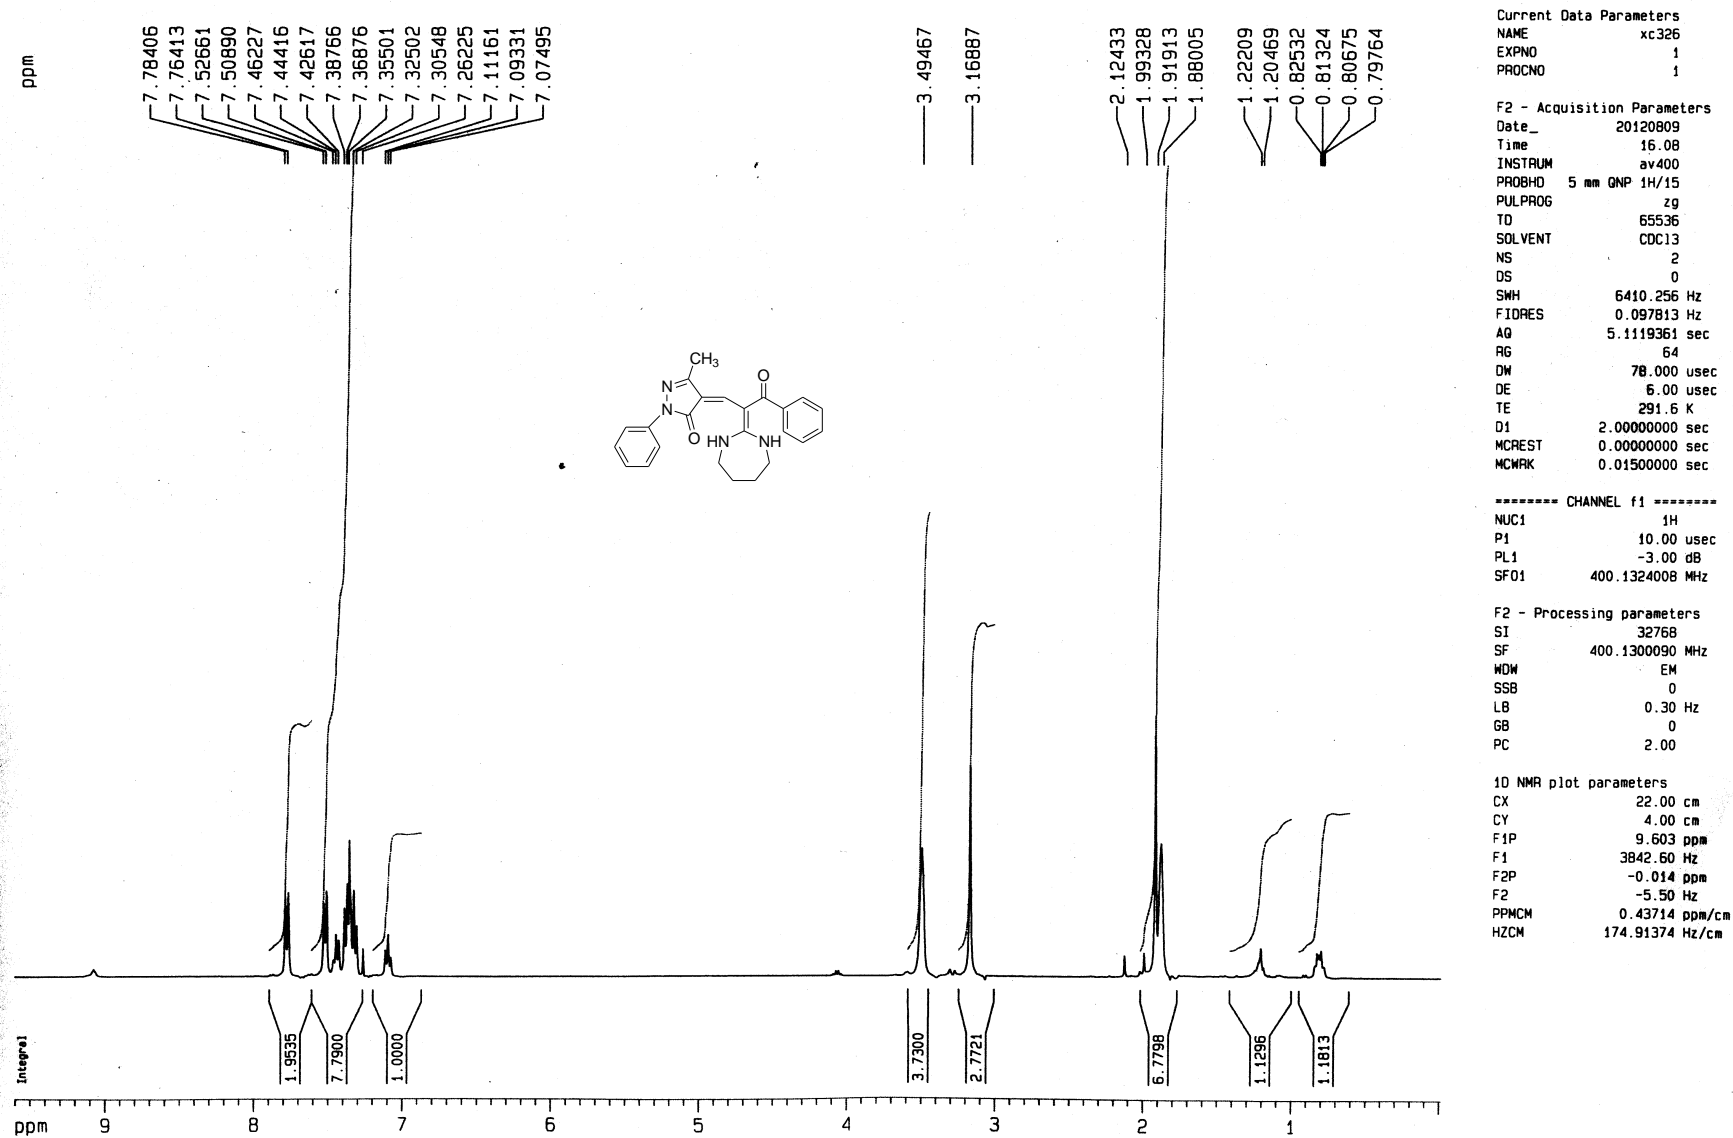

Figure S9. <sup>1</sup>H NMR (400 MHz, CDCl<sub>3</sub>) spectra of compound 8c

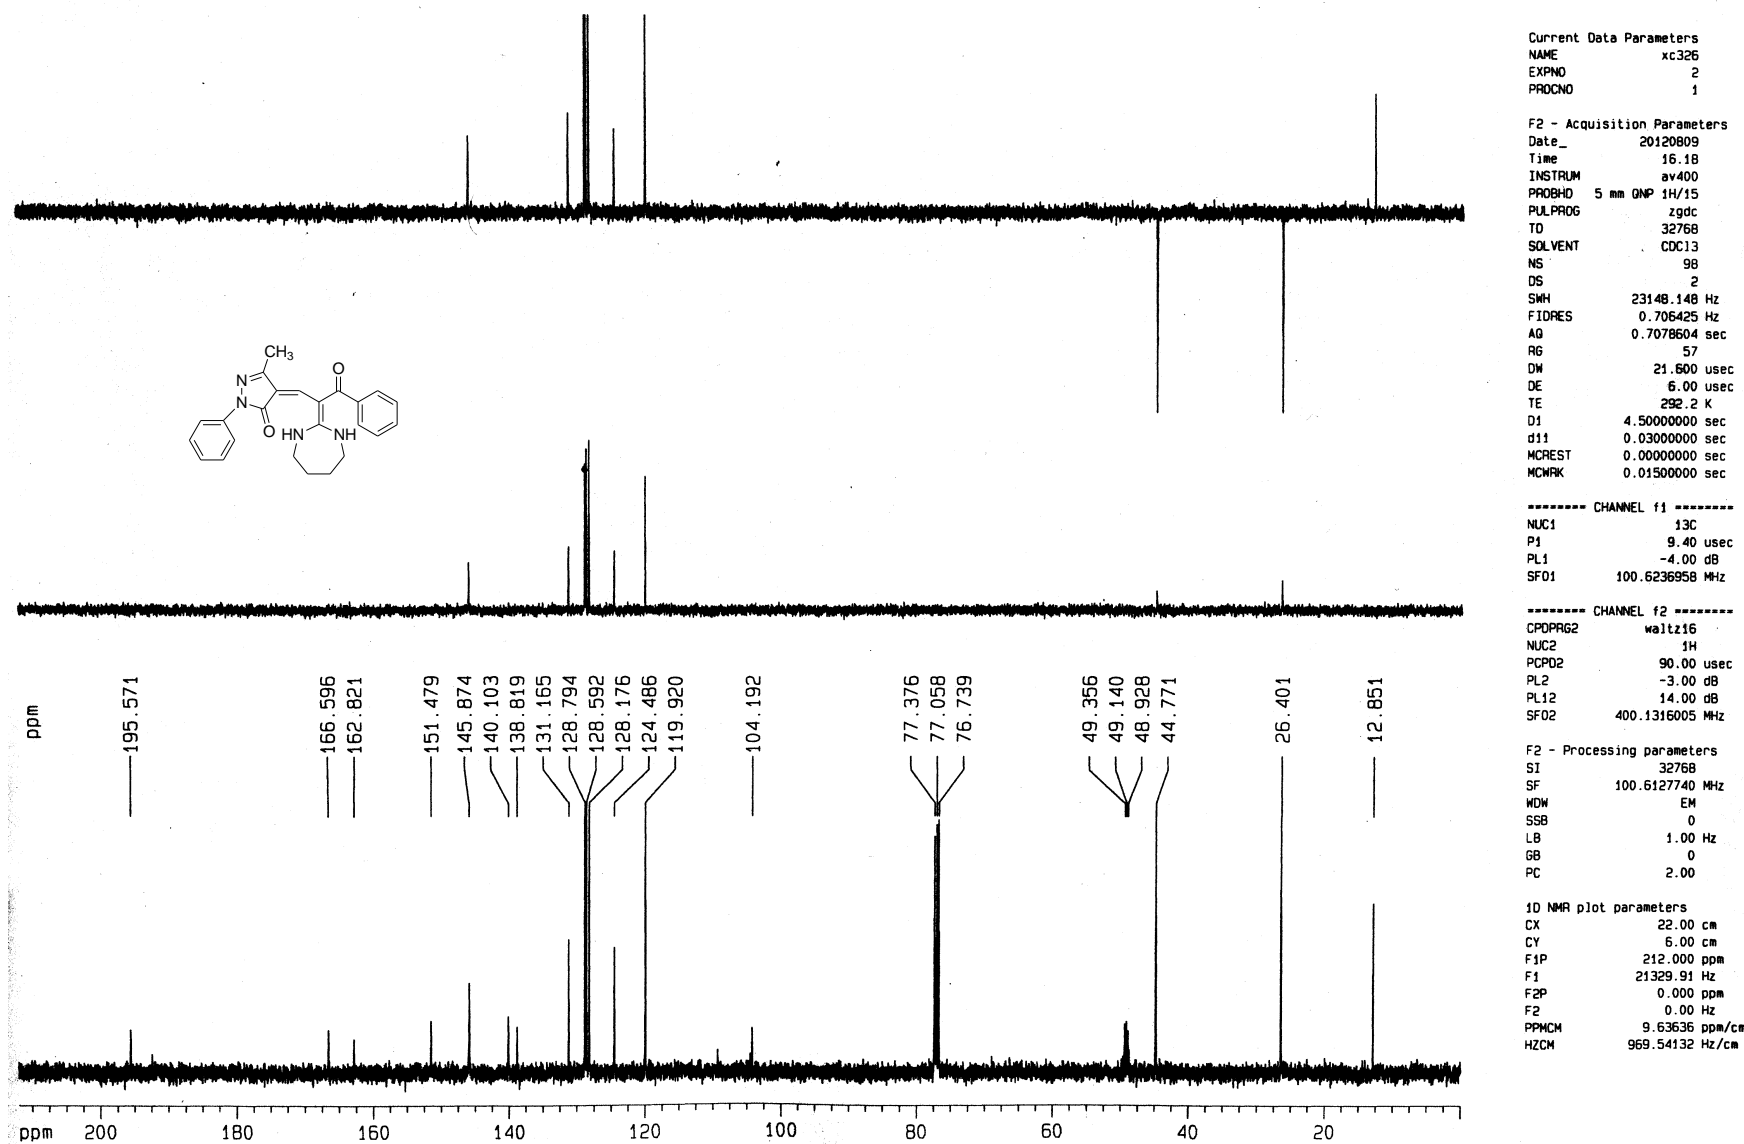

Figure 60.  $^{13}\text{C}$  NMR (100 MHz,  $\text{CDCl}_3$ ) spectra of compound 8c

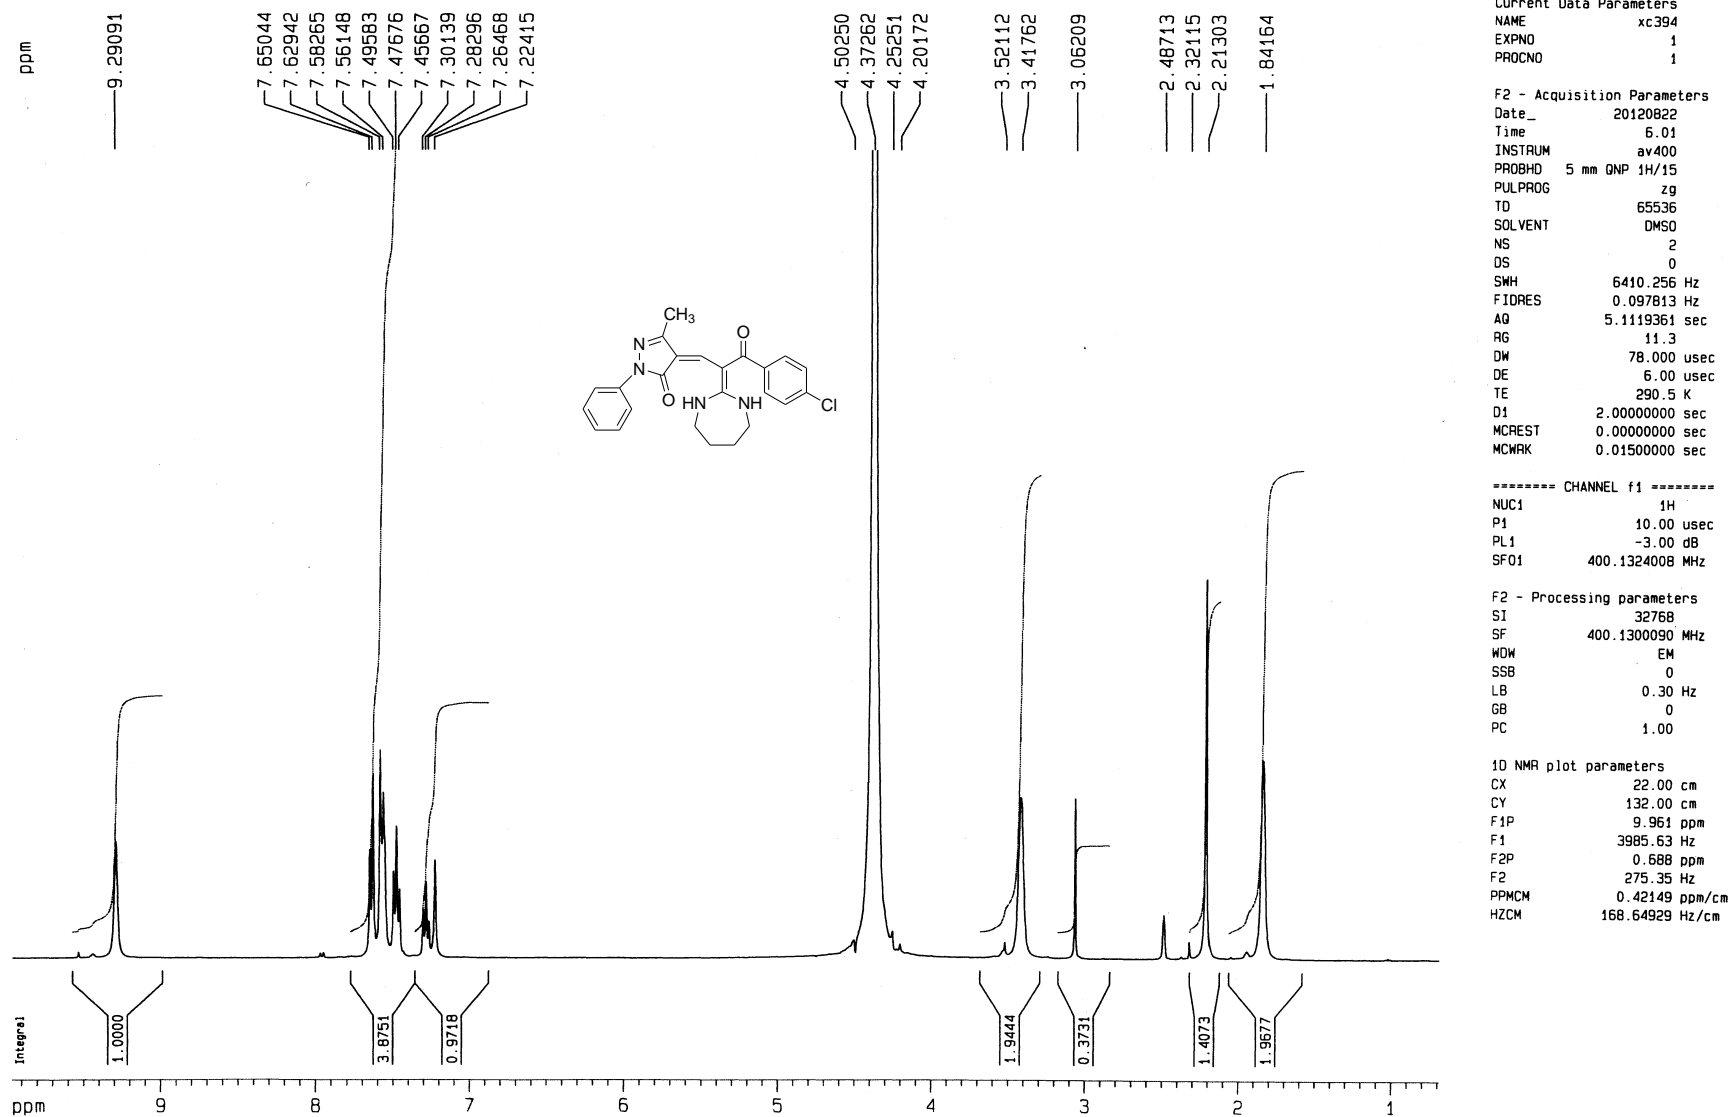

Figure 61. <sup>1</sup>H NMR (400 MHz, DMSO-*d*<sub>6</sub>) spectra of compound 8d

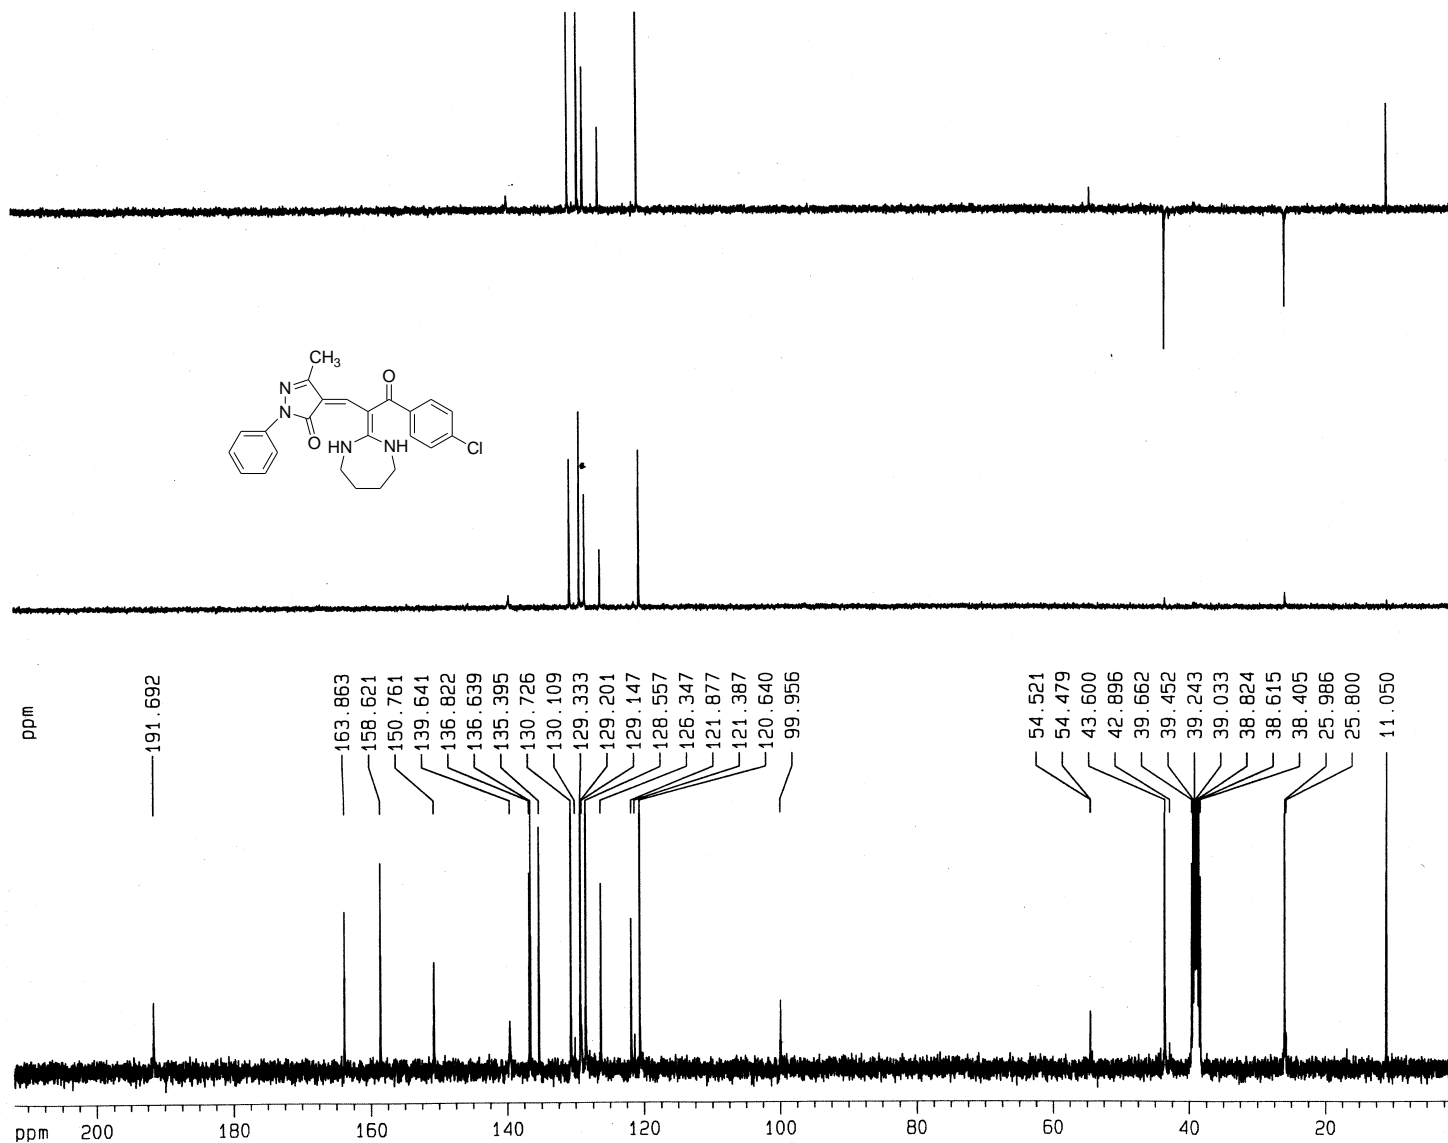

Current Data Parameters  
NAME xc394  
EXPNO 2  
PROCNO 1

F2 - Acquisition Parameters  
Date\_ 20120822  
Time 6.16  
INSTRUM av400  
PROBHD 5 mm QNP 1H/15  
PULPROG zgdc  
TD 32768  
SOLVENT DMSO  
NS 154  
DS 2  
SMH 23148.148 Hz  
FIDRES 0.706425 Hz  
AQ 0.7078604 sec  
RG 406.4  
DM 21.600 usec  
DE 6.00 usec  
TE 291.0 K  
D1 4.50000000 sec  
d11 0.03000000 sec  
MCREST 0.00000000 sec  
MCMRK 0.01500000 sec

----- CHANNEL f1 -----  
NUC1 13C  
P1 9.40 usec  
PL1 -4.00 dB  
SF01 100.6236958 MHz

----- CHANNEL f2 -----  
CPDPRG2 waltz16  
NUC2 1H  
PCPD2 90.00 usec  
PL2 -3.00 dB  
PL12 14.00 dB  
SF02 400.1316005 MHz

F2 - Processing parameters  
SI 32768  
SF 100.6128120 MHz  
WDW EM  
SSB 0  
LB 1.00 Hz  
GB 0  
PC 1.30

1D NMR plot parameters  
CX 22.00 cm  
CY 13.00 cm  
F1P 212.000 ppm  
F1 21329.92 Hz  
F2P 0.000 ppm  
F2 0.00 Hz  
PPMCM 9.63636 ppm/cm  
HZCM 969.54156 Hz/cm

Figure 62.  $^{13}\text{C}$  NMR (100 MHz,  $\text{DMSO-}d_6$ ) spectra of compound 8d



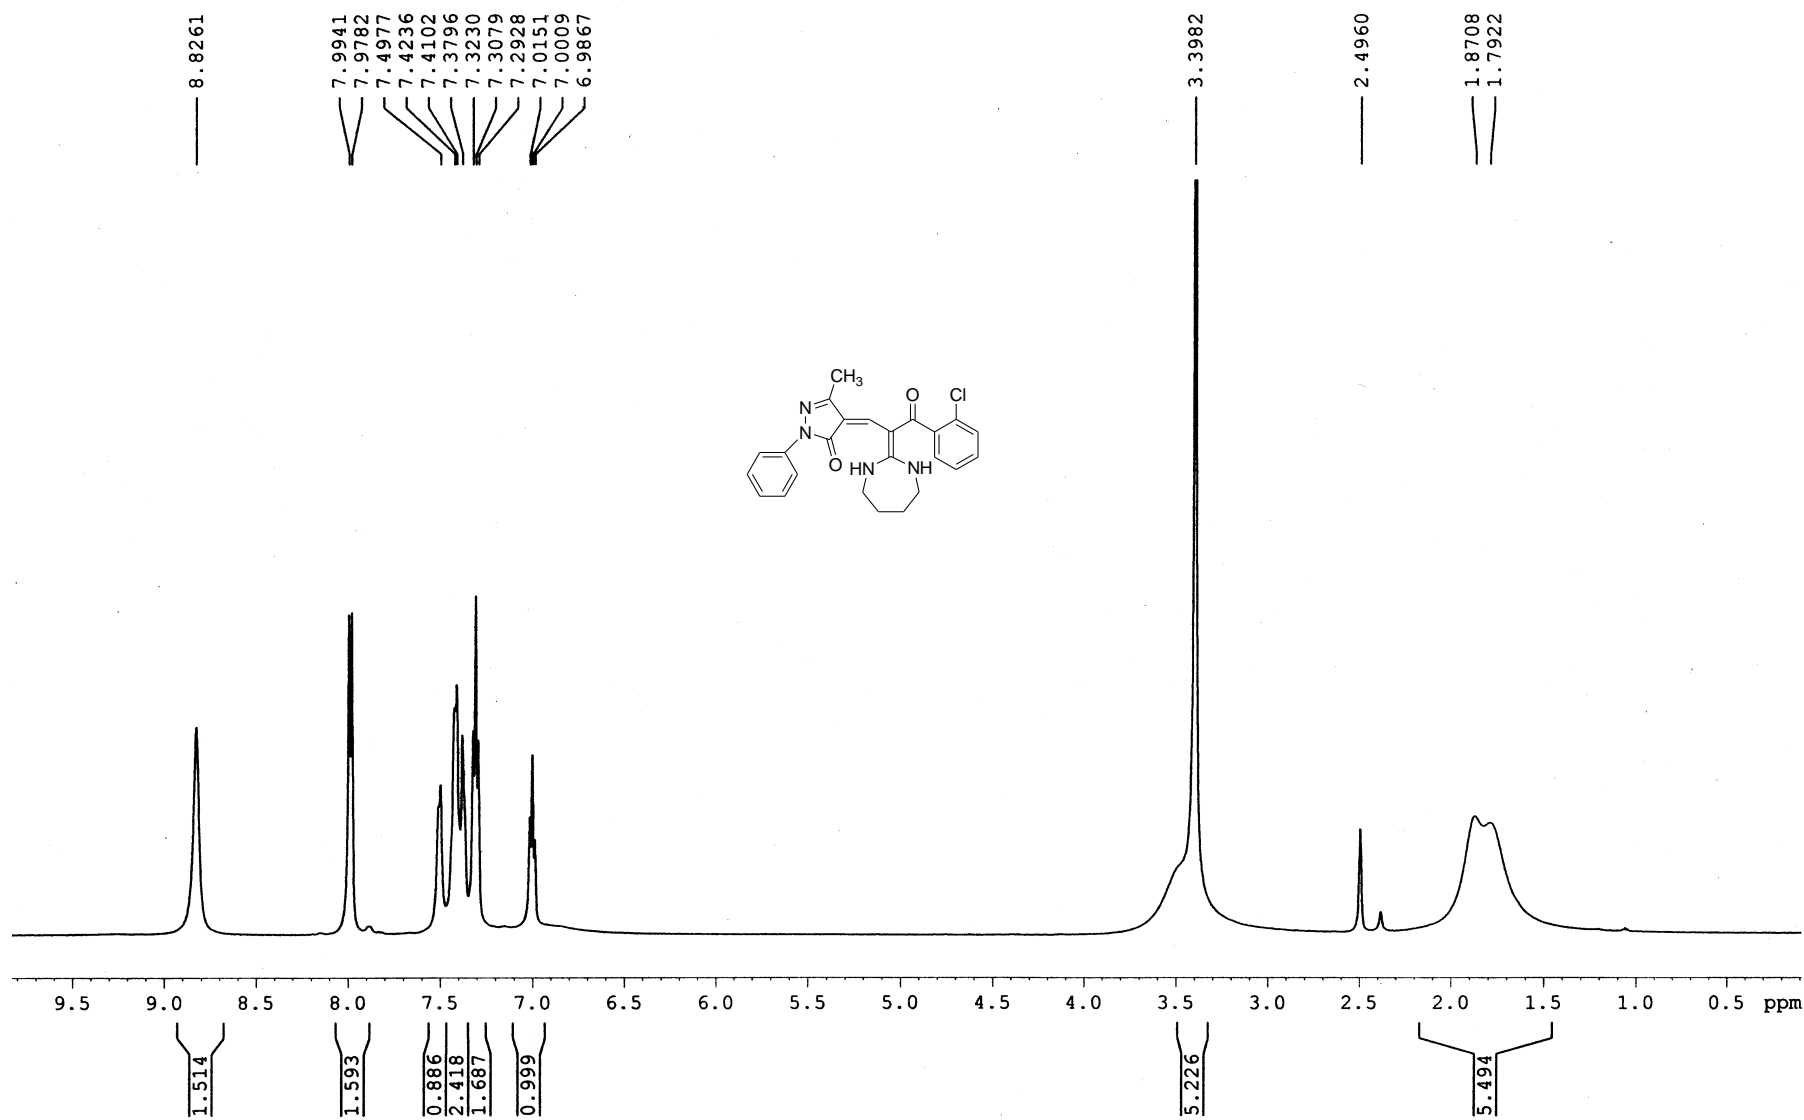

Figure 63.  $^1\text{H NMR}$  (500 MHz,  $\text{DMSO-}d_6$ ) spectra of compound **8e**

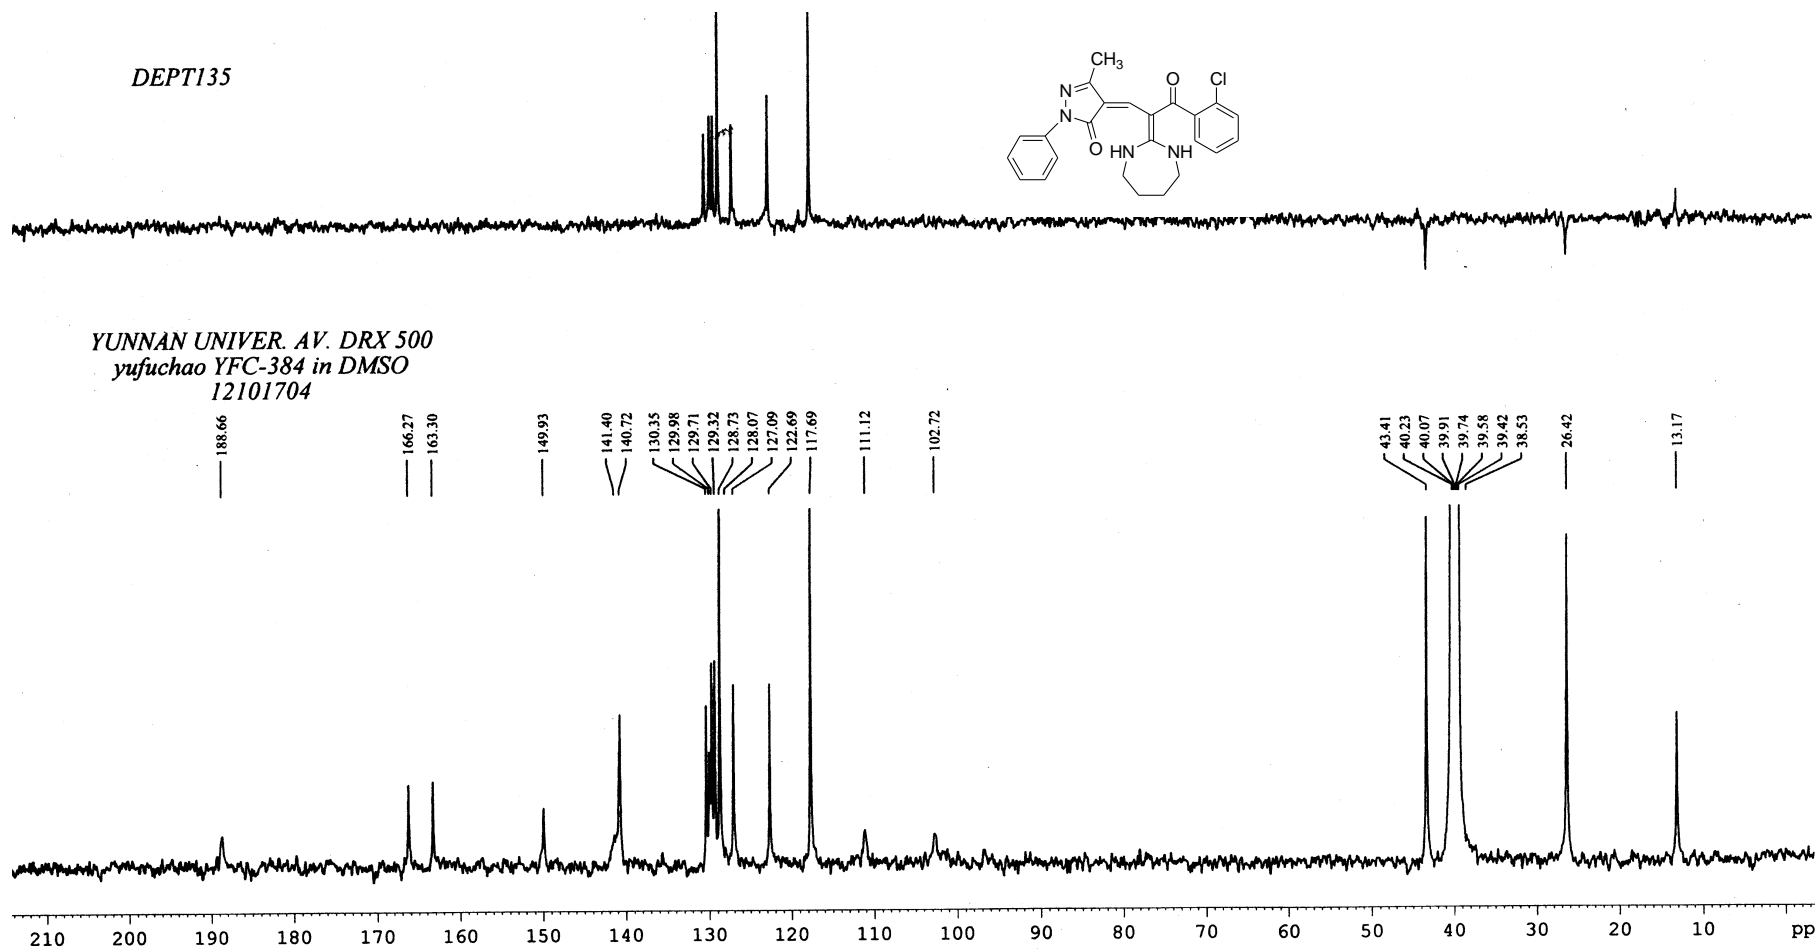

Figure 64.  $^{13}\text{C}$  NMR (125 MHz,  $\text{DMSO-}d_6$ ) spectra of compound **8e**

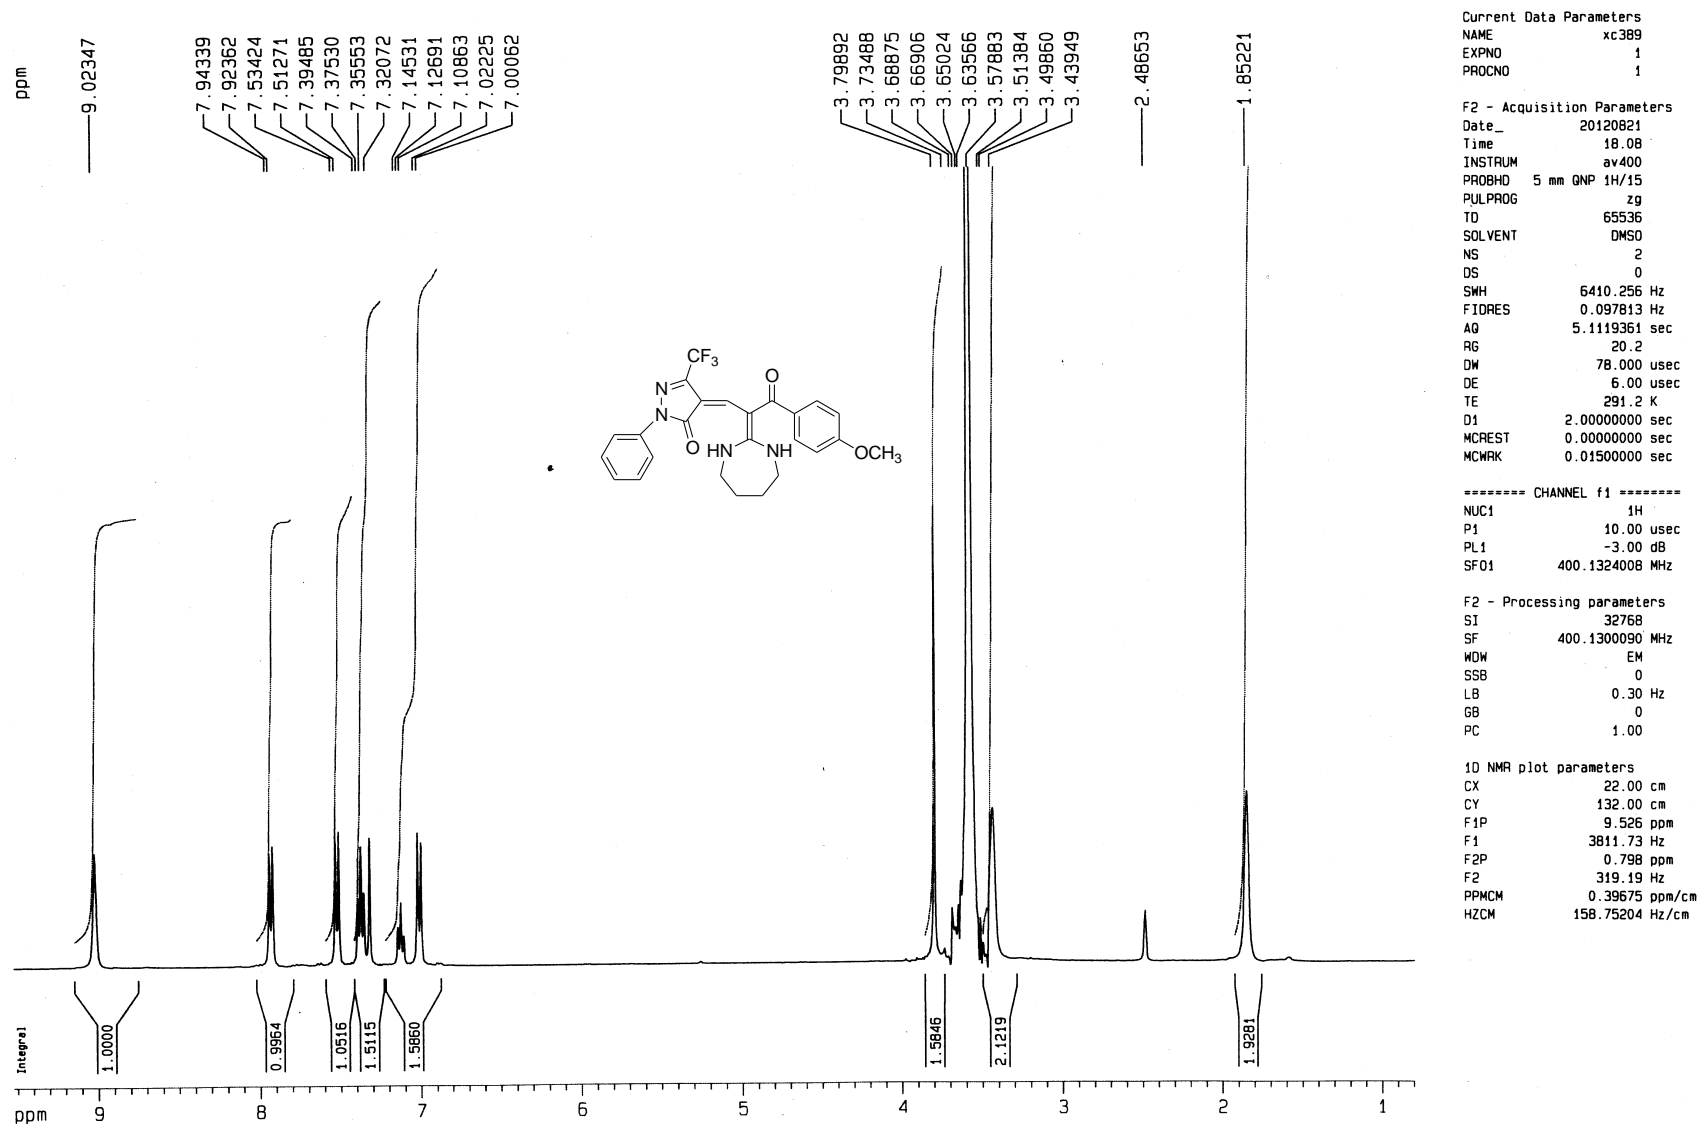

Figure 65. <sup>1</sup>H NMR (400 MHz, DMSO-*d*<sub>6</sub>) spectra of compound **8f**

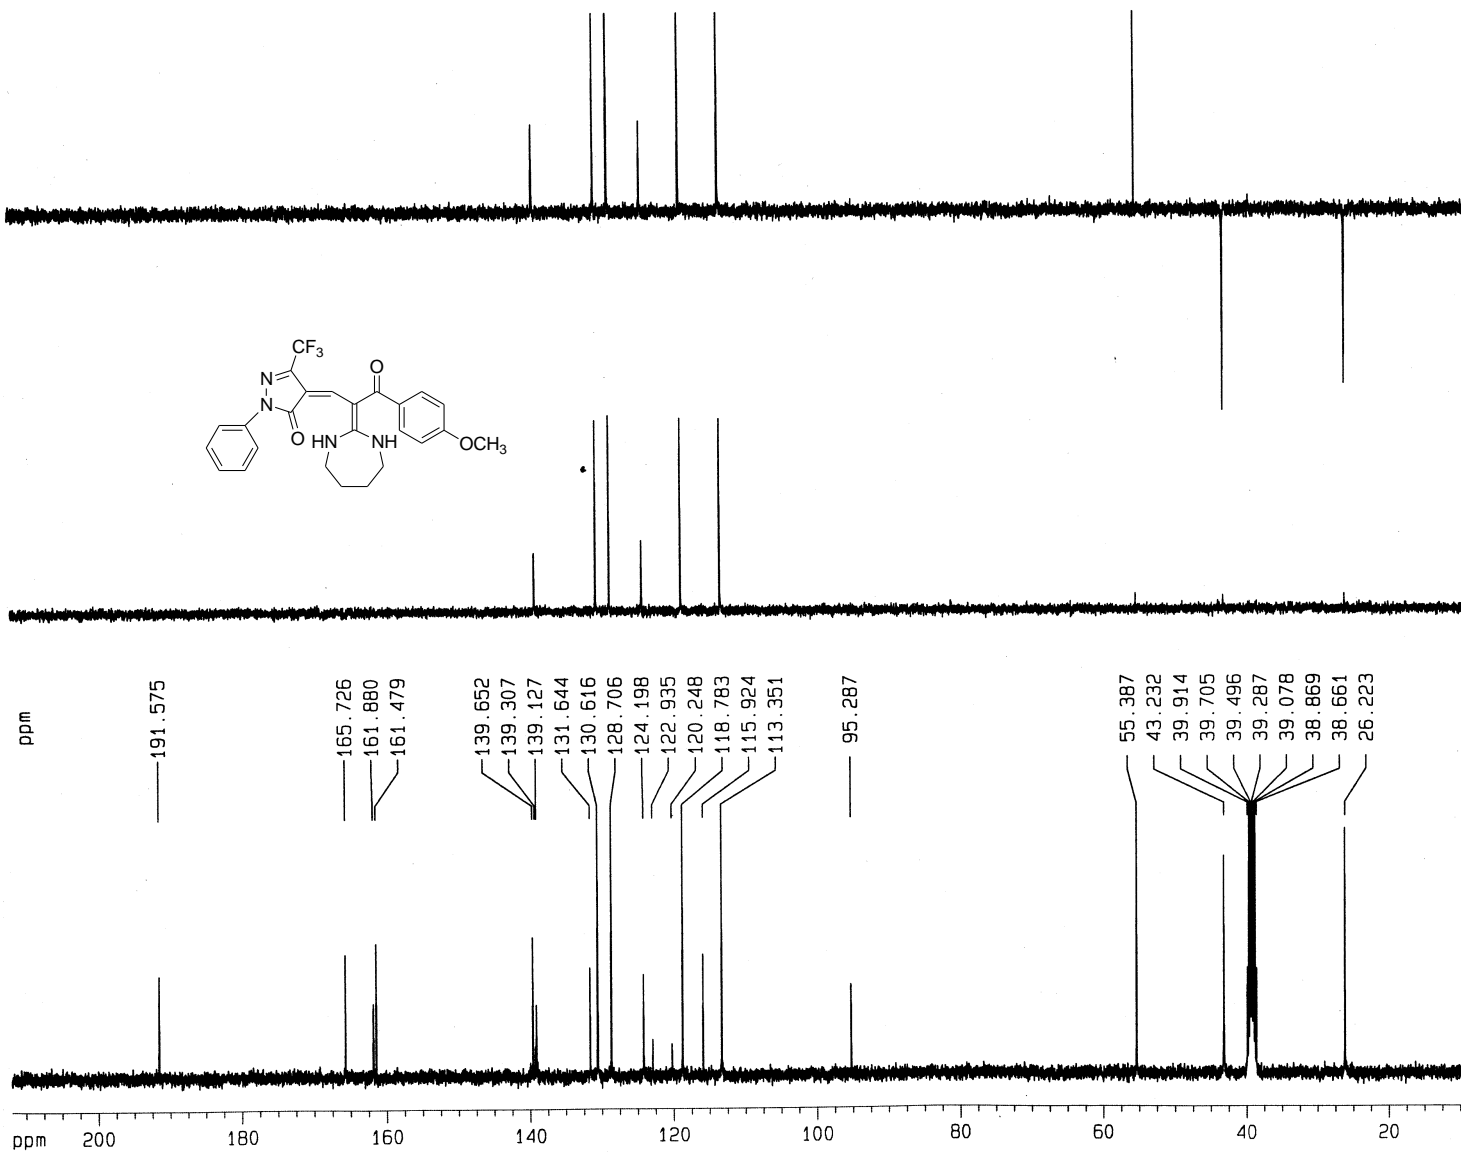

```

Current Data Parameters
NAME          xc389
EXPNO         2
PROCNO        1

F2 - Acquisition Parameters
Date_         20120821
Time          18.10
INSTRUM       av400
PROBHD        5 mm QNP 1H/15
PULPROG       zgdc
TD            32768
SOLVENT       DMSO
NS            148
DS            2
SWH           23148.148 Hz
FIDRES        0.706425 Hz
AQ            0.7078604 sec
RG            114
DM            21.600 usec
DE            6.00 usec
TE            291.4 K
D1            4.50000000 sec
d11           0.03000000 sec
MCREST        0.00000000 sec
MCMRK         0.01500000 sec

----- CHANNEL f1 -----
NUC1           13C
P1             9.40 usec
PL1            -4.00 dB
SF01          100.6236958 MHz

----- CHANNEL f2 -----
CPDPRG2       wa1tz16
NUC2           1H
PCPD2         90.00 usec
PL2            -3.00 dB
PL12          14.00 dB
SF02          400.1316005 MHz

F2 - Processing parameters
SI            32768
SF            100.6128120 MHz
WDM           EM
SSB           0
LB            1.00 Hz
GB            0
PC            2.00

1D NMR plot parameters
CX            22.00 cm
CY            5.00 cm
F1P           212.000 ppm
F1            21329.92 Hz
F2P           9.000 ppm
F2            905.52 Hz
PPMCM         9.22727 ppm/cm
HZCM          928.38177 Hz/cm
    
```

Figure 66. <sup>13</sup>C NMR (100 MHz, DMSO-*d*<sub>6</sub>) spectra of compound 8f

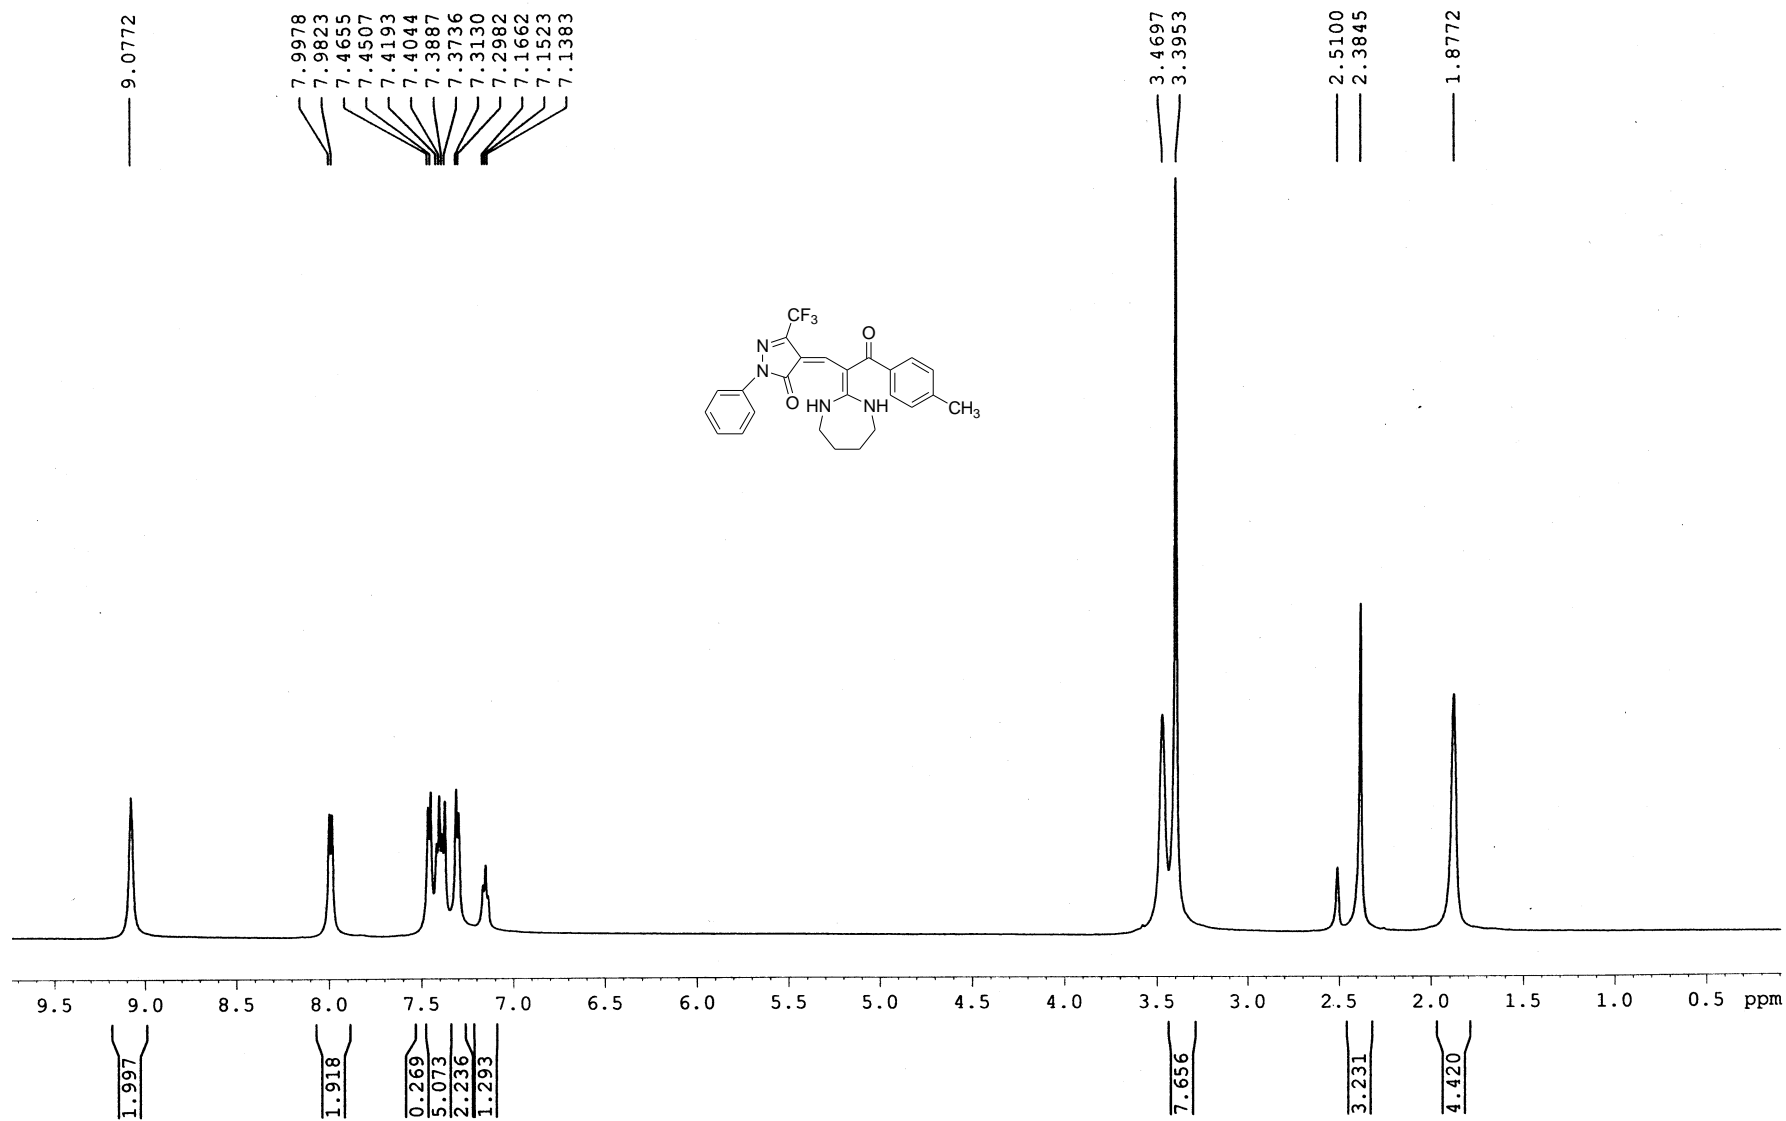

Figure 67.  $^1\text{H}$  NMR (500 MHz,  $\text{DMSO-}d_6$ ) spectra of compound **8g**

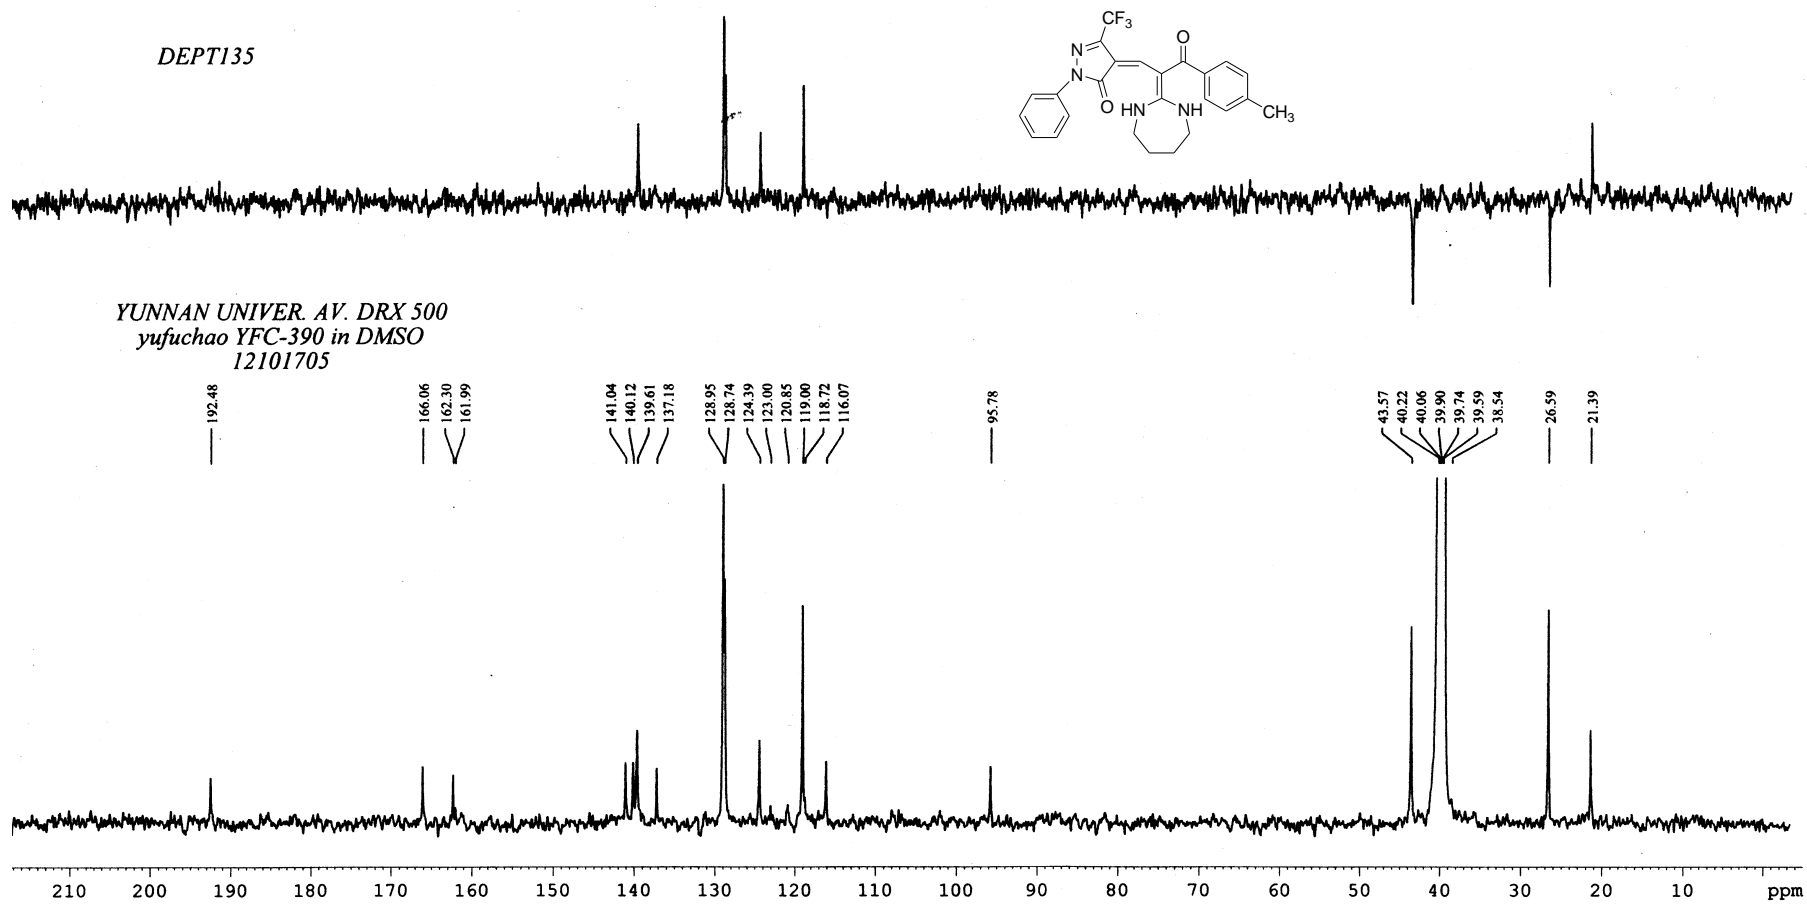

Figure 68.  $^{13}\text{C}$  NMR (125 MHz,  $\text{DMSO}-d_6$ ) spectra of compound **8g**

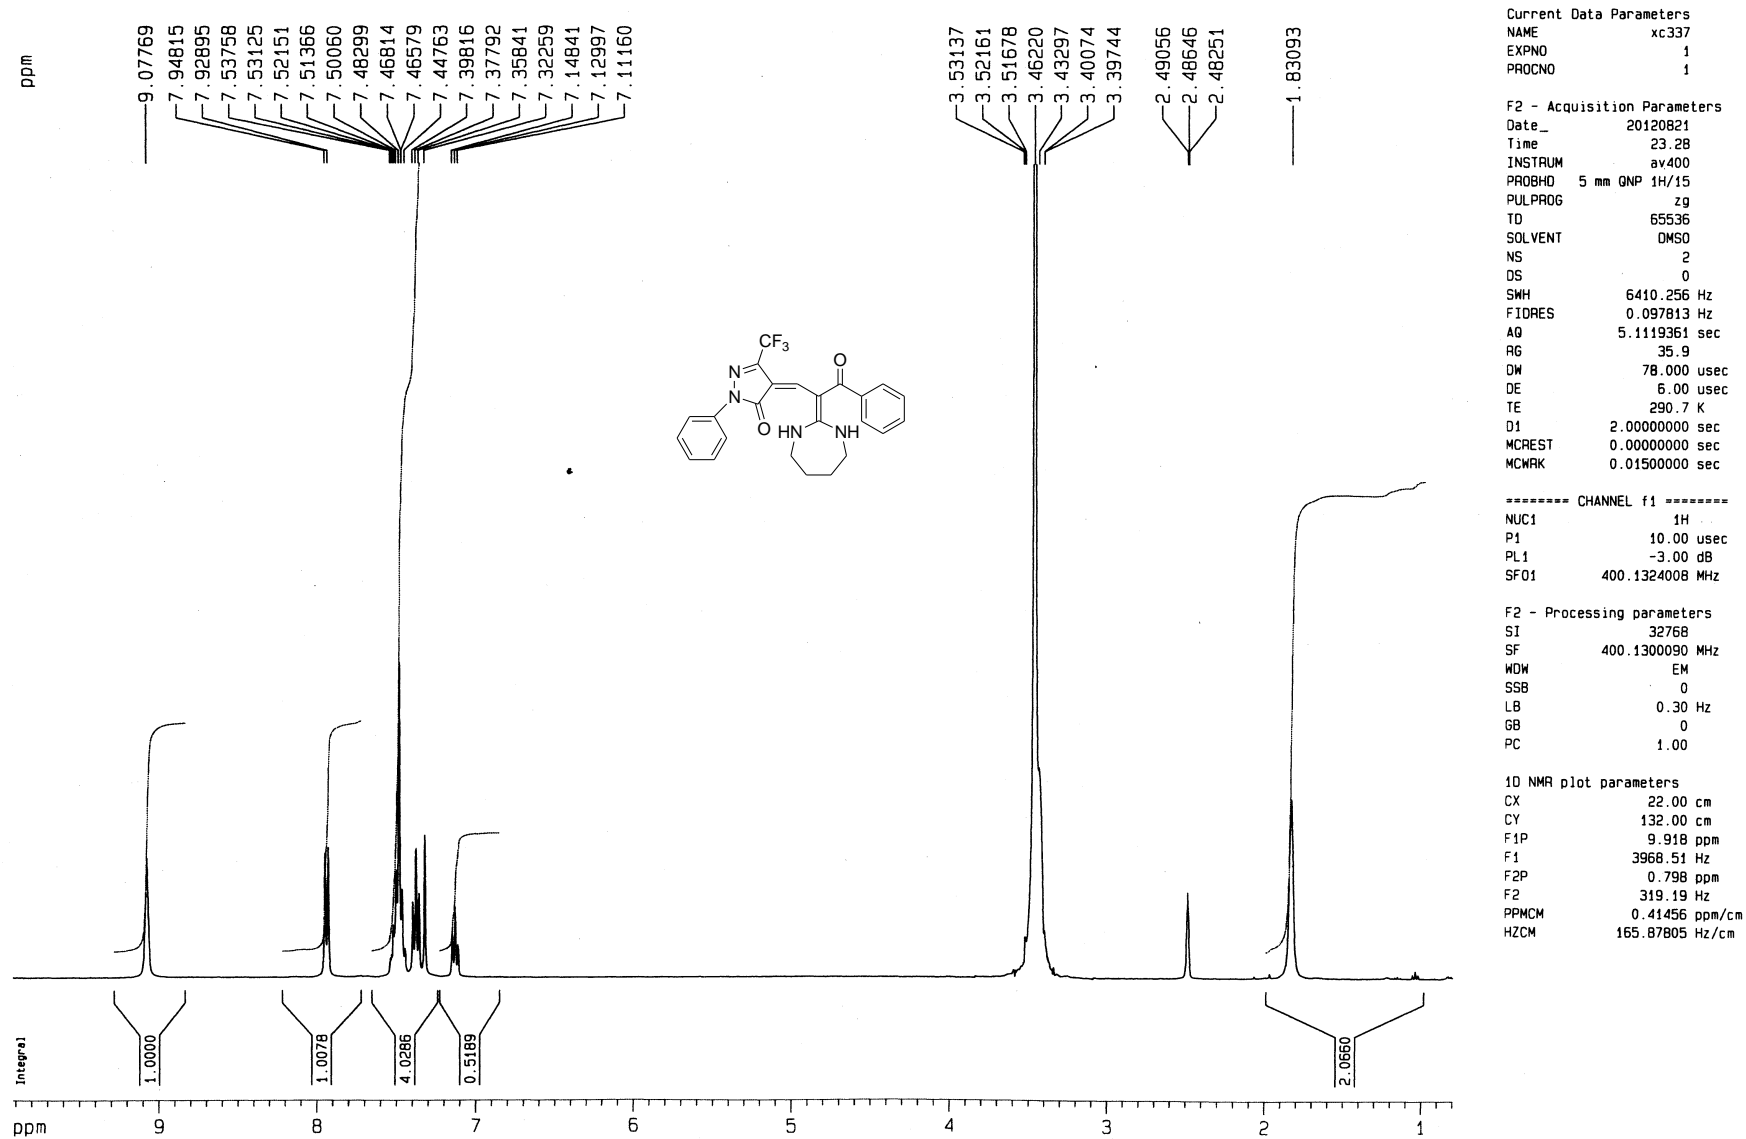

Figure 69.  $^1\text{H}$  NMR (400 MHz,  $\text{DMSO}-d_6$ ) spectra of compound 8h

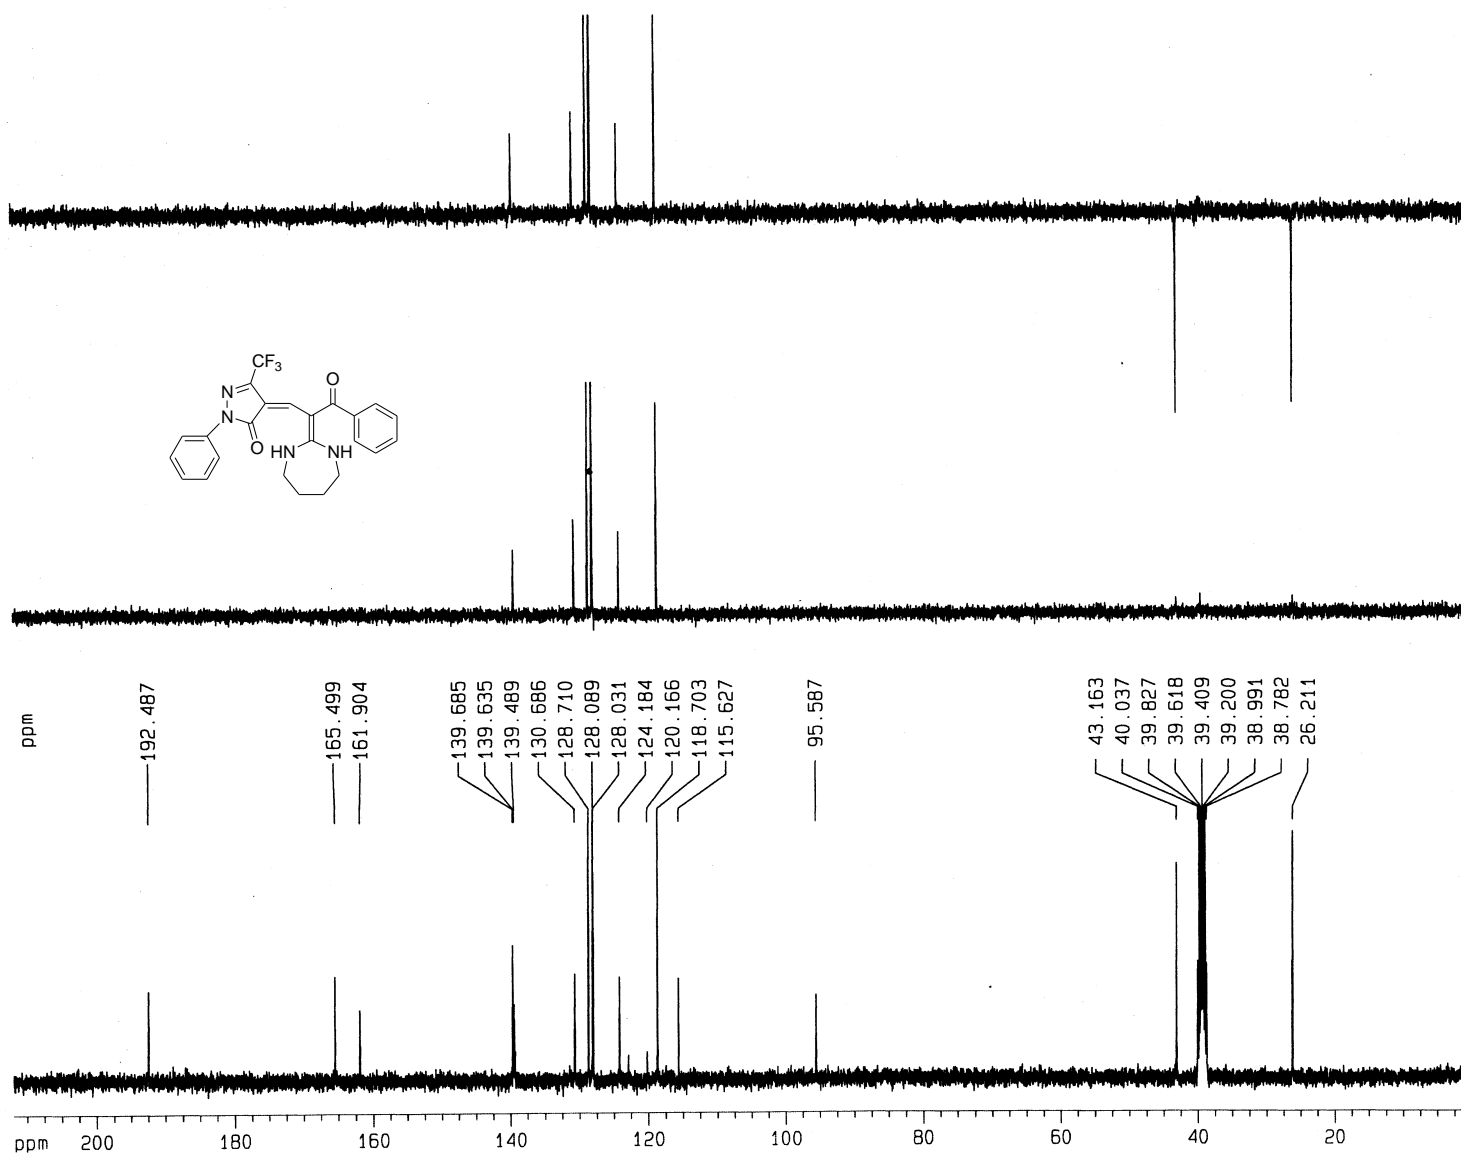

Current Data Parameters  
NAME xc337  
EXPNO 2  
PROCNO 1

F2 - Acquisition Parameters  
Date\_ 20120821  
Time 23.42  
INSTRUM av400  
PROBHD 5 mm QNP 1H/15  
PULPROG zgdc  
TD 32768  
SOLVENT DMSO  
NS 154  
DS 2  
SWH 23148.148 Hz  
FIDRES 0.705425 Hz  
AQ 0.7078604 sec  
RG 71.8  
DM 21.600 usec  
DE 6.00 usec  
TE 291.3 K  
D1 4.50000000 sec  
d11 0.03000000 sec  
MCREST 0.00000000 sec  
MCWRK 0.01500000 sec

----- CHANNEL f1 -----  
NUC1 13C  
P1 9.40 usec  
PL1 -4.00 dB  
SF01 100.6236958 MHz

----- CHANNEL f2 -----  
CPDPRG2 waltz16  
NUC2 1H  
PCPD2 90.00 usec  
PL2 -3.00 dB  
PL12 14.00 dB  
SF02 400.1316005 MHz

F2 - Processing parameters  
SI 32768  
SF 100.6128120 MHz  
WDW EM  
SSB 0  
LB 1.00 Hz  
GB 0  
PC 2.00

1D NMR plot parameters  
CX 22.00 cm  
CY 5.00 cm  
F1P 212.000 ppm  
F1 21329.92 Hz  
F2P 0.000 ppm  
F2 0.00 Hz  
PPMCM 9.63636 ppm/cm  
HZCM 969.54156 Hz/cm

Figure 70.  $^{13}\text{C}$  NMR (100 MHz,  $\text{DMSO}-d_6$ ) spectra of compound 8h



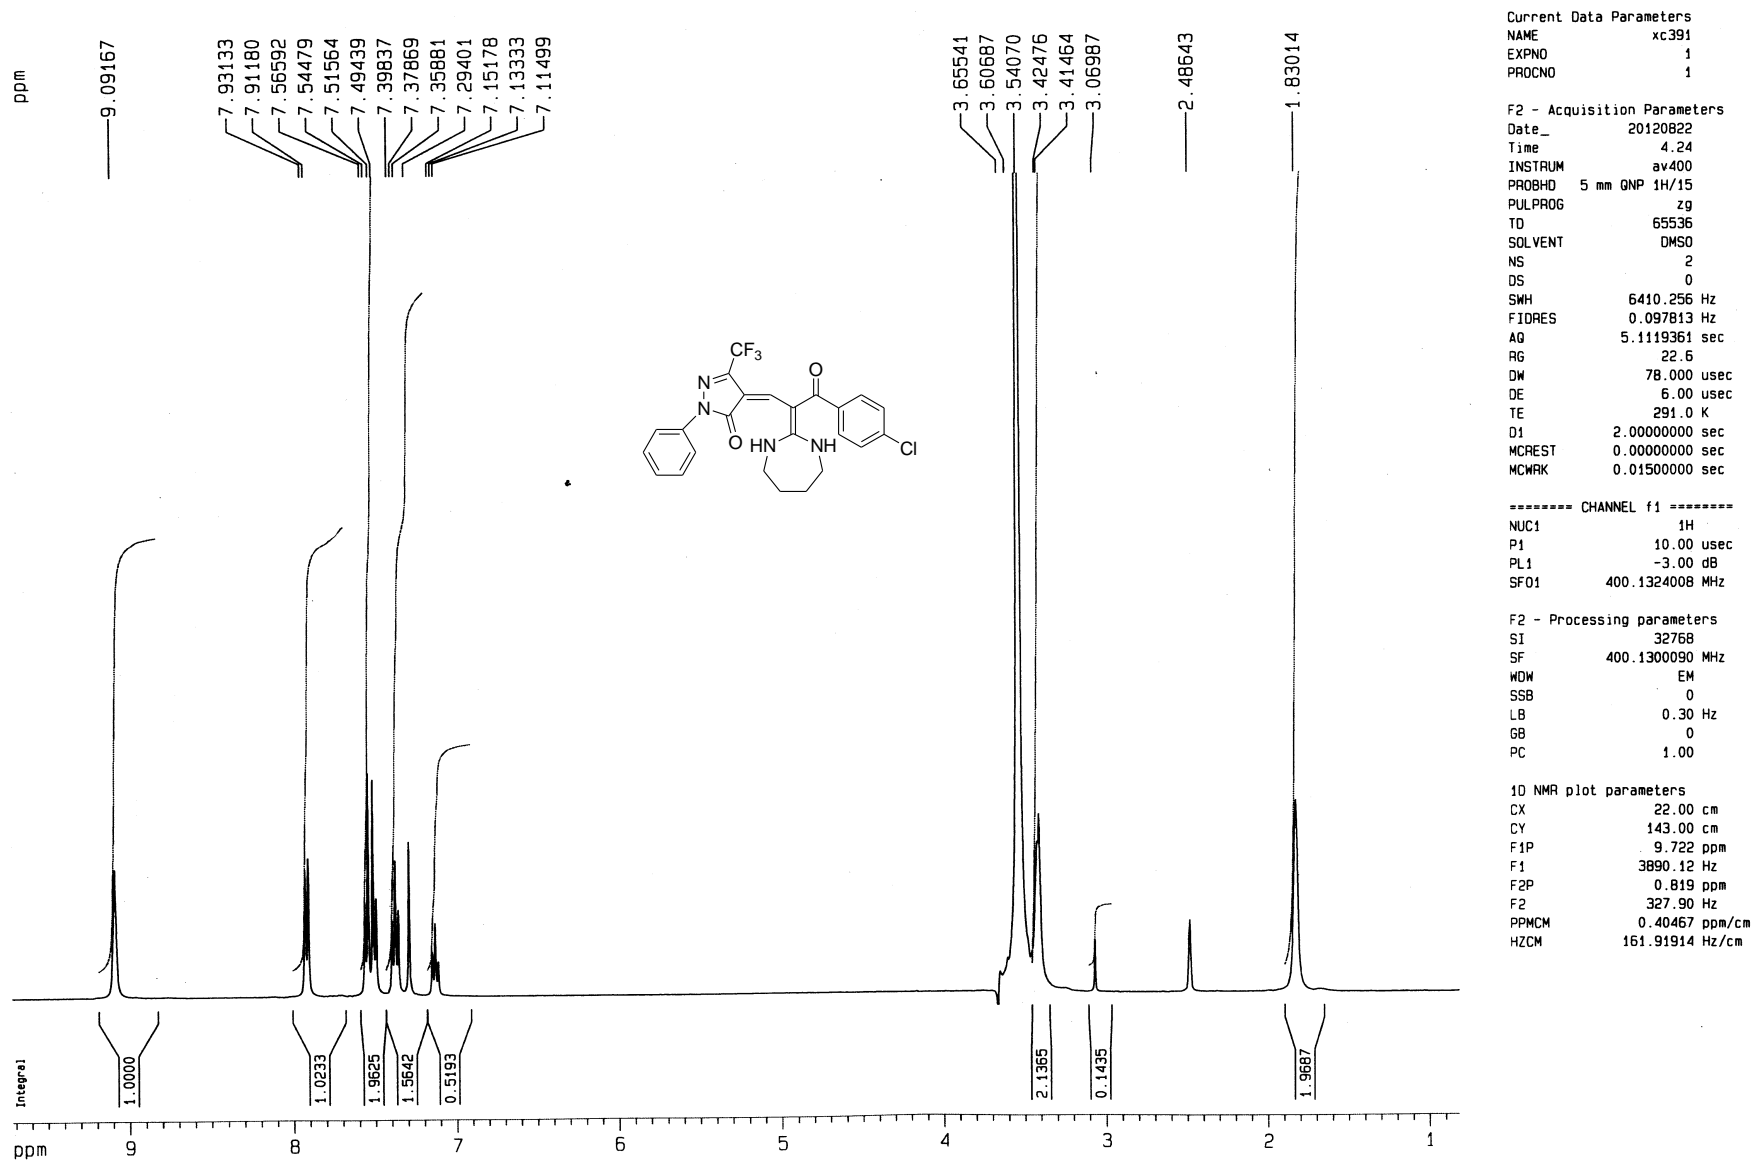

Figure 71. <sup>1</sup>H NMR (400 MHz, DMSO-*d*<sub>6</sub>) spectra of compound **8i**

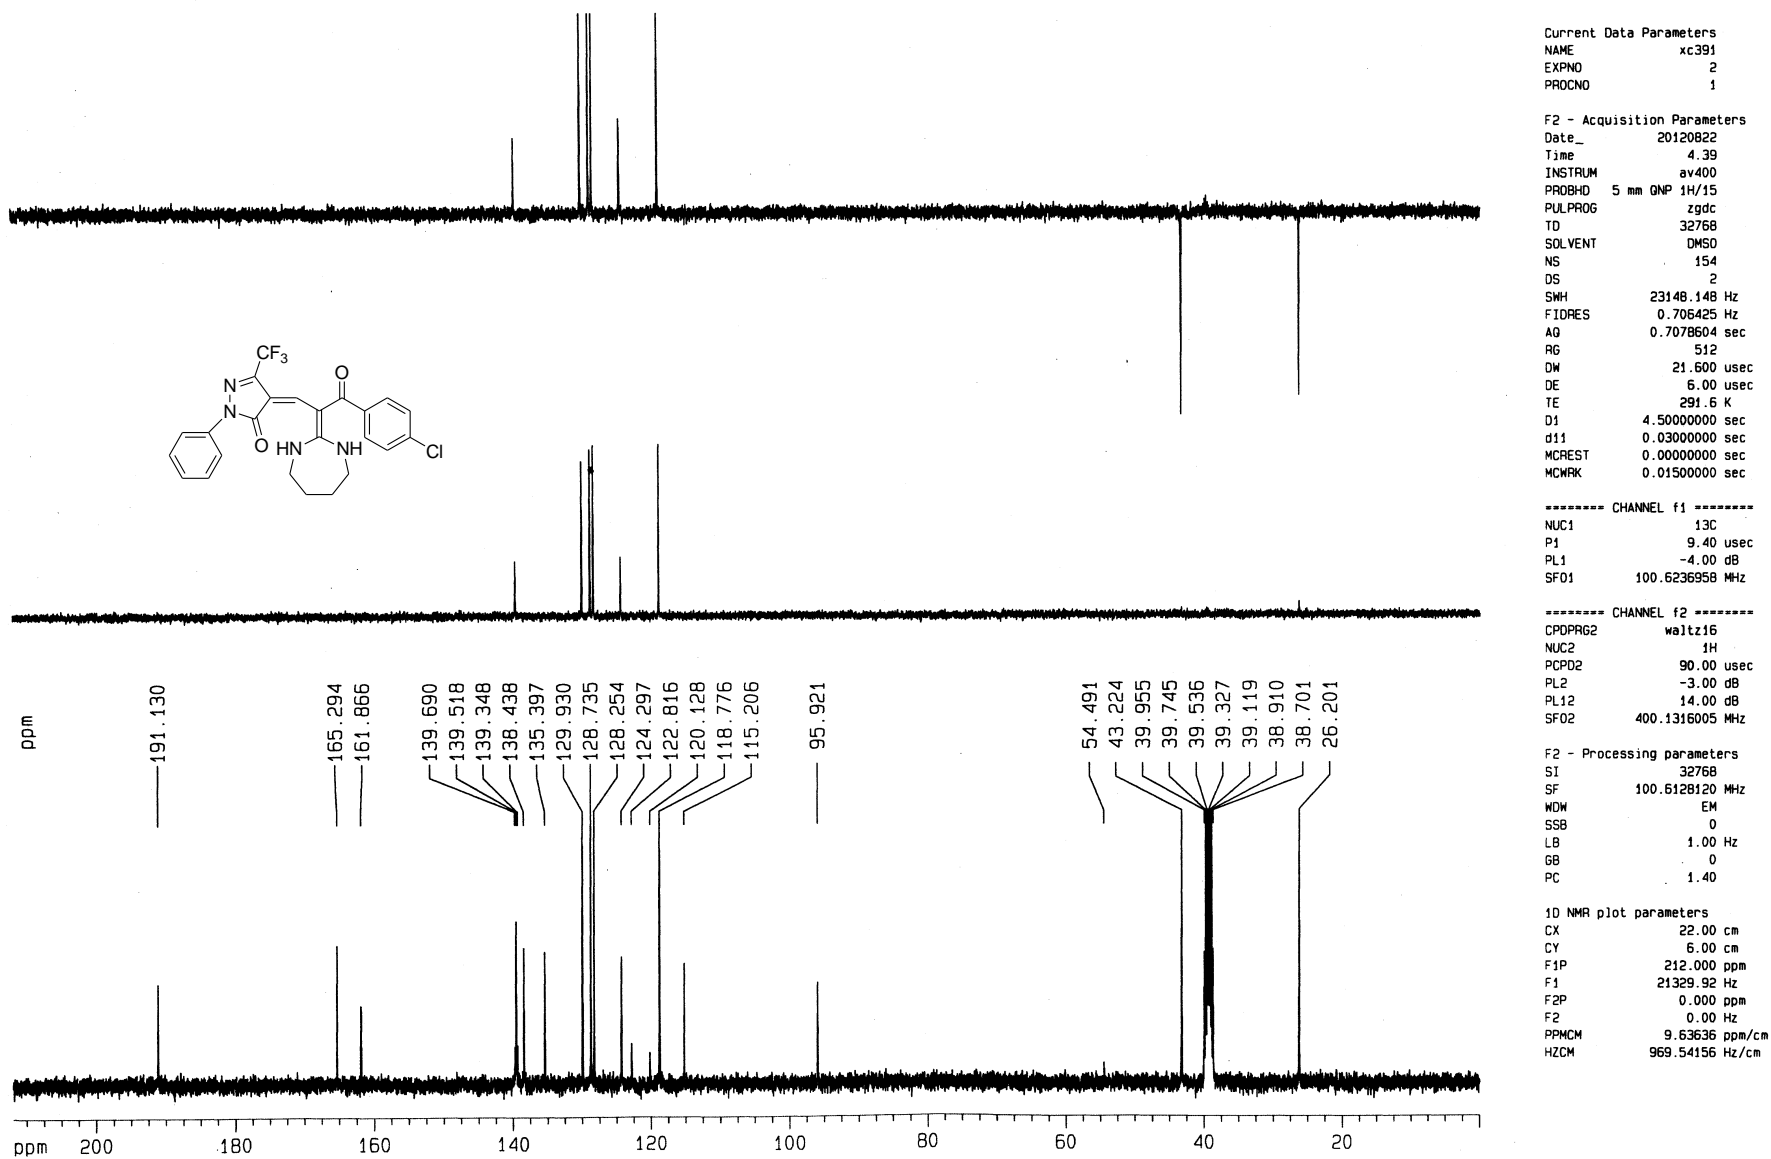

Figure 72.  $^{13}\text{C}$  NMR (100 MHz,  $\text{DMSO-}d_6$ ) spectra of compound **8i**

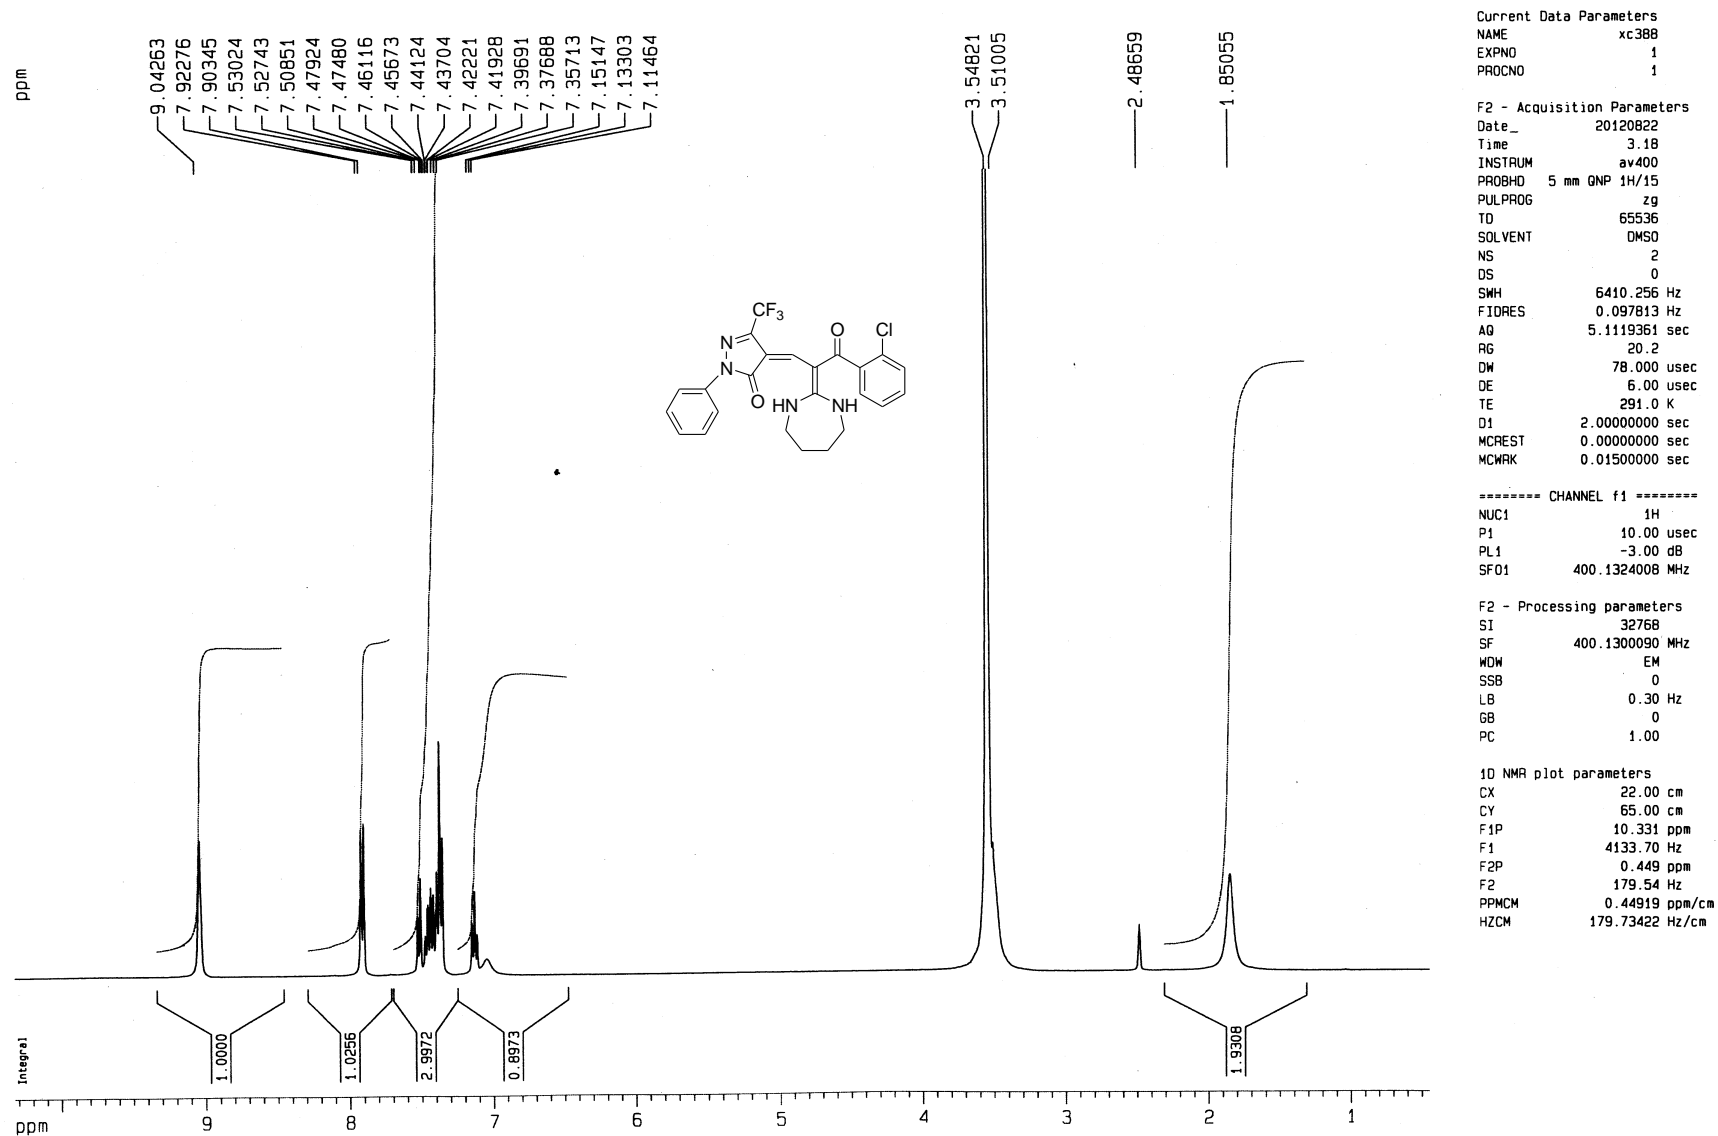

Figure 73. <sup>1</sup>H NMR (400 MHz, DMSO-*d*<sub>6</sub>) spectra of compound **8j**

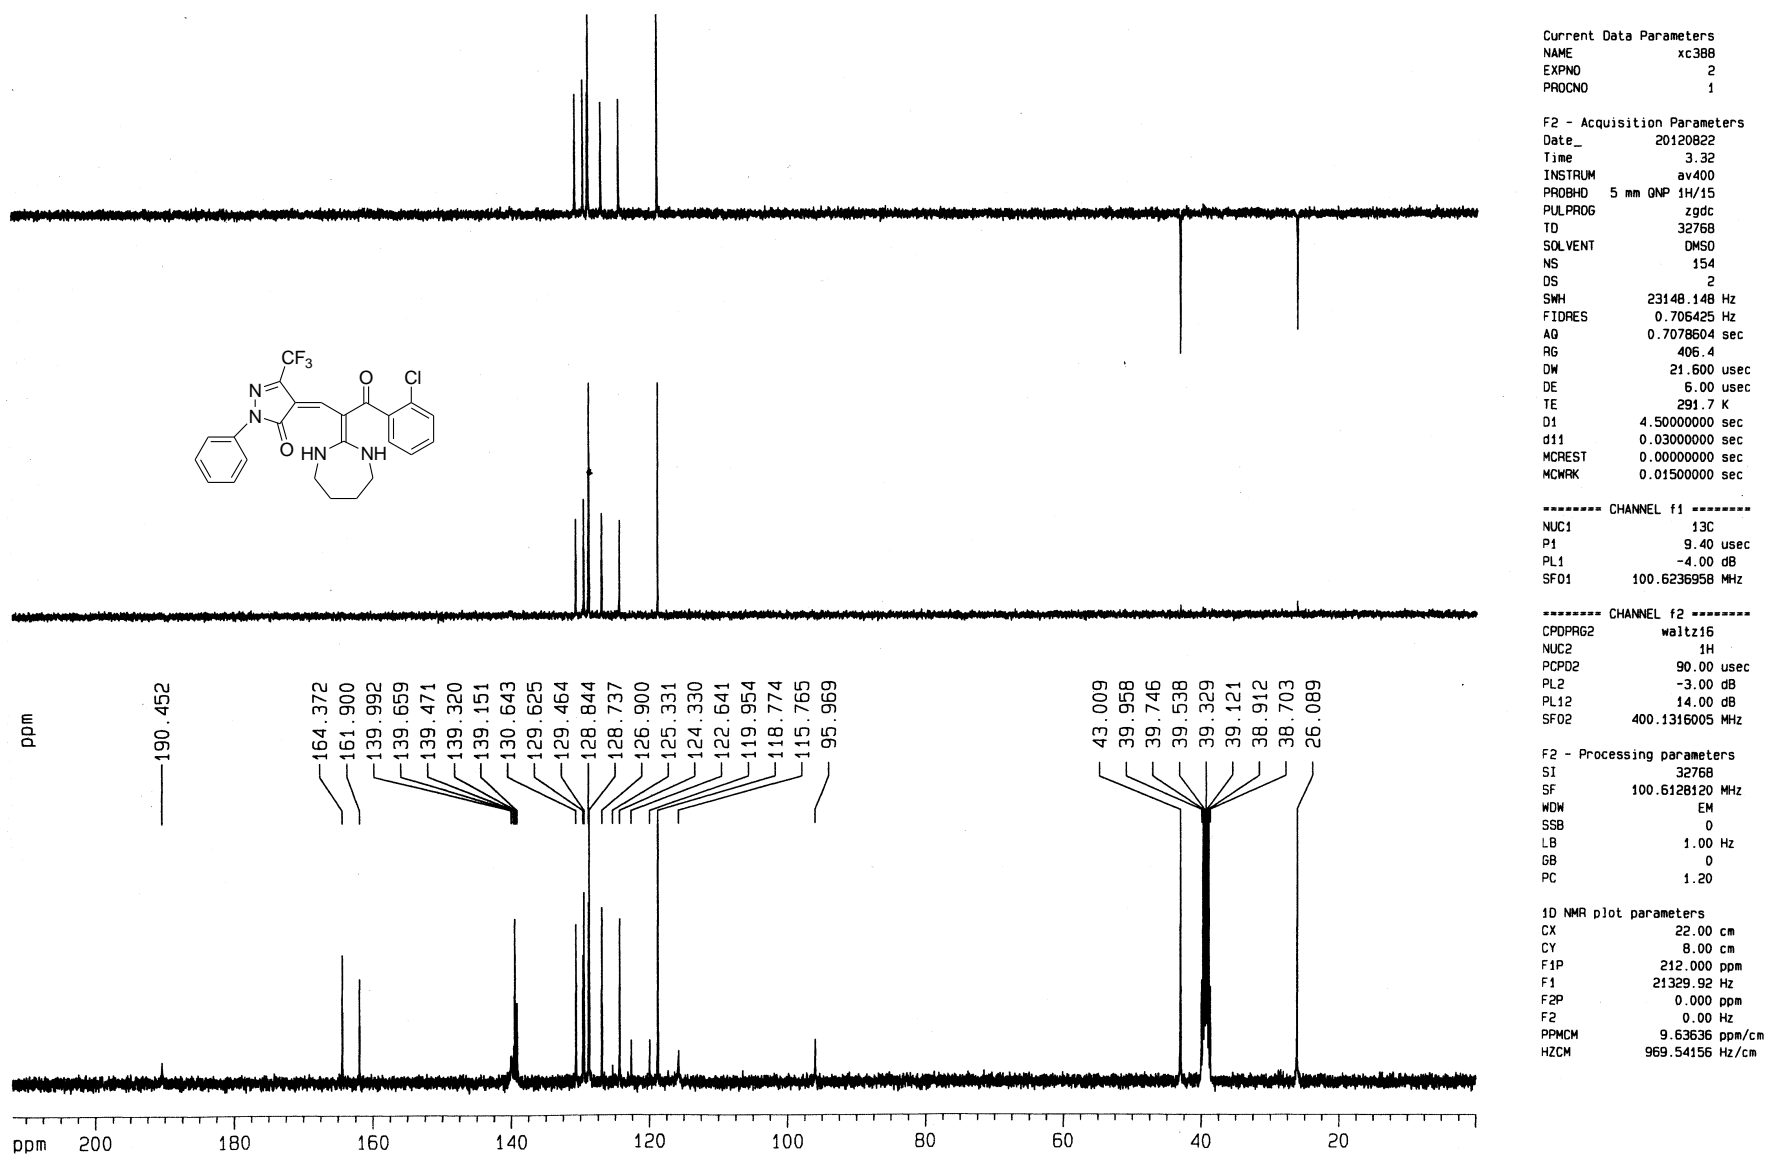

Figure 74. <sup>13</sup>C NMR (100 MHz, DMSO-*d*<sub>6</sub>) spectra of compound **8j**

1. (a) Z.-T. Huang, M.-X. Wang, *Synthesis*, 1992, **12**, 1273; (b) Z.-J. Li, D. Charles, *Synth. Commun.*, 2001, **31**, 527.
2. CCDC 917318 contain the supplementary crystallographic data for compound **6c**. These data can be obtained free of charge from The Cambridge Crystallographic Data Center via [www.ccdc.cam.ac.uk/data\\_request/cif](http://www.ccdc.cam.ac.uk/data_request/cif).
